# Supplementary material for: Palladium-catalyzed directed synthesis of ortho-deuterated phenylacetic acid and analogues
Source: Royal Society of Chemistry journal article supplement (doi:10.1039/d1ob00663k), 2021-01-01

**Electronic Supporting information for**  
**Palladium-catalyzed directed synthesis of ortho-deuterated**  
**phenylacetic acid and analogues**

Priyadarshi Manna<sup>a, b</sup>, Mrinalkanti Kundu<sup>a\*</sup>, Ashis Roy<sup>a, b</sup>, Susanta Adhikari<sup>b\*</sup>

e-mail: [mrinal.kundu@tcgls.com](mailto:mrinal.kundu@tcgls.com), [ssachem@caluniv.ac.in](mailto:ssachem@caluniv.ac.in)

<sup>†</sup>*TCG Lifesciences Pvt. Ltd., BN-7, Sector V, Salt Lake City, Kolkata- 700091, India.*

<sup>§</sup>*Department of Chemistry, University of Calcutta, 92, A. P. C. Road, Kolkata 700009, India.*

***Table of Contents***

|     |                                                                            |          |
|-----|----------------------------------------------------------------------------|----------|
| 1.  | General Information.....                                                   | S2       |
| 2.  | Experimental procedures.....                                               | S2       |
| 2.1 | General experimental procedure for the synthesis of different DG's.....    | S2-S3    |
| 2.2 | Synthesis of amides from corresponding phenylacetic acids .....            | S3       |
| 2.3 | General experimental procedure for the synthesis of deuterated amides..... | S3       |
| 2.4 | Gram-scale synthesis of deuterated biphenyl acetic acid.....               | S3-S4    |
| 3.  | Characterization data of amides.....                                       | S4-S11   |
| 4.  | Characterization data of products.....                                     | S11-S19  |
| 5.  | <sup>1</sup> H, <sup>13</sup> C NMR spectra.....                           | S20-S164 |

## 1. General Information

Remarks: Unless otherwise noted, all reagents were obtained from commercial suppliers and used without further purification. All solvents were purified and dried according to standard methods prior to use. All reactions were carried out in screw cap reaction tubes. Palladium (II) acetate was purchased from Alfa-Aesar. Deuterated solvent D<sub>2</sub>O (99.8 atom % D) was purchased from ARMAR. Thin layer chromatography was performed using Merck aluminium TLC sheets (silica gel 60F254) and visualized by UV irradiation. For column chromatography, products were purified by RediSep® normal-phase silica Flash columns in Teledyne ISCO CombiFlash system. <sup>1</sup>H and <sup>13</sup>C{<sup>1</sup>H} NMR spectra were recorded in CDCl<sub>3</sub> or DMSO-d<sub>6</sub> on a Bruker 400 MHz / 100 MHz and <sup>19</sup>F NMR at 376 / 470 MHz instrument. Tetramethylsilane (TMS) served as the internal standard (δ = 0) and data were reported as follows: chemical shift, integration, multiplicity (s = singlet, d = doublet, t = triplet, q = quartet, m = multiplet), and coupling constant(s) in Hertz. LC HRMS data were obtained using on QTOF-LC/MS.

## 2. Experimental procedures:

### 2.1 General experimental procedure for the synthesis of different DG's (3-amino-1-alkyl-1H-pyridin-2-one):

Directing group (DG) was synthesized following the steps as below. It was found to be moderately stable because of the presence of free amine.

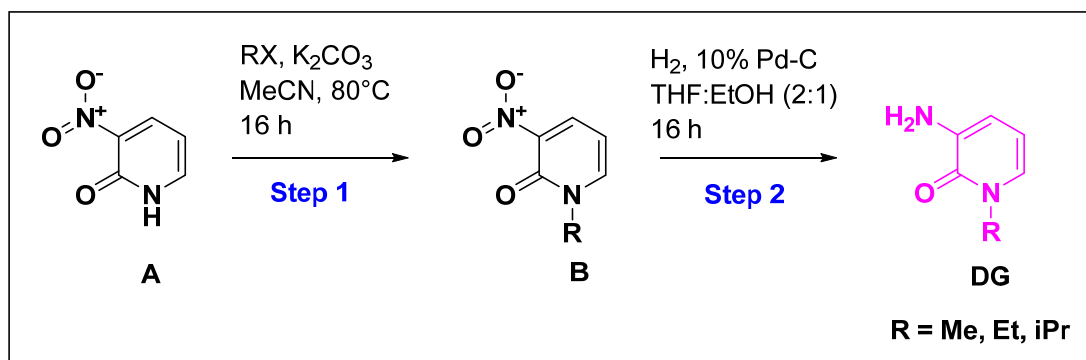

**Step-1:** To a stirred solution of 3-nitropyridin-2(1H)-one **A** (1.0 equiv) in MeCN (1 mL/mmol) was added K<sub>2</sub>CO<sub>3</sub> (3.0 equiv), followed by RX (3.0 equiv) (R= Me, Et, iPr; X=I, Br) and the resulting mixture was then heated at 80°C for overnight. Reaction mixture was then cooled to room temperature, diluted with ethyl acetate and water, layers were separated. Organic layer was dried over anhydrous Na<sub>2</sub>SO<sub>4</sub>, solvent was removed under vacuum and purified by silica gel CombiFlash column chromatography using (Dichloromethane/Methanol = 100/1) as eluent to get pure 1-alkyl-3-nitropyridin-2(1H)-one **B** as yellow solid.

**Step-2:** A stirred solution of 1-alkyl-3-nitropyridin-2(1H)-one **B** (1.0 equiv) in

THF:EtOH (2:1) (6 mL/mmol) was degassed under Argon for 10 minutes. Then to it, was added 10% Pd-C (50% wet with water, 400 mg/gm) and the reaction mixture was subjected to hydrogenation under 50 psi for 16 h. Reaction mixture was filtered through celite pad and filtrate was concentrated to afford 3-amino-1-alkyl-1H-pyridin-2-one **DG** as dark brown gum.

## **2.2 Synthesis of amides (1a, 1b, 1c, 1d, 1e, 1f, 1g, 1h, 1i, 1j, 1k, 1l, 1m, 1n, 1o, 1p, 1q, 1r, 1s, 1t, 1u, 1v) from corresponding phenylacetic acids:**

To a stirred solution of acids (1.0 equiv) in DMF were added HOBT (1.5 equiv) and DIPEA (3.0 equiv) and the mixture was cooled at 0°C. EDC.HCl (1.5 equiv) was added to it and the resulting mixture was allowed to stir for 16 h at room temperature. Upon completion (monitored by TLC), the reaction mixture was quenched with saturated NaHCO<sub>3</sub> and the organic parts were extracted with ethyl acetate (3x50 mL). Combined organic layer was washed with water (2x50 mL), dried over anhydrous Na<sub>2</sub>SO<sub>4</sub>, solvent was removed under vacuum and purified by silica gel CombiFlash column chromatography using (Dichloromethane/ethyl acetate = 5/1) as eluent to get pure amides.

## **2.3 General experimental procedure for the synthesis of deuterated amides 2:**

In a sealed tube, amides 1 (0.4 mmol, 1.0 equiv), Pd(OAc)<sub>2</sub> (0.08 mmol, 0.2 equiv) and D<sub>2</sub>O (99.8% D content, 2 mL) were added. The reaction was stirred at 120 °C for 24 hours. Then, the reaction mixture was cooled to room temperature and the organic components were portioned between water and ethyl acetate. Organic phase was separated, washed with brine and dried with Na<sub>2</sub>SO<sub>4</sub> and concentrated under reduced pressure. The crude mixture was purified by RediSep® normal-phase silica Flash columns in teledyne ISCO CombiFlash system (Dichloromethane/ethyl acetate = 5/1) to give the deuterated amides.

## **2.4 Gram-scale synthesis of deuterated biphenyl acetic acid:**

### **2.4.1 Synthesis of deuterated 2-([1,1'-biphenyl]-2-yl)-N-(1-methyl-2-oxo-1,2-dihydropyridin-3-yl)acetamide:**

In a sealed tube, compound 1v (1.3 g, 4.08 mmol, 1.0 equiv), Pd(OAc)<sub>2</sub> (184 mg, 0.82 mmol, 0.2 equiv) and D<sub>2</sub>O (99.8% D content, 20 mL) were added. The reaction was stirred at 120 °C for 24 hours. Then, the reaction mixture was cooled to room temperature and the organic parts were portioned between water and ethyl acetate. The organic phase was separated, washed with brine and dried over Na<sub>2</sub>SO<sub>4</sub> and concentrated under reduced pressure. The crude mixture was purified by RediSep® normal-phase silica Flash columns in teledyne ISCO CombiFlash system (Dichloromethane/ethyl acetate = 5/1) to give the deuterated amide 2v (1.11 g, 3.47

mmol, 85% yield) as off white solid.

### 2.4.2 Hydrolysis of deuterated biphenylacetic acid:

In an oven-dried screw cap reaction tube containing magnetic bar, deuterated amide 2v (1 mmol) and LiOH.H<sub>2</sub>O (5 mmol) were added. Ethanol (2 mL) was added and the reaction was allowed to stir for 24 hours at 100°C. After completion (TLC monitoring) the reaction mixture was cooled to room temperature and volatiles were removed under vacuum. The mixture was then diluted with a mixture of water and ethyl acetate. The aqueous phase was separated, acidified with 2M aqueous HCl to pH=2 and the organic parts were extracted with diethyl ether. The combined ether phase was washed with brine solution and dried over Na<sub>2</sub>SO<sub>4</sub> and filtered. The filtrate was concentrated under reduced pressure to afford 3 in 70% and we have recovered 3-amino-1-methyl-1H-pyridin-2-one (DG) in 80% yield.

### 3. Characterization data of amides:

#### 2-(2-fluorophenyl)-N-(1-methyl-2-oxo-3-pyridyl)acetamide (1a).

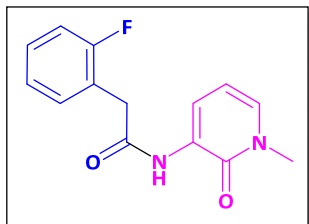

Off white solid, 75% yield. Mp 118–120° C; <sup>1</sup>H NMR (400 MHz, DMSO-d<sub>6</sub>): δ 9.36 (s, 1H), 8.17 (d, *J* = 7.1 Hz, 1H), 7.40-7.29 (m, 3H), 7.19-7.15 (m, 2H), 6.22 (t, *J* = 6.9 Hz, 1H), 3.87 (s, 2H), 3.50 (s, 3H); <sup>13</sup>C{<sup>1</sup>H} NMR (100 MHz, DMSO-d<sub>6</sub>): δ 168.8, 160.5 (d, *J*<sub>C-F</sub> = 242.9 Hz), 156.8, 132.3, 131.8 (d, *J*<sub>C-F</sub> = 4.3 Hz), 128.8 (d, *J*<sub>C-F</sub> = 8.0 Hz), 128.3, 124.2 (d, *J*<sub>C-F</sub> = 3.3 Hz), 122.7 (d, *J*<sub>C-F</sub> = 15.9 Hz), 122.2, 115.0 (d, *J*<sub>C-F</sub> = 21.3 Hz), 104.8, 37.0, 36.4; <sup>19</sup>F NMR (376 MHz, DMSO-d<sub>6</sub>) δ -116.99 to -117.06 (m, 1F); HRMS-ESI (m/z): calcd for C<sub>14</sub>H<sub>13</sub>FN<sub>2</sub>O<sub>2</sub>Na [M + Na]<sup>+</sup> 283.0859, found 283.0852.

#### N-(1-methyl-2-oxo-3-pyridyl)-2-(o-tolyl)acetamide (1b).

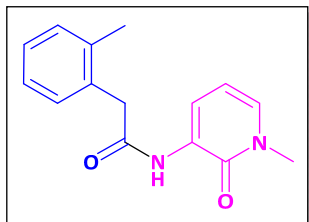

Off white solid, 73% yield. Mp 128–130° C; <sup>1</sup>H NMR (400 MHz, DMSO-d<sub>6</sub>): δ 9.15 (s, 1H), 8.19-8.17 (m, 1H), 7.39-7.37 (m, 1H), 7.25-7.23 (m, 1H), 7.17-7.11 (m, 3H), 6.21 (t, *J* = 7.1 Hz, 1H), 3.82 (s, 2H), 3.47 (s, 3H), 2.25 (s, 3H); <sup>13</sup>C{<sup>1</sup>H} NMR (100 MHz, DMSO-d<sub>6</sub>): δ 169.6, 156.8, 136.6, 134.1, 132.1, 130.0, 129.9, 128.3, 126.8, 125.8,

121.8, 104.9, 41.1, 36.9, 19.1; HRMS-ESI (m/z): calcd for C<sub>15</sub>H<sub>16</sub>N<sub>2</sub>O<sub>2</sub>Na [M + Na]<sup>+</sup> 279.1109 , found 279.1091.

### 2-(2-chlorophenyl)-N-(1-methyl-2-oxo-3-pyridyl)acetamide (1c).

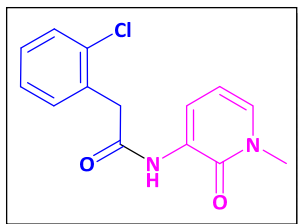

Off white solid, 60% yield. Mp 142-144° C; <sup>1</sup>H NMR (400 MHz, DMSO-d<sub>6</sub>): δ 9.29 (s, 1H), 8.17-8.16 (m, 1H), 7.47-7.38 (m, 3H), 7.32-7.30 (m, 2H), 6.22 (t, *J* = 7.1 Hz, 1H), 3.96 (s, 2H), 3.49 (s, 3H); <sup>13</sup>C {<sup>1</sup>H} NMR (100 MHz, DMSO-d<sub>6</sub>): δ 168.6, 156.8, 133.6, 133.6, 132.3, 132.0, 129.0, 128.6, 128.3, 127.1, 122.0, 104.9, 41.0, 37.0; HRMS-ESI (m/z): calcd for C<sub>14</sub>H<sub>13</sub>ClN<sub>2</sub>NaO<sub>2</sub> [M + Na]<sup>+</sup> 299.0563 , found 299.0558.

### 2-(2-methoxyphenyl)-N-(1-methyl-2-oxo-3-pyridyl)acetamide (1d).

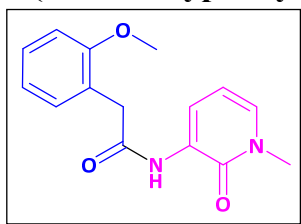

Off white solid, 63% yield. Mp 112-114° C; <sup>1</sup>H NMR (400 MHz, DMSO-d<sub>6</sub>): δ 9.08 (s, 1H), 8.15 (d, *J* = 7.4 Hz, 1H), 7.36 (d, *J* = 6.6 Hz, 1H), 7.29-7.22 (m, 2H), 7.02 (d, *J* = 8.1 Hz, 1H), 6.92 (t, *J* = 7.2 Hz, 1H), 6.21 (t, *J* = 7.1 Hz, 1H), 3.81 (s, 3H), 3.69 (s, 2H), 3.47 (s, 3H); <sup>13</sup>C {<sup>1</sup>H} NMR (100 MHz, DMSO-d<sub>6</sub>): δ 169.5, 156.8, 156.7, 131.9, 130.8, 128.5, 128.4, 123.3, 121.2, 120.4, 110.8, 105.0, 55.4, 40.0, 37.0; HRMS-ESI (m/z): calcd for C<sub>15</sub>H<sub>17</sub>N<sub>2</sub>O<sub>3</sub> [M + H]<sup>+</sup> 273.1239 , found 273.1245.

### N-(1-methyl-2-oxo-3-pyridyl)-2-phenylacetamide (1e).

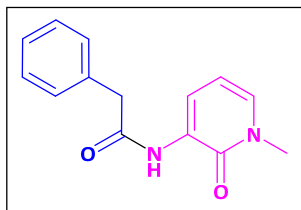

Off white solid, 71% yield. Mp 130-132° C; <sup>1</sup>H NMR (400 MHz, DMSO-d<sub>6</sub>): δ 9.31 (s, 1H), 8.18 (d, *J* = 7.2 Hz, 1H), 7.38 (d, *J* = 6.6 Hz, 1H), 7.33-7.29 (m, 4H), 7.27-7.24 (m, 1H), 6.21 (t, *J* = 7.0 Hz, 1H), 3.79 (s, 2H), 3.48 (s, 3H); <sup>13</sup>C {<sup>1</sup>H} NMR (100 MHz, DMSO-d<sub>6</sub>): δ 169.9, 156.8, 135.7, 132.3, 129.1, 128.4, 128.2, 126.5, 122.2, 104.8, 43.0, 37.0; HRMS-ESI (m/z): calcd for C<sub>14</sub>H<sub>14</sub>N<sub>2</sub>O<sub>2</sub>Na [M + Na]<sup>+</sup> 265.0953 , found 265.0945.

**N-(1-methyl-2-oxo-3-pyridyl)-2-(m-tolyl)acetamide (1f).**

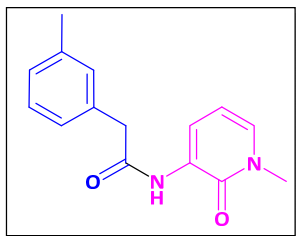

Off white solid, 84% yield. Mp 116-118° C;  $^1\text{H}$  NMR (400 MHz, DMSO- $d_6$ ):  $\delta$  9.28 (s, 1H), 8.19-8.17 (m, 1H), 7.39-7.38 (m, 1H), 7.22-7.18 (m, 1H), 7.13-7.10 (m, 2H), 7.06-7.05 (m, 1H), 6.21 (t,  $J = 7.1$  Hz, 1H), 3.74 (s, 2H), 3.48 (s, 3H), 2.28 (s, 3H);  $^{13}\text{C}\{^1\text{H}\}$  NMR (100 MHz, DMSO- $d_6$ ):  $\delta$  169.9, 156.8, 137.3, 135.5, 132.3, 129.7, 128.4, 128.2, 127.1, 126.2, 122.1, 104.8, 42.9, 37.0, 20.8; HRMS-ESI (m/z): calcd for  $\text{C}_{15}\text{H}_{17}\text{N}_2\text{O}_2$  [M + H] $^+$  257.3077, found 257.3079.

**2-(3-fluorophenyl)-N-(1-methyl-2-oxo-3-pyridyl)acetamide (1g).**

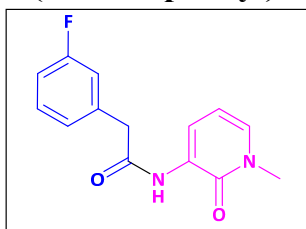

Off white solid, 80% yield. Mp 116-118° C;  $^1\text{H}$  NMR (400 MHz, DMSO- $d_6$ ):  $\delta$  9.43 (s, 1H), 8.19-8.17 (m, 1H), 7.41-7.33 (m, 2H), 7.19-7.15 (m, 2H), 7.10-7.06 (m, 1H), 6.21 (t,  $J = 7.1$  Hz, 1H), 3.83 (s, 2H), 3.49 (s, 3H);  $^{13}\text{C}\{^1\text{H}\}$  NMR (100 MHz, DMSO- $d_6$ ):  $\delta$  169.4, 161.9 (d,  $J_{\text{C-F}} = 241.6$  Hz), 156.8, 138.4 (d,  $J_{\text{C-F}} = 7.8$  Hz), 132.4, 130.0 (d,  $J_{\text{C-F}} = 8.2$  Hz), 128.3, 125.3 (d,  $J_{\text{C-F}} = 2.5$  Hz), 122.4, 115.9 (d,  $J_{\text{C-F}} = 21.2$  Hz), 113.3 (d,  $J_{\text{C-F}} = 20.6$  Hz), 104.8, 42.4, 37.0;  $^{19}\text{F}$  NMR (470 MHz, DMSO- $d_6$ )  $\delta$  -113.6 (s, 1F); HRMS-ESI (m/z): calcd for  $\text{C}_{14}\text{H}_{13}\text{FN}_2\text{NaO}_2$  [M + Na] $^+$  283.0859, found 283.0619.

**N-(1-methyl-2-oxo-3-pyridyl)-2-(p-tolyl)acetamide (1h).**

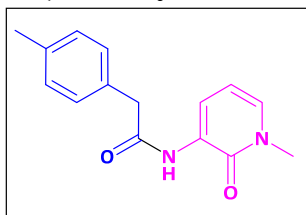

Off white solid, 68% yield. Mp 130-132° C;  $^1\text{H}$  NMR (400 MHz, DMSO- $d_6$ ):  $\delta$  9.21 (s, 1H), 8.18-8.16 (m, 1H), 7.38-7.36 (m, 1H), 7.20 (d,  $J = 7.8$  Hz, 2H), 7.12 (d,  $J = 7.8$  Hz, 2H), 6.20 (t,  $J = 7.1$  Hz, 1H), 3.73 (s, 2H), 3.47 (s, 3H), 2.27 (s, 3H);  $^{13}\text{C}\{^1\text{H}\}$  NMR (100 MHz, DMSO- $d_6$ ):  $\delta$  170.1, 156.8, 135.6, 132.6, 132.2, 129.0, 128.9, 128.4, 122.0, 104.9, 42.6, 37.0, 20.5; HRMS-ESI (m/z): calcd for  $\text{C}_{15}\text{H}_{16}\text{N}_2\text{NaO}_2$  [M + Na] $^+$  279.1109, found 279.0916.

### 2-(4-fluorophenyl)-N-(1-methyl-2-oxo-3-pyridyl)acetamide (1i).

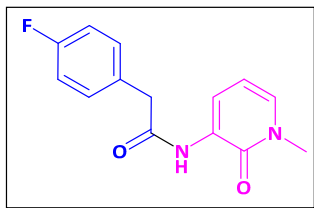

Off white solid, 65% yield. Mp 146-148 °C;  $^1\text{H}$  NMR (400 MHz, DMSO- $d_6$ ):  $\delta$  9.35 (s, 1H), 8.18-8.17 (m, 1H), 7.40-7.34 (m, 3H), 7.16-7.12 (m, 2H), 6.21 (t,  $J = 7.0$  Hz, 1H), 3.79 (s, 2H), 3.48 (s, 3H);  $^{13}\text{C}$   $\{^1\text{H}\}$  NMR (100 MHz, DMSO- $d_6$ ):  $\delta$  170.2, 161.4 (d,  $J_{C-F} = 240.9$  Hz), 157.2, 132.7, 132.2 (d,  $J_{C-F} = 2.9$  Hz), 131.3 (d,  $J_{C-F} = 8.0$  Hz), 128.7, 122.6, 115.3 (d,  $J_{C-F} = 21.0$  Hz), 105.2, 42.2, 37.3;  $^{19}\text{F}$  NMR (470 MHz, DMSO- $d_6$ )  $\delta$  -116.4 (s, 1F); HRMS-ESI (m/z): calcd for  $\text{C}_{14}\text{H}_{13}\text{FN}_2\text{NaO}_2$   $[\text{M} + \text{Na}]^+$  283.0859, found 283.0619.

### 2-(2,4-difluorophenyl)-N-(1-methyl-2-oxo-3-pyridyl)acetamide (1j).

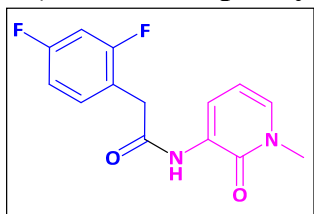

Off white solid, 72% yield. Mp 140-142 °C;  $^1\text{H}$  NMR (400 MHz, DMSO- $d_6$ ):  $\delta$  9.41 (s, 1H), 8.16 (d,  $J = 6.0$  Hz, 1H), 7.45-7.39 (m, 2H), 7.24-7.18 (m, 1H), 7.08-7.03 (m, 1H), 6.21 (t,  $J = 7.1$  Hz, 1H), 3.86 (s, 2H), 3.50 (s, 3H);  $^{13}\text{C}$   $\{^1\text{H}\}$  NMR (100 MHz, DMSO- $d_6$ ):  $\delta$  168.7, 161.2 (dd,  $J_{C-F} = 244.8, 13.2$  Hz), 160.5 (dd,  $J_{C-F} = 245.4, 12.1$  Hz), 156.8, 132.8 (dd,  $J_{C-F} = 9.5, 6.0$  Hz), 132.3, 128.3, 122.3, 119.1 (dd,  $J_{C-F} = 16.1, 3.6$  Hz), 111.1 (dd,  $J_{C-F} = 20.9, 3.5$  Hz), 104.8, 103.5 (t,  $J_{C-F} = 25.8$  Hz), 37.0, 35.8;  $^{19}\text{F}$  NMR (376 MHz, DMSO- $d_6$ )  $\delta$  -112.1 (d,  $J = 7.3$  Hz, 1F), -112.5 (d,  $J = 7.2$  Hz, 1F); HRMS-ESI (m/z): calcd for  $\text{C}_{14}\text{H}_{13}\text{F}_2\text{N}_2\text{O}_2$   $[\text{M} + \text{H}]^+$  279.0945, found 279.0962.

### N-(1-methyl-2-oxo-1,2-dihydropyridin-3-yl)-2-(2-nitrophenyl)acetamide (1k)

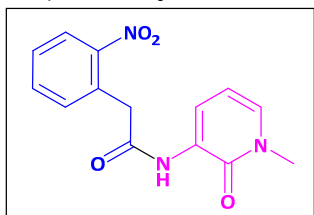

Light yellow solid, 72% yield. Mp 190-192 °C;  $^1\text{H}$  NMR (400 MHz, DMSO- $d_6$ ):  $\delta$  9.50 (s, 1H), 8.07 (dd,  $J = 22.16, 7.04$  Hz, 2H), 7.71 (t,  $J = 7.54$  Hz, 1H), 7.59-7.54 (m, 2H), 7.40 (d,  $J = 6.68$  Hz, 1H), 6.20 (t,  $J = 7.02$  Hz, 1H), 4.24 (s, 2H), 3.50 (s, 3H);  $^{13}\text{C}$   $\{^1\text{H}\}$  NMR (100 MHz, DMSO- $d_6$ ):  $\delta$  168.4, 156.8, 148.9, 133.4, 133.3, 132.3, 130.3, 128.4, 128.3, 124.4, 122.2, 104.8, 40.6, 37.0; LCMS (ESI) calcd for  $\text{C}_{14}\text{H}_{14}\text{N}_3\text{O}_4$ : 288.10 (M + H) $^+$ ; found: 288.39.

### N-(1-methyl-2-oxo-1,2-dihydropyridin-3-yl)-2-phenylpropanamide (1l)

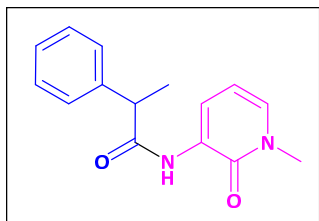

Off white solid, 80% yield. Mp 138-140 °C;  $^1\text{H}$  NMR (400 MHz, DMSO- $d_6$ ):  $\delta$  9.15 (s, 1H), 8.19 (d,  $J = 7.0$  Hz, 1H), 7.40-7.37 (m, 3H), 7.32 (t,  $J = 7.48$  Hz, 2H), 7.25-7.21 (m, 1H), 6.20 (t,  $J = 7.1$  Hz, 1H), 4.17-4.14 (m, 1H), 3.46 (s, 3H), 1.38 (d,  $J = 7.0$  Hz, 3H);  $^{13}\text{C}\{^1\text{H}\}$  NMR (100 MHz, DMSO- $d_6$ ):  $\delta$  172.9, 156.8, 141.6, 132.2, 128.4, 128.3, 127.3, 126.7, 122.0, 104.9, 45.3, 37.0, 18.3; LCMS (ESI) calcd for  $\text{C}_{15}\text{H}_{17}\text{N}_2\text{O}_2$ : 257.13 (M + H) $^+$ ; found: 257.23.

### N-(1-methyl-2-oxo-3-pyridyl)-2-(2-thienyl)acetamide (1m).

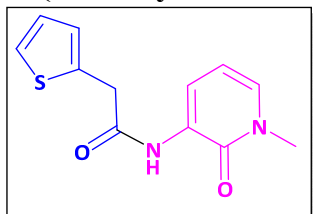

Off white solid, 72% yield. Mp 146-148 °C;  $^1\text{H}$  NMR (400 MHz, DMSO- $d_6$ ):  $\delta$  9.42 (s, 1H), 8.20 (d,  $J = 6.0$  Hz, 1H), 7.41-7.38 (m, 2H), 6.98-6.96 (m, 2H), 6.22 (t,  $J = 7.0$  Hz, 1H), 4.04 (s, 2H), 3.49 (s, 3H);  $^{13}\text{C}\{^1\text{H}\}$  NMR (100 MHz, DMSO- $d_6$ ):  $\delta$  168.9, 156.8, 136.8, 132.4, 128.3, 126.7, 126.6, 125.1, 122.3, 104.8, 37.1, 37.0; HRMS-ESI (m/z): calcd for  $\text{C}_{12}\text{H}_{12}\text{N}_2\text{NaO}_2\text{S}$  [M + Na] $^+$  271.0517, found 271.0312.

### N-(1-methyl-2-oxo-3-pyridyl)-2-(1-naphthyl)acetamide (1n).

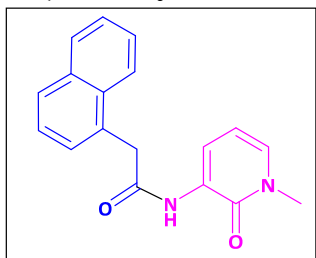

Off white solid, 72% yield. Mp 128-130 °C;  $^1\text{H}$  NMR (400 MHz, DMSO- $d_6$ ):  $\delta$  9.35 (s, 1H), 8.17-8.15 (m, 1H), 8.09 (d,  $J = 8.3$  Hz, 1H), 7.95-7.92 (m, 1H), 7.86 (d,  $J = 7.8$  Hz, 1H), 7.56-7.46 (m, 4H), 7.38-7.36 (m, 1H), 6.19 (t,  $J = 7.1$  Hz, 1H), 4.30 (s, 2H), 3.46 (s, 3H);  $^{13}\text{C}\{^1\text{H}\}$  NMR (100 MHz, DMSO- $d_6$ ):  $\delta$  169.8, 156.7, 133.3, 132.2, 132.1, 131.8, 128.4, 128.3, 128.0, 127.3, 126.1, 125.6, 125.5, 124.0, 121.9, 104.9, 40.6, 37.0; HRMS-ESI (m/z): calcd for  $\text{C}_{18}\text{H}_{16}\text{N}_2\text{NaO}_2$  [M + Na] $^+$  315.1109, found 315.0929.

### N-(1-methyl-2-oxo-3-pyridyl)-2-(2-naphthyl)acetamide (1o).



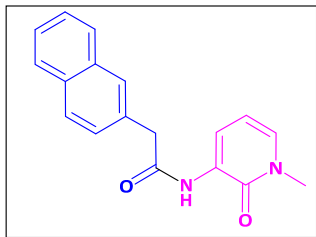

Off white solid, 55% yield. Mp 152-154 °C;  $^1\text{H}$  NMR (400 MHz, DMSO- $d_6$ ):  $\delta$  9.37 (s, 1H), 8.20 (d,  $J = 7.1$  Hz, 1H), 7.90-7.84 (m, 4H), 7.52-7.48 (m, 3H), 7.38 (d,  $J = 6.5$  Hz, 1H), 6.21 (t,  $J = 7.1$  Hz, 1H), 3.97 (s, 2H), 3.47 (s, 3H);  $^{13}\text{C}\{^1\text{H}\}$  NMR (100 MHz, DMSO- $d_6$ ):  $\delta$  169.9, 156.8, 133.3, 132.9, 132.3, 131.8, 128.4, 127.7, 127.6, 127.5, 127.4, 127.3, 126.0, 125.5, 122.2, 104.8, 43.1, 37.0; HRMS-ESI ( $m/z$ ): calcd for  $\text{C}_{18}\text{H}_{16}\text{N}_2\text{NaO}_2$  [ $\text{M} + \text{Na}$ ] $^+$  315.1109, found 315.1111.

### 2-(1-methylindol-3-yl)-N-(1-methyl-2-oxo-3-pyridyl)acetamide (1p).

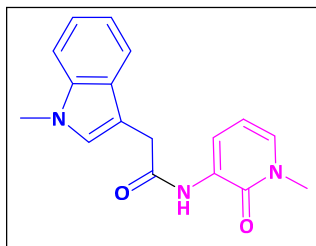

Off white solid, 85% yield. Mp 138-140 °C;  $^1\text{H}$  NMR (400 MHz, DMSO- $d_6$ ):  $\delta$  9.09 (s, 1H), 8.20 (d,  $J = 7.3$  Hz, 1H), 7.57 (d,  $J = 7.8$  Hz, 1H), 7.41 (d,  $J = 8.2$  Hz, 1H), 7.35 (d,  $J = 6.7$  Hz, 1H), 7.30 (s, 1H), 7.15 (t,  $J = 7.5$  Hz, 1H), 7.01 (t,  $J = 7.4$  Hz, 1H), 6.20 (t,  $J = 7.1$  Hz, 1H), 3.85 (s, 2H), 3.77 (s, 3H), 3.44 (s, 3H);  $^{13}\text{C}\{^1\text{H}\}$  NMR (100 MHz, DMSO- $d_6$ ):  $\delta$  170.3, 156.7, 136.5, 132.0, 128.5, 128.3, 127.3, 121.4, 121.1, 118.7, 118.6, 109.5, 107.2, 104.9, 36.9, 33.4, 32.2; HRMS-ESI ( $m/z$ ): calcd for  $\text{C}_{17}\text{H}_{17}\text{N}_3\text{O}_2\text{Na}$  [ $\text{M} + \text{Na}$ ] $^+$  318.1218, found 318.1210.

### 2-(1-ethylindol-3-yl)-N-(1-methyl-2-oxo-3-pyridyl)acetamide (1q).

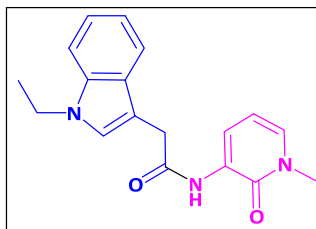

Off white solid, 60% yield. Mp 120-122 °C;  $^1\text{H}$  NMR (400 MHz, DMSO- $d_6$ ):  $\delta$  9.09 (s, 1H), 8.21-8.19 (m, 1H), 7.56 (d,  $J = 7.8$  Hz, 1H), 7.45 (d,  $J = 8.2$  Hz, 1H), 7.37-7.34 (m, 2H), 7.13 (t,  $J = 7.4$  Hz, 1H), 7.00 (t,  $J = 7.3$  Hz, 1H), 6.20 (t,  $J = 7.0$  Hz, 1H), 4.19 (q,  $J = 14.2, 7.0$  Hz, 2H), 3.85 (s, 2H), 3.44 (s, 3H), 1.35 (t,  $J = 7.1$  Hz, 3H);  $^{13}\text{C}\{^1\text{H}\}$  NMR (100 MHz, DMSO- $d_6$ ):  $\delta$  170.3, 156.7, 135.5, 132.0, 128.3, 127.4, 126.8, 121.4, 121.1, 118.8, 118.5, 109.5, 107.4, 104.9, 40.0, 36.9, 33.5, 15.3; HRMS-ESI ( $m/z$ ): calcd for  $\text{C}_{18}\text{H}_{19}\text{N}_3\text{O}_2\text{Na}$  [ $\text{M} + \text{Na}$ ] $^+$  332.1375, found 332.1368.

**2-indol-1-yl-N-(1-methyl-2-oxo-3-pyridyl)acetamide (1r).**

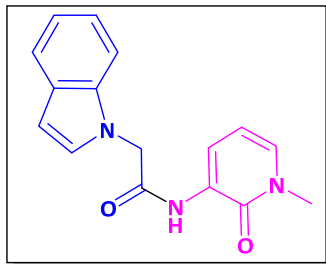

Off white solid, 81% yield. Mp 132-134 °C;  $^1\text{H}$  NMR (400 MHz, DMSO- $d_6$ ):  $\delta$  9.43 (s, 1H), 8.17 (d,  $J$  = 7.2 Hz, 1H), 7.56 (d,  $J$  = 7.8 Hz, 1H), 7.43-7.38 (m, 3H), 7.12 (t,  $J$  = 7.4 Hz, 1H), 7.03 (t,  $J$  = 7.3 Hz, 1H), 6.49-6.48 (m, 1H), 6.21 (t,  $J$  = 7.1 Hz, 1H), 5.20 (s, 2H), 3.48 (s, 3H);  $^{13}\text{C}\{^1\text{H}\}$  NMR (100 MHz, DMSO- $d_6$ ):  $\delta$  167.4, 156.7, 136.2, 132.6, 129.6, 128.0, 127.9, 122.3, 121.2, 120.3, 119.1, 109.6, 104.8, 101.1, 49.1, 37.0; HRMS-ESI (m/z): calcd for  $\text{C}_{16}\text{H}_{15}\text{N}_3\text{NaO}_2$   $[\text{M} + \text{Na}]^+$  304.1062, found 304.1066.

**N-(1-ethyl-2-oxo-3-pyridyl)-2-phenylacetamide (1s).**

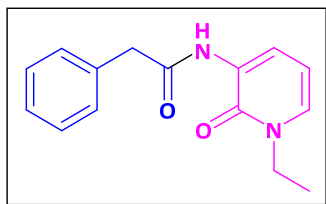

Off white solid, 71% yield. Mp 96-98 °C;  $^1\text{H}$  NMR (400 MHz, DMSO- $d_6$ ):  $\delta$  9.30 (s, 1H), 8.17 (d,  $J$  = 7.2 Hz, 1H), 7.40 (d,  $J$  = 6.7 Hz, 1H), 7.33-7.24 (m, 5H), 6.23 (t,  $J$  = 7.0 Hz, 1H), 3.95 (q,  $J$  = 14.0, 7.0 Hz, 2H), 3.79 (s, 2H), 1.22 (t,  $J$  = 6.8 Hz, 3H);  $^{13}\text{C}\{^1\text{H}\}$  NMR (100 MHz, DMSO- $d_6$ ):  $\delta$  169.8, 156.1, 135.7, 131.1, 129.1, 128.5, 128.2, 126.5, 122.1, 105.2, 44.1, 42.9, 14.2; HRMS-ESI (m/z): calcd for  $\text{C}_{15}\text{H}_{16}\text{N}_2\text{NaO}_2$   $[\text{M} + \text{Na}]^+$  279.1109, found 279.1102.

**N-(1-ethyl-2-oxo-3-pyridyl)-2-(2-fluorophenyl)acetamide (1t).**

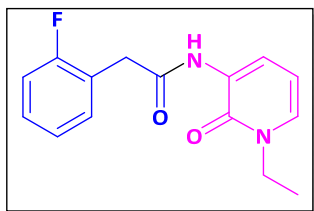

Off white solid, 56% yield. Mp 116-118 °C;  $^1\text{H}$  NMR (400 MHz, DMSO- $d_6$ ):  $\delta$  9.36 (s, 1H), 8.16 (d,  $J$  = 7.0 Hz, 1H), 7.41-7.29 (m, 3H), 7.19-7.15 (m, 2H), 6.24 (t,  $J$  = 7.04 Hz, 1H), 3.97 (q,  $J$  = 14.1, 7.0 Hz, 2H), 3.87 (s, 2H), 1.23 (t,  $J$  = 7.0 Hz, 3H);  $^{13}\text{C}\{^1\text{H}\}$  NMR (100 MHz, DMSO- $d_6$ ):  $\delta$  168.8, 160.6 (d,  $J_{\text{C-F}}$  = 242.8 Hz), 156.2, 131.9 (d,  $J_{\text{C-F}}$  = 4.3 Hz), 131.1, 128.8 (d,  $J_{\text{C-F}}$  = 8.0 Hz), 128.5, 124.2 (d,  $J_{\text{C-F}}$  = 3.2 Hz), 122.7 (d,  $J_{\text{C-F}}$  = 15.9 Hz), 122.1, 115.0 (d,  $J_{\text{C-F}}$  = 21.3 Hz), 105.2, 44.2, 36.4, 14.2;  $^{19}\text{F}$  NMR (470 MHz, DMSO- $d_6$ )  $\delta$  -117.03 (s, 1F); HRMS-ESI (m/z): calcd for  $\text{C}_{15}\text{H}_{16}\text{FN}_2\text{O}_2$   $[\text{M} + \text{H}]^+$

275.1196, found 275.1208.

### 2-(2-fluorophenyl)-N-(1-isopropyl-2-oxo-3-pyridyl)acetamide (1u).

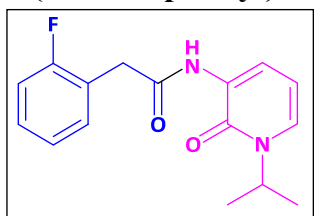

Off white solid, 60% yield. Mp 86-88 °C;  $^1\text{H}$  NMR (400 MHz, DMSO- $d_6$ ):  $\delta$  9.35 (s, 1H), 8.15 (d,  $J = 6.1$  Hz, 1H), 7.45 (d,  $J = 5.6$  Hz, 1H), 7.39-7.29 (m, 2H), 7.20-7.15 (m, 2H), 6.28 (t,  $J = 7.1$  Hz, 1H), 5.11-5.08 (m, 1H), 3.87 (s, 2H), 1.30 (d,  $J = 3.4$  Hz, 6H);  $^{13}\text{C}\{^1\text{H}\}$  NMR (100 MHz, DMSO- $d_6$ ):  $\delta$  168.7, 160.5 (d,  $J_{\text{C-F}} = 242.9$  Hz), 155.9, 131.9 (d,  $J_{\text{C-F}} = 4.2$  Hz), 128.8 (d,  $J_{\text{C-F}} = 8.0$  Hz), 128.2, 127.0, 124.2 (d,  $J_{\text{C-F}} = 3.2$  Hz), 122.6 (d,  $J_{\text{C-F}} = 15.9$  Hz), 121.5, 115.0 (d,  $J_{\text{C-F}} = 21.4$  Hz), 105.5, 46.9, 36.5, 21.0;  $^{19}\text{F}$  NMR (400 MHz, DMSO- $d_6$ )  $\delta$  -117.0 (s, 1F); HRMS-ESI (m/z): calcd for  $\text{C}_{16}\text{H}_{18}\text{FN}_2\text{O}_2$  [ $\text{M} + \text{H}$ ] $^+$  289.1352, found 289.1352.

### 2-([1,1'-biphenyl]-2-yl)-N-(1-methyl-2-oxo-1,2-dihydropyridin-3-yl)acetamide (1v).

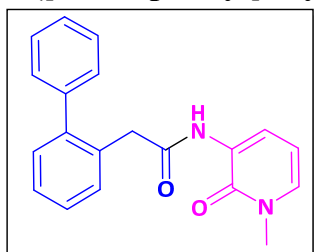

Off white solid, 77% yield. Mp 138-140 °C;  $^1\text{H}$  NMR (400 MHz, DMSO- $d_6$ ):  $\delta$  9.06 (s, 1H), 8.12 (d,  $J = 7.1$  Hz, 1H), 7.41-7.32 (m, 9H), 7.25-7.24 (m, 1H), 6.20 (t,  $J = 7.0$  Hz, 1H), 3.74 (s, 2H), 3.47 (s, 3H);  $^{13}\text{C}\{^1\text{H}\}$  NMR (100 MHz, DMSO- $d_6$ ):  $\delta$  169.9, 156.7, 141.9, 140.6, 132.7, 132.2, 130.4, 129.8, 128.8, 128.2, 127.4, 126.9, 126.8, 121.9, 104.8, 40.8, 36.9; HRMS-ESI (m/z): calcd for  $\text{C}_{20}\text{H}_{18}\text{N}_2\text{O}_2\text{Na}$  [ $\text{M} + \text{Na}$ ] $^+$  341.1266, found 341.1266.

## 4. Characterization data of products:

### 2-(2-fluorophenyl-6-d)-N-(1-methyl-2-oxo-1,2-dihydropyridin-3-yl)acetamide (2a).

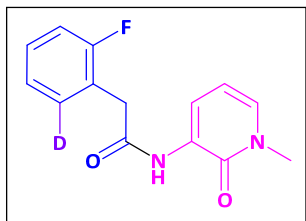

Off white solid, 80% yield. Mp 120-122 °C;  $^1\text{H}$  NMR (400 MHz, DMSO- $d_6$ ):  $\delta$  9.36 (s, 1H), 8.17 (d,  $J = 8.0$  Hz, 1H), 7.41-7.39 (m, 1H), 7.35-7.29 (m, 1H), 7.20-7.15 (m, 1H),

6.22 (t,  $J = 8.0$  Hz, 1H), 3.87 (s, 2H), 3.50 (s, 3H);  $^{13}\text{C}\{^1\text{H}\}$  NMR (100 MHz, DMSO- $d_6$ ):  $\delta$  168.8, 160.5 (d,  $J_{C-F} = 242.9$  Hz), 156.8, 132.3, 131.6 (t,  $J_{C-D} = 21.0$  Hz), 128.8 (d,  $J_{C-F} = 8.0$  Hz), 128.3, 124.1 (d,  $J_{C-F} = 3.2$  Hz), 122.6 (d,  $J_{C-F} = 15.9$  Hz), 122.2, 115.0 (d,  $J_{C-F} = 21.0$  Hz), 104.8, 37.0, 36.3;  $^{19}\text{F}$  NMR (376 MHz, DMSO- $d_6$ )  $\delta$  -117.06 to -117.10 (m, 1F); HRMS-ESI (m/z): calcd for  $\text{C}_{14}\text{H}_{12}\text{DFN}_2\text{O}_2\text{Na}$   $[\text{M} + \text{Na}]^+$  284.0922, found 284.0909.

**N-(1-methyl-2-oxo-1,2-dihydropyridin-3-yl)-2-(2-methylphenyl-6-d)acetamide (2b).**

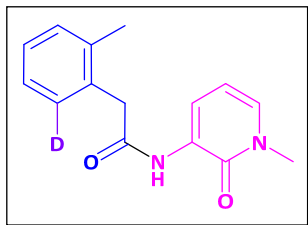

Off white solid, 91% yield. Mp 128-130 °C;  $^1\text{H}$  NMR (400 MHz, DMSO- $d_6$ ):  $\delta$  9.15 (s, 1H), 8.20-8.18 (m, 1H), 7.39-7.37 (m, 1H), 7.18-7.15 (m, 3H), 6.22 (t,  $J = 6.0$  Hz, 1H), 3.83 (s, 2H), 3.48 (s, 3H), 2.26 (s, 3H);  $^{13}\text{C}\{^1\text{H}\}$  NMR (100 MHz, DMSO- $d_6$ ):  $\delta$  169.7, 156.7, 136.6, 134.1, 132.2, 129.9, 129.8 (t,  $J_{C-D} = 24.0$  Hz), 128.3, 126.8, 125.7, 121.9, 104.9, 41.0, 37.0, 19.1; HRMS-ESI (m/z): calcd for  $\text{C}_{15}\text{H}_{16}\text{DN}_2\text{O}_2$   $[\text{M} + \text{H}]^+$  258.1353, found 258.1413.

**2-(2-chlorophenyl-6-d)-N-(1-methyl-2-oxo-1,2-dihydropyridin-3-yl)acetamide (2c).**

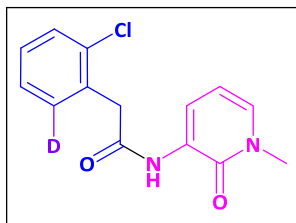

Off white solid, 86% yield. Mp 142-144 °C;  $^1\text{H}$  NMR (400 MHz, DMSO- $d_6$ ):  $\delta$  9.30 (s, 1H), 8.18-8.16 (m, 1H), 7.46-7.44 (m, 1H), 7.40-7.39 (m, 1H), 7.32-7.29 (m, 2H), 6.22 (t,  $J = 8.0$  Hz, 1H), 3.96 (s, 2H), 3.49 (s, 3H);  $^{13}\text{C}\{^1\text{H}\}$  NMR (100 MHz, DMSO- $d_6$ ):  $\delta$  168.5, 156.7, 133.6, 133.5, 132.2, 132.0 (t,  $J_{C-D} = 24.0$  Hz), 129.0, 128.6, 128.3, 127.0, 122.0, 104.8, 40.9, 36.9; HRMS-ESI (m/z): calcd for  $\text{C}_{14}\text{H}_{13}\text{DCIN}_2\text{O}_2$   $[\text{M} + \text{H}]^+$  278.0807, found 278.0802.

**2-(2-methoxyphenyl-6-d)-N-(1-methyl-2-oxo-1,2-dihydropyridin-3-yl)acetamide(2d).**

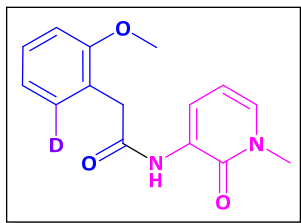

Off white solid, 80% yield. Mp 116-118 °C;  $^1\text{H}$  NMR (400 MHz, DMSO- $d_6$ ):  $\delta$  9.04 (s, 1H), 8.15 (d,  $J$  = 8.0 Hz, 1H), 7.39-7.35 (m, 1H), 7.28 (t,  $J$  = 8.0 Hz, 1H), 7.25-7.23 (m, 0.23H), 7.03 (d,  $J$  = 8.0 Hz, 1H), 6.93 (d,  $J$  = 8.0 Hz, 1H), 6.21 (t,  $J$  = 8.0 Hz, 1H), 3.83 (s, 3H), 3.70 (s, 2H), 3.48 (s, 3H);  $^{13}\text{C}\{^1\text{H}\}$  NMR (100 MHz, DMSO- $d_6$ ):  $\delta$  169.5, 156.8, 156.7, 131.9, 130.6 (t,  $J_{C-D}$  = 21.0 Hz), 128.5, 128.4, 123.2, 121.2, 120.3, 110.8, 105.0, 55.4, 40.0, 37.0; HRMS-ESI ( $m/z$ ): calcd for  $\text{C}_{15}\text{H}_{16}\text{DN}_2\text{O}_3$  [ $\text{M} + \text{H}$ ] $^+$  274.1302, found 274.1298.

**N-(1-methyl-2-oxo-1,2-dihydropyridin-3-yl)-2-(phenyl-2,6- $d_2$ )acetamide (2e).**

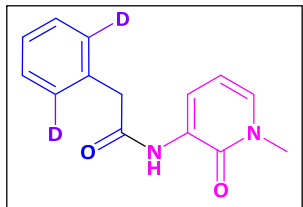

Off white solid, 84% yield. Mp 132-134 °C;  $^1\text{H}$  NMR (400 MHz, DMSO- $d_6$ ):  $\delta$  9.31 (s, 1H), 8.18 (d,  $J$  = 7.0 Hz, 1H), 7.39 (d,  $J$  = 6.0 Hz, 1H), 7.33-7.31 (m, 2H), 7.26-7.22 (m, 1H), 6.21 (t,  $J$  = 7.0 Hz, 1H), 3.79 (s, 2H), 3.48 (s, 3H);  $^{13}\text{C}\{^1\text{H}\}$  NMR (100 MHz, DMSO- $d_6$ ):  $\delta$  169.9, 156.8, 135.5, 132.3, 128.8 (t,  $J_{C-D}$  = 24 Hz), 128.6, 128.1, 126.5, 122.2, 104.8, 42.8, 37.0; HRMS-ESI ( $m/z$ ): calcd for  $\text{C}_{14}\text{H}_{13}\text{D}_2\text{N}_2\text{O}_2$  [ $\text{M} + \text{H}$ ] $^+$  245.1259, found 245.1257.

**N-(1-methyl-2-oxo-1,2-dihydropyridin-3-yl)-2-(3-methylphenyl-2,6- $d_2$ )acetamide (2f).**

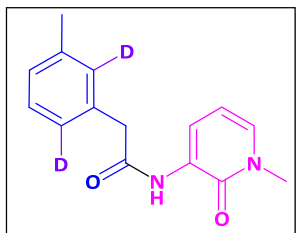

Off white solid, 93% yield. Mp 118-120 °C;  $^1\text{H}$  NMR (400 MHz, DMSO- $d_6$ , 100°C):  $\delta$  8.86 (s, 1H), 8.15-8.14 (m, 1H), 7.29-7.20 (m, 2H), 7.15 (m, 0.12H), 7.08-7.06 (m, 1H), 6.18 (m, 1H), 3.73 (s, 2H), 3.50 (s, 3H), 2.31 (s, 3H);  $^{13}\text{C}\{^1\text{H}\}$  NMR (100 MHz, DMSO- $d_6$ ):  $\delta$  170.0, 156.8, 137.2, 135.4, 132.3, 129.5 (t,  $J_{C-D}$  = 21.0 Hz), 128.4, 128.0, 127.1, 125.9 (t,  $J_{C-D}$  = 24.0 Hz), 122.1, 104.8, 42.8, 37.0, 20.8; HRMS-ESI ( $m/z$ ): calcd for  $\text{C}_{15}\text{H}_{15}\text{D}_2\text{N}_2\text{O}_2$  [ $\text{M} + \text{H}$ ] $^+$  259.1416, found 259.1414.

**2-(3-fluorophenyl-2,6- $d_2$ )-N-(1-methyl-2-oxo-1,2-dihydropyridin-3-yl)acetamide (2g).**

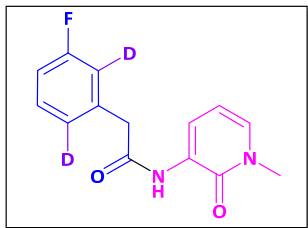

Off white solid, 83% yield. Mp 118-120 °C;  $^1\text{H}$  NMR (400 MHz, DMSO- $d_6$ ):  $\delta$  9.41 (s, 1H), 8.19-8.17 (m, 1H), 7.40-7.34 (m, 2H), 7.16-7.14 (m, 0.12H), 7.10-7.06 (m, 1H), 6.21 (t,  $J = 6.0$  Hz, 1H), 3.84 (s, 2H), 3.49 (s, 3H);  $^{13}\text{C}\{^1\text{H}\}$  NMR (100 MHz, DMSO- $d_6$ ):  $\delta$  169.4, 161.9 (d,  $J_{C-F} = 241.7$  Hz), 156.8, 138.3 (d,  $J_{C-F} = 7.8$  Hz), 132.4, 130.0 (d,  $J_{C-F} = 8.5$  Hz), 128.3, 125.0 (t,  $J_{C-D} = 26.0$  Hz), 122.5, 115.8 (t,  $J_{C-D} = 21.0$  Hz), 113.3 (d,  $J_{C-F} = 20.6$  Hz), 104.8, 42.3, 37.0;  $^{19}\text{F}$  NMR (376 MHz, DMSO- $d_6$ )  $\delta$  -113.91 to -113.95 (m, 1F); HRMS-ESI (m/z): calcd for  $\text{C}_{14}\text{H}_{12}\text{D}_2\text{FN}_2\text{O}_2$   $[\text{M} + \text{H}]^+$  263.1165, found 263.1192.

**N-(1-methyl-2-oxo-1,2-dihydropyridin-3-yl)-2-(4-methylphenyl-2,6-d2)acetamide (2h).**

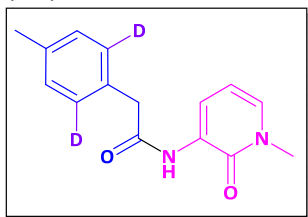

Off white solid, 78% yield. Mp 132-134 °C;  $^1\text{H}$  NMR (400 MHz, DMSO- $d_6$ ):  $\delta$  9.22 (s, 1H), 8.18-8.17 (m, 1H), 7.39-7.37 (m, 1H), 7.13 (s, 2H), 6.21 (t,  $J = 8.0$  Hz, 1H), 3.73 (s, 2H), 3.48 (s, 3H), 2.27 (s, 3H);  $^{13}\text{C}\{^1\text{H}\}$  NMR (100 MHz, DMSO- $d_6$ ):  $\delta$  170.1, 156.8, 135.5, 132.3, 132.2, 128.7, 128.6 (t,  $J_{C-D} = 24.0$  Hz), 128.3, 122.0, 104.8, 42.5, 36.9, 20.5; HRMS-ESI (m/z): calcd for  $\text{C}_{15}\text{H}_{15}\text{D}_2\text{N}_2\text{O}_2$   $[\text{M} + \text{H}]^+$  259.1416, found 259.1413.

**2-(4-fluorophenyl-2,6-d2)-N-(1-methyl-2-oxo-1,2-dihydropyridin-3-yl)acetamide (2i).**

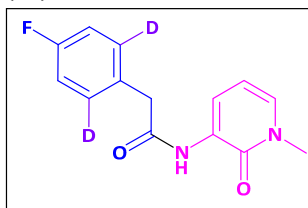

Off white solid, 76% yield. Mp 148-150 °C;  $^1\text{H}$  NMR (400 MHz, DMSO- $d_6$ ):  $\delta$  9.35 (s, 1H), 8.19-8.17 (m, 1H), 7.40-7.38 (m, 1.15H), 7.15-7.13 (m, 2H), 6.21 (t,  $J = 8.0$  Hz, 1H), 3.79 (s, 2H), 3.49 (s, 3H);  $^{13}\text{C}\{^1\text{H}\}$  NMR (100 MHz, DMSO- $d_6$ ):  $\delta$  169.9, 161.0 (d,  $J_{C-F} = 240.5$  Hz), 156.8, 132.4, 131.7 (d,  $J_{C-F} = 2.9$  Hz), 130.7 (td,  $J_{C-D} = 30.0, 8.0$  Hz), 128.4, 122.3, 114.8 (d,  $J_{C-F} = 21.0$  Hz), 104.8, 41.8, 37.0;  $^{19}\text{F}$  NMR (470 MHz, DMSO- $d_6$ )  $\delta$  -116.4 (s, 1F); HRMS-ESI (m/z): calcd for  $\text{C}_{14}\text{H}_{12}\text{D}_2\text{FN}_2\text{O}_2$   $[\text{M} + \text{H}]^+$  263.1165,

found 263.1157.

**2-(2,4-difluorophenyl-6-d)-N-(1-methyl-2-oxo-1,2-dihydropyridin-3-yl)acetamide (2j).**

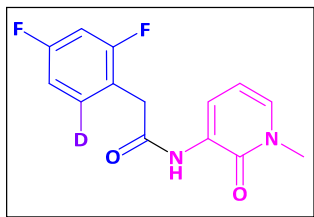

Off white solid, 78% yield. Mp 142-144 °C;  $^1\text{H}$  NMR (400 MHz, DMSO- $d_6$  at 100°C):  $\delta$  9.05 (s, 1H), 8.13 (m, 1H), 7.46-7.44 (m, 0.23H), 7.34-7.32 (m, 1H), 7.12 (t,  $J = 8.0$  Hz, 1H), 7.04-7.02 (m, 1H), 6.20 (t,  $J = 8.0$  Hz, 1H), 3.84 (s, 2H), 3.52 (s, 3H);  $^{13}\text{C}\{^1\text{H}\}$  NMR (100 MHz, DMSO- $d_6$ ):  $\delta$  168.6, 161.2 (dd,  $J_{C-F} = 241.9, 10.8$  Hz), 160.5 (dd,  $J_{C-F} = 245.4, 12.1$  Hz), 156.8, 132.6 (t,  $J_{C-D} = 22.0$  Hz), 132.3, 128.3, 122.3, 118.9 (dd,  $J_{C-F} = 16.1, 4.0$  Hz), 111.1 (dd,  $J_{C-F} = 20.9, 3.5$  Hz), 104.8, 103.5 (t,  $J_{C-F} = 25.8$  Hz), 37.0, 35.7;  $^{19}\text{F}$  NMR (376 MHz, DMSO- $d_6$ )  $\delta$  -112.1 (d,  $J = 7.0$  Hz, 1F), -112.5 (d,  $J = 7.0$  Hz, 1F); HRMS-ESI (m/z): calcd for  $\text{C}_{14}\text{H}_{11}\text{DF}_2\text{N}_2\text{O}_2\text{Na}$  [ $\text{M} + \text{Na}$ ] $^+$  302.0827, found 302.0835.

**N-(1-methyl-2-oxo-1,2-dihydropyridin-3-yl)-2-(thiophen-2-yl-3-d)acetamide (2m).**

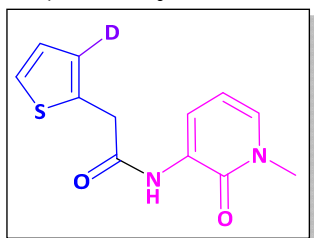

Off white solid, 72% yield. Mp 146-148 °C;  $^1\text{H}$  NMR (400 MHz, DMSO- $d_6$ , 100°C):  $\delta$  9.06 (s, 1H), 8.16 (d,  $J = 8.0$  Hz, 1H), 7.37-7.36 (m, 0.37H), 7.33-7.31 (d,  $J = 8.0$  Hz, 1H), 7.00 (d,  $J = 8.0$  Hz, 2H), 6.20 (t,  $J = 6.0$  Hz, 1H), 4.02 (s, 2H), 3.51 (s, 3H);  $^{13}\text{C}\{^1\text{H}\}$  NMR (100 MHz, DMSO- $d_6$ ):  $\delta$  168.8, 156.8, 136.8, 132.4, 128.2, 126.6, 126.5, 125.1 (t,  $J_{C-D} = 24.0$  Hz), 122.3, 104.8, 37.1, 37.0; HRMS-ESI (m/z): calcd for  $\text{C}_{12}\text{H}_{11}\text{DN}_2\text{O}_2\text{SNa}$  [ $\text{M} + \text{Na}$ ] $^+$  272.0580, found 272.0573.

**N-(1-methyl-2-oxo-1,2-dihydropyridin-3-yl)-2-(naphthalen-1-yl-2-d)acetamide (2n).**

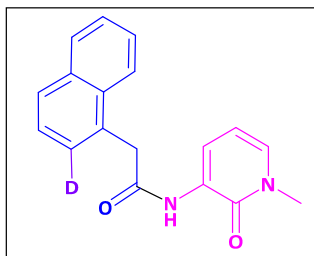

Off white solid, 88% yield. Mp 130-132 °C;  $^1\text{H}$  NMR (400 MHz, DMSO- $d_6$ ):  $\delta$  9.34 (s,

1H), 8.17-8.15 (m, 1H), 8.09 (d,  $J = 8.0$  Hz, 1H), 7.95-7.93 (m, 1H), 7.86 (d,  $J = 8.0$  Hz, 1H), 7.53-7.48 (m, 3H), 7.38-7.36 (m, 1H), 6.19 (t,  $J = 6.0$  Hz, 1H), 4.30 (s, 2H), 3.47 (s, 3H);  $^{13}\text{C}\{^1\text{H}\}$  NMR (100 MHz, DMSO- $d_6$ ):  $\delta$  169.8, 156.7, 133.3, 132.2, 131.9, 131.8, 128.4, 128.3, 127.9 (t,  $J_{C-D} = 24.0$  Hz), 127.3, 126.0, 125.6, 125.4, 124.0, 121.9, 104.8, 40.5, 36.9; HRMS-ESI (m/z): calcd for  $\text{C}_{18}\text{H}_{15}\text{DN}_2\text{O}_2\text{Na}$  [ $\text{M} + \text{Na}$ ] $^+$  316.1172, found 316.1196.

**N-(1-methyl-2-oxo-1,2-dihydropyridin-3-yl)-2-(naphthalen-2-yl-1,3-d2)acetamide (2o).**

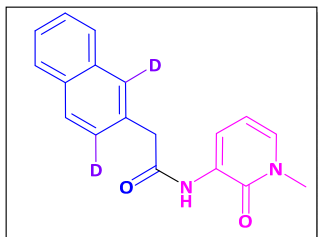

Off white solid, 74% yield. Mp 152-154 °C;  $^1\text{H}$  NMR (400 MHz, DMSO- $d_6$ ):  $\delta$  9.37 (s, 1H), 8.20 (d,  $J = 8.0$  Hz, 1H), 7.90-7.87 (m, 3H), 7.52-7.46 (m, 2H), 7.39-7.37 (m, 1H), 6.21 (t,  $J = 8.0$  Hz, 1H), 3.98 (s, 2H), 3.48 (s, 3H);  $^{13}\text{C}\{^1\text{H}\}$  NMR (100 MHz, DMSO- $d_6$ ):  $\delta$  169.9, 156.8, 133.2, 132.8, 132.3, 131.7, 128.4, 127.6 (t,  $J_{C-D} = 24.0$  Hz), 127.6, 127.4, 127.3, 127.0 (t,  $J_{C-D} = 24.0$  Hz), 126.0, 125.5, 122.2, 104.8, 43.0, 37.0; HRMS-ESI (m/z): calcd for  $\text{C}_{18}\text{H}_{15}\text{D}_2\text{N}_2\text{O}_2$  [ $\text{M} + \text{H}$ ] $^+$  295.1416, found 295.1411.

**2-(1-methyl-1H-indol-3-yl-2-d)-N-(1-methyl-2-oxo-1,2-dihydropyridin-3-yl)acetamide (2p).**

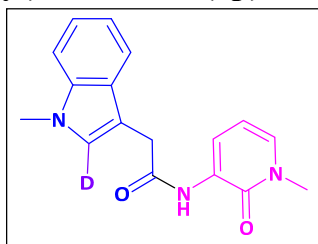

Off white solid, 82% yield. Mp 140-142 °C;  $^1\text{H}$  NMR (400 MHz, DMSO- $d_6$ ):  $\delta$  9.09 (s, 1H), 8.19 (d,  $J = 7.4$  Hz, 1H), 7.57 (d,  $J = 7.8$  Hz, 1H), 7.41 (d,  $J = 8.1$  Hz, 1H), 7.35 (d,  $J = 6.7$  Hz, 1H), 7.30 (s, 0.09H), 7.15 (t,  $J = 7.5$  Hz, 1H), 7.01 (t,  $J = 7.4$  Hz, 1H), 6.20 (t,  $J = 7.1$  Hz, 1H), 3.85 (s, 2H), 3.77 (s, 3H), 3.44 (s, 3H);  $^{13}\text{C}\{^1\text{H}\}$  NMR (100 MHz, DMSO- $d_6$ ):  $\delta$  170.3, 156.7, 136.5, 132.0, 128.3 (t,  $J_{C-D} = 22.0$  Hz), 128.3, 127.3, 121.4, 121.1, 118.7, 118.6, 109.5, 107.0, 104.9, 36.9, 33.4, 32.1; HRMS-ESI (m/z): calcd for  $\text{C}_{17}\text{H}_{17}\text{DN}_3\text{O}_2$  [ $\text{M} + \text{H}$ ] $^+$  297.1462, found 297.1455.

**2-(1-ethyl-1H-indol-3-yl-2-d)-N-(1-methyl-2-oxo-1,2-dihydropyridin-3-yl)acetamide (2q).**



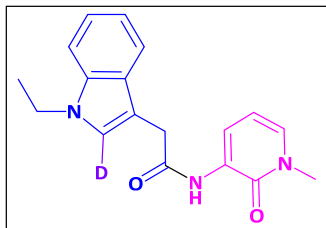

Off white solid, 69% yield. Mp 122-124 °C;  $^1\text{H}$  NMR (400 MHz, DMSO- $d_6$  at 100°C):  $\delta$  8.85 (s, 1H), 8.19-8.17 (m, 1H), 7.57 (d,  $J = 7.7$  Hz, 1H), 7.43 (d,  $J = 8.2$  Hz, 1H), 7.35 (m, 0.35H), 7.27 (d,  $J = 6.0$  Hz, 1H), 7.15 (t,  $J = 7.5$  Hz, 1H), 7.02 (t,  $J = 7.2$  Hz, 1H), 6.18 (t,  $J = 6.8$  Hz, 1H), 4.19 (q,  $J = 14.3, 7.1$  Hz, 2H), 3.85 (s, 2H), 3.45 (s, 3H), 1.40 (t,  $J = 6.4$  Hz, 3H);  $^{13}\text{C}\{^1\text{H}\}$  NMR (100 MHz, DMSO- $d_6$ ):  $\delta$  170.3, 156.7, 135.5, 132.0, 128.3, 127.4, 126.6 (t,  $J_{C-D} = 24.0$  Hz), 121.4, 121.1, 118.8, 118.5, 109.5, 107.2, 104.9, 40.0, 36.9, 33.5, 15.3; HRMS-ESI (m/z): calcd for  $\text{C}_{18}\text{H}_{19}\text{DN}_3\text{O}_2$  [M + H] $^+$  311.1618, found 311.1614.

**2-(1H-indol-1-yl-2-d)-N-(1-methyl-2-oxo-1,2-dihydropyridin-3-yl)acetamide (2r).**

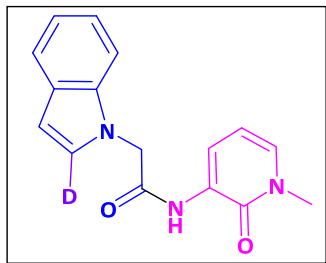

Off white solid, 90% yield. Mp 132-134 °C;  $^1\text{H}$  NMR (400 MHz, DMSO- $d_6$ ):  $\delta$  9.45 (s, 1H), 8.17 (d,  $J = 7.3$  Hz, 1H), 7.56 (d,  $J = 7.8$  Hz, 1H), 7.43-7.39 (m, 3H), 7.11 (t,  $J = 7.5$  Hz, 1H), 7.03 (t,  $J = 7.3$  Hz, 1H), 6.21 (t,  $J = 7.0$  Hz, 1H), 5.20 (s, 2H), 3.48 (s, 3H);  $^{13}\text{C}\{^1\text{H}\}$  NMR (100 MHz, DMSO- $d_6$ ):  $\delta$  167.4, 156.7, 136.2, 132.7, 129.5, 128.0, 122.3, 121.2, 120.3, 119.1, 109.6, 104.9, 101.1 (t,  $J_{C-D} = 24.0$  Hz), 49.1, 37.0; HRMS-ESI (m/z): calcd for  $\text{C}_{16}\text{H}_{15}\text{DN}_3\text{O}_2$  [M + H] $^+$  283.1305, found 283.1304.

**N-(1-ethyl-2-oxo-1,2-dihydropyridin-3-yl)-2-(phenyl-2,6-d2)acetamide (2s).**

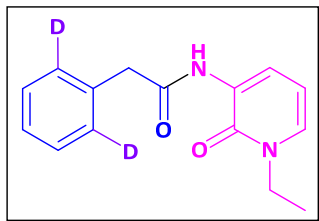

Off white solid, 89% yield. Mp 98-100 °C;  $^1\text{H}$  NMR (400 MHz, DMSO- $d_6$ ):  $\delta$  9.32 (s, 1H), 8.18-8.17 (m, 1H), 7.40 (d,  $J = 8.0$  Hz, 1H), 7.33-7.31 (m, 2H), 7.26-7.23 (m, 1H), 6.24 (t,  $J = 6.0$  Hz, 1H), 3.96 (q,  $J = 16.0, 8.0$  Hz, 2H), 3.79 (s, 2H), 1.22 (t,  $J = 8.0$  Hz, 3H);  $^{13}\text{C}\{^1\text{H}\}$  NMR (100 MHz, DMSO- $d_6$ ):  $\delta$  169.9, 156.1, 135.5, 131.1, 128.8 (t,  $J_{C-D} = 24.0$  Hz), 128.5, 128.1, 126.5, 122.1, 105.2, 44.2, 42.8, 14.2; HRMS-ESI (m/z): calcd for  $\text{C}_{15}\text{H}_{15}\text{D}_2\text{N}_2\text{O}_2$  [M + H] $^+$  259.1416, found 259.1411.

**N-(1-ethyl-2-oxo-1,2-dihydropyridin-3-yl)-2-(2-fluorophenyl-6-d)acetamide (2t).**

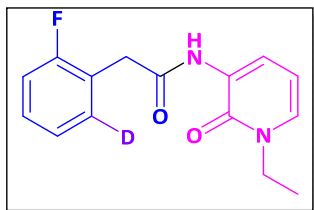

Off white solid, 80% yield. Mp 120-122 °C;  $^1\text{H}$  NMR (400 MHz, DMSO- $d_6$ ):  $\delta$  9.36 (s, 1H), 8.16 (d,  $J = 7.0$  Hz, 1H), 7.42-7.41 (m, 1H), 7.35-7.30 (m, 1H), 7.20-7.16 (m, 2H), 6.25 (t,  $J = 6.0$  Hz, 1H), 3.97 (q,  $J = 16.0, 8.0$  Hz, 2H), 3.87 (s, 2H), 1.23 (t,  $J = 8.0$  Hz, 3H);  $^{13}\text{C}\{^1\text{H}\}$  NMR (100 MHz, DMSO- $d_6$ ):  $\delta$  168.8, 160.5 (d,  $J_{C-F} = 242.8$  Hz), 156.1, 131.6 (t,  $J_{C-D} = 24.2$  Hz), 131.1, 128.8 (d,  $J_{C-F} = 8.0$  Hz), 128.5, 124.1 (d,  $J_{C-F} = 3.4$  Hz), 122.6 (d,  $J_{C-F} = 15.9$  Hz), 122.1, 115.0 (d,  $J_{C-F} = 21.3$  Hz), 105.2, 44.2, 36.4, 14.2;  $^{19}\text{F}$  NMR (470 MHz, DMSO- $d_6$ )  $\delta$  -117.09 (s, 1F); HRMS-ESI (m/z): calcd for  $\text{C}_{15}\text{H}_{15}\text{DFN}_2\text{O}_2$  [ $\text{M} + \text{H}$ ] $^+$  276.1259, found 276.1258.

**2-(2-fluorophenyl-6-d)-N-(1-isopropyl-2-oxo-1,2-dihydropyridin-3-yl)acetamide (2u).**

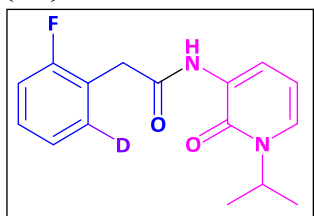

Off white solid, 83% yield. Mp 90-92 °C;  $^1\text{H}$  NMR (400 MHz, DMSO- $d_6$ ):  $\delta$  9.34 (s, 1H), 8.16-8.13 (m, 1H), 7.46-7.44 (m, 1H), 7.33-7.31 (m, 1H), 7.20-7.16 (m, 2H), 6.29 (t,  $J = 8.0$  Hz, 1H), 5.11-5.08 (m, 1H), 3.87 (s, 2H), 1.31 (d,  $J = 4.0$  Hz, 6H);  $^{13}\text{C}\{^1\text{H}\}$  NMR (100 MHz, DMSO- $d_6$ ):  $\delta$  168.7, 160.5 (d,  $J_{C-F} = 241.7$  Hz), 155.9, 131.6 (t,  $J_{C-D} = 23.1$  Hz), 128.8 (d,  $J_{C-F} = 8.0$  Hz), 128.2, 127.0, 124.1 (d,  $J_{C-F} = 3.2$  Hz), 122.6 (d,  $J_{C-F} = 17.1$  Hz), 121.5, 115.0 (d,  $J_{C-F} = 21.3$  Hz), 105.5, 46.9, 36.4, 21.0;  $^{19}\text{F}$  NMR (400 MHz, DMSO- $d_6$ )  $\delta$  -117.0 (s, 1F); HRMS-ESI (m/z): calcd for  $\text{C}_{16}\text{H}_{17}\text{DFN}_2\text{O}_2$  [ $\text{M} + \text{H}$ ] $^+$  290.1415, found 290.1413.

**2-([1,1'-biphenyl]-2-yl-3-d)-N-(1-methyl-2-oxo-1,2-dihydropyridin-3-yl)acetamide (2v).**

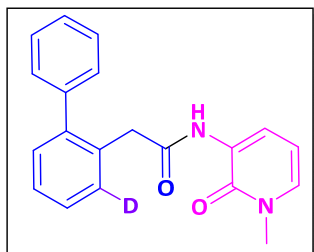

Off white solid, 85% yield. Mp 140-142 °C;  $^1\text{H}$  NMR (400 MHz, DMSO- $d_6$ ):  $\delta$  9.04 (s,

1H), 8.12 (d,  $J = 6.8$  Hz, 1H), 7.42-7.31 (m, 8H), 7.25-7.23 (m, 1H), 6.20 (t,  $J = 6.94$  Hz, 1H), 3.74 (s, 2H), 3.47 (s, 3H);  $^{13}\text{C}\{^1\text{H}\}$  NMR (100 MHz, DMSO- $d_6$ ):  $\delta$  169.9, 156.8, 141.9, 140.6, 132.7, 132.3, 130.3 (t,  $J_{C-D} = 24.0$  Hz), 129.8, 128.8, 128.3, 128.1, 127.4, 127.0, 126.9, 122.0, 104.9, 40.8, 37.0; HRMS-ESI ( $m/z$ ): calcd for  $\text{C}_{20}\text{H}_{17}\text{N}_2\text{O}_2\text{DNa}$   $[\text{M} + \text{Na}]^+$  342.1329, found 342.1321.

**2-([1,1'-biphenyl]-2-yl-3-d)acetic acid (3).**

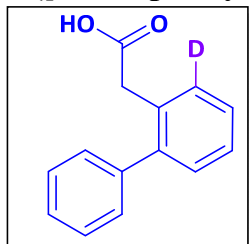

Off white solid, 70% yield. Mp 106-108 °C;  $^1\text{H}$  NMR (400 MHz, DMSO- $d_6$ ):  $\delta$  12.25 (br, 1H), 7.46-7.41 (m, 2H), 7.39-7.26 (m, 5H), 7.23-7.19 (m, 1H), 3.49 (s, 2H);  $^{13}\text{C}\{^1\text{H}\}$  NMR (100 MHz, DMSO- $d_6$ ):  $\delta$  172.7, 141.7, 140.7, 132.2, 130.4 (t,  $J_{C-D} = 25.0$  Hz), 129.5, 128.7, 128.1, 127.1, 127.0, 126.7, 38.3; HRMS-ESI ( $m/z$ ): calcd for  $\text{C}_{14}\text{H}_{11}\text{O}_2\text{D}$   $[\text{M} + \text{H}]^+$  214.0978, found 214.0979.

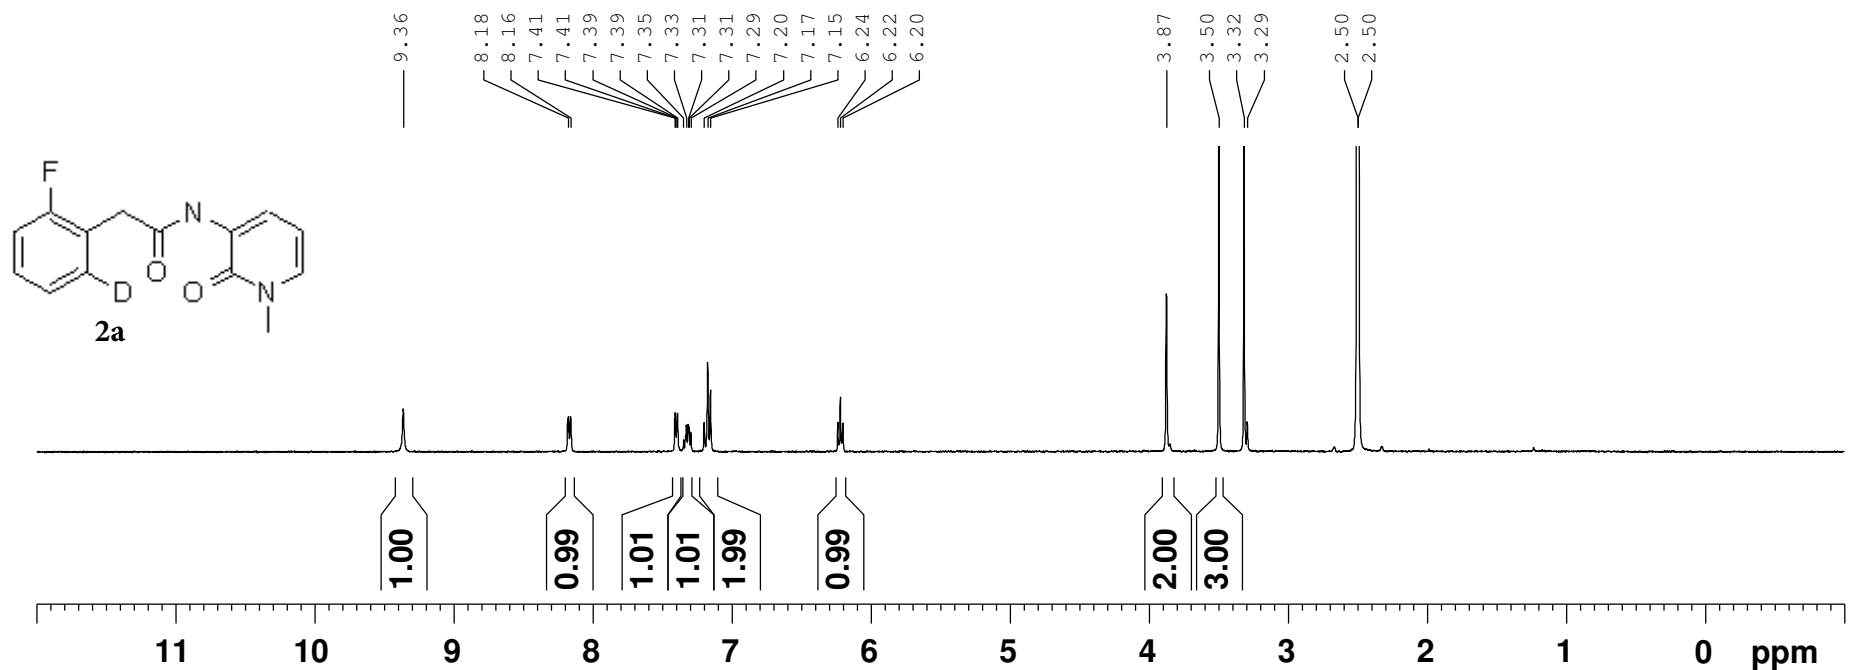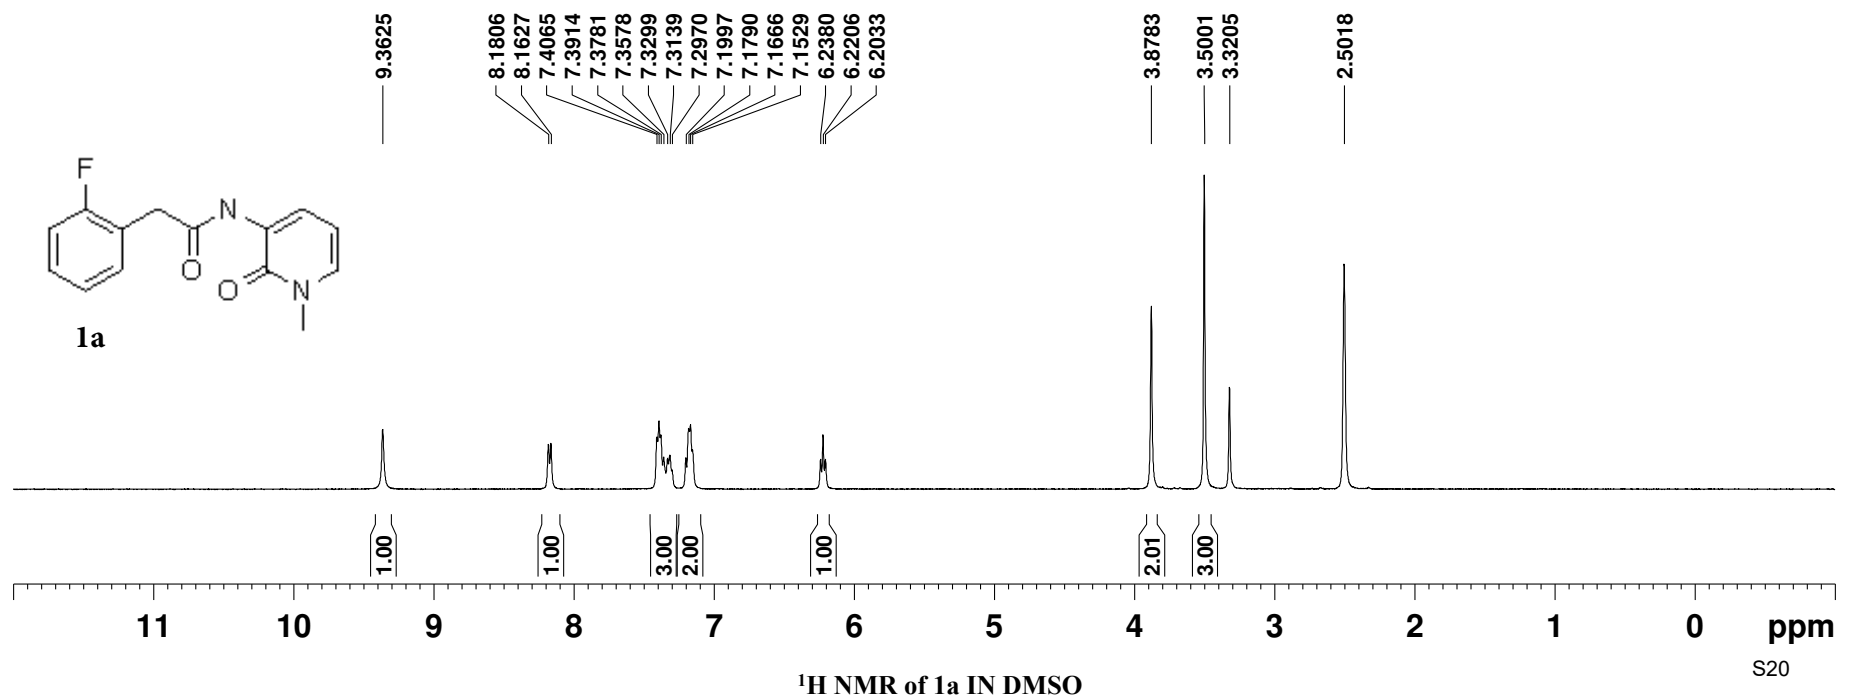

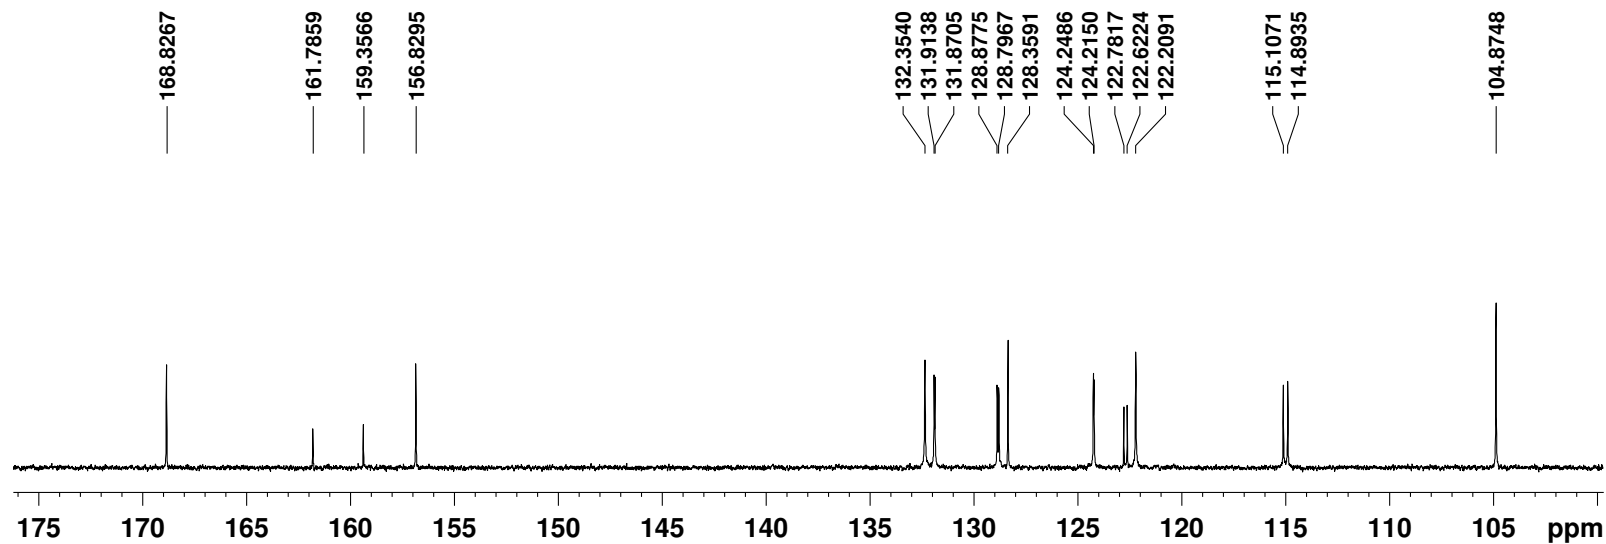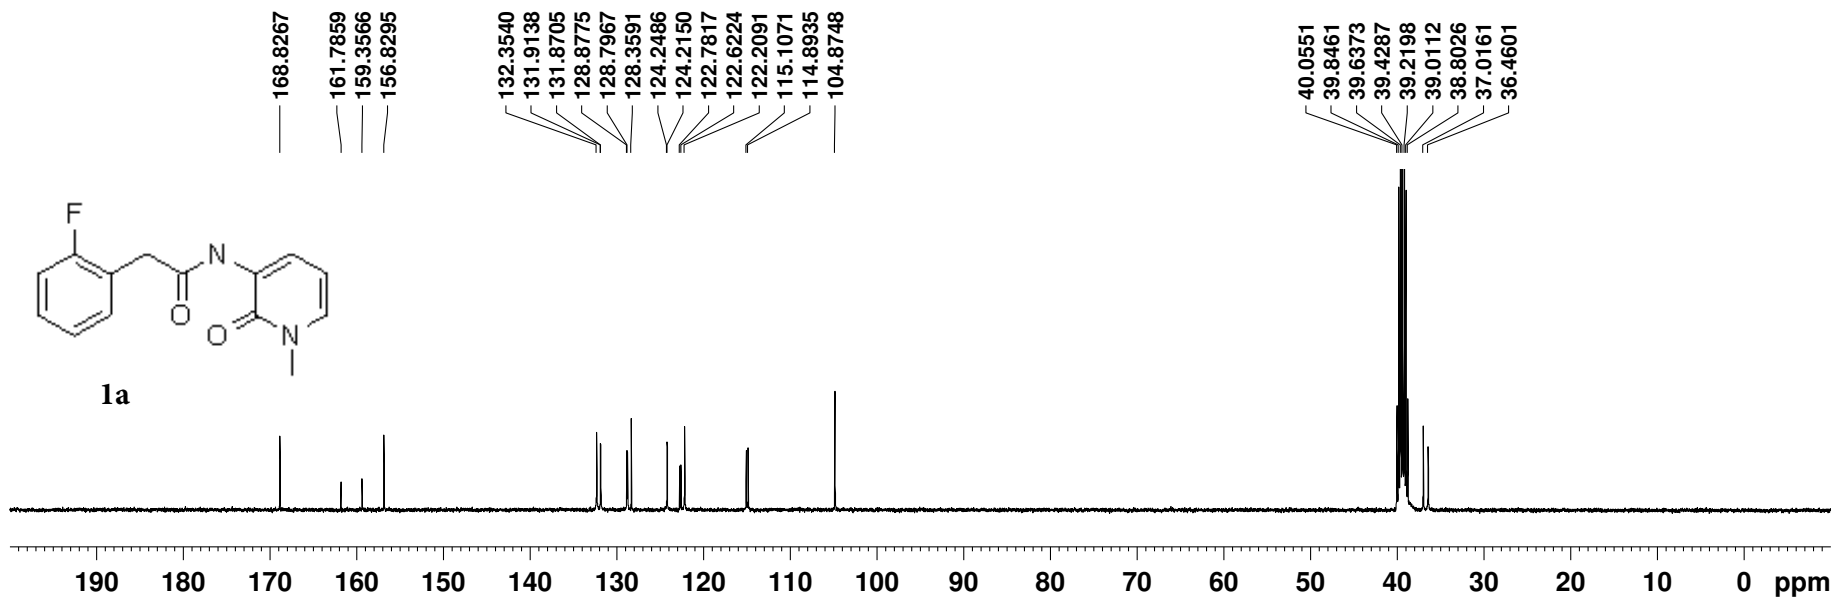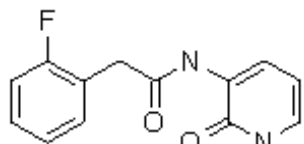

1a

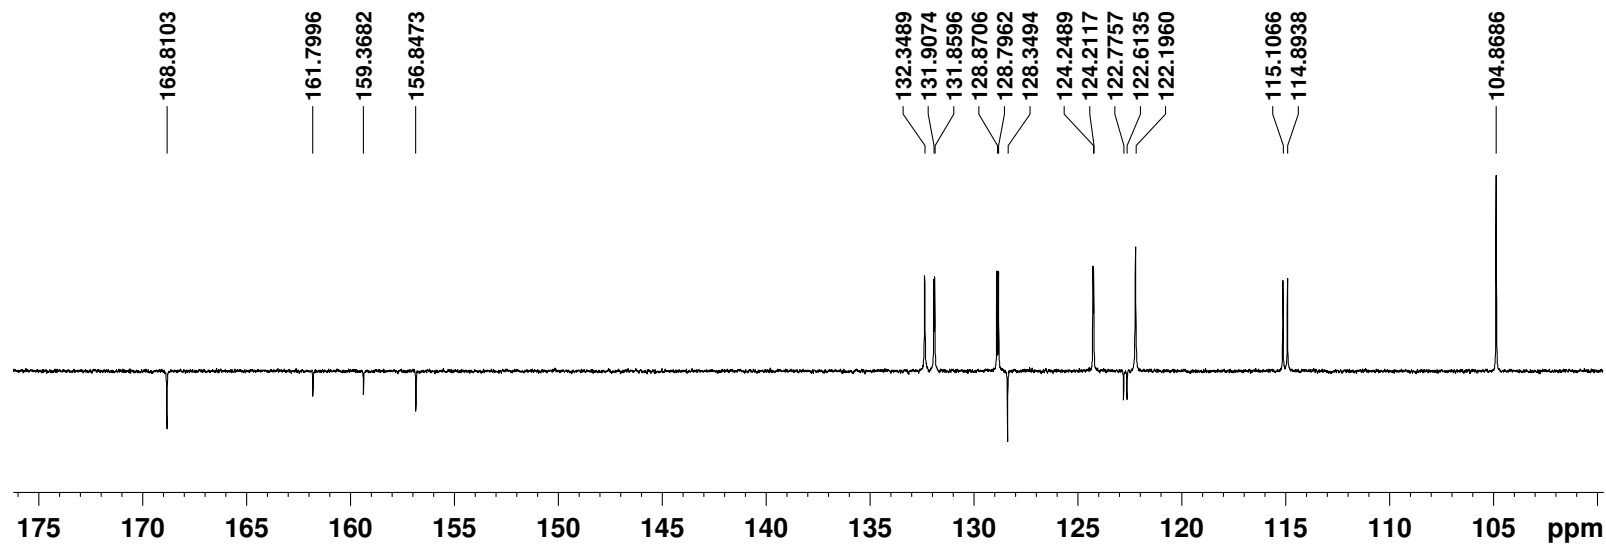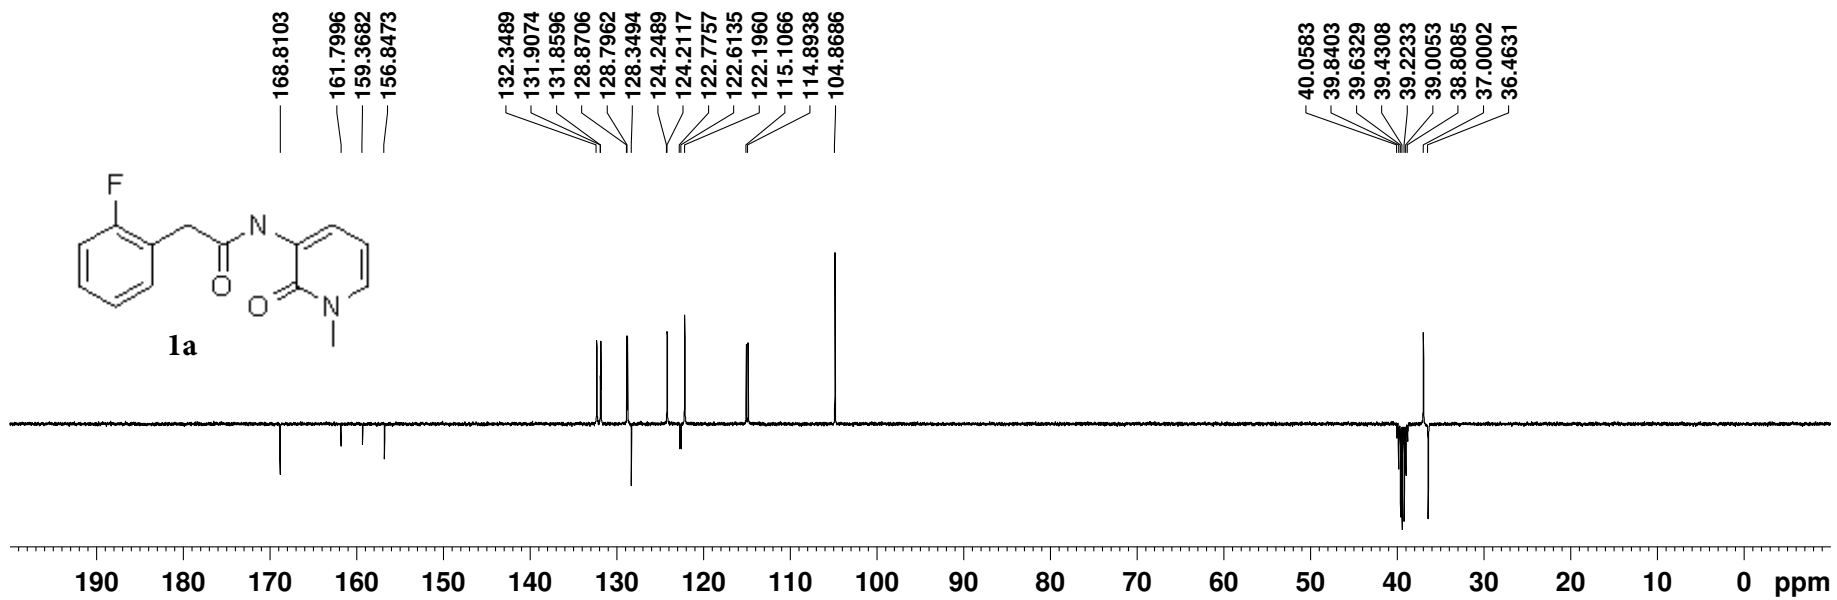

APT of 1a IN DMSO

-116.9994  
-117.0186  
-117.0412  
-117.0612

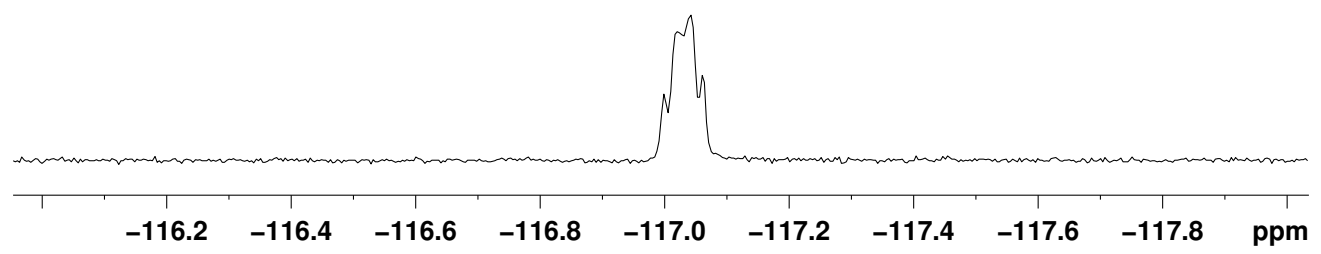

-116.9994  
-117.0186  
-117.0412  
-117.0612

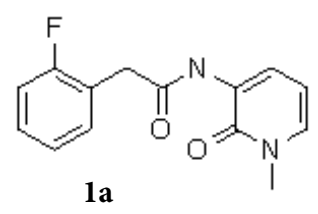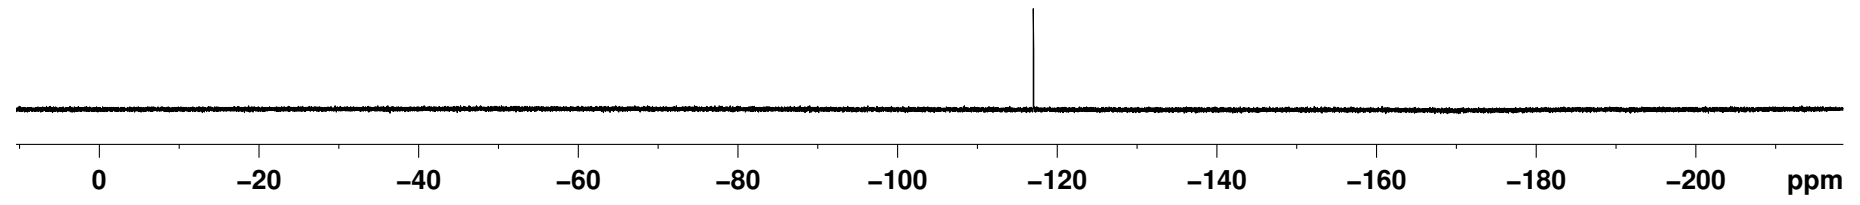

<sup>19</sup>F NMR of 1a IN DMSO (PC)

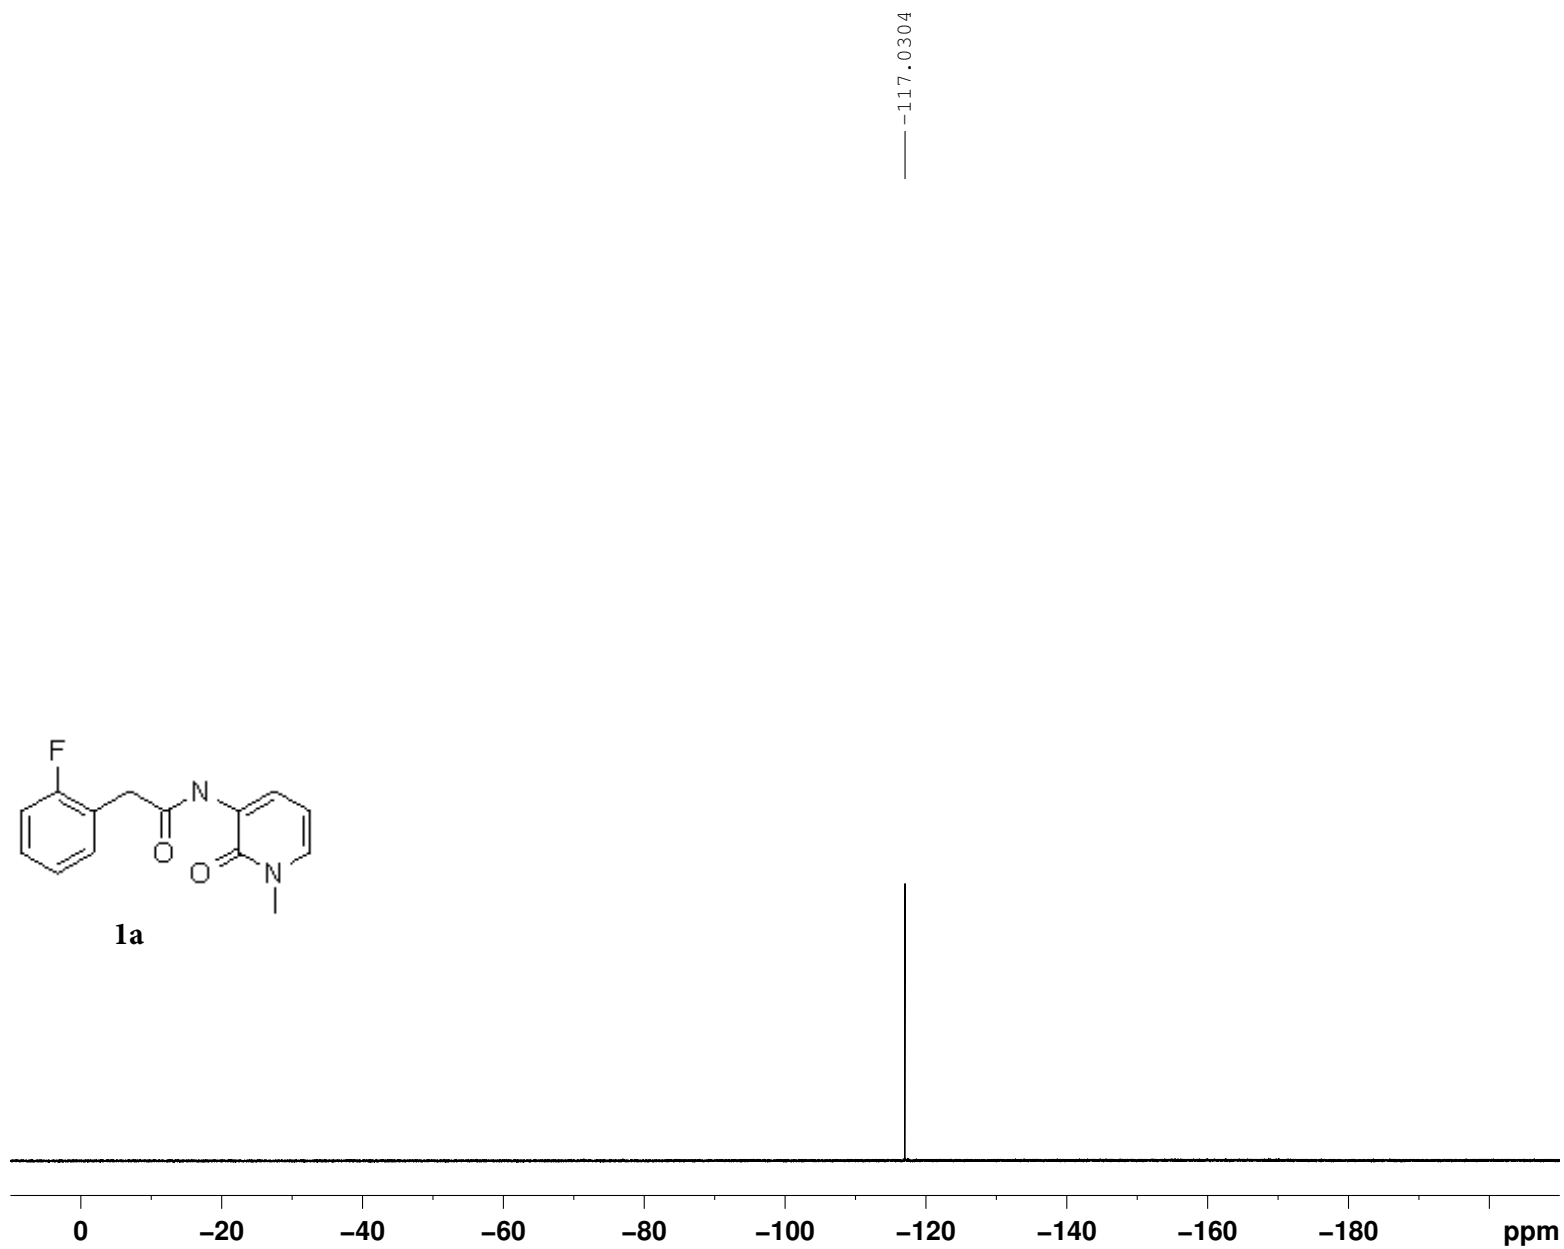

$^{19}\text{F}$  NMR of **1a** IN DMSO (PDC)



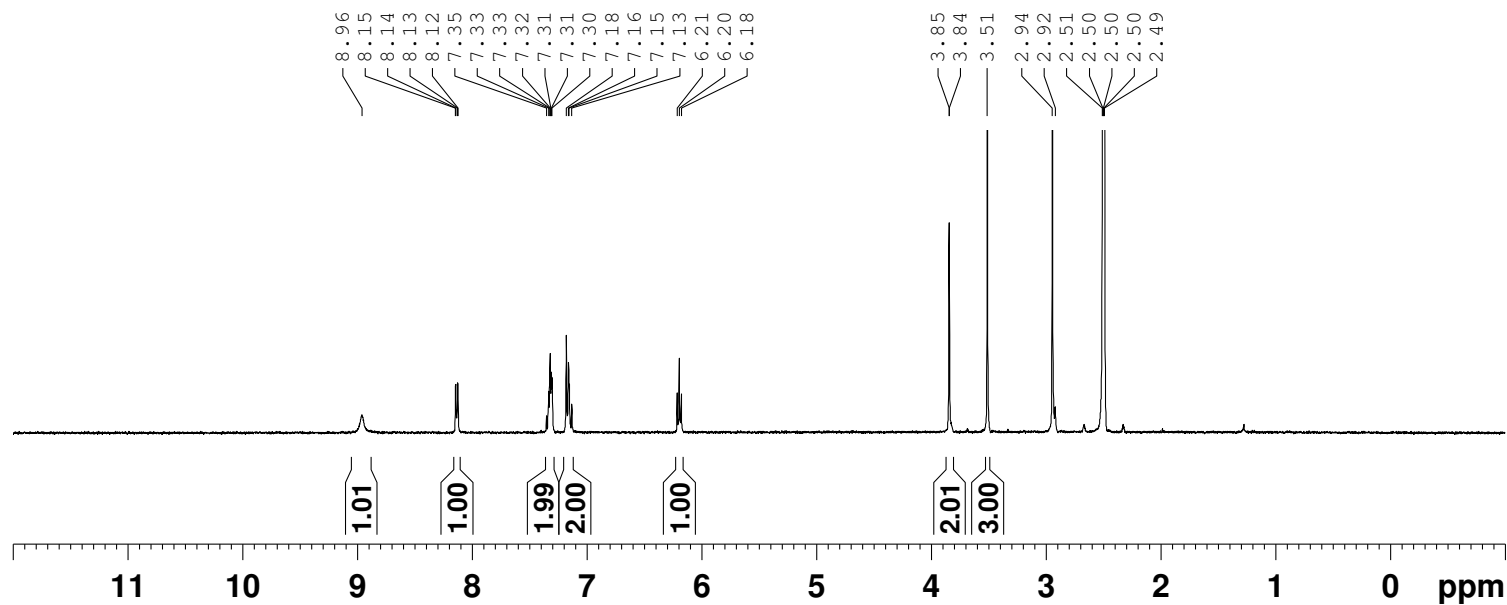

H NMR of 2a IN DMSO AT 100°C

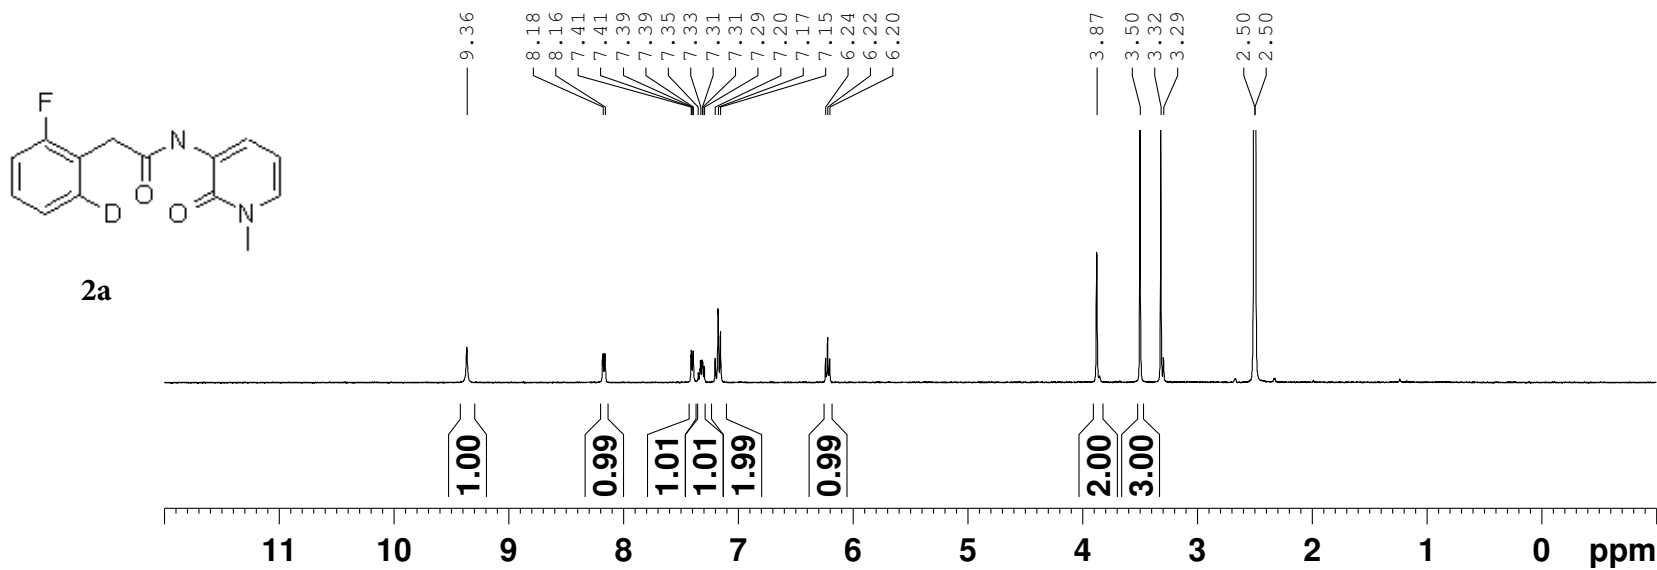

H NMR of 2a IN DMSO AT 20°C

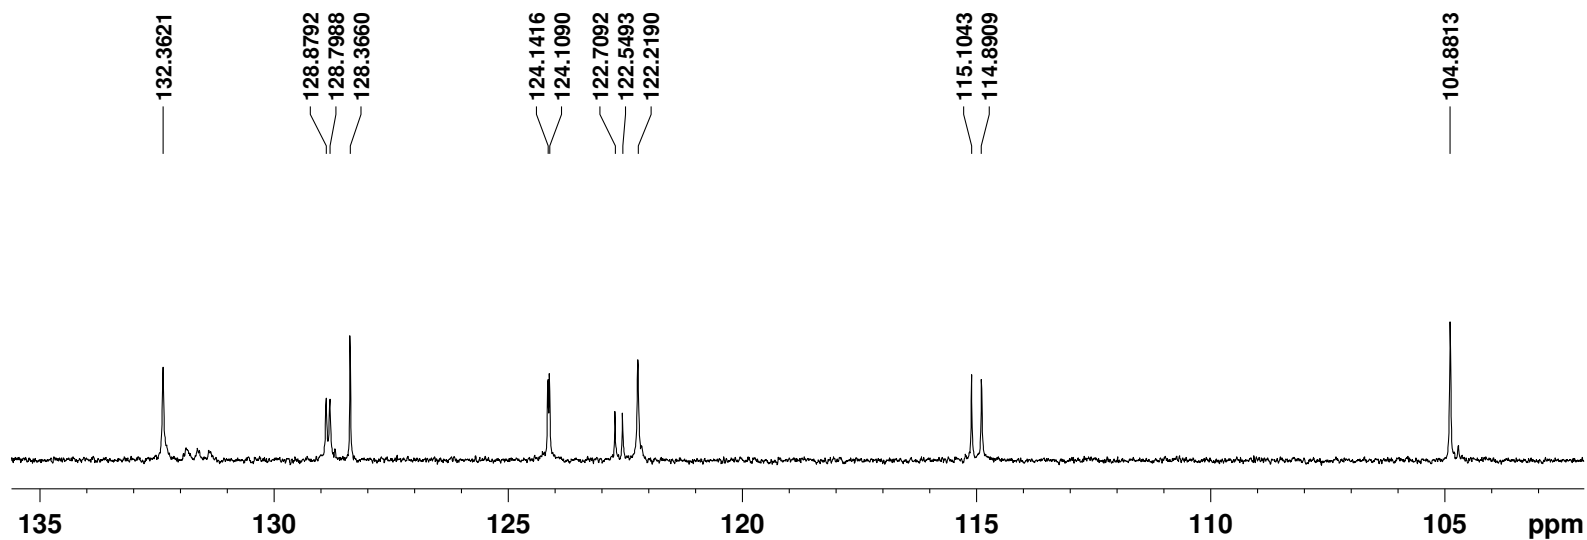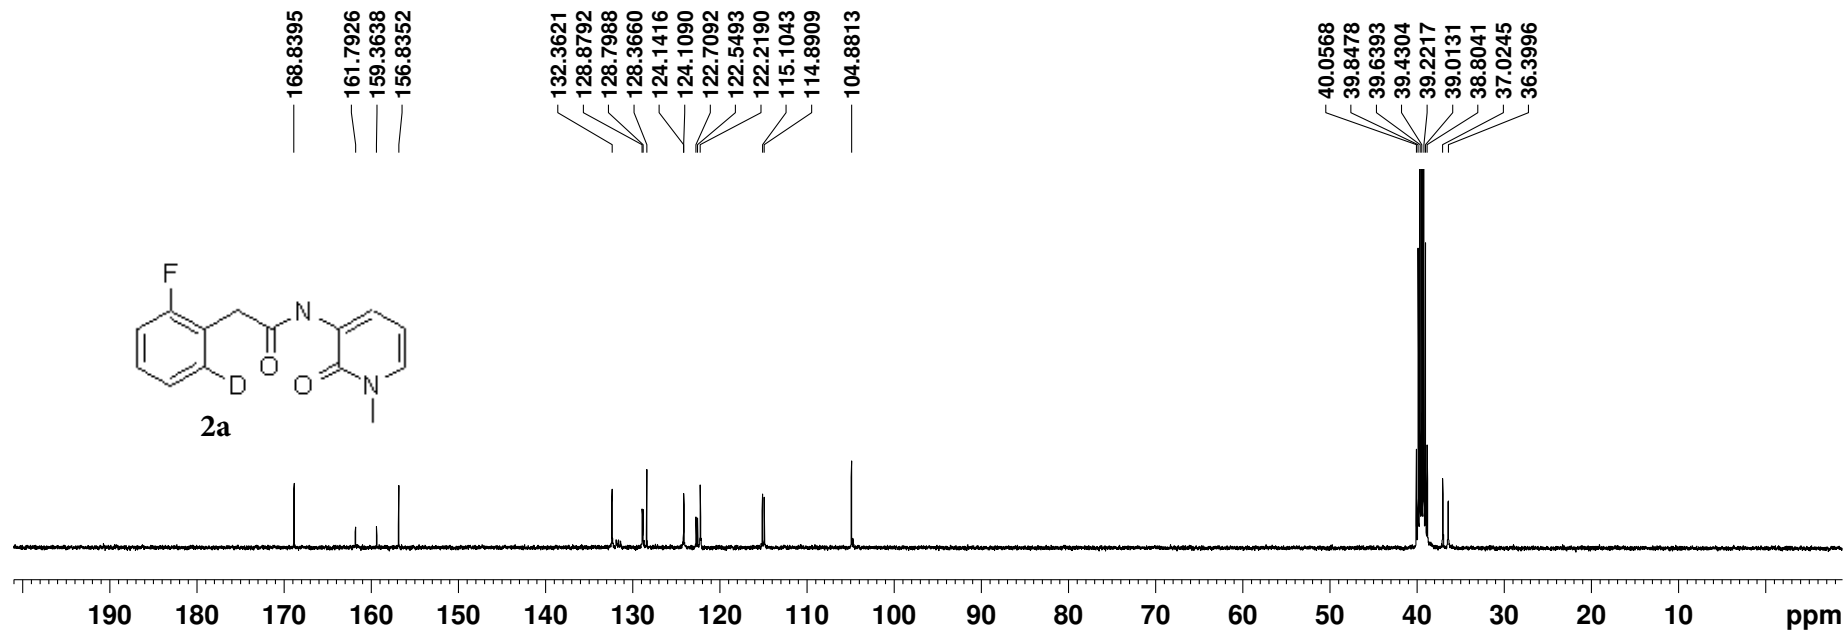

$^{13}\text{C}$  NMR of 2a IN DMSO

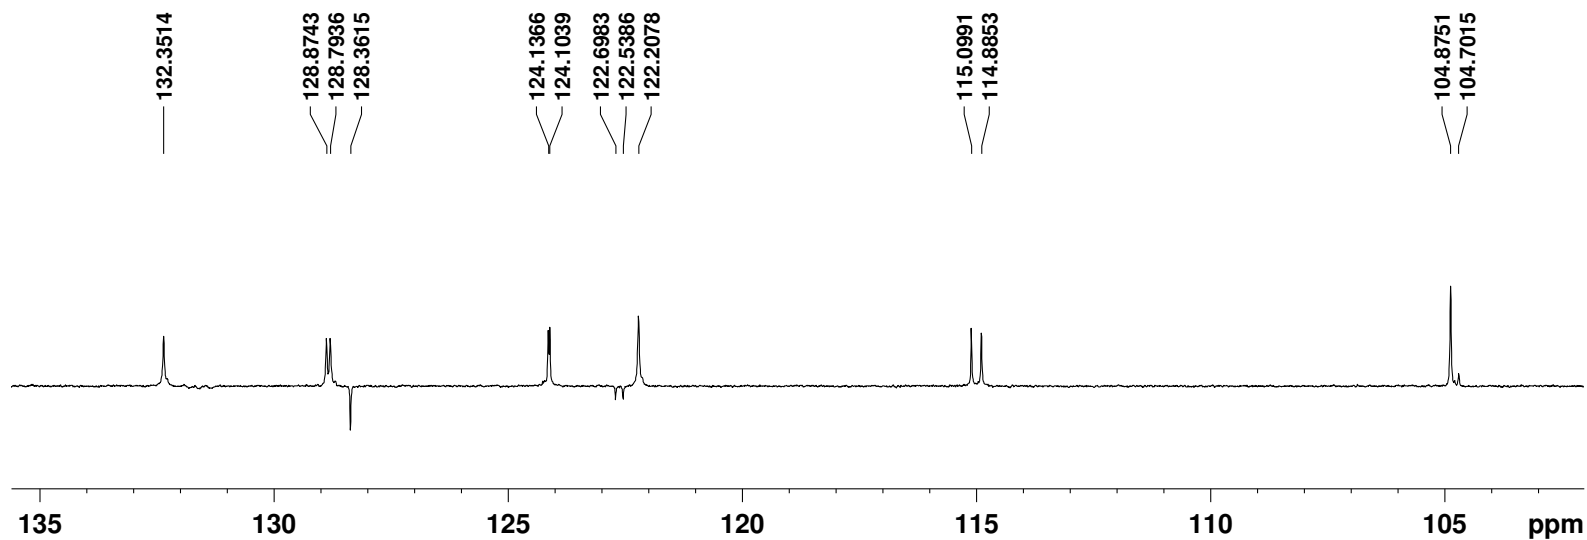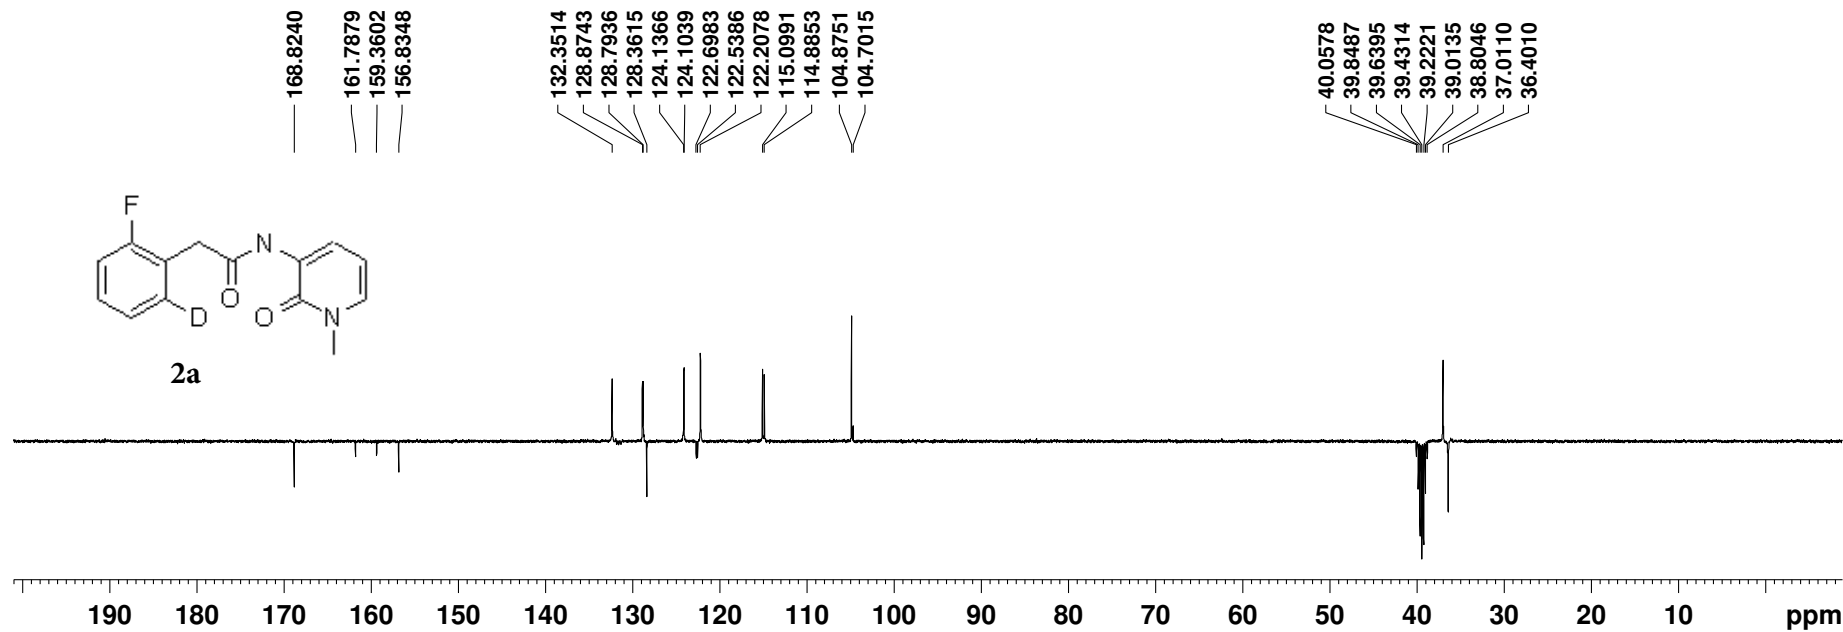

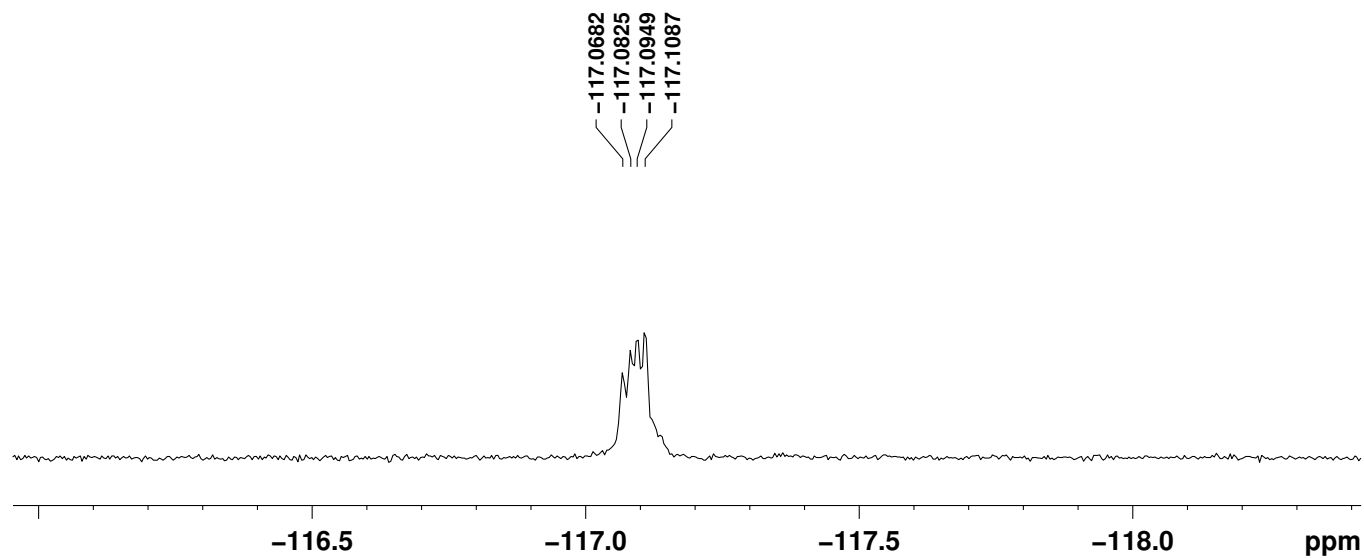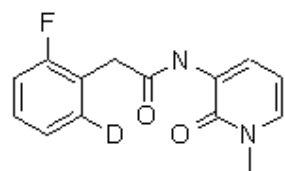

2a

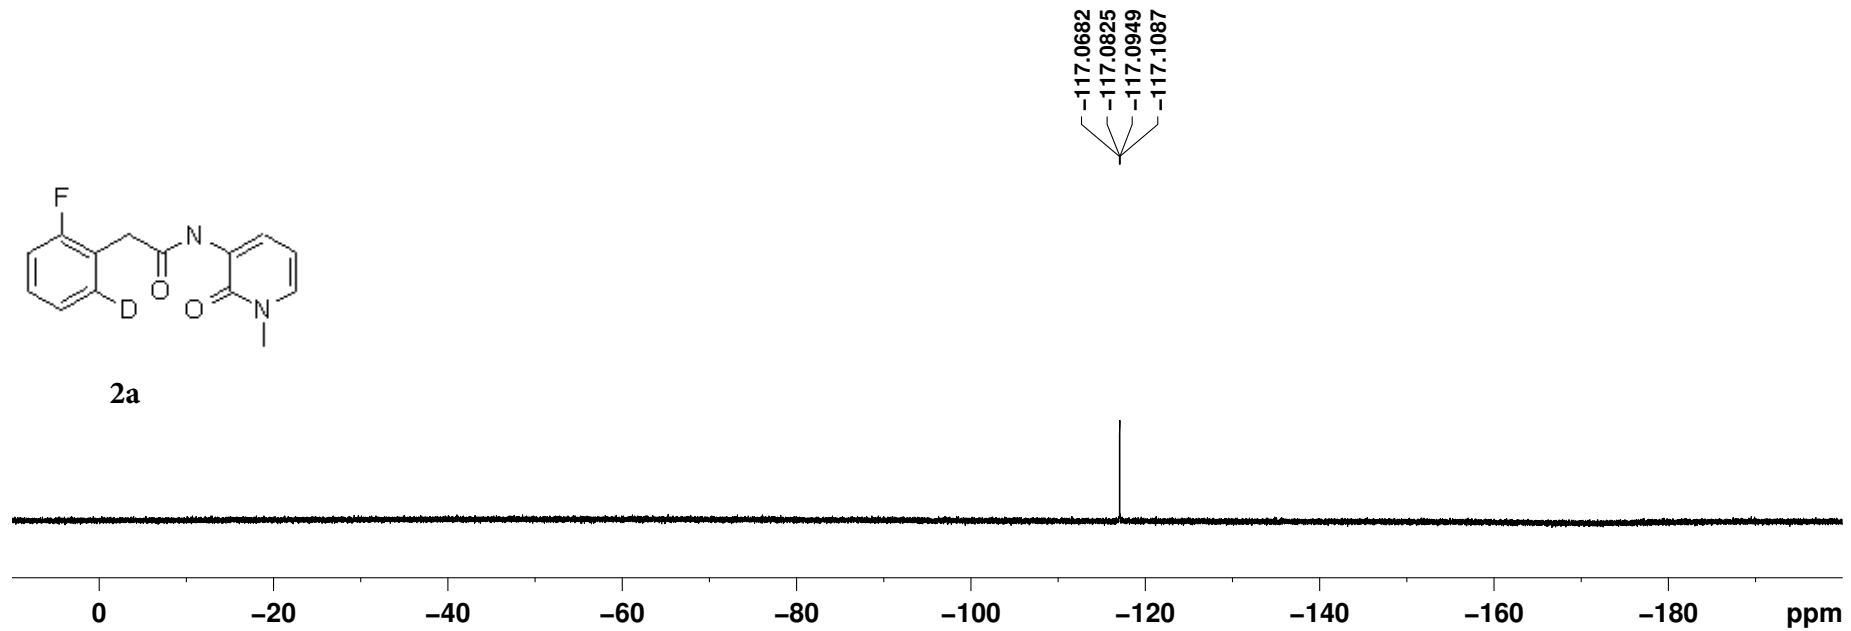

$^{19}\text{F}$  NMR of 2a IN DMSO (PC)

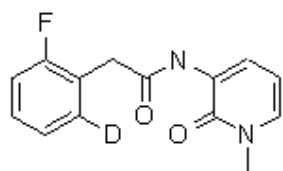

**2a**

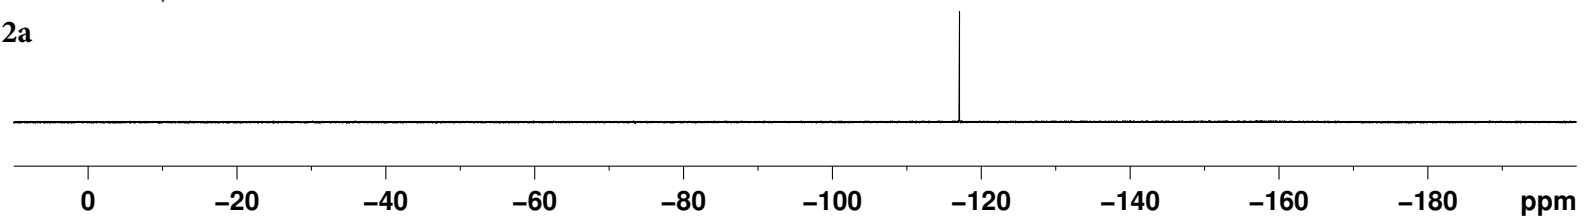

**<sup>19</sup>F NMR of 2a IN DMSO (PDC)**

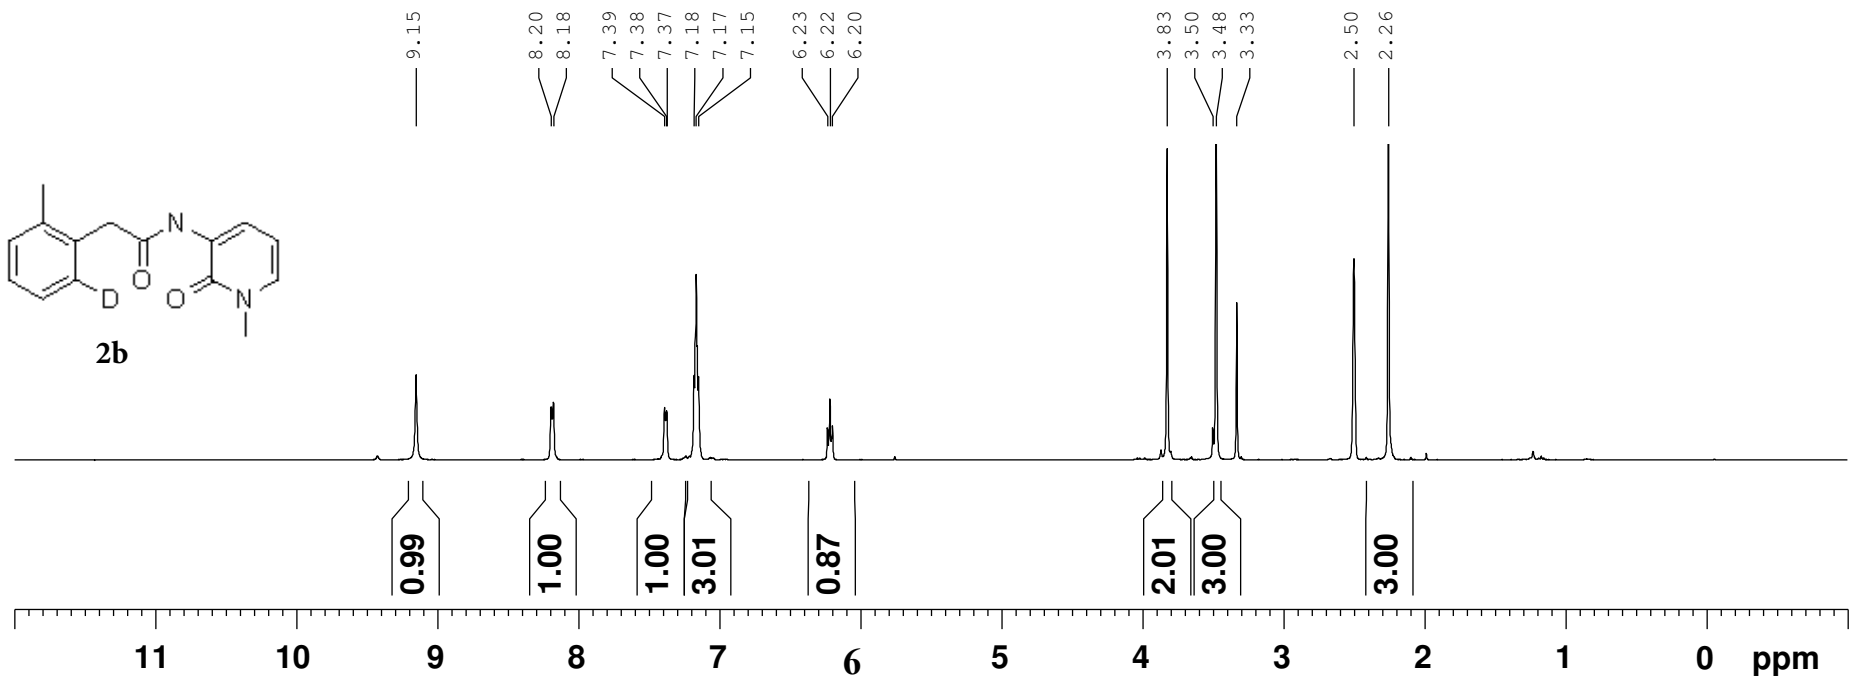

<sup>1</sup>H NMR of 2b IN DMSO

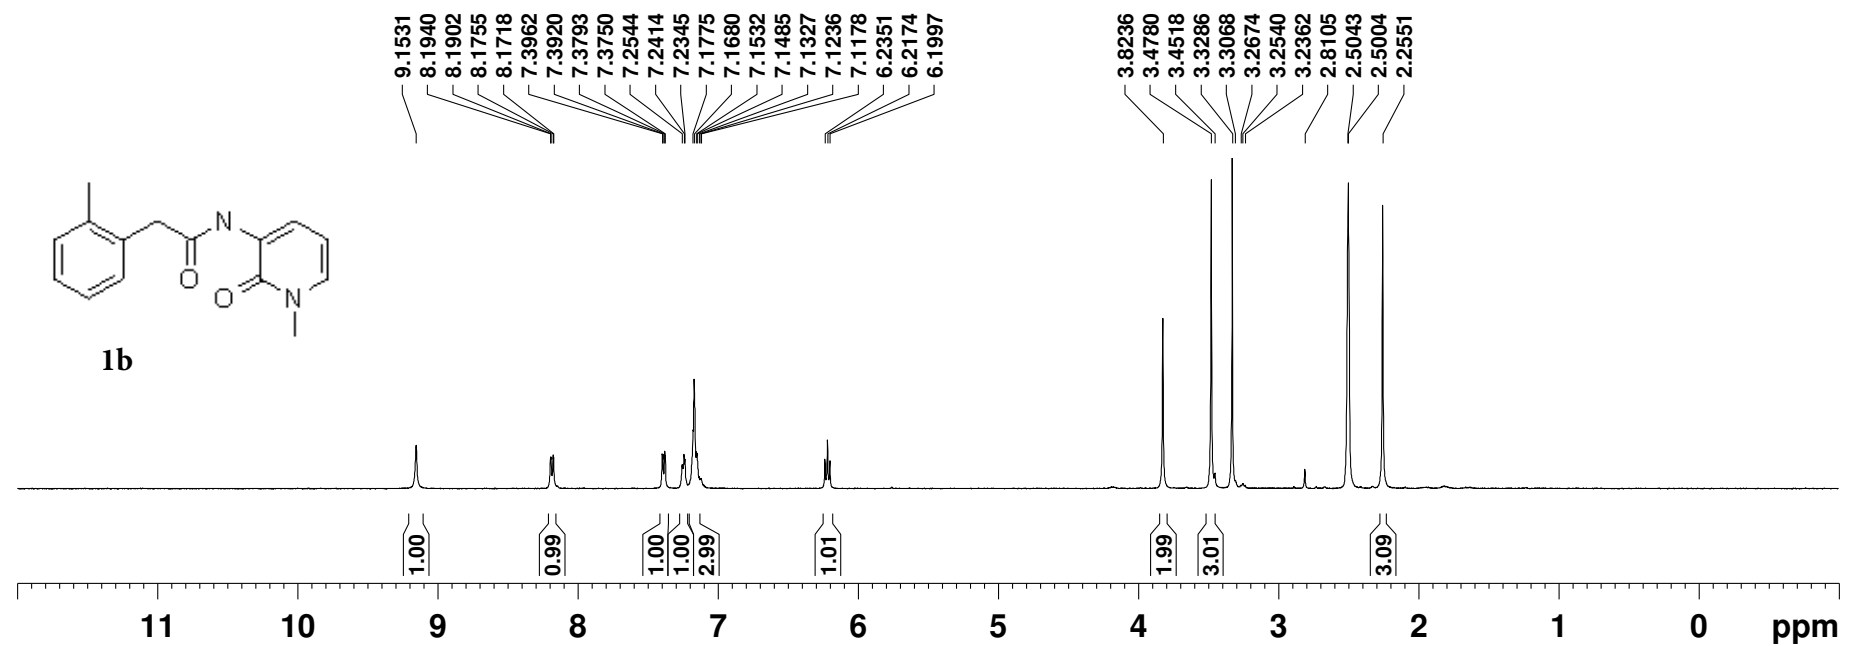

<sup>1</sup>H NMR of 1b IN DMSO

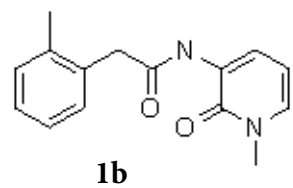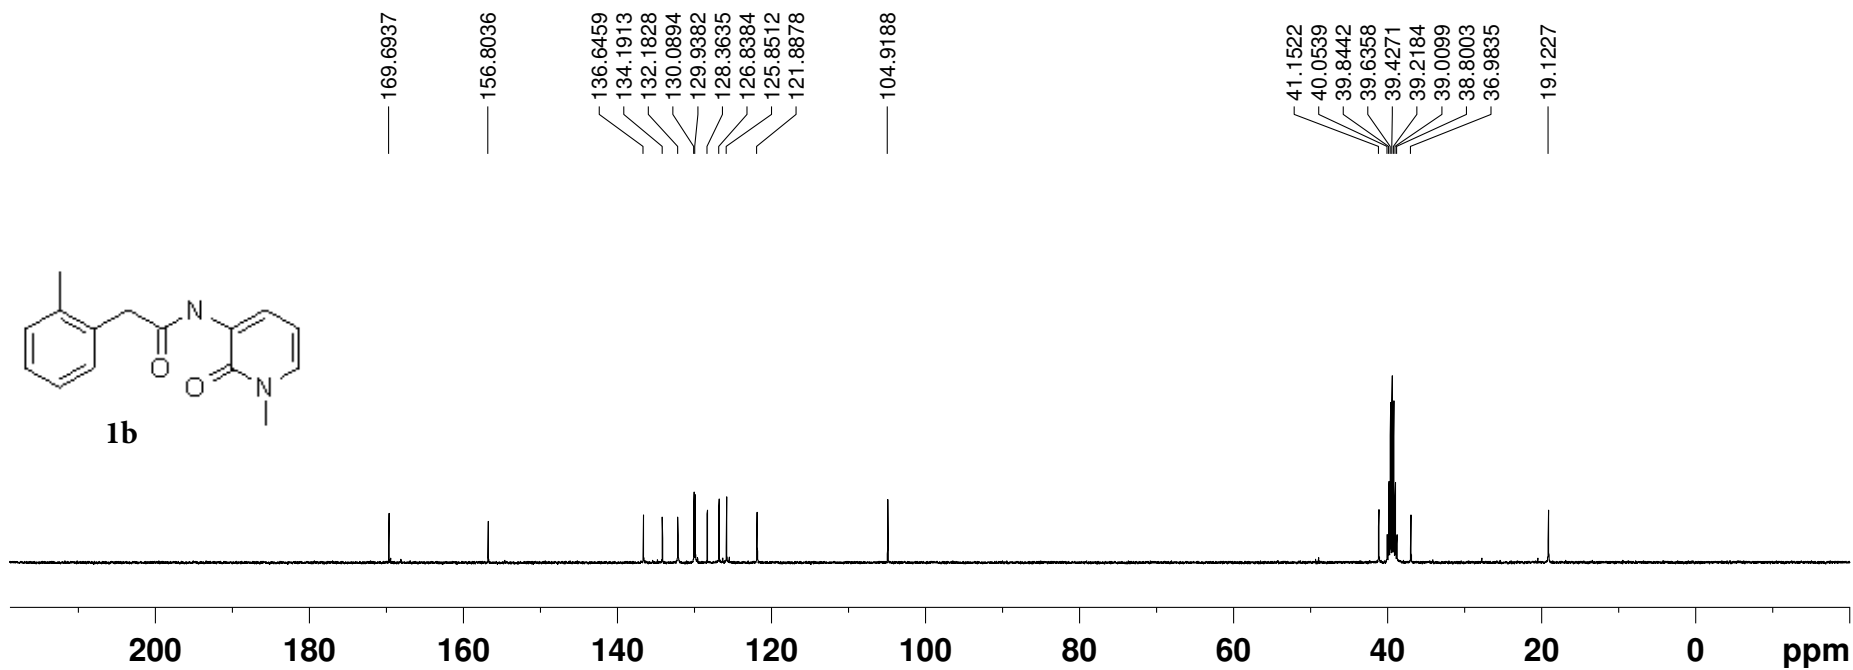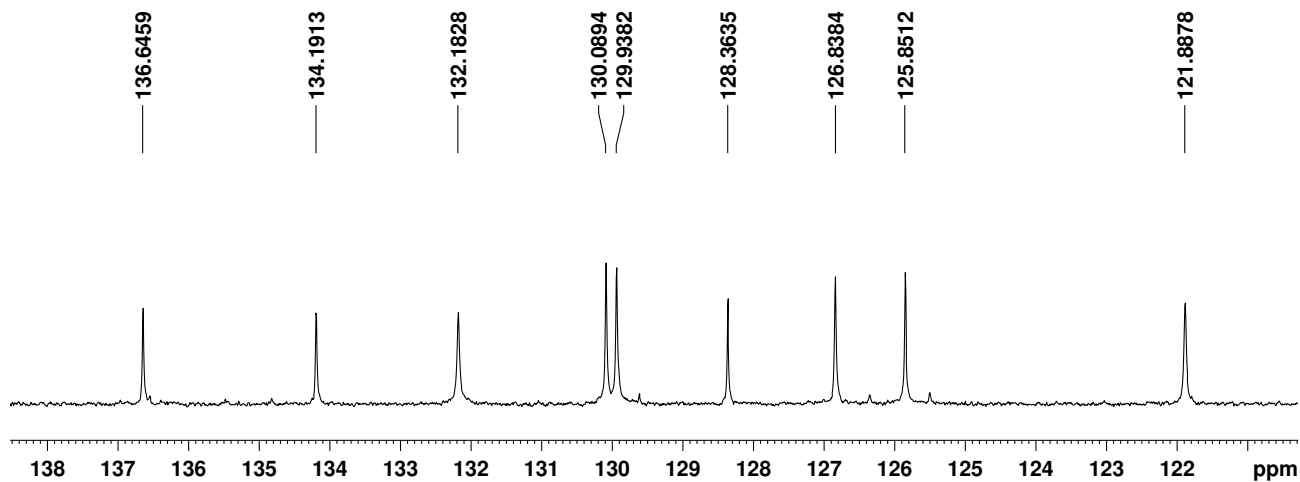

13C NMR of 1b IN DMSO

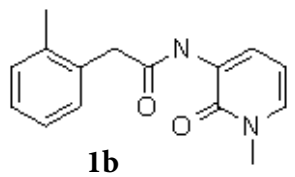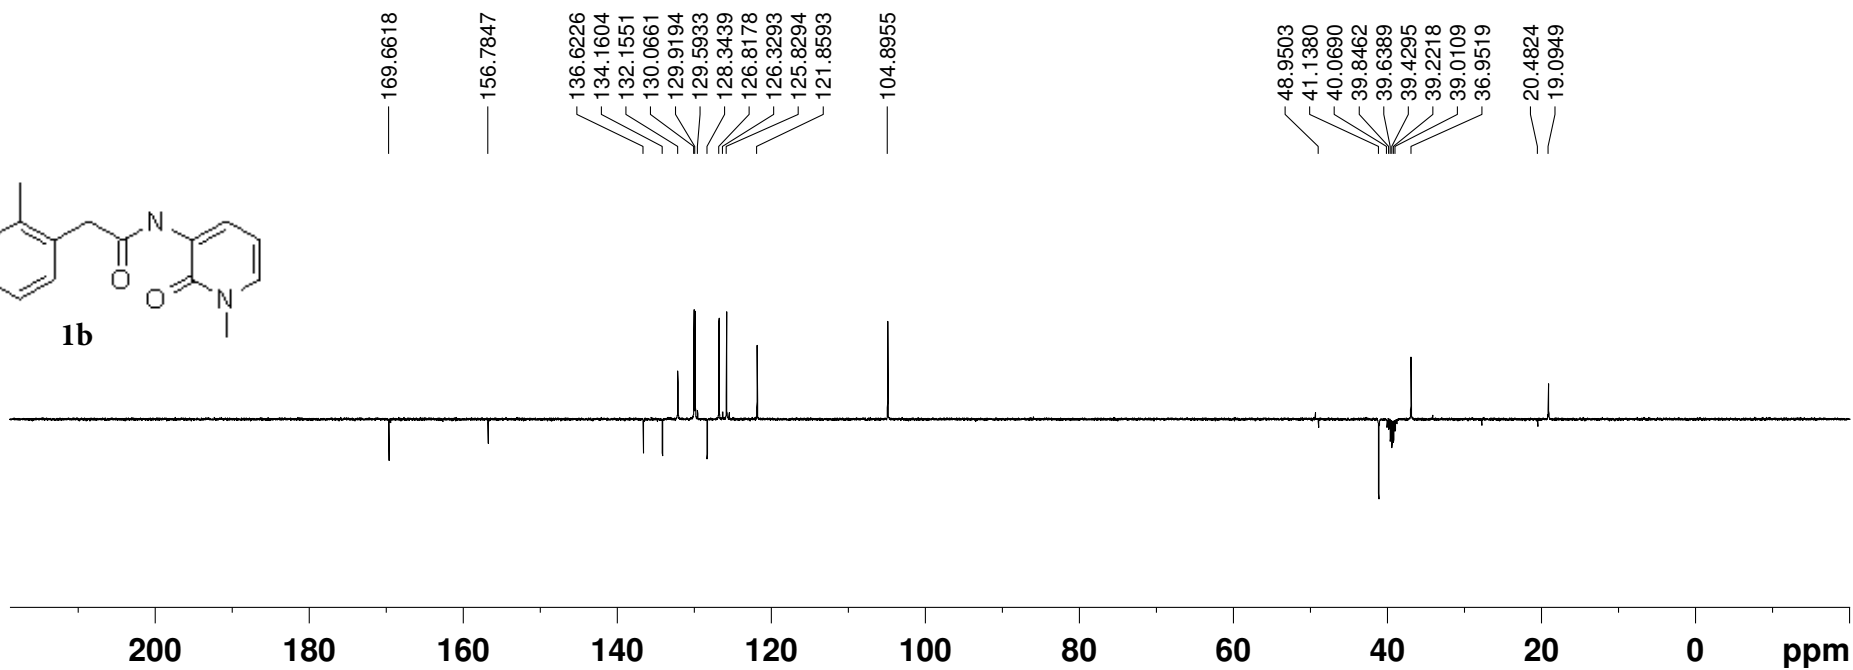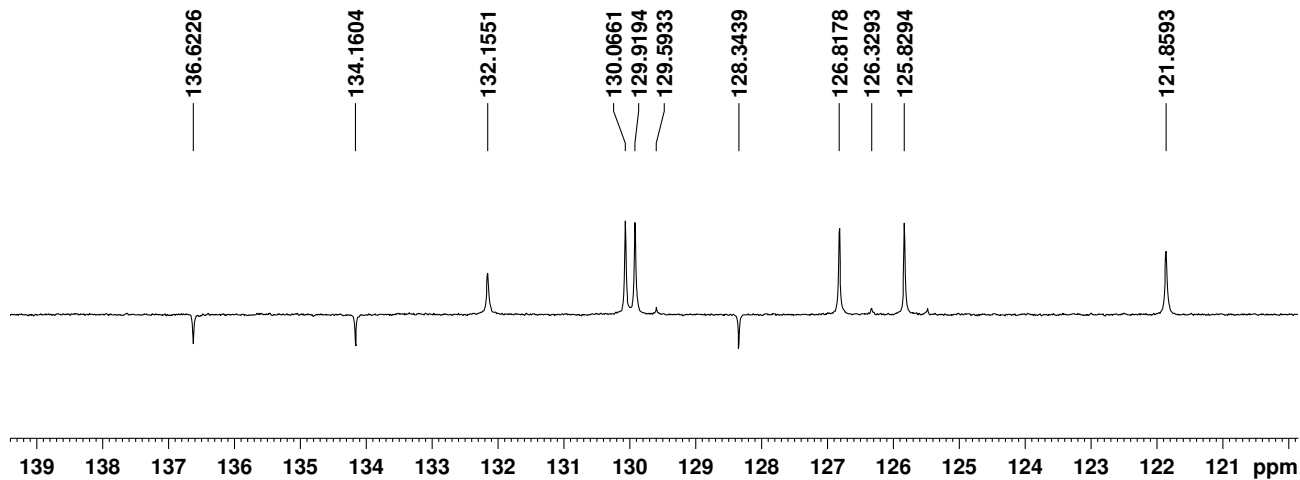



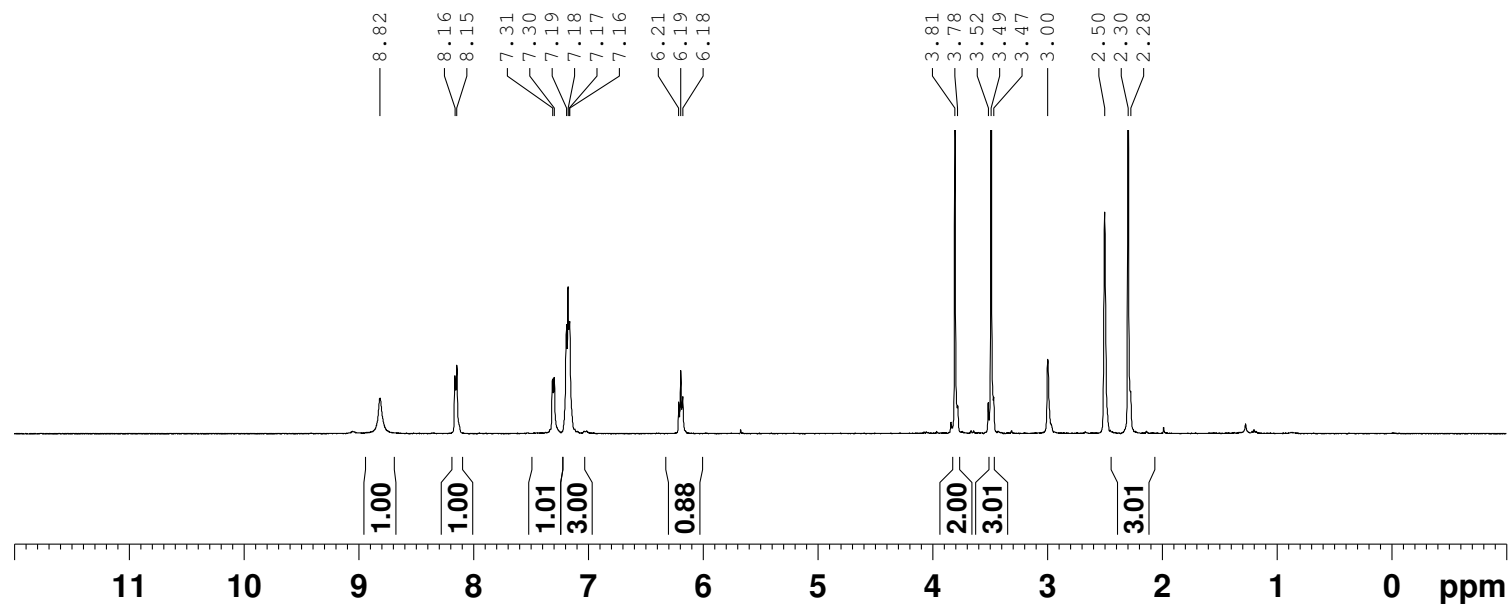

<sup>1</sup>H NMR of 2b IN DMSO AT 100°C

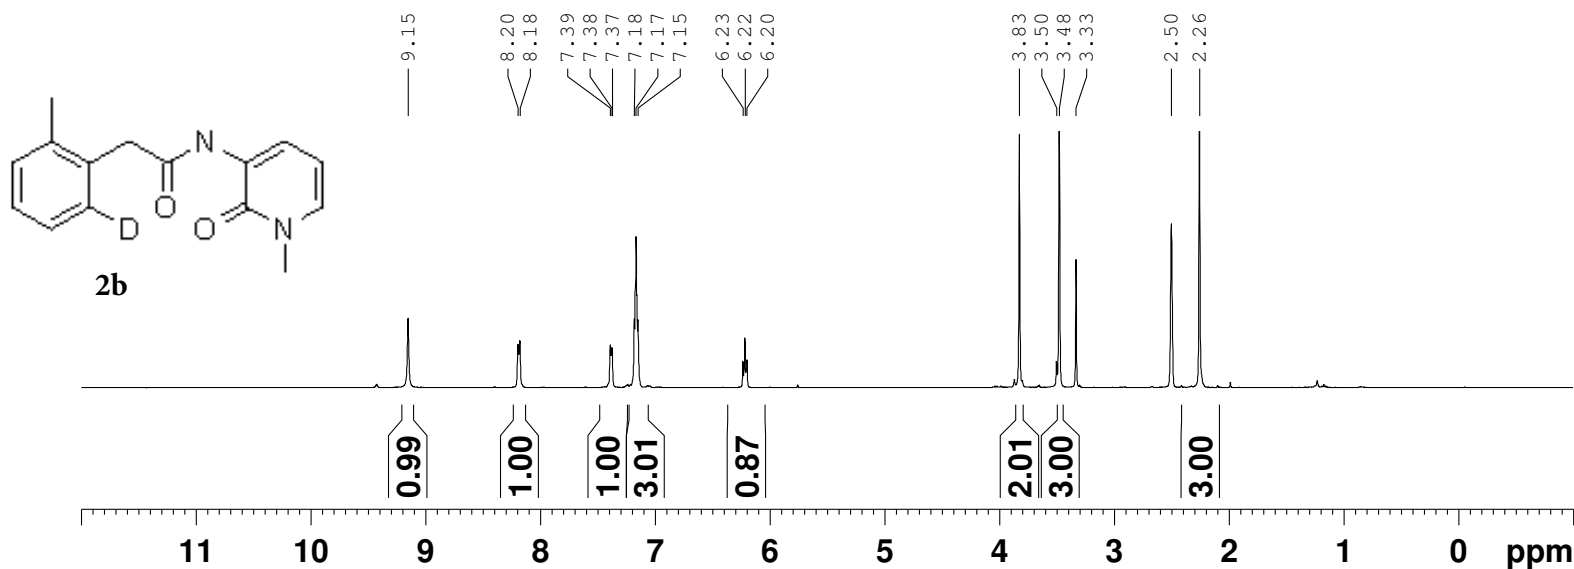

<sup>1</sup>H NMR of 2b IN DMSO AT 20°C

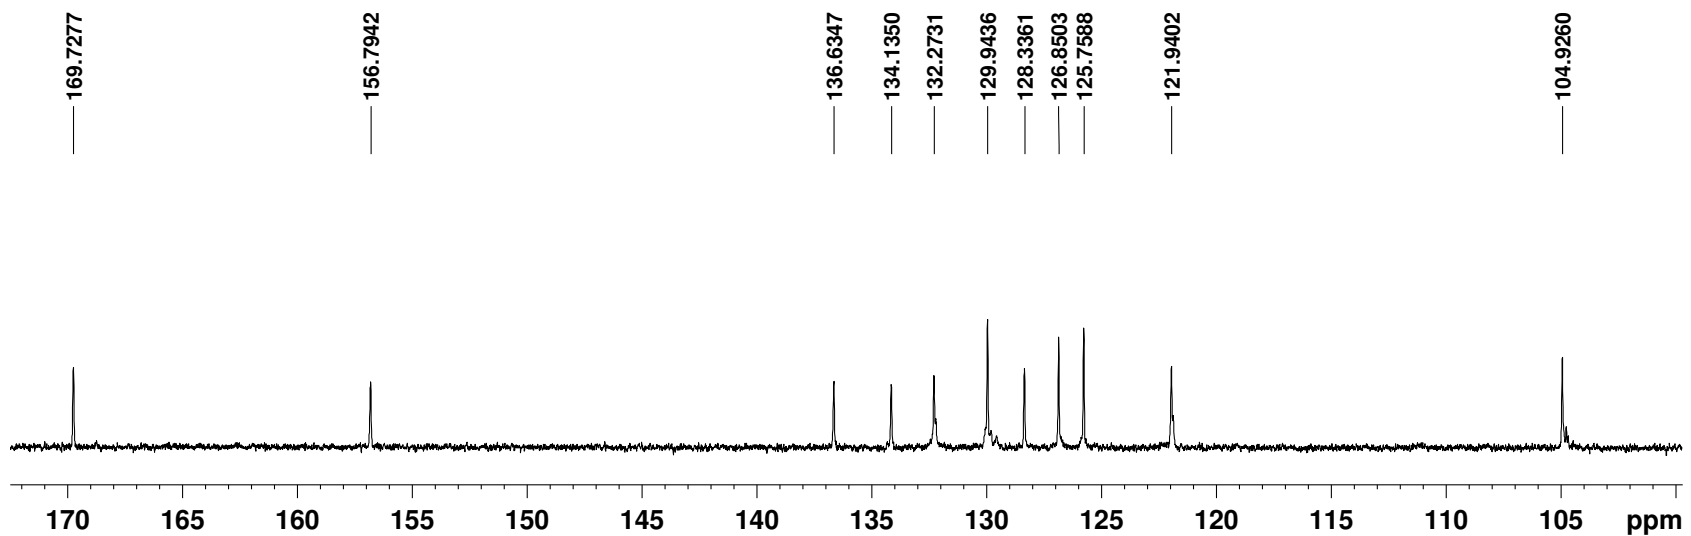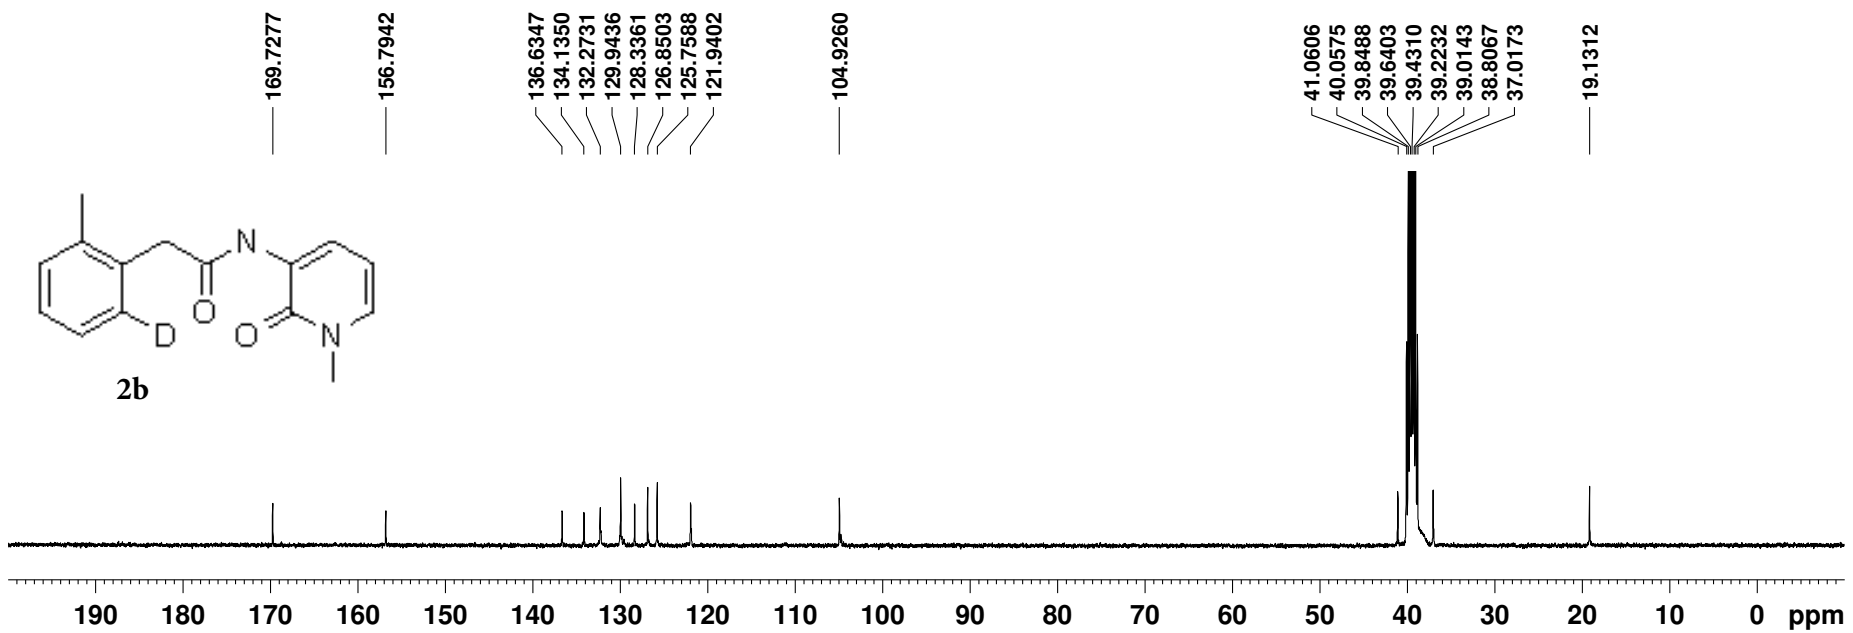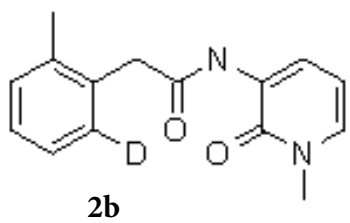

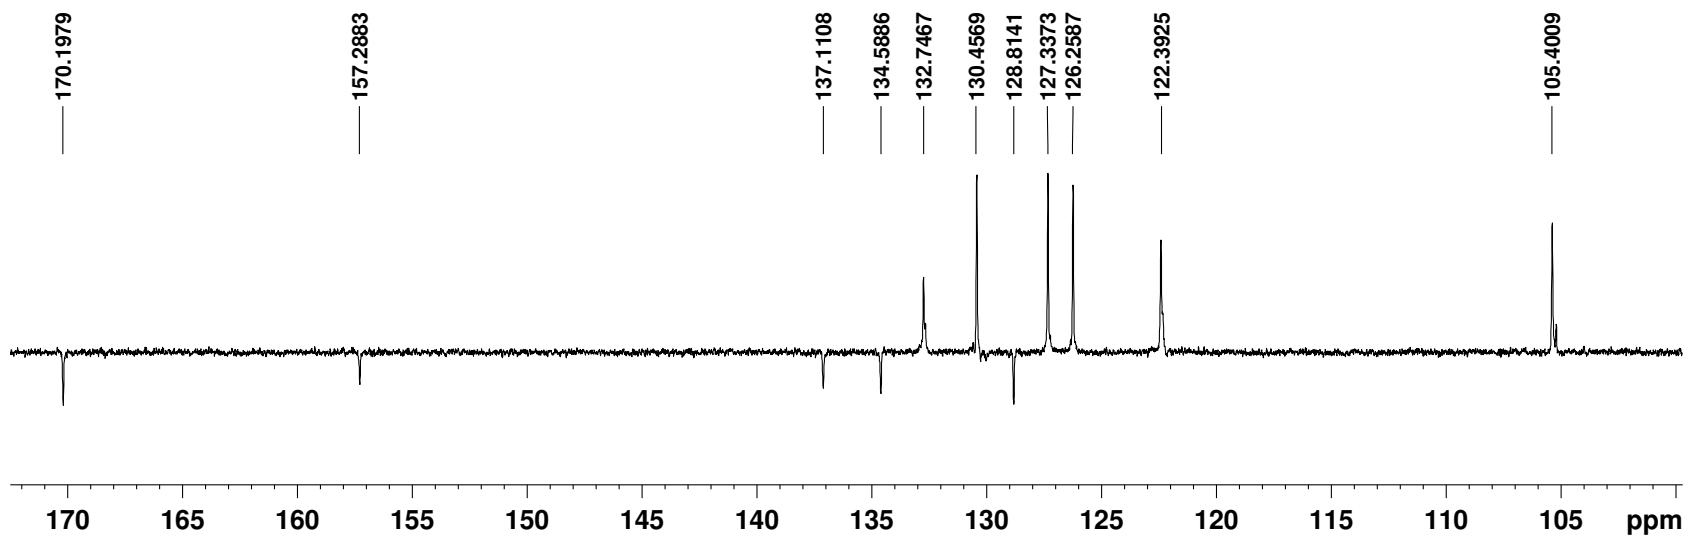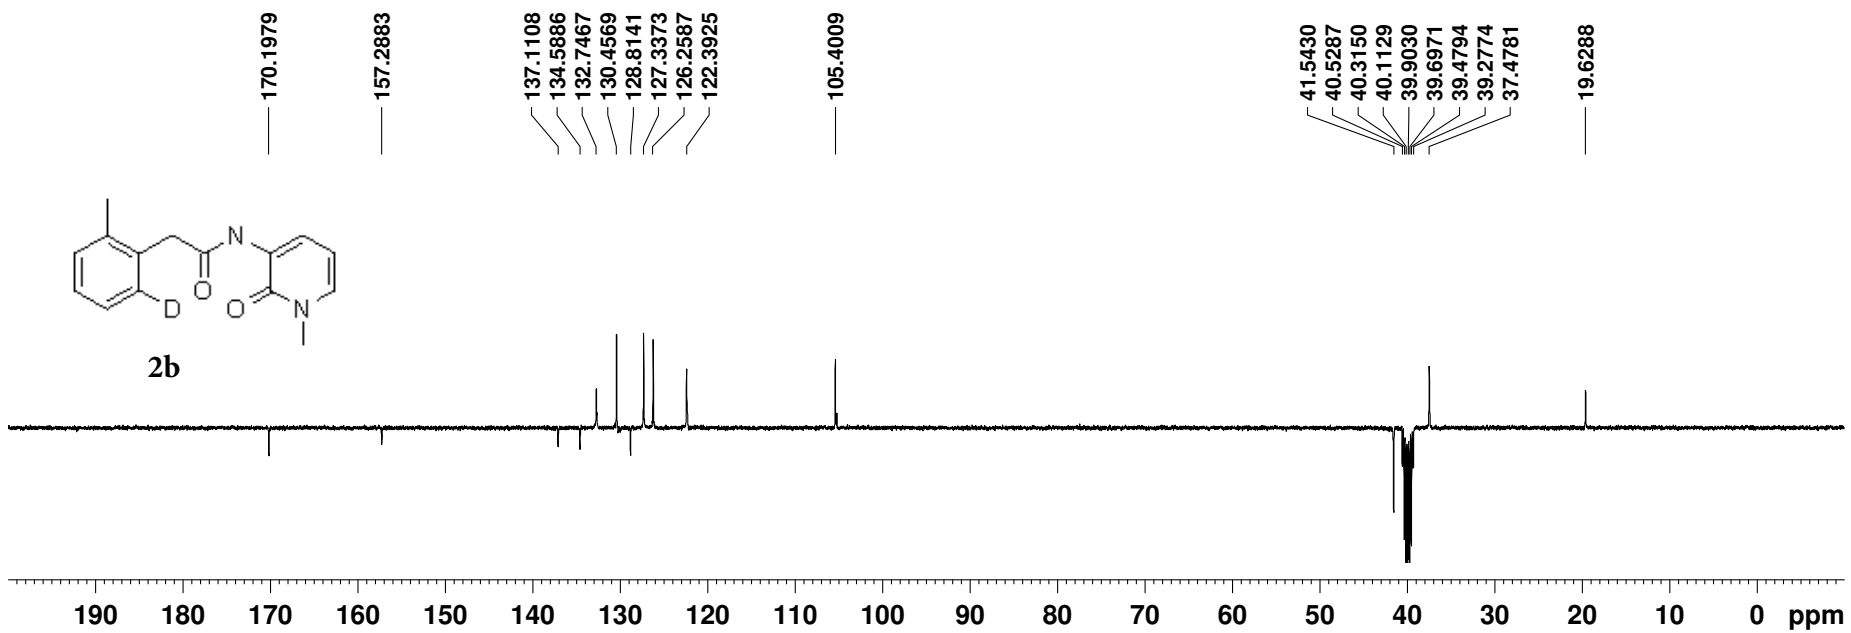

APT of 2b IN DMSO

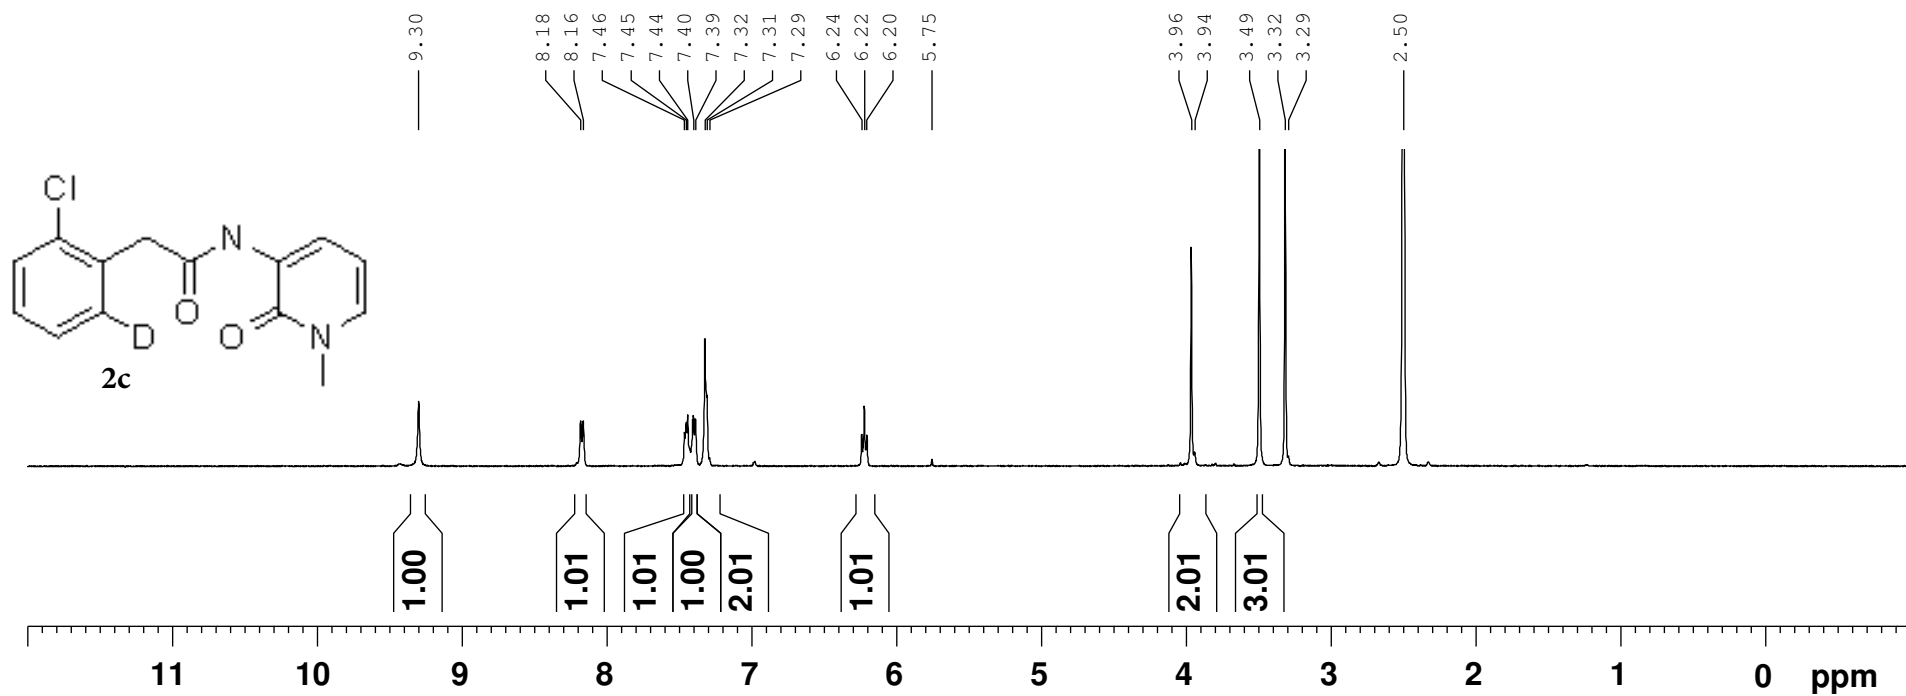

<sup>1</sup>H NMR of **2c** IN DMSO

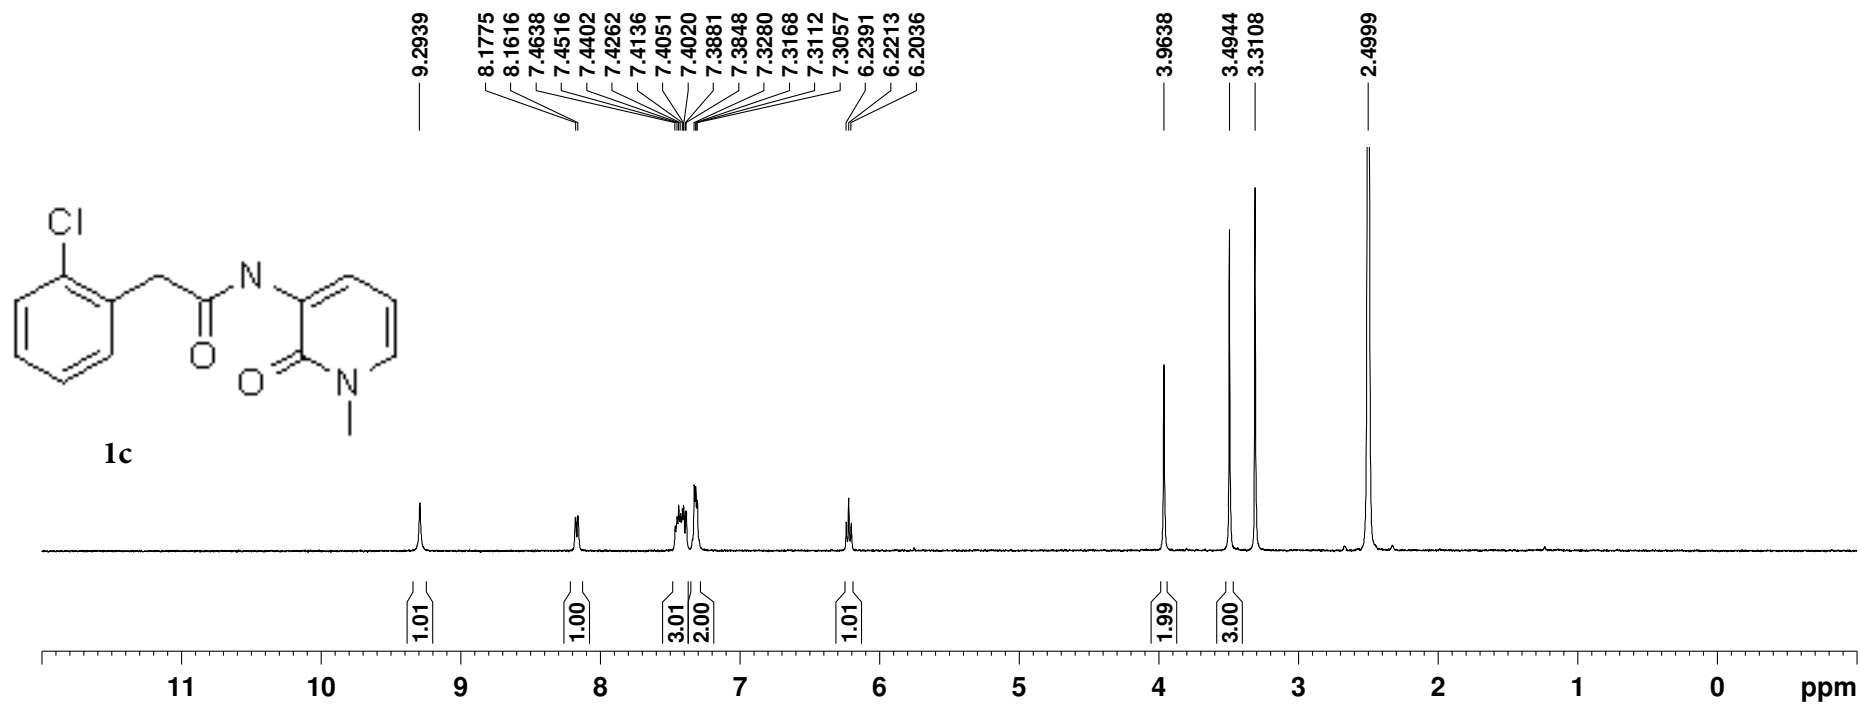

<sup>1</sup>H NMR of **1c** IN DMSO

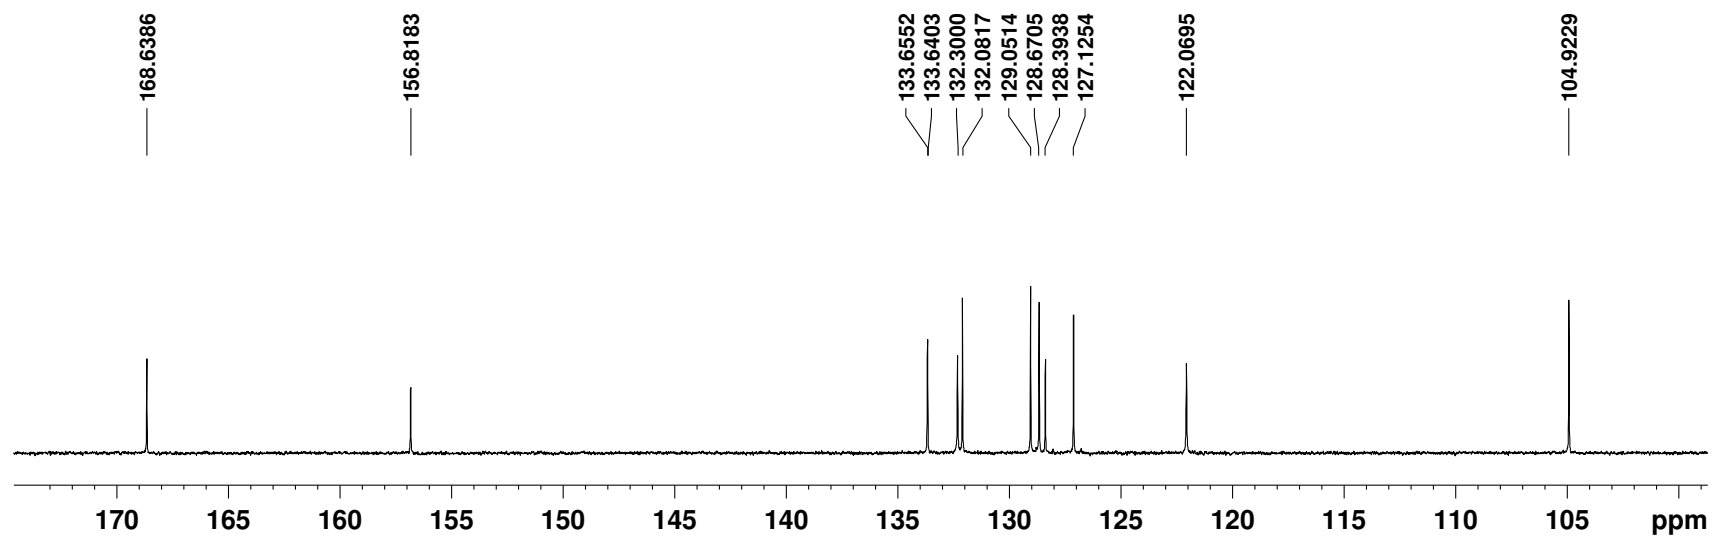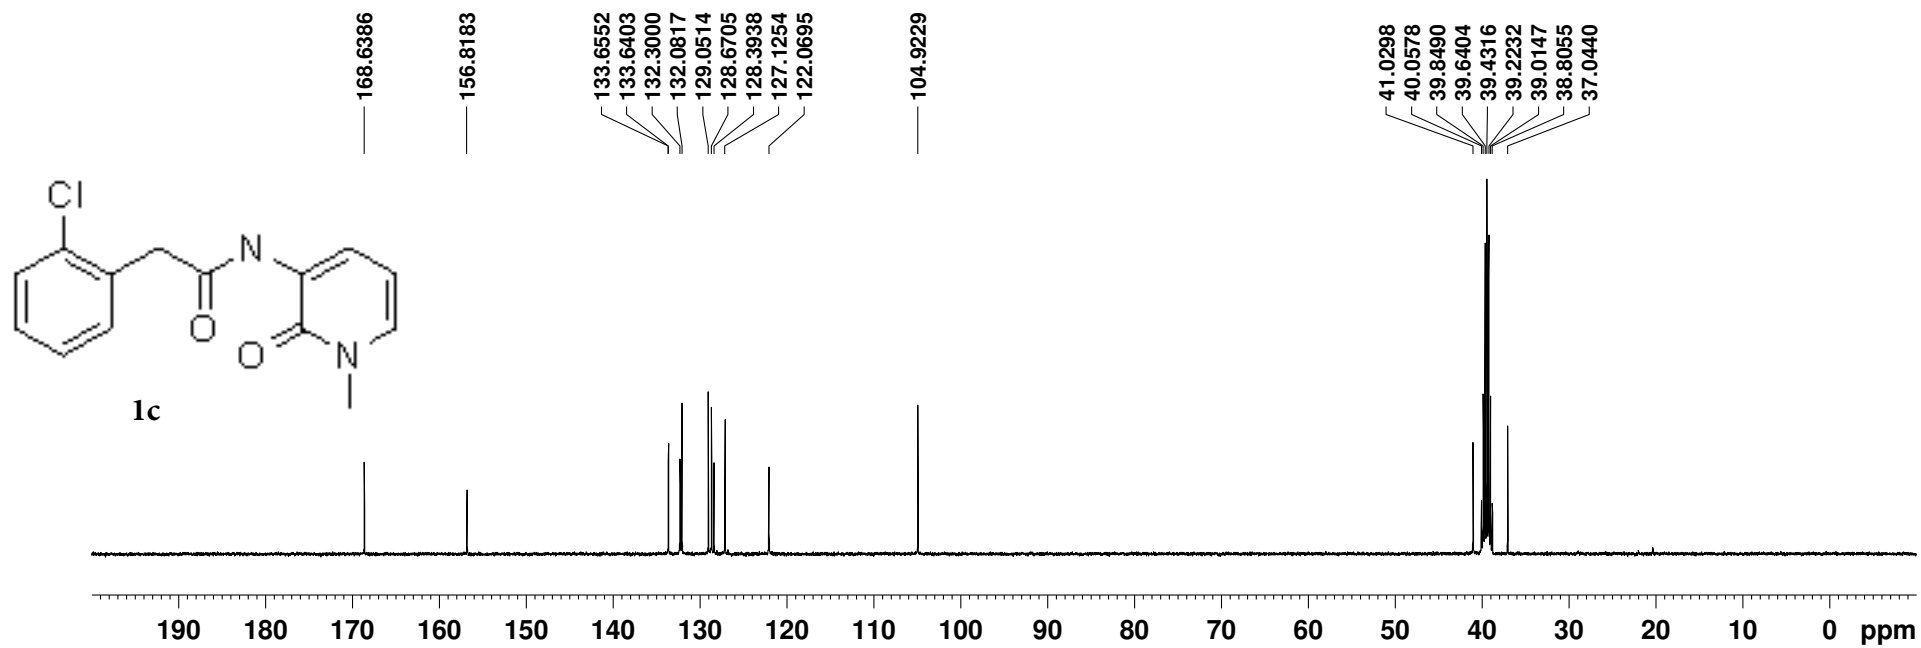

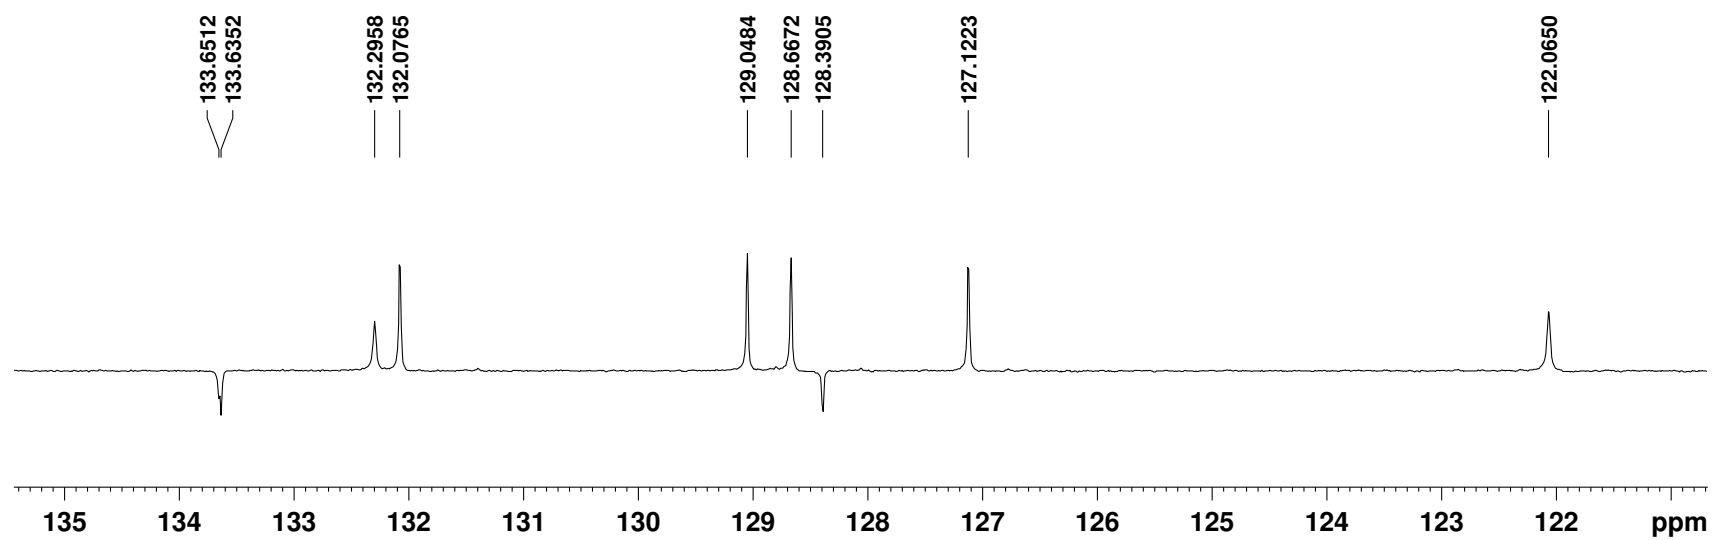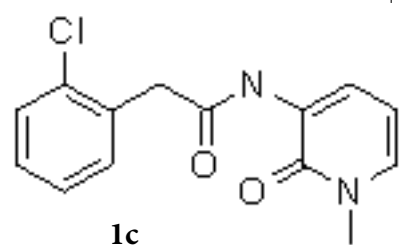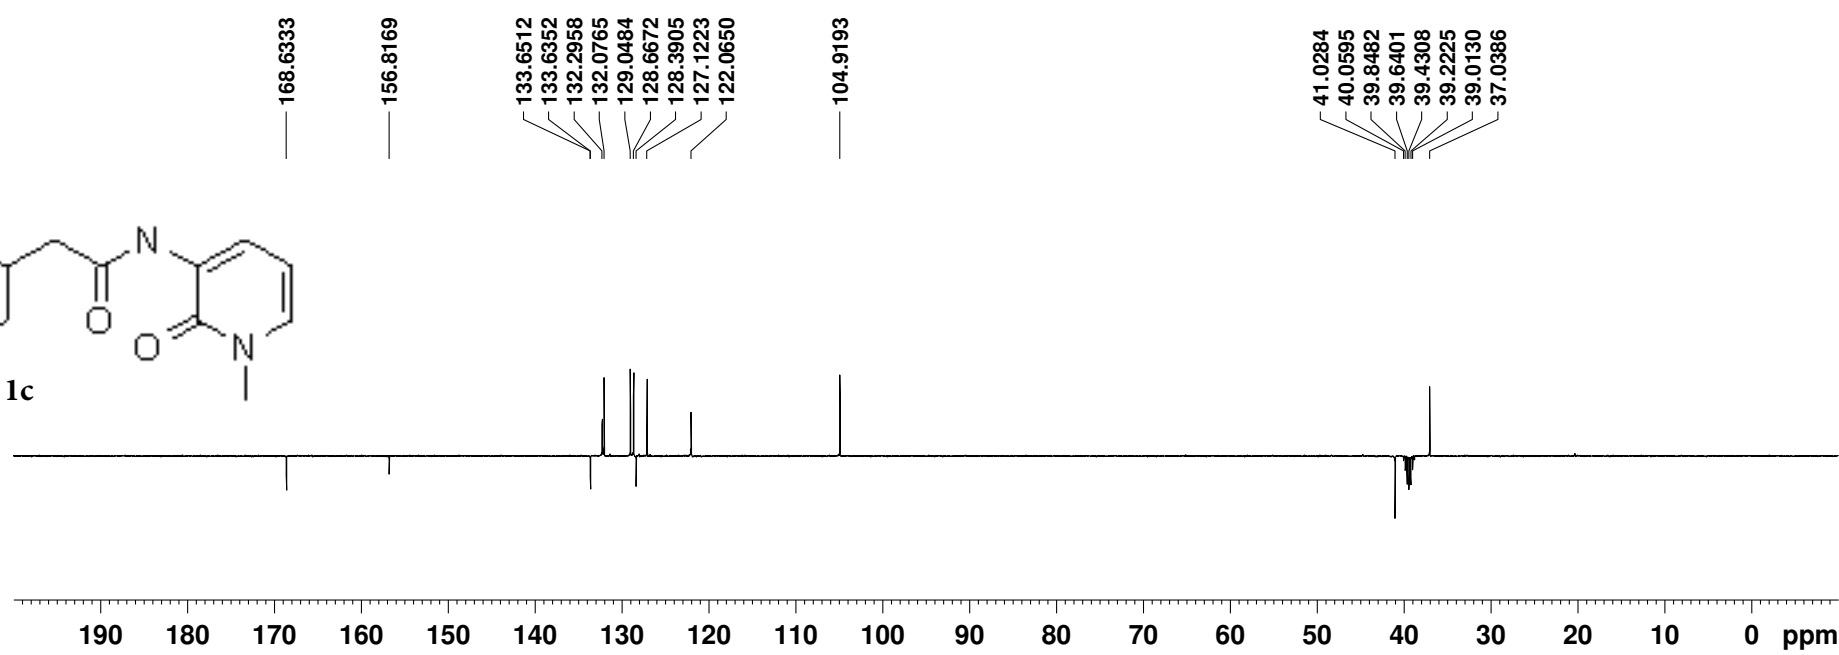

APT of 1c IN DMSO

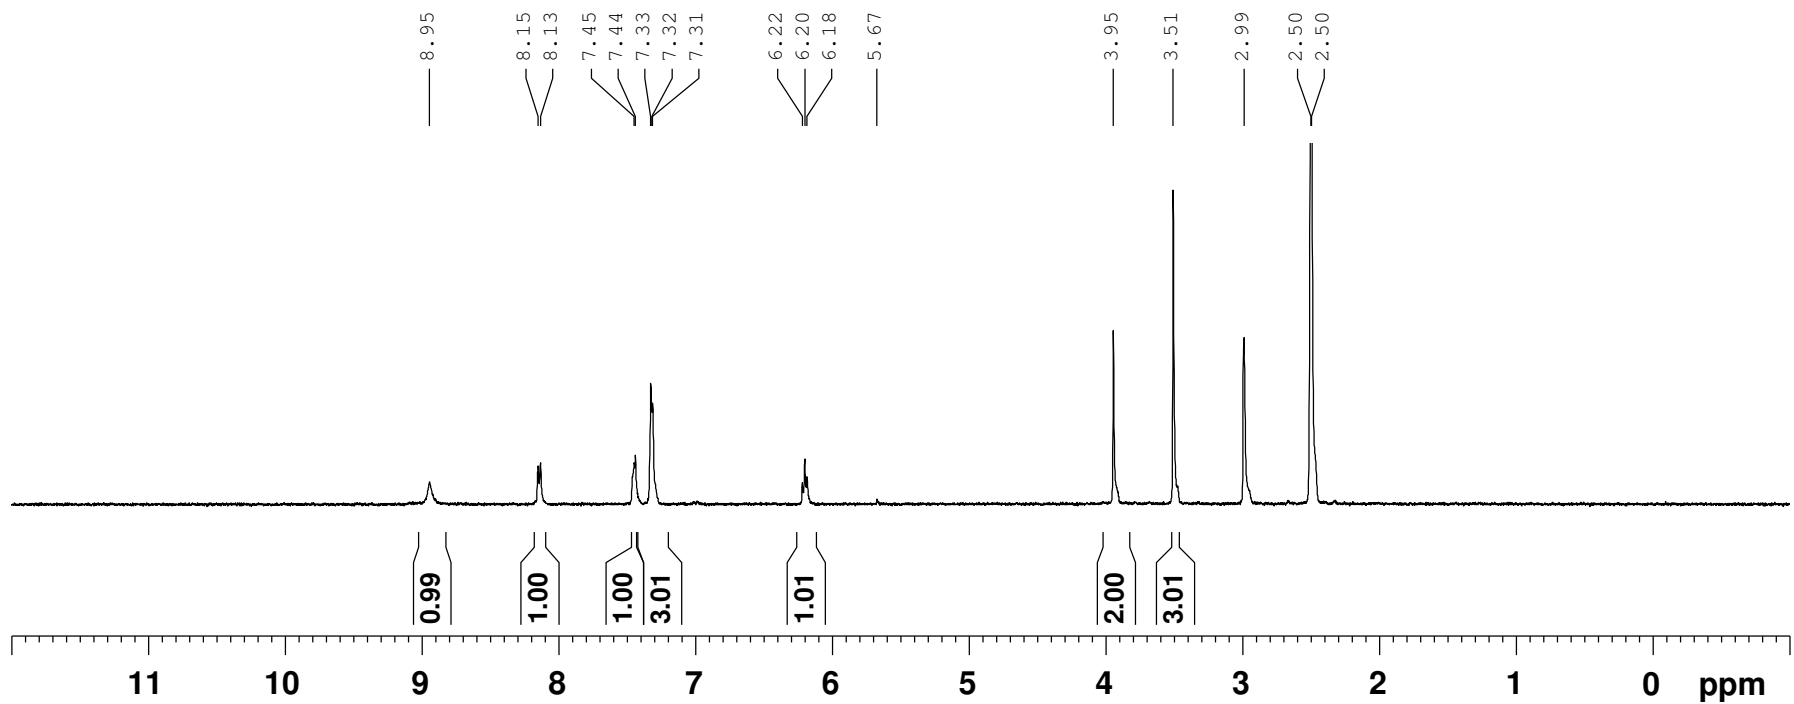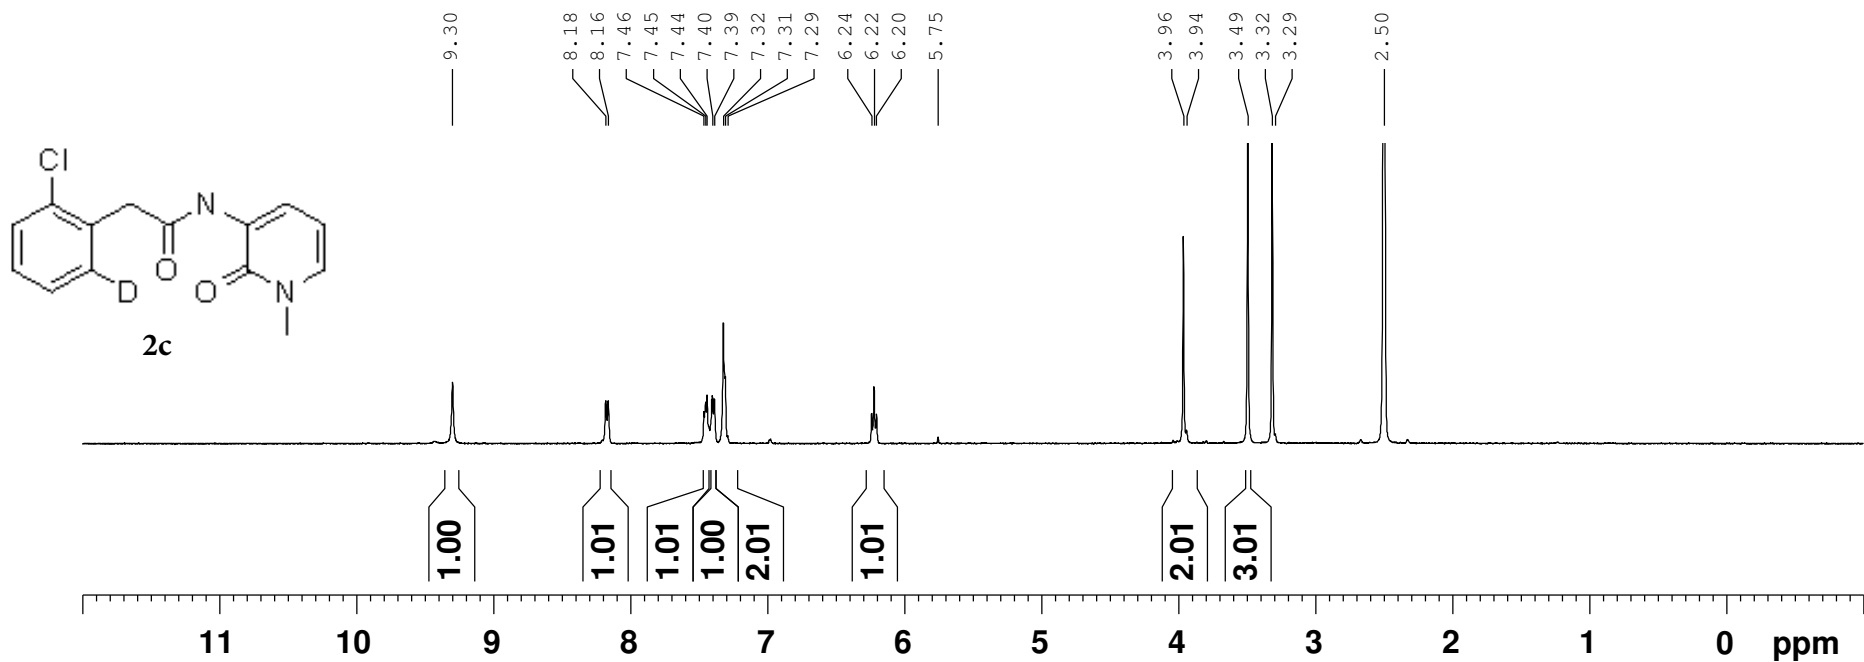

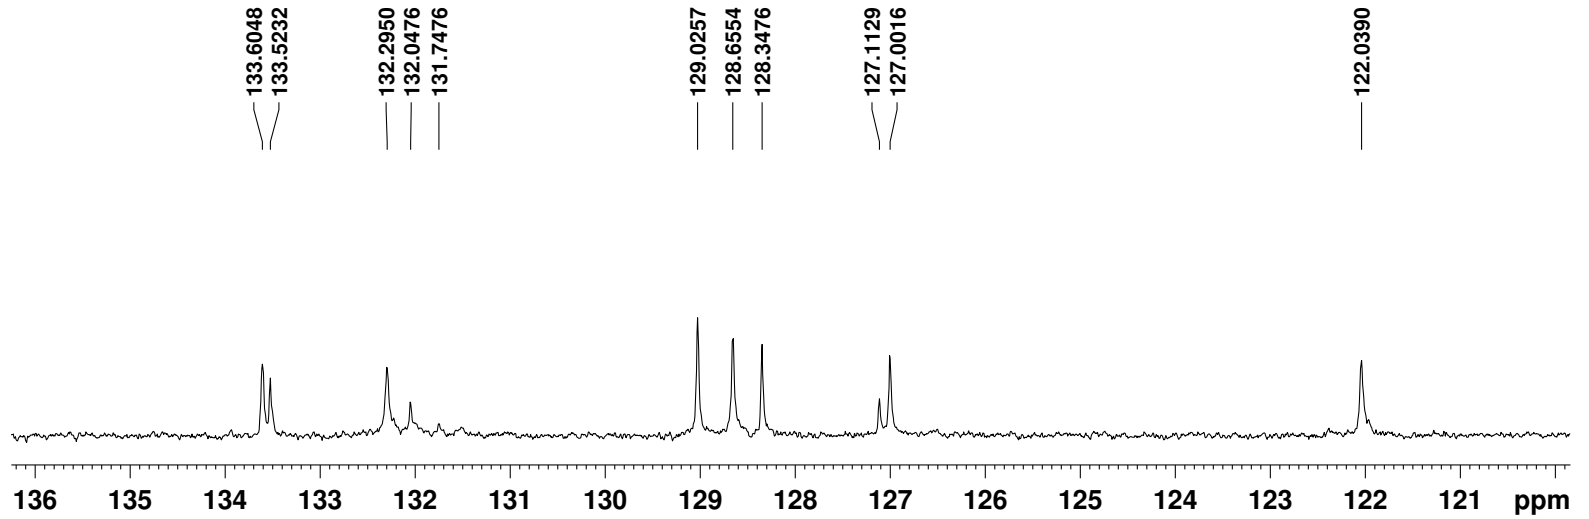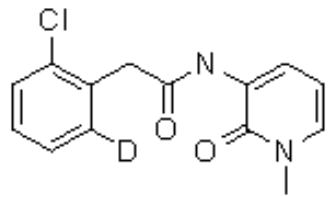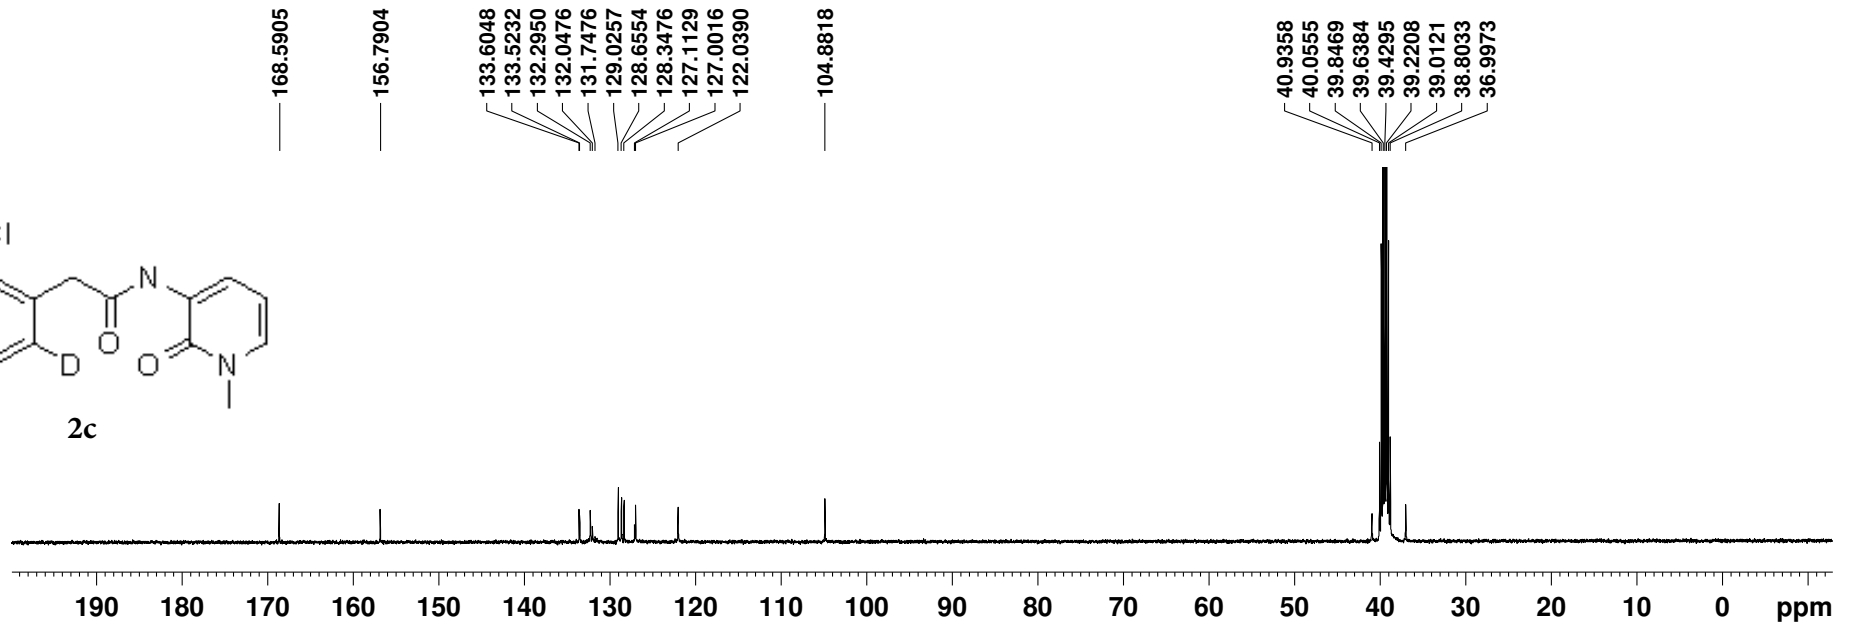



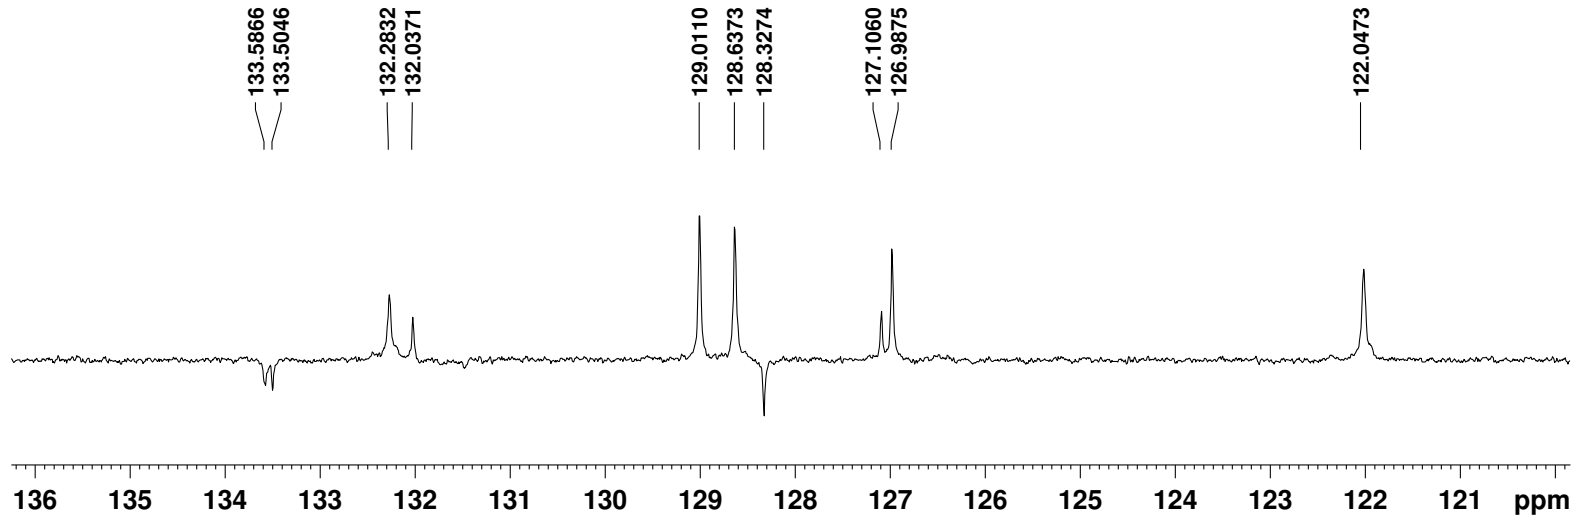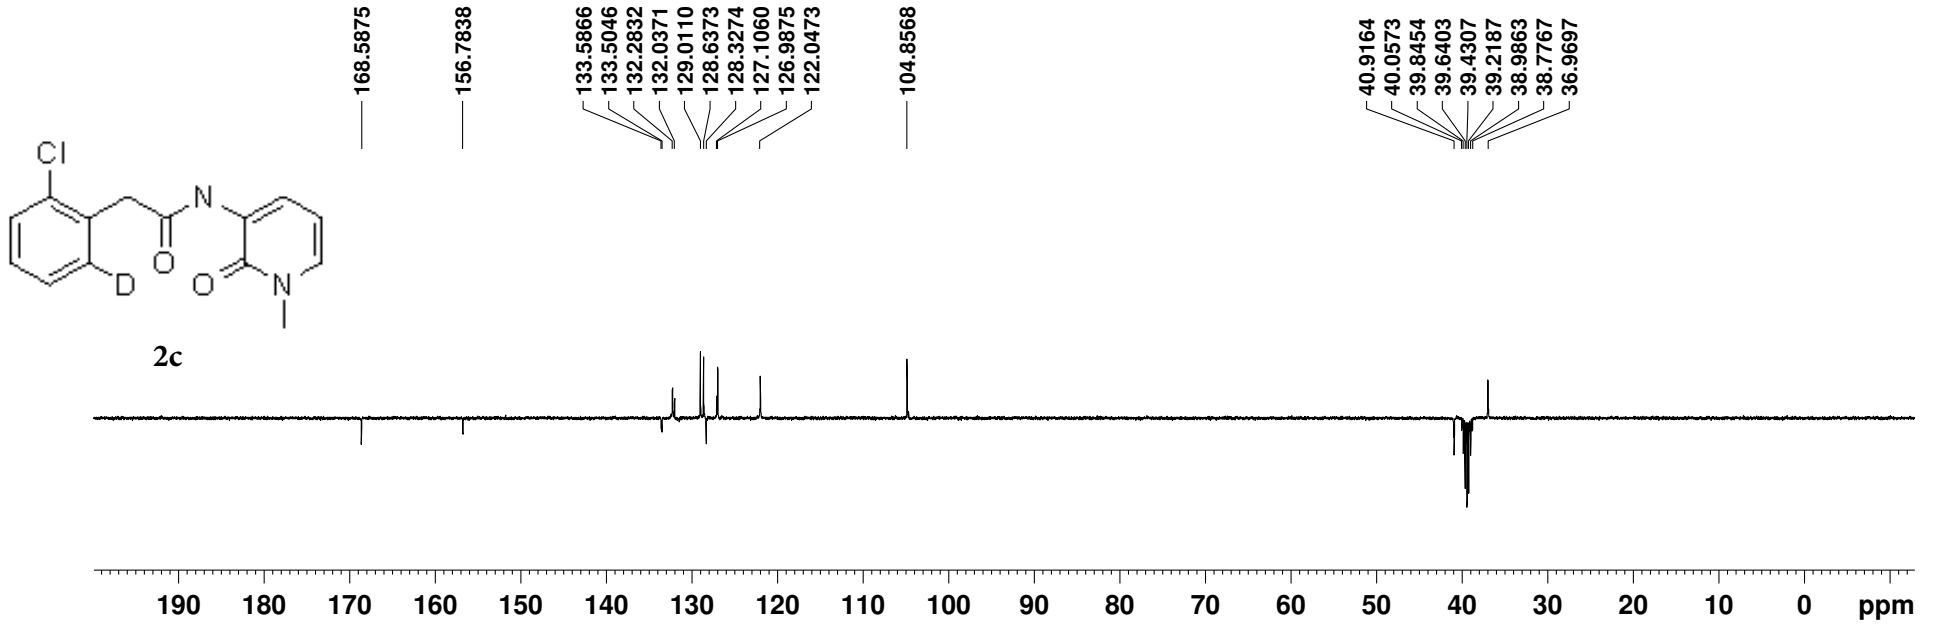

APT of 2c IN DMSO

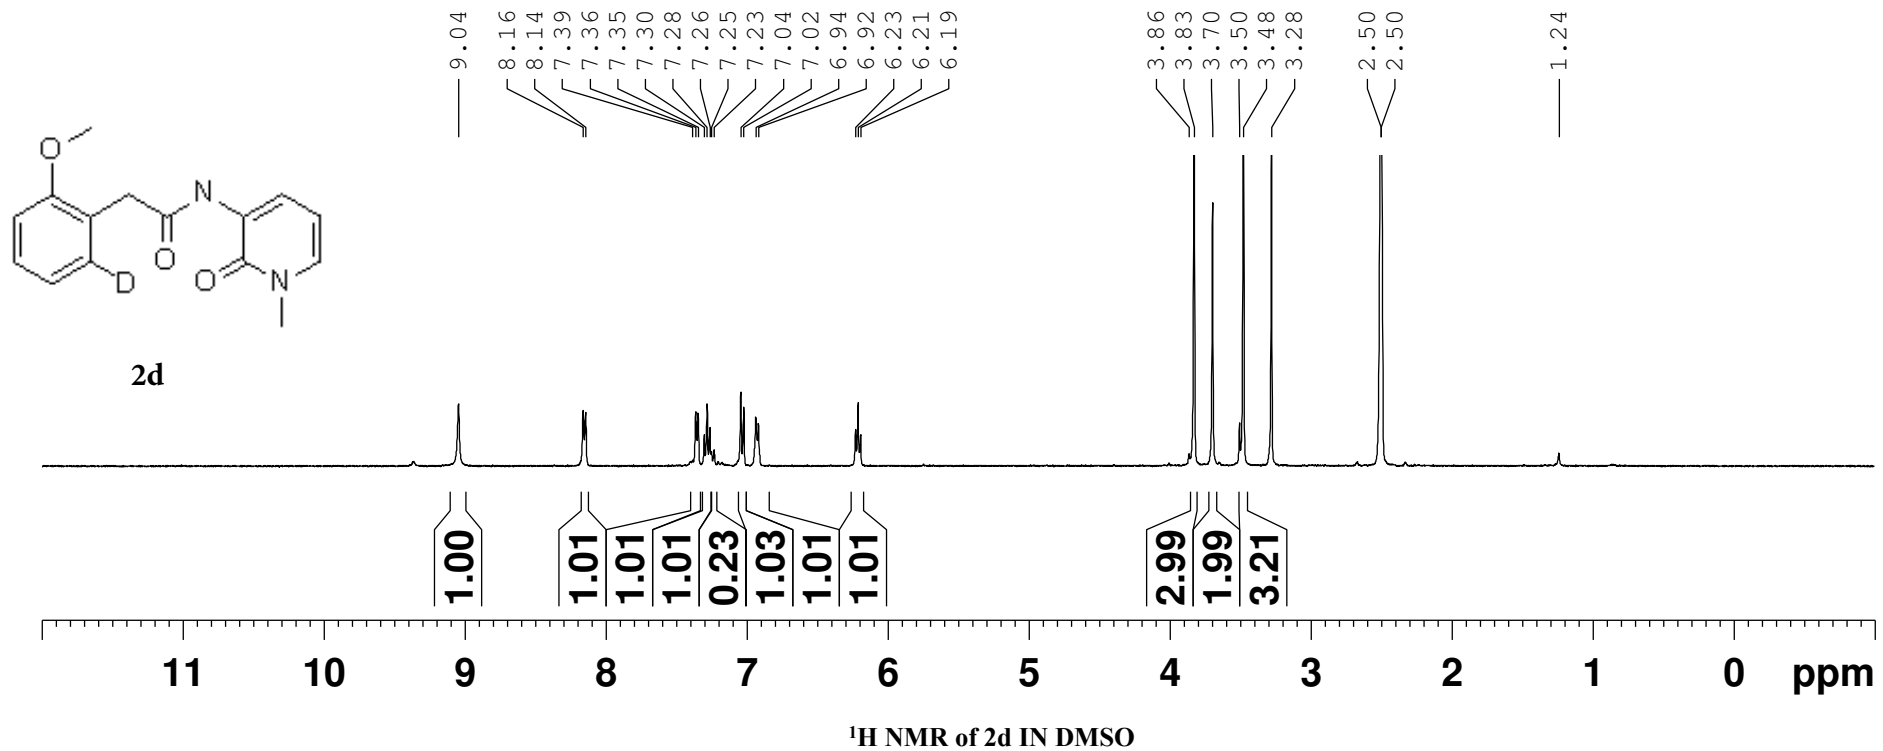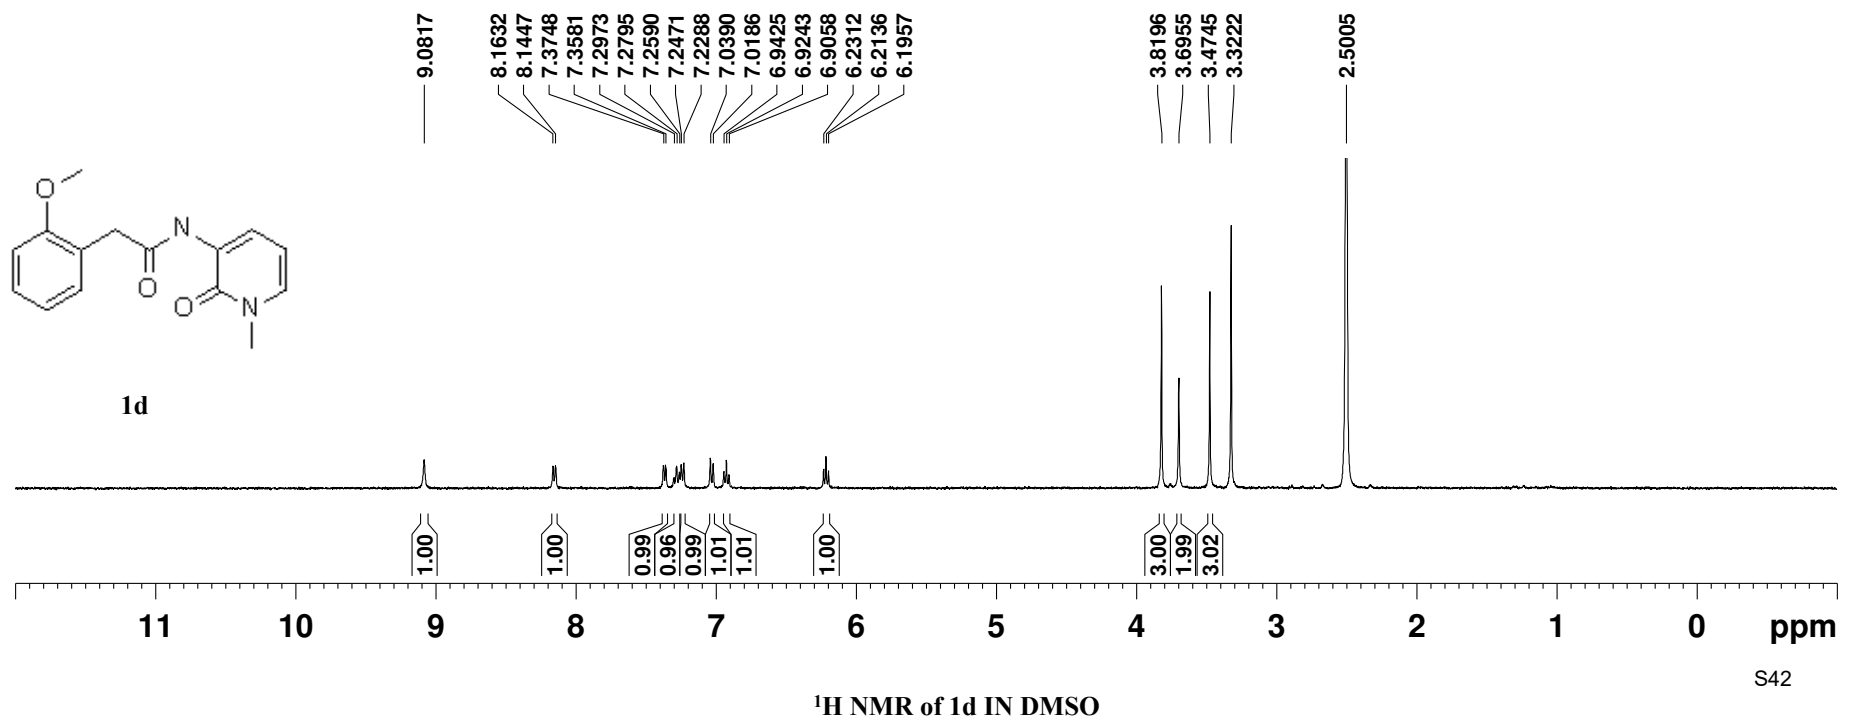

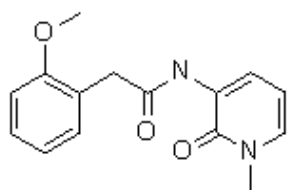

1d

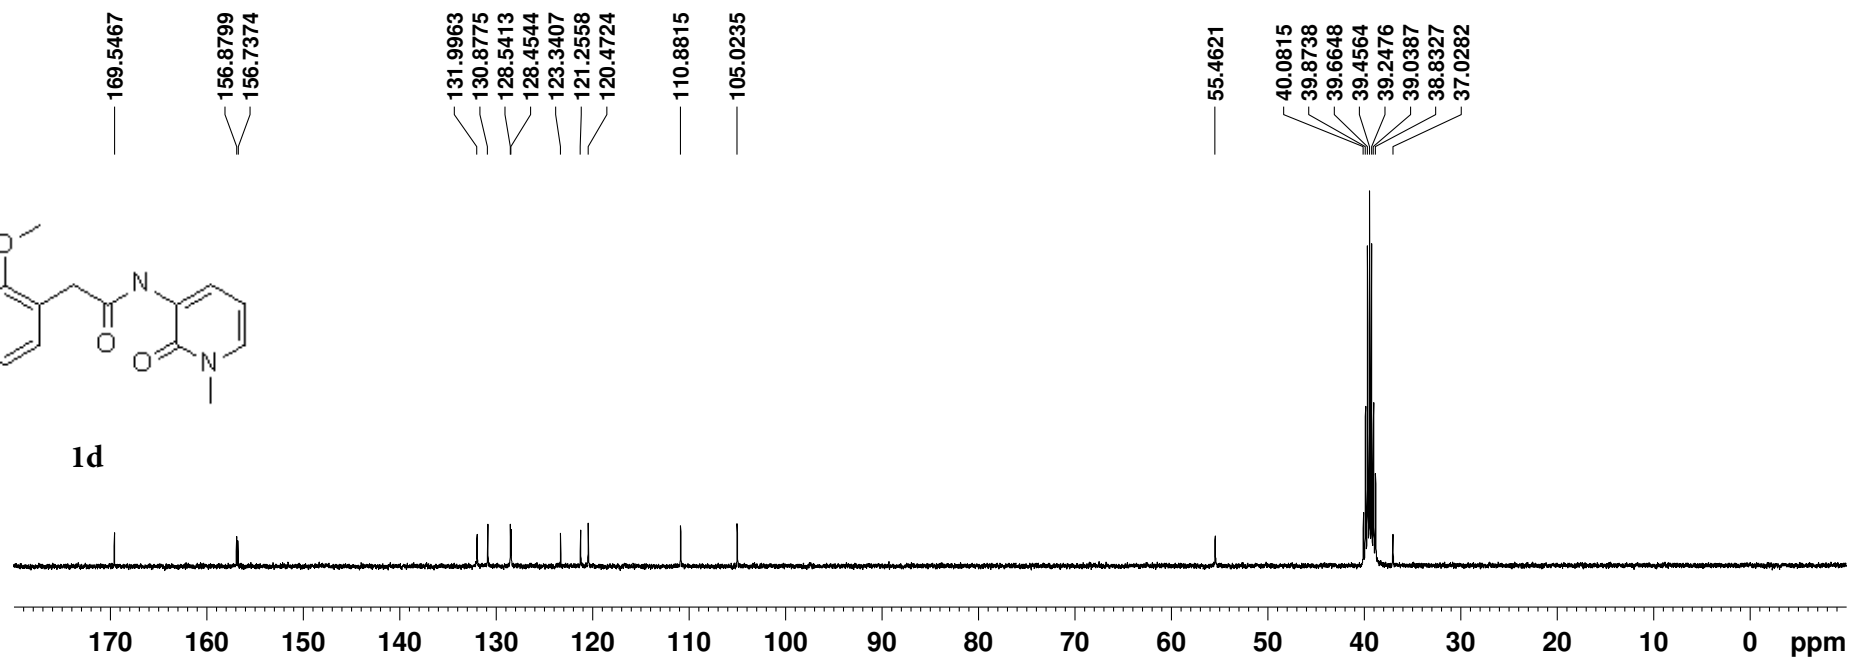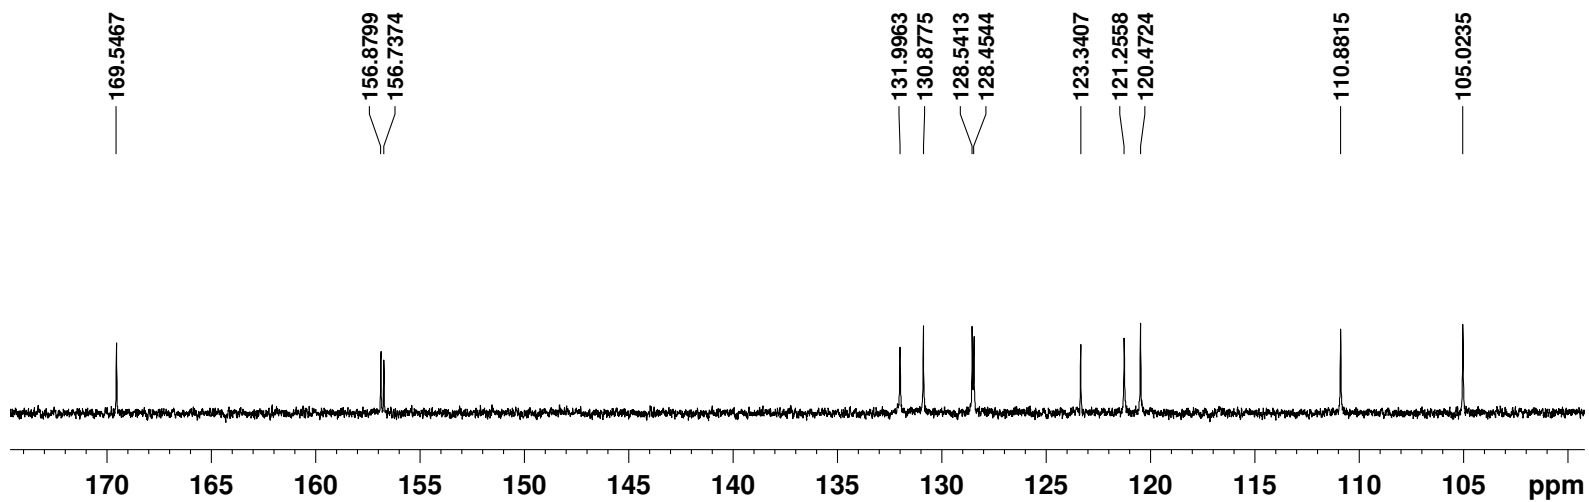

13C NMR of 1d IN DMSO

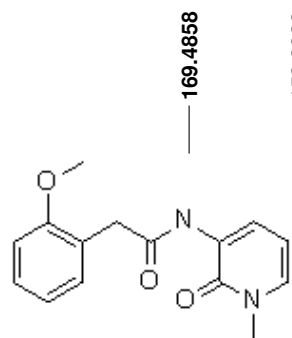

1d

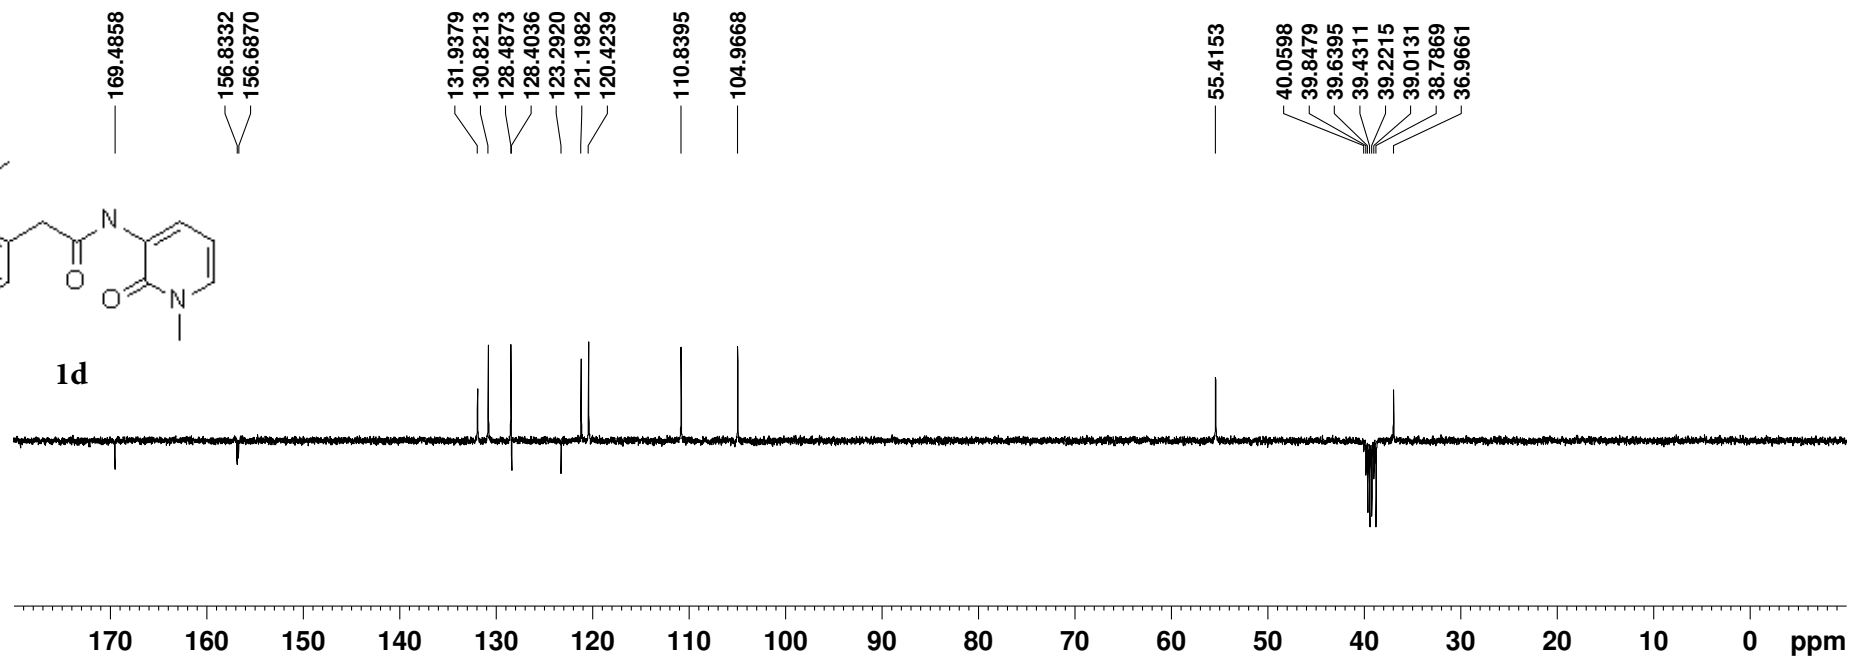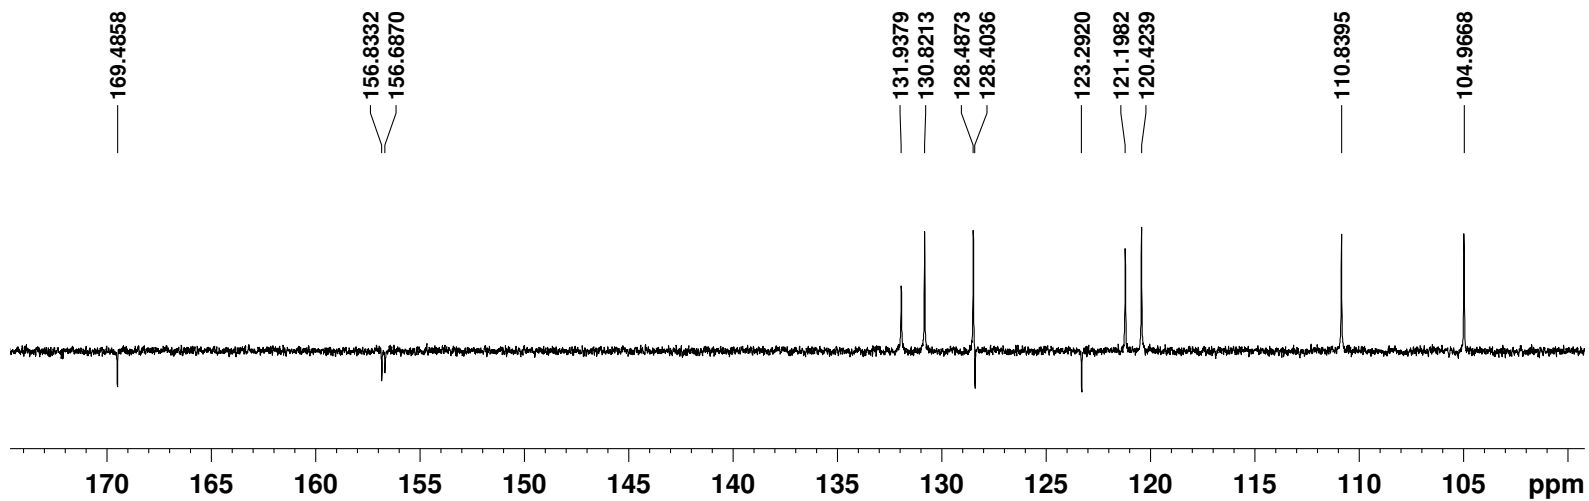

APT of 1d IN DMSO

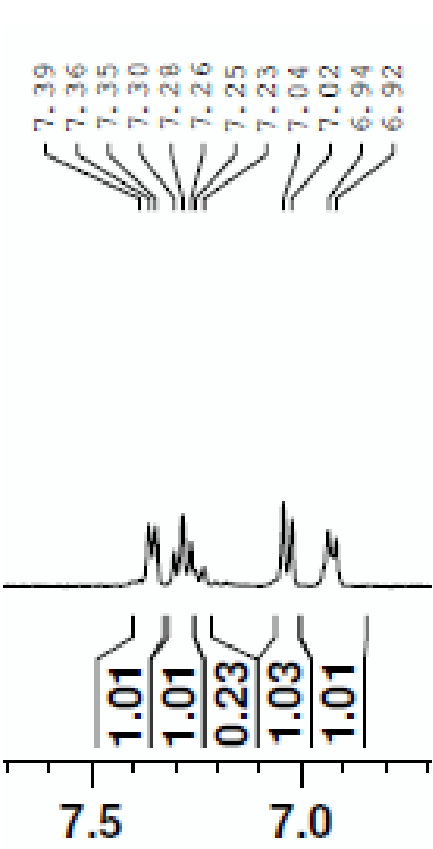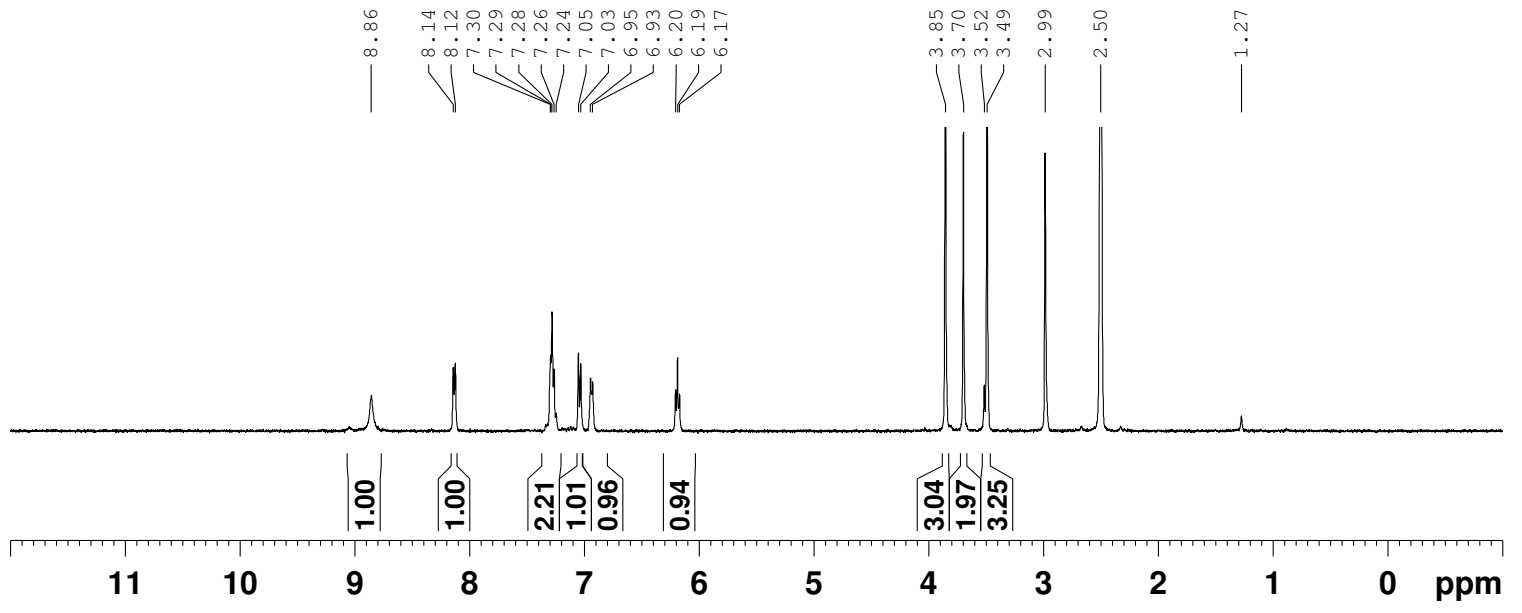

<sup>1</sup>H NMR of 2d IN DMSO AT 100°C

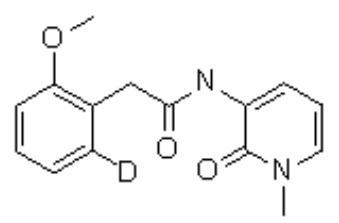

2d

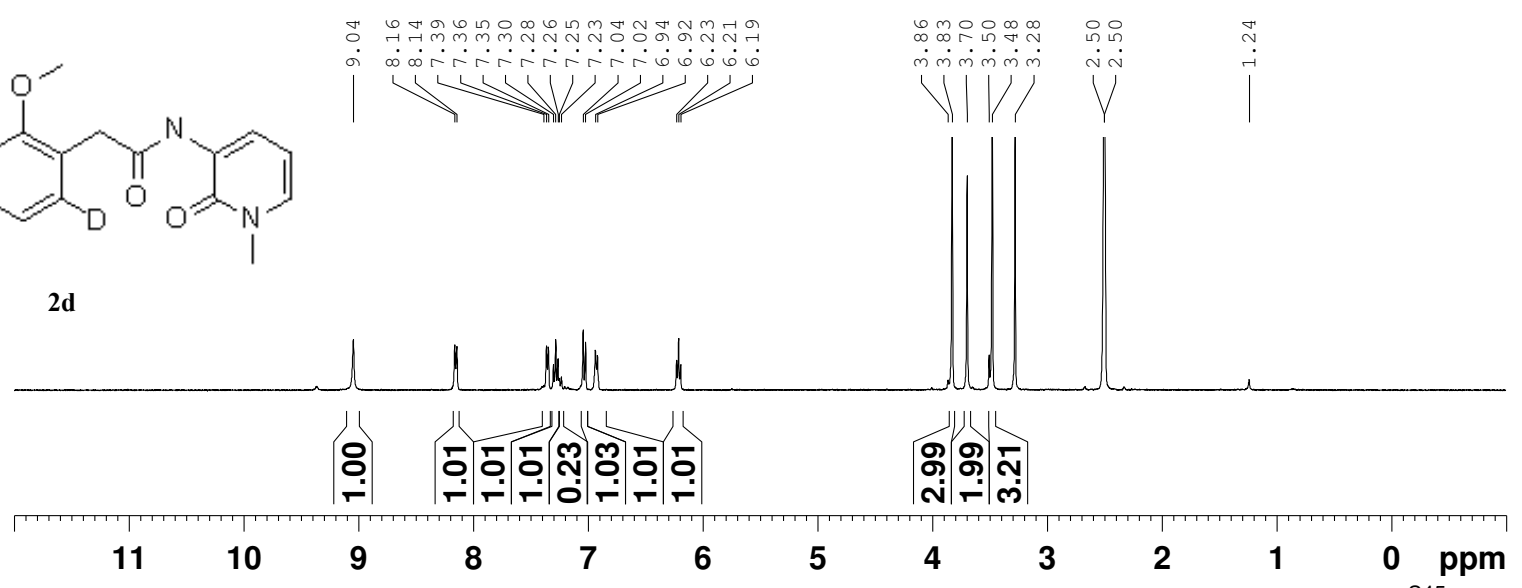

<sup>1</sup>H NMR of 2d IN DMSO AT 20°C

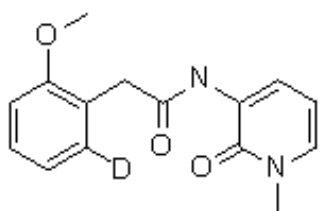

2d

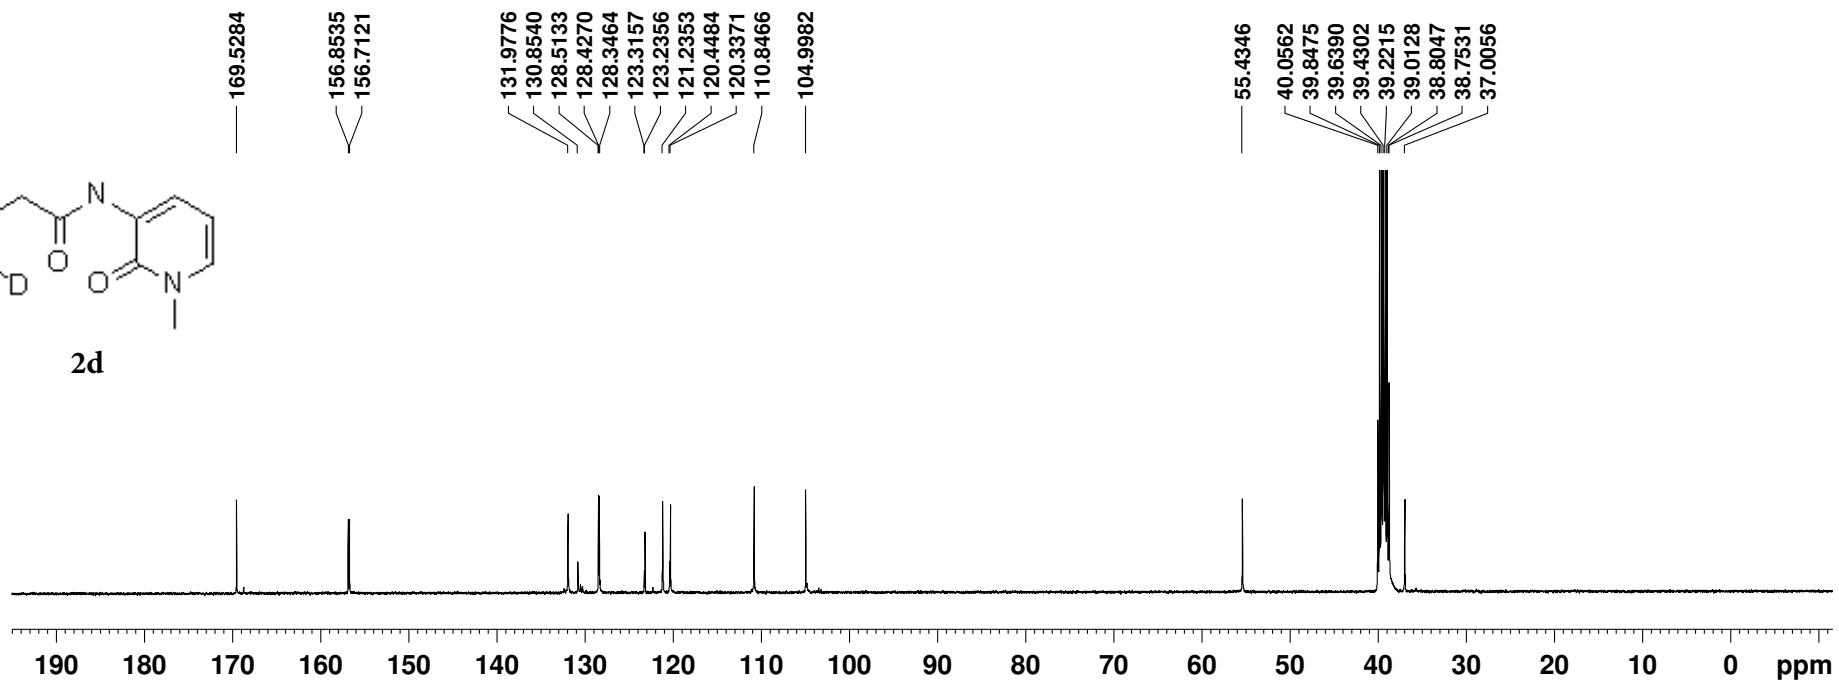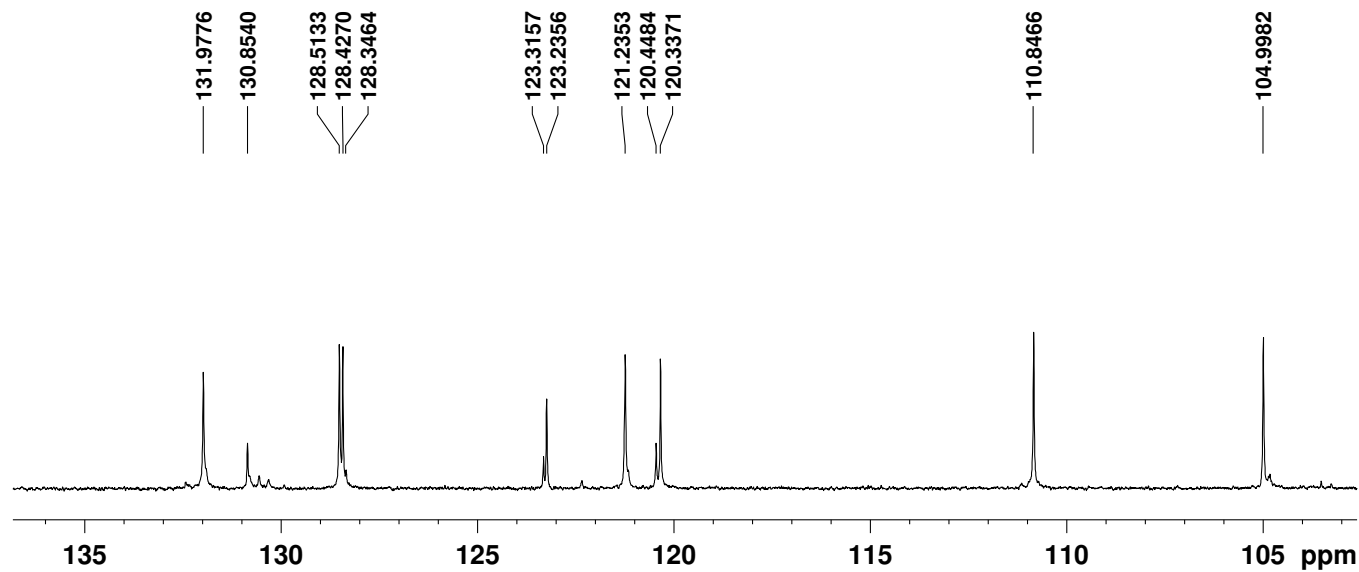

<sup>13</sup>C NMR of 2d IN DMSO

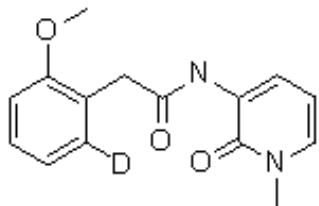

2d

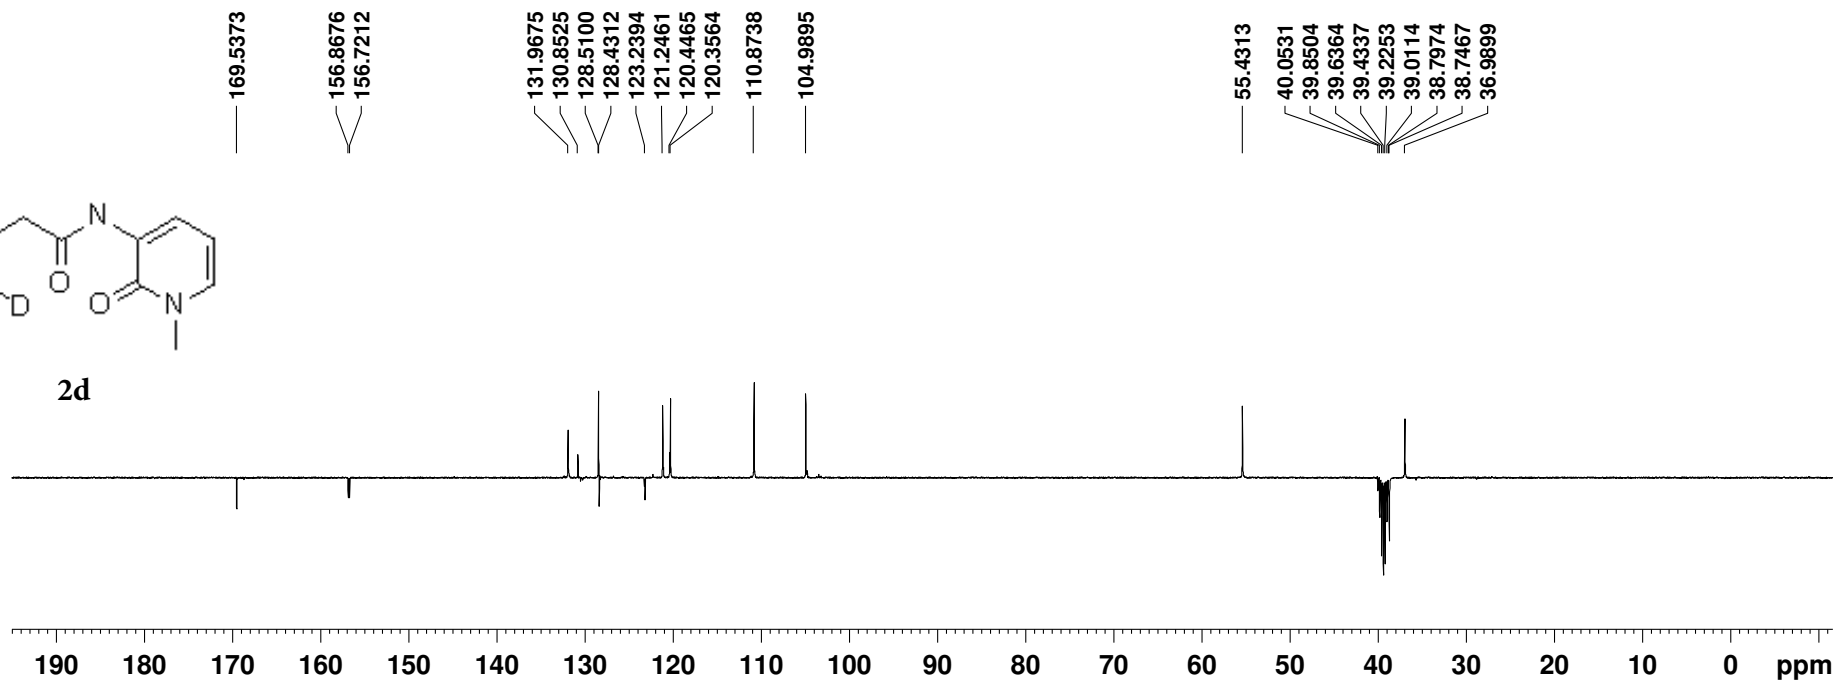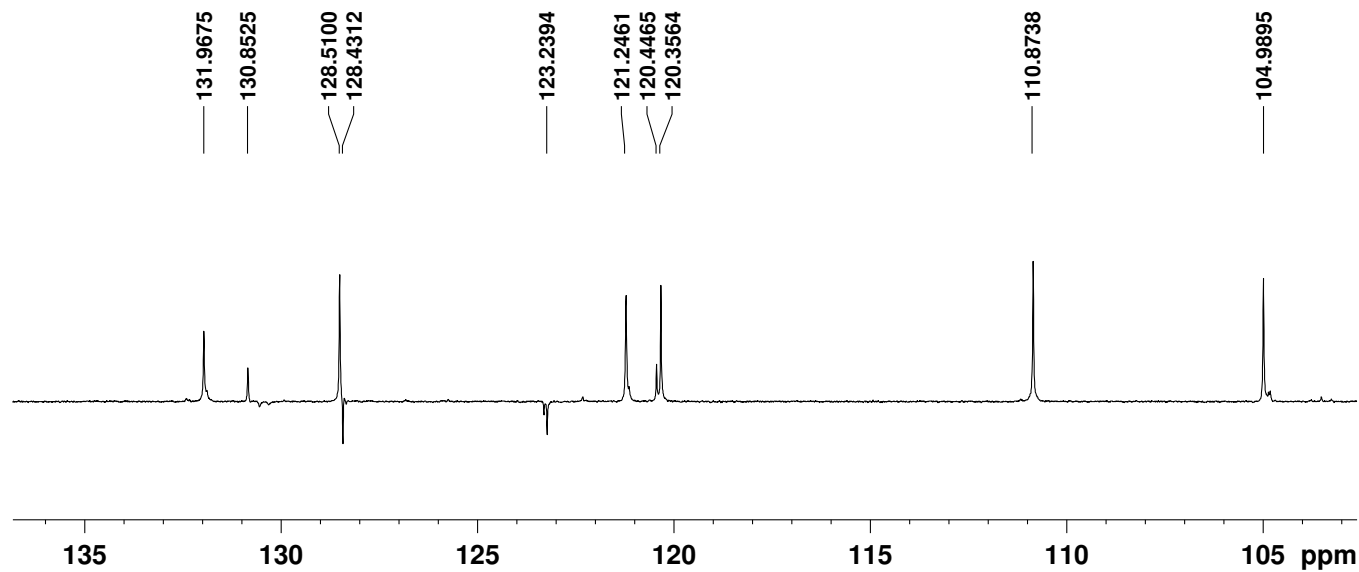

APT of 2d IN DMSO

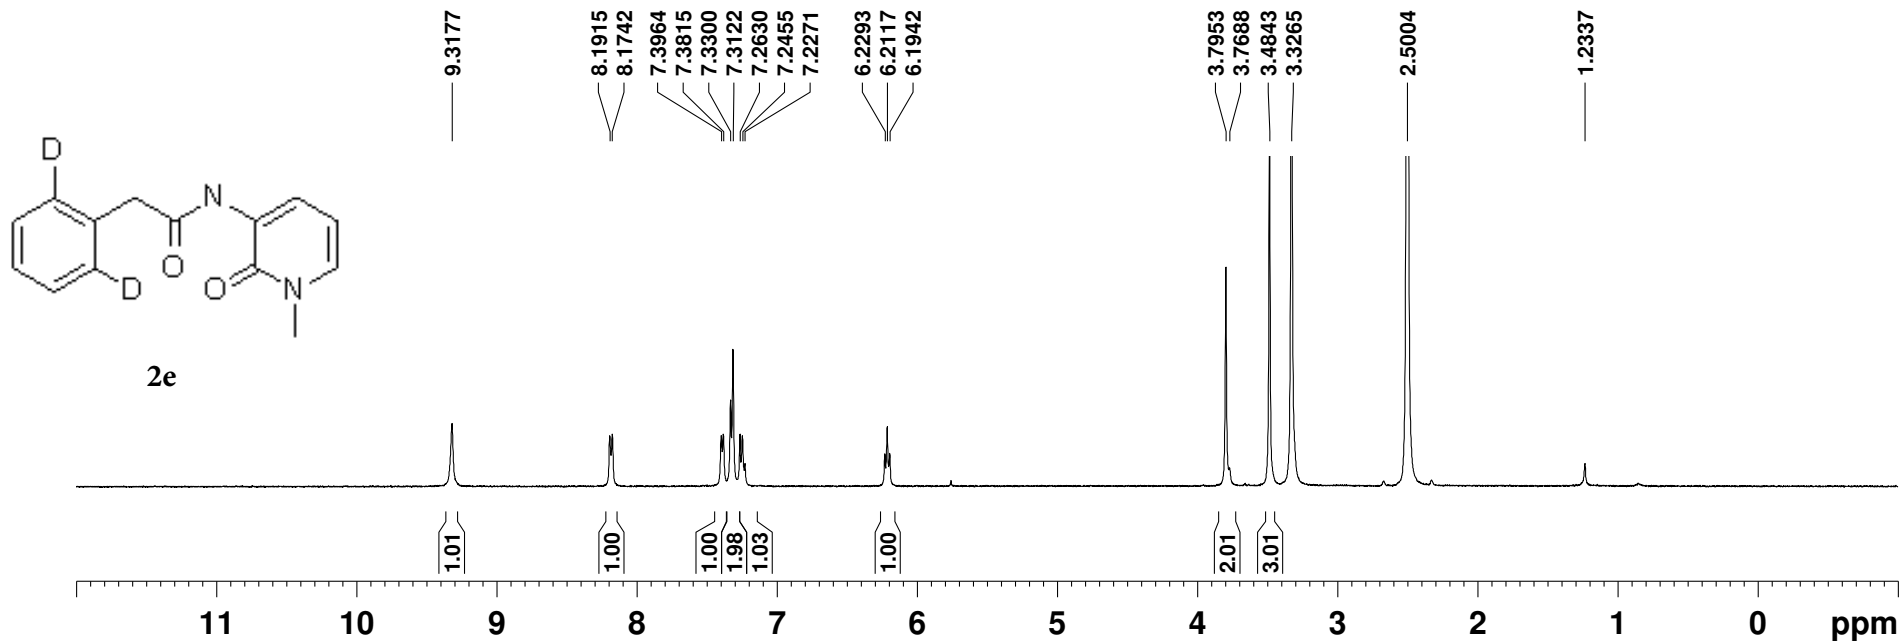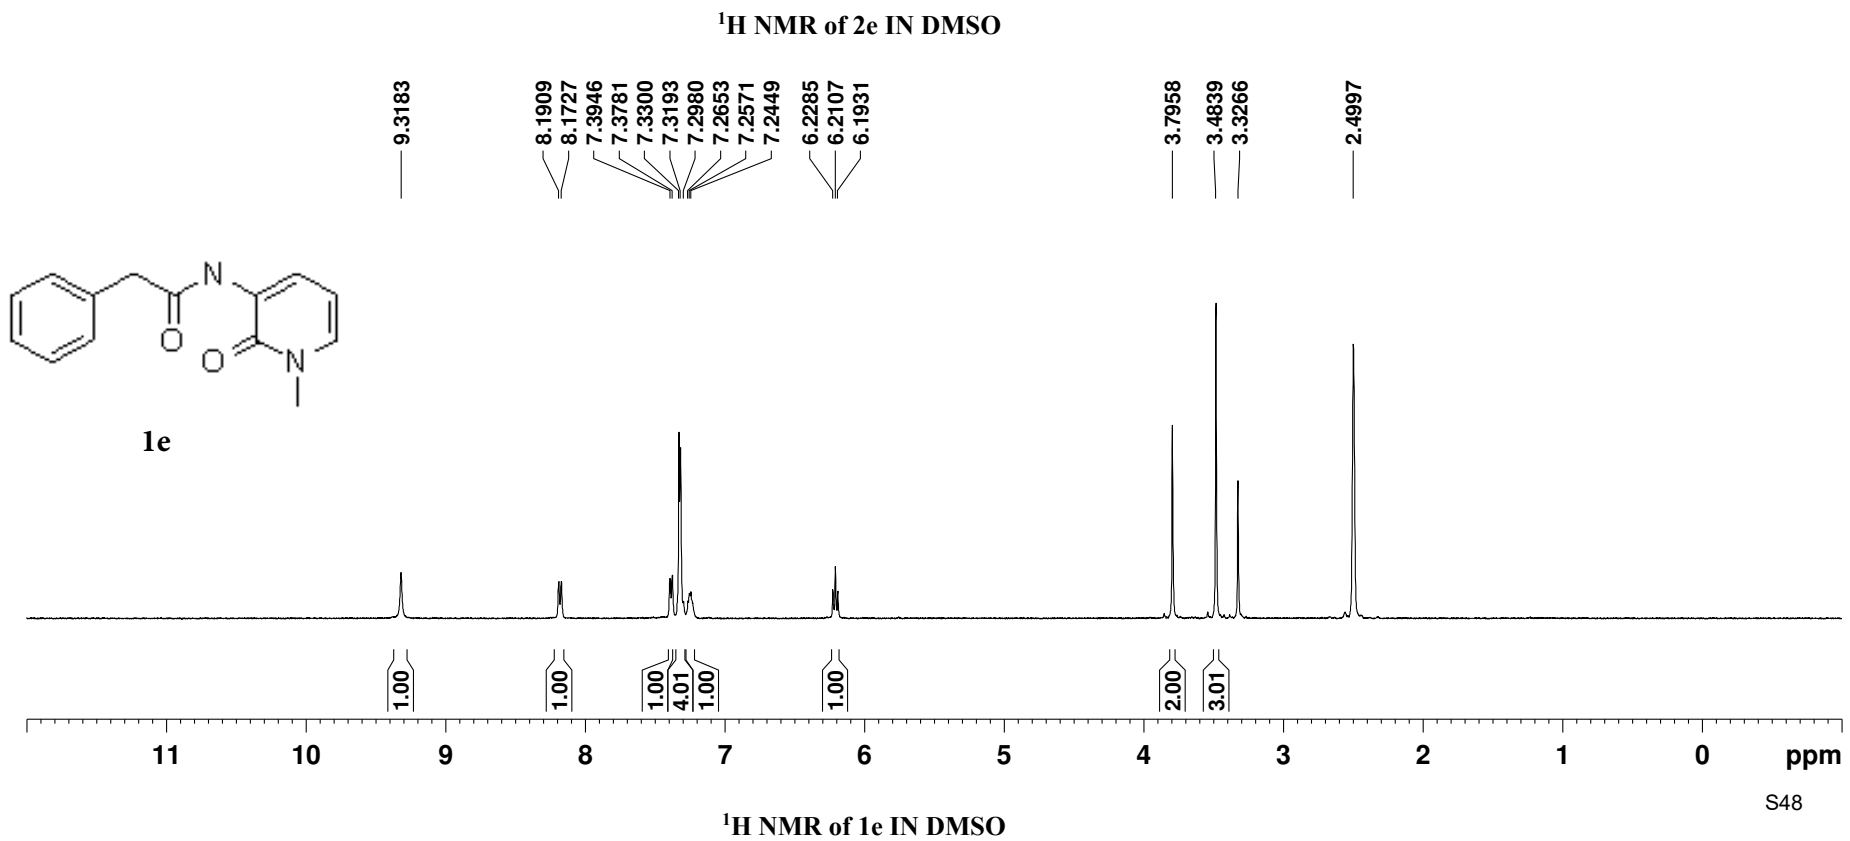



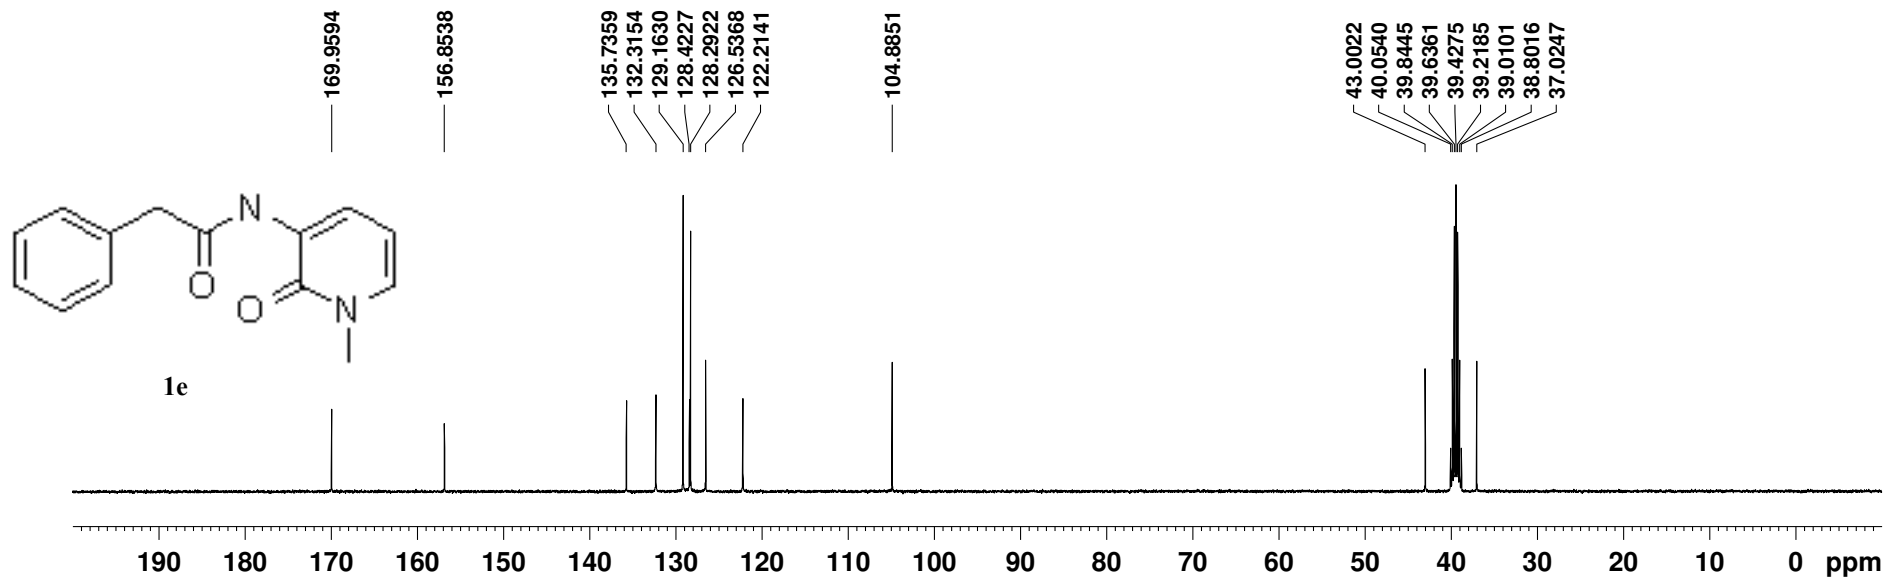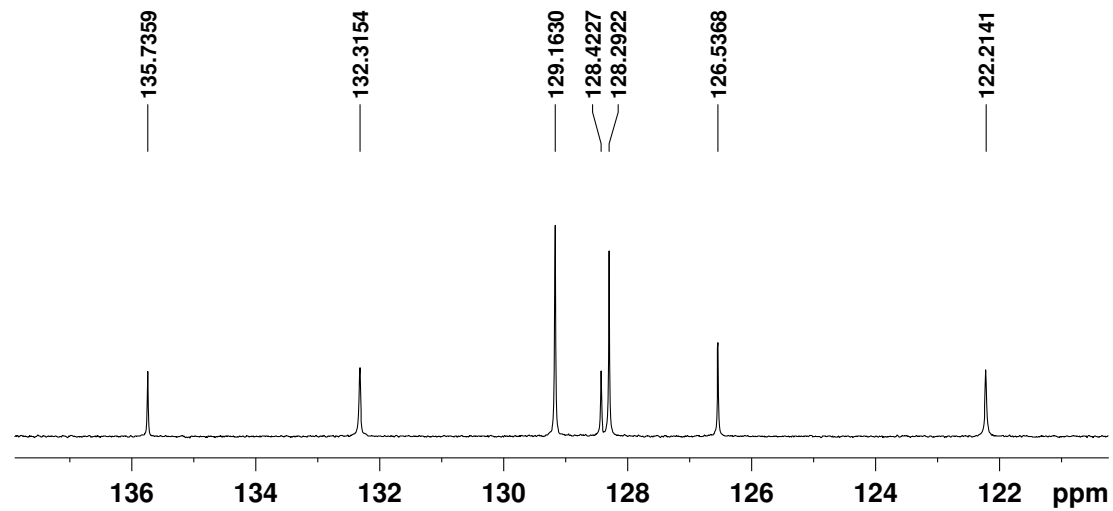

<sup>13</sup>C NMR of **1e** IN DMSO

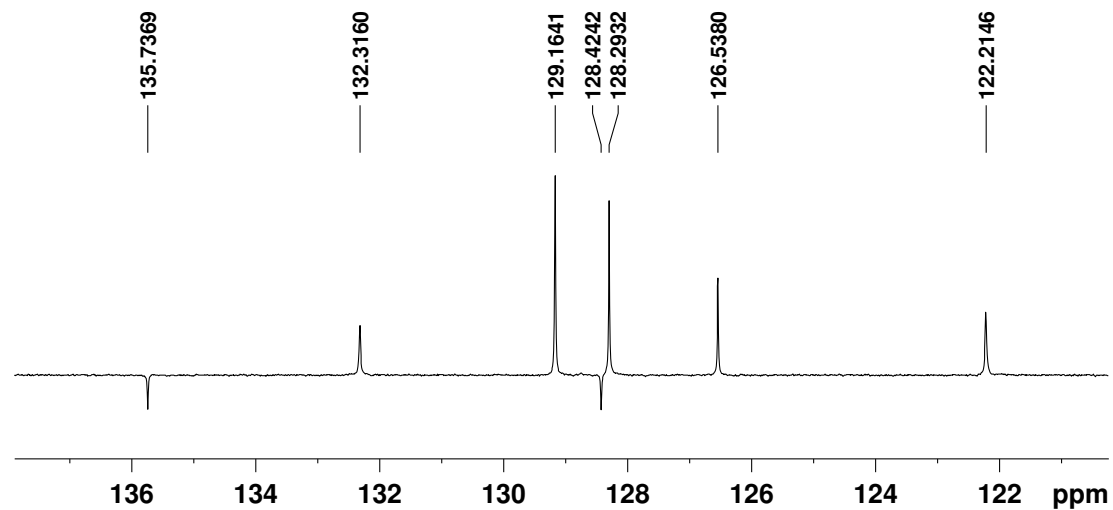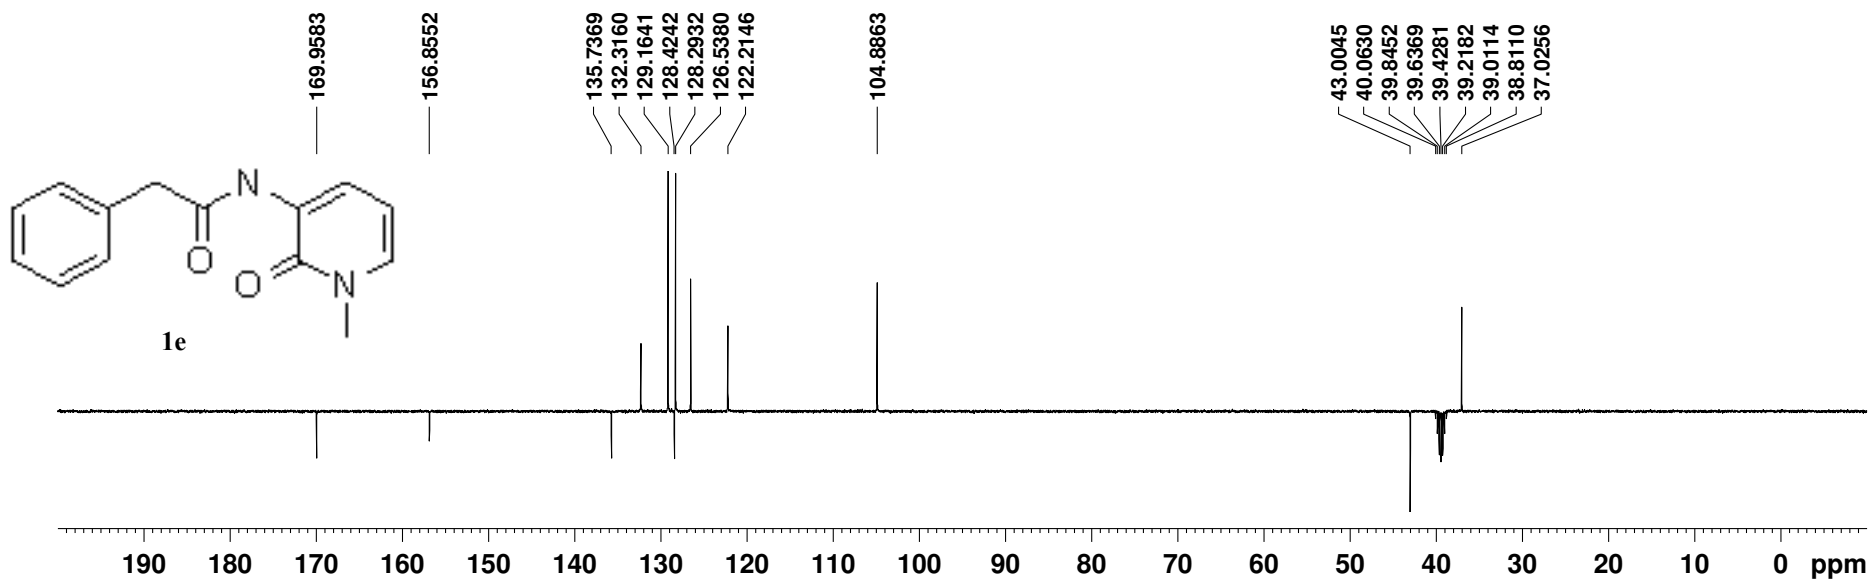

APT of 1e IN DMSO

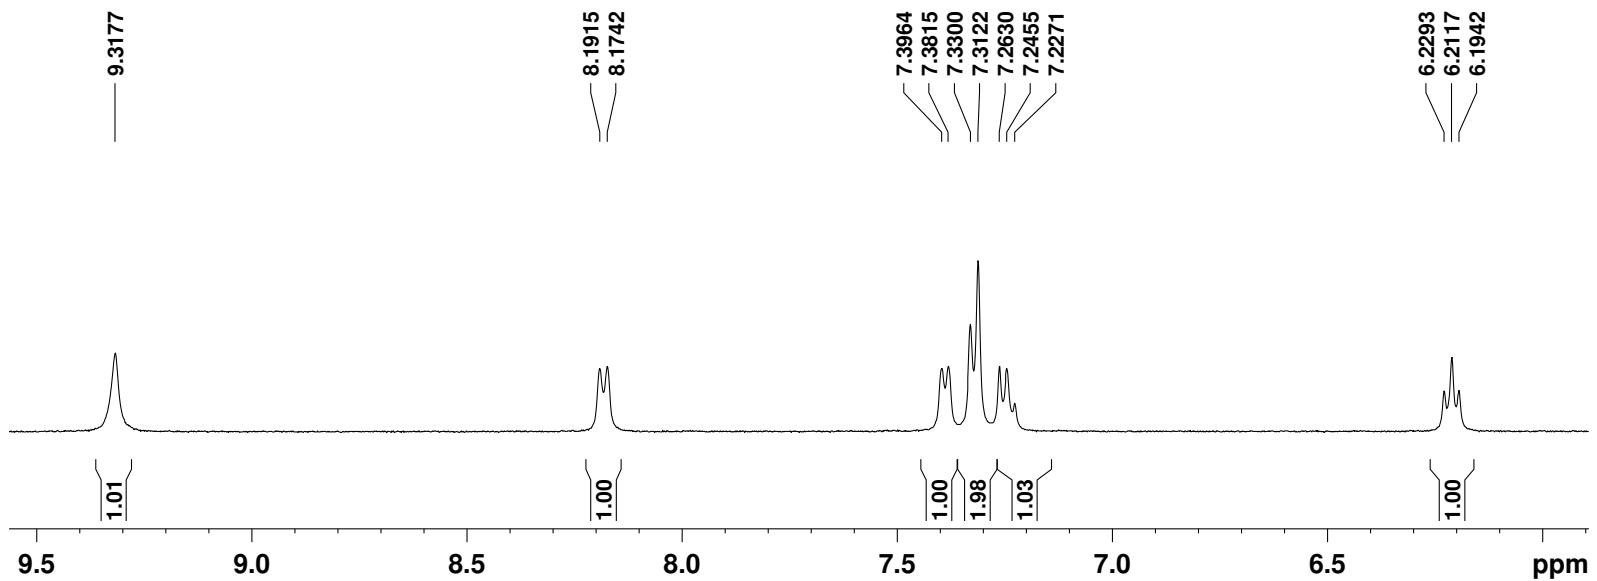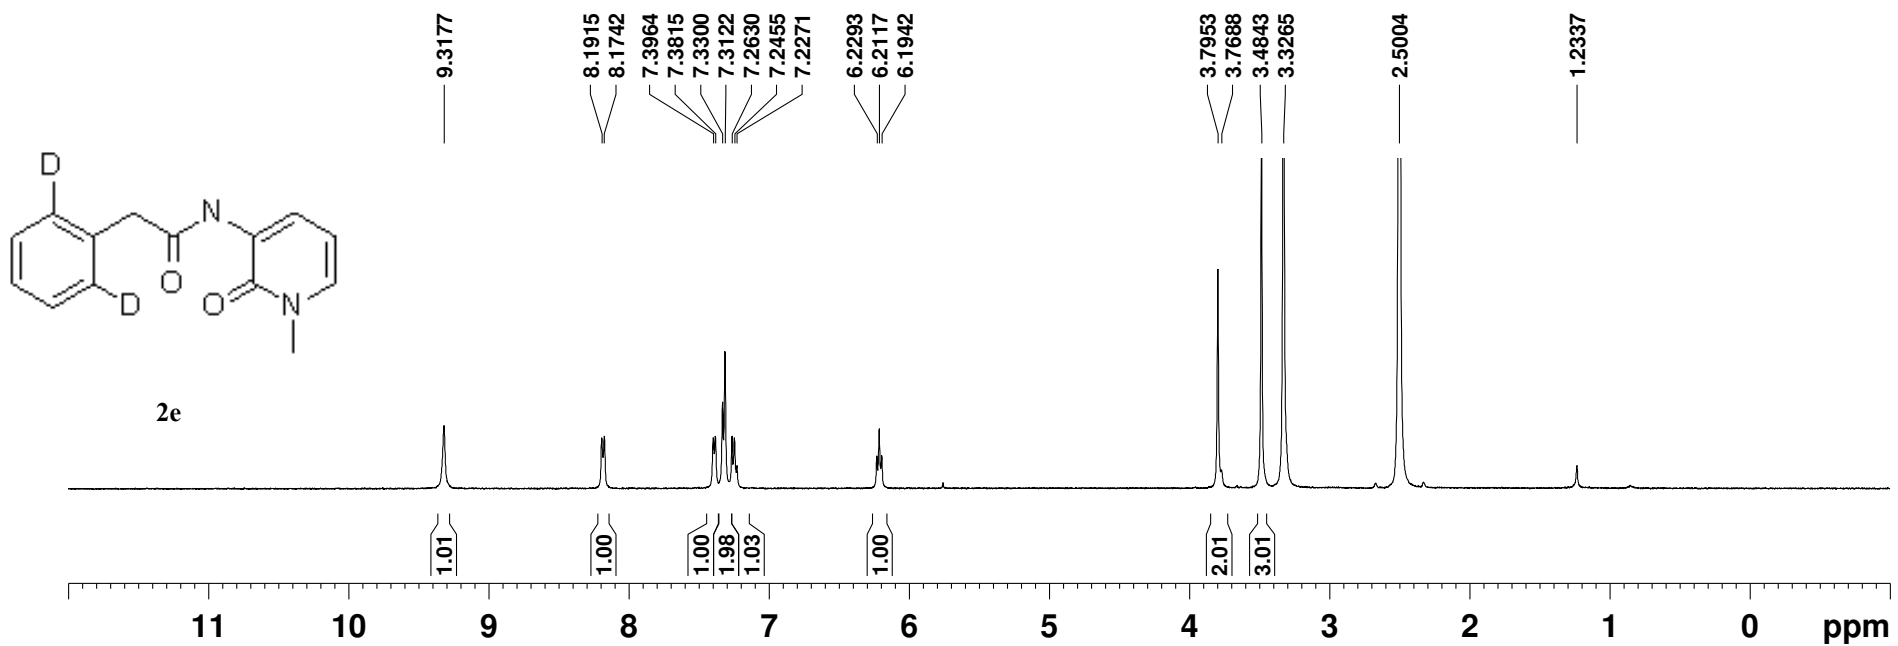

<sup>1</sup>H NMR of 2e IN DMSO

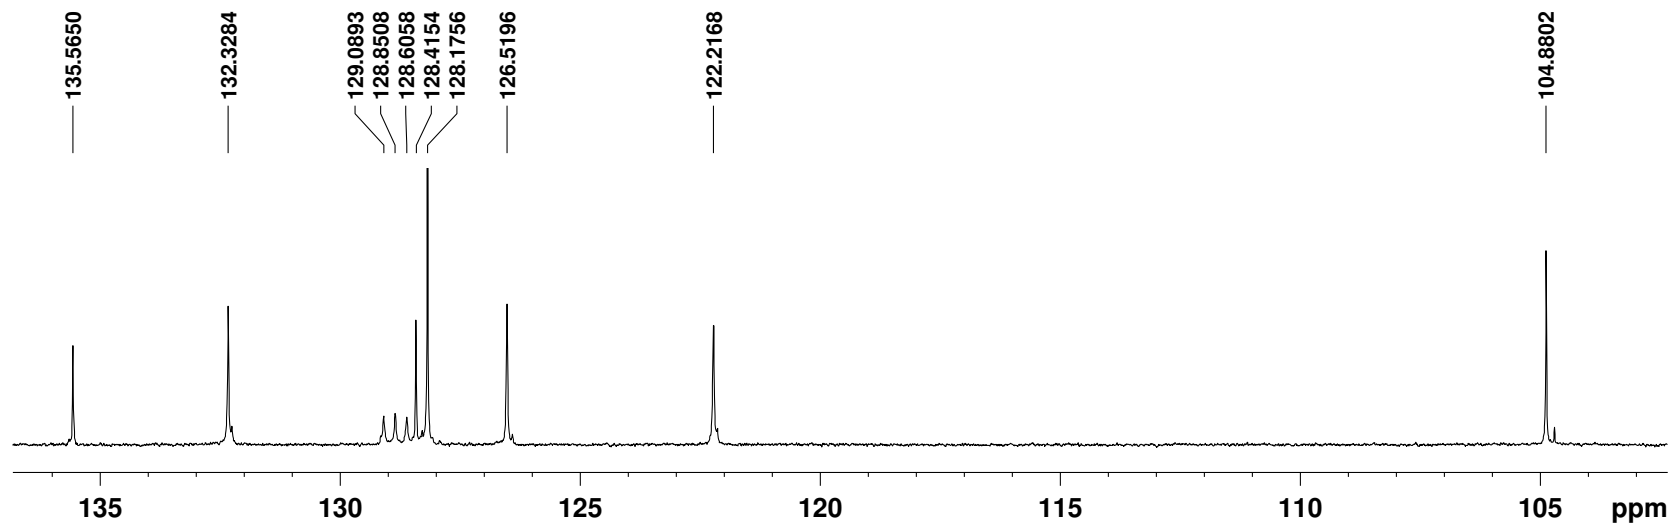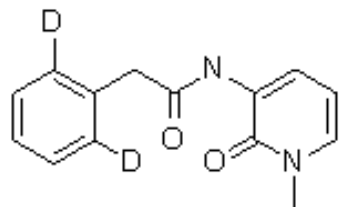

2e

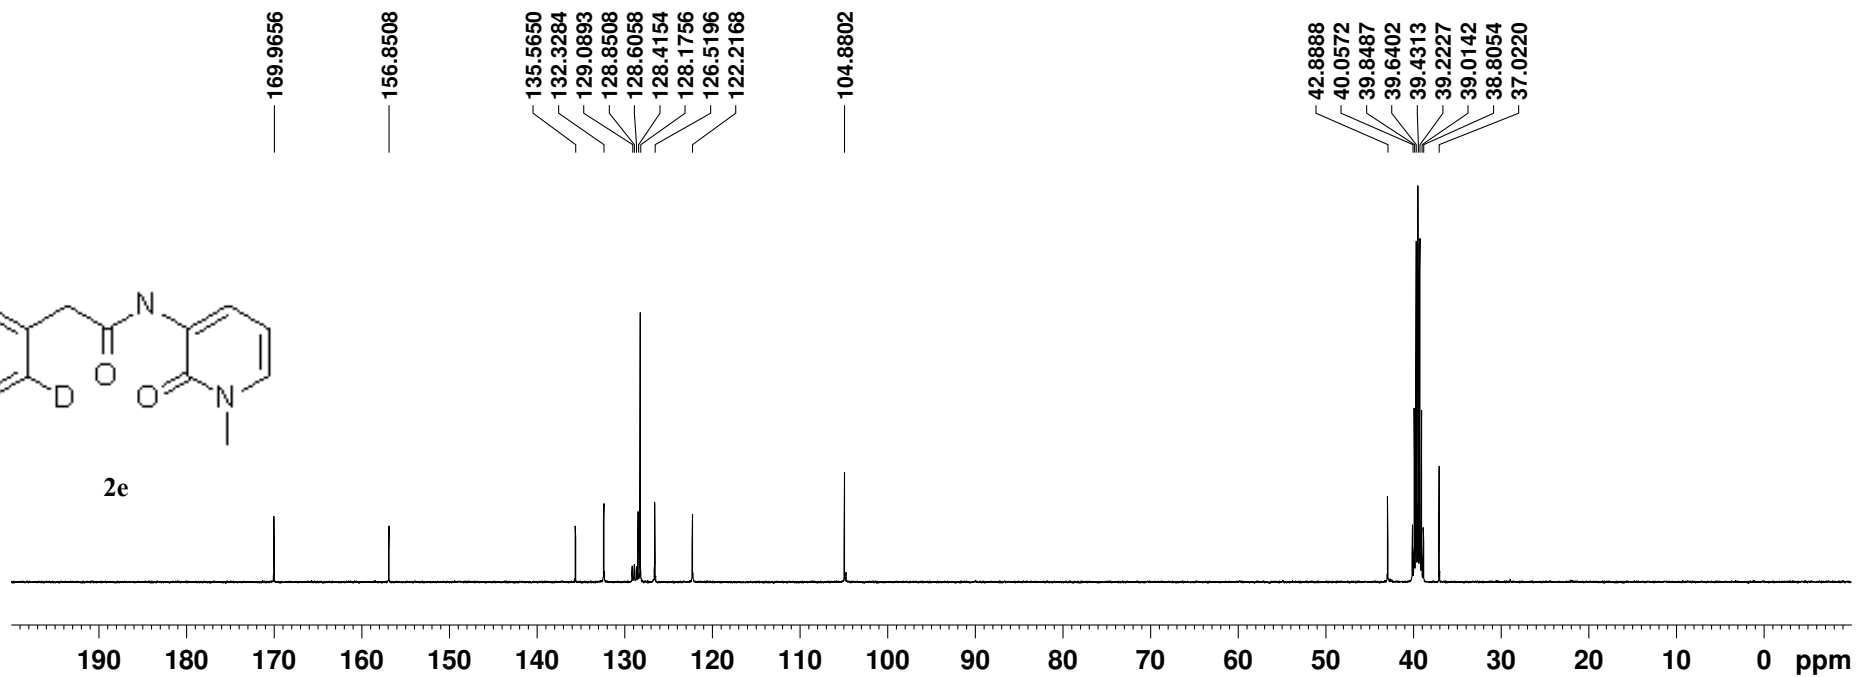

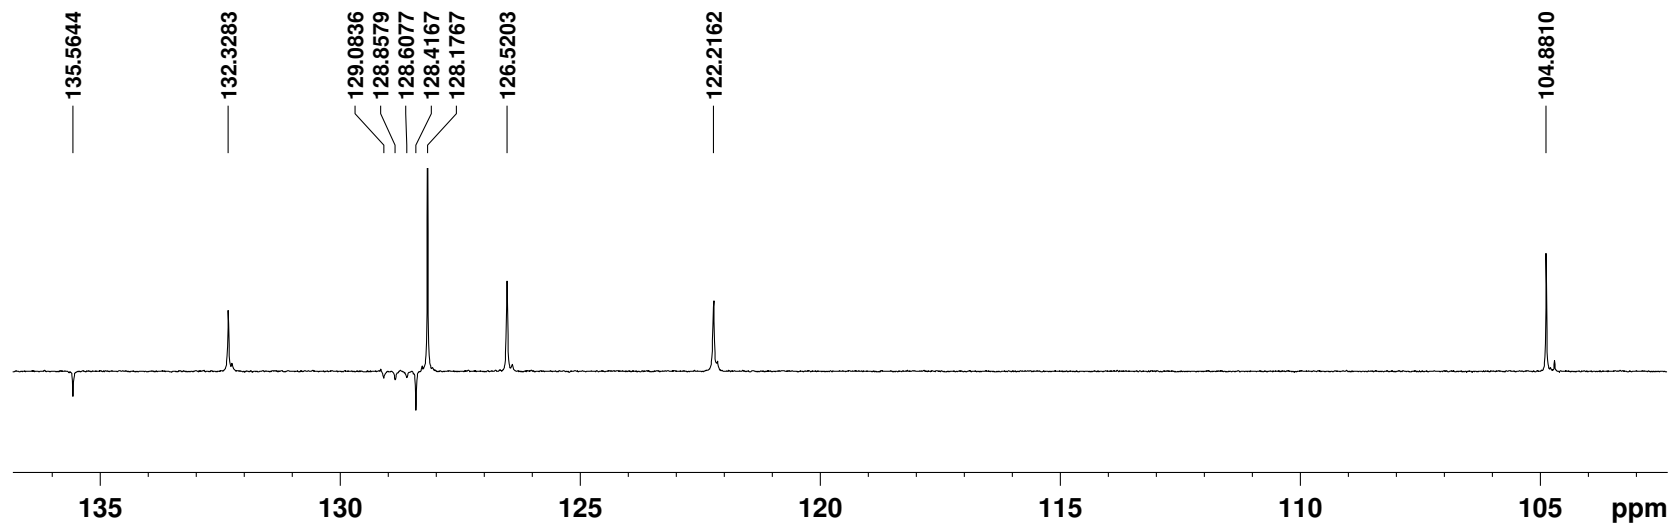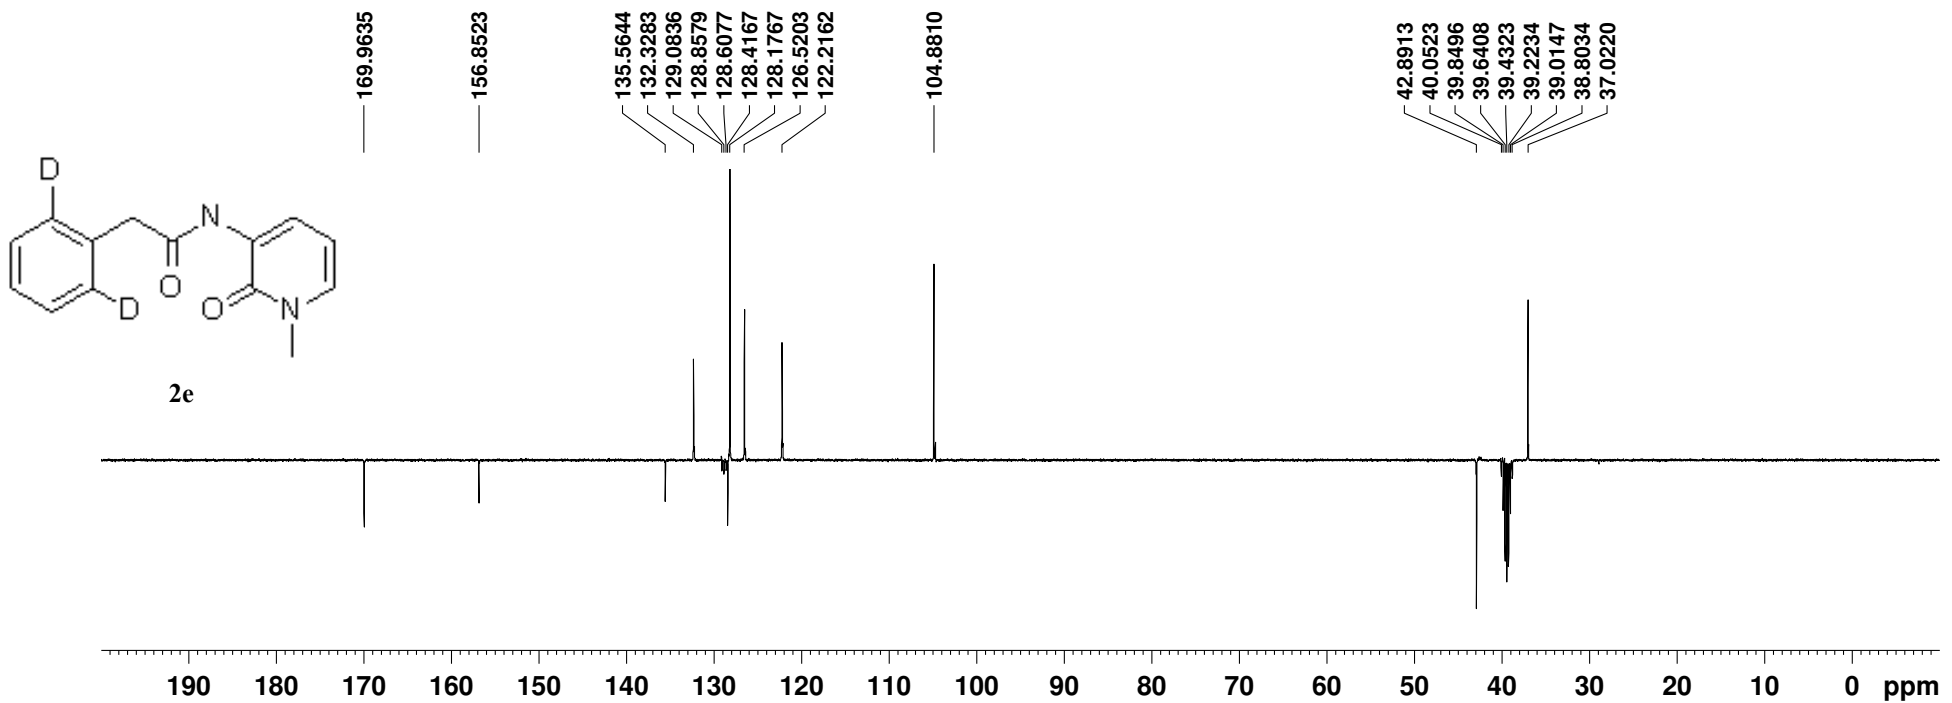

APT of 2e IN DMSO

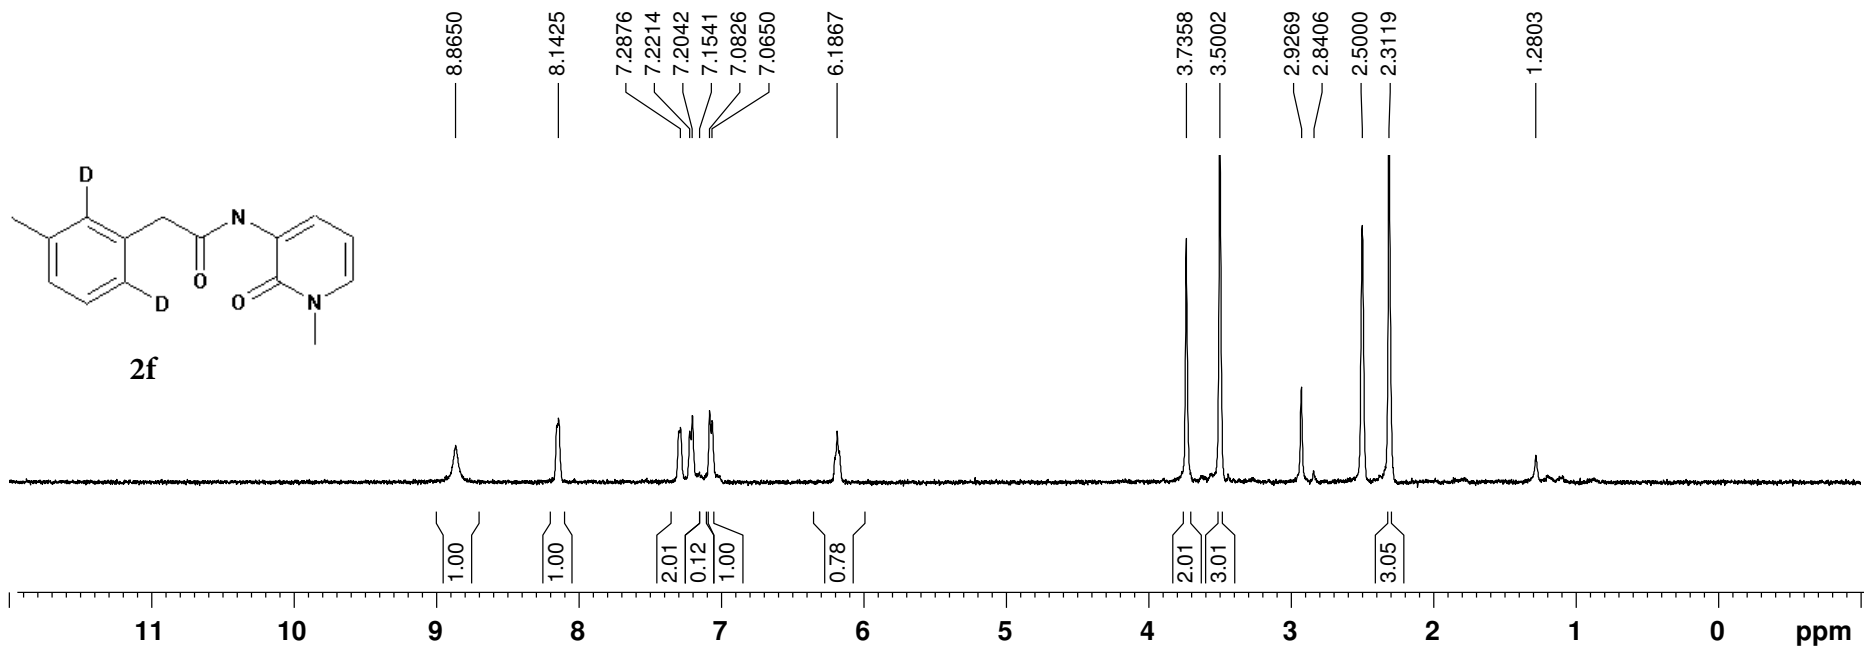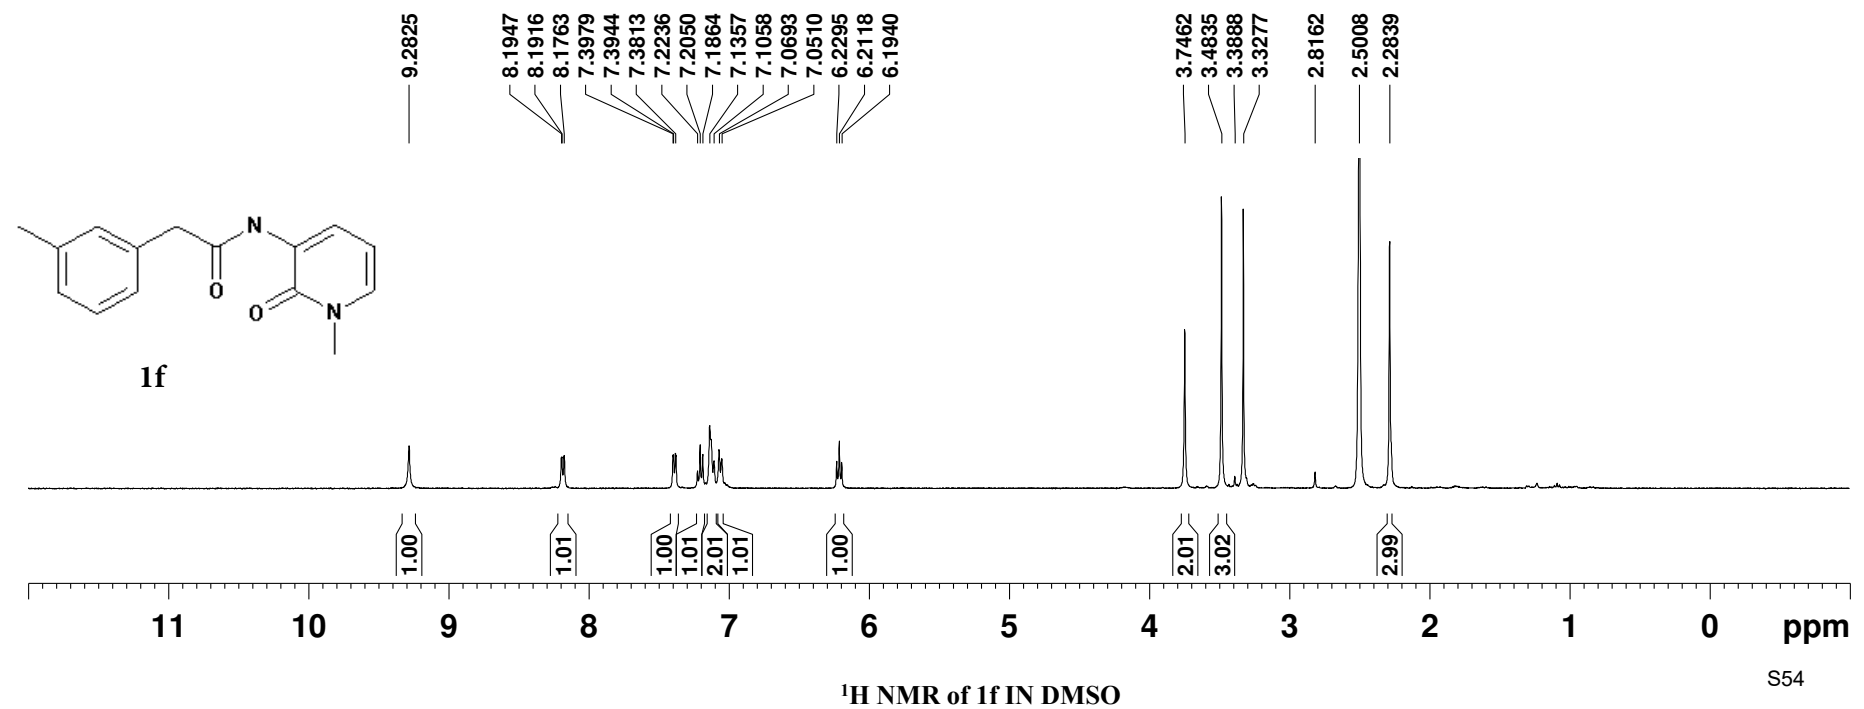

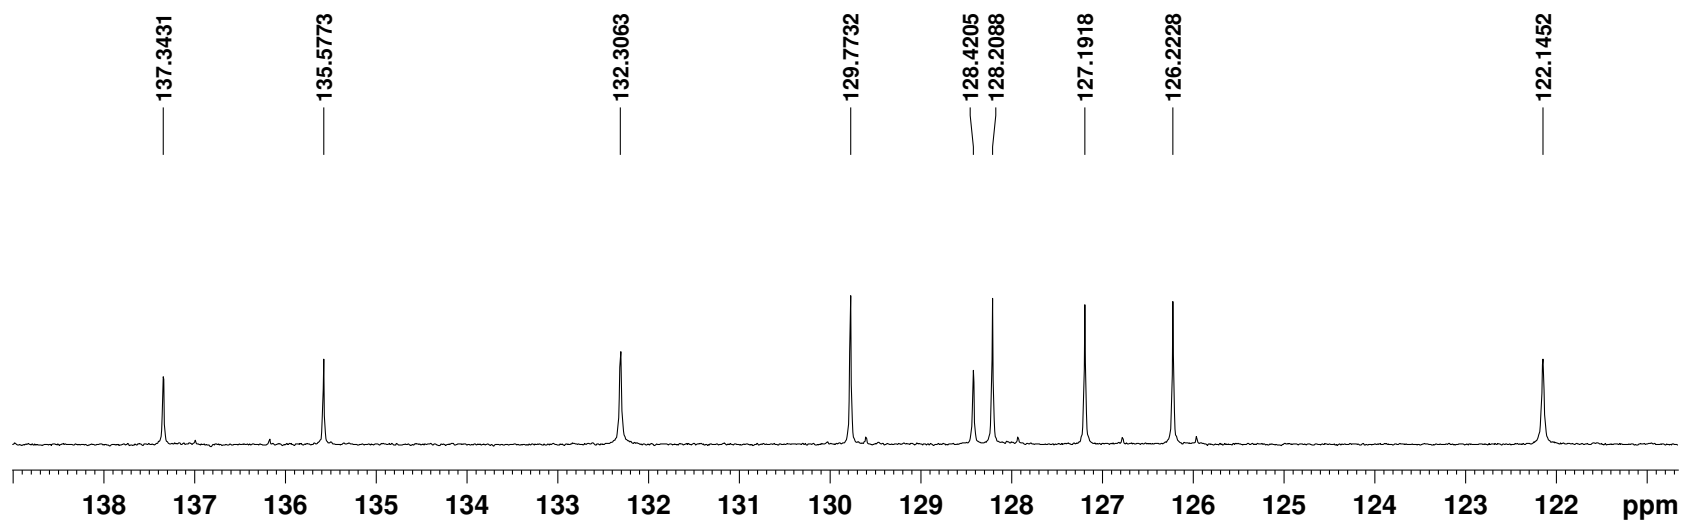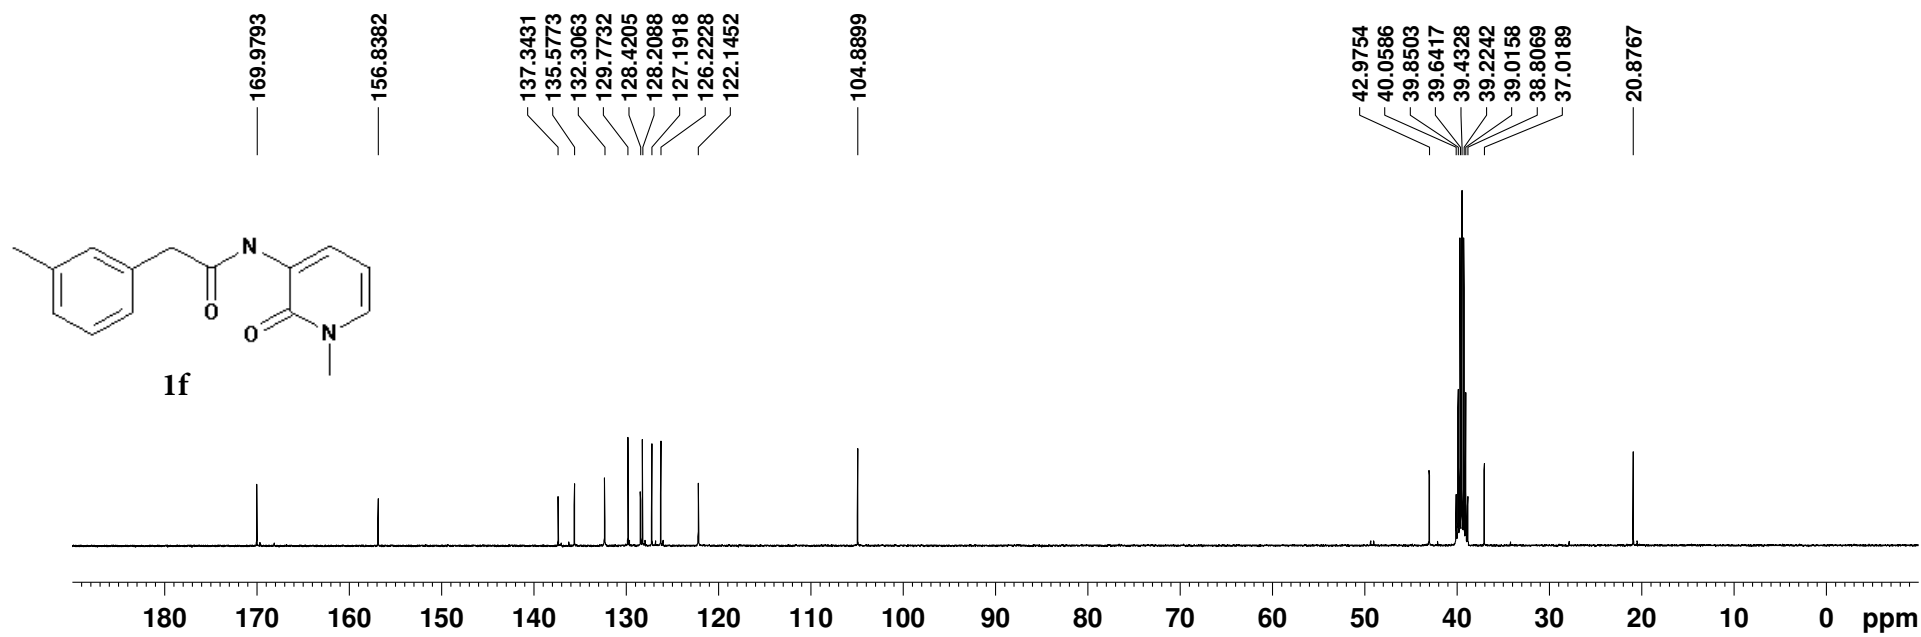

$^{13}\text{C}$  NMR of 1f IN DMSO

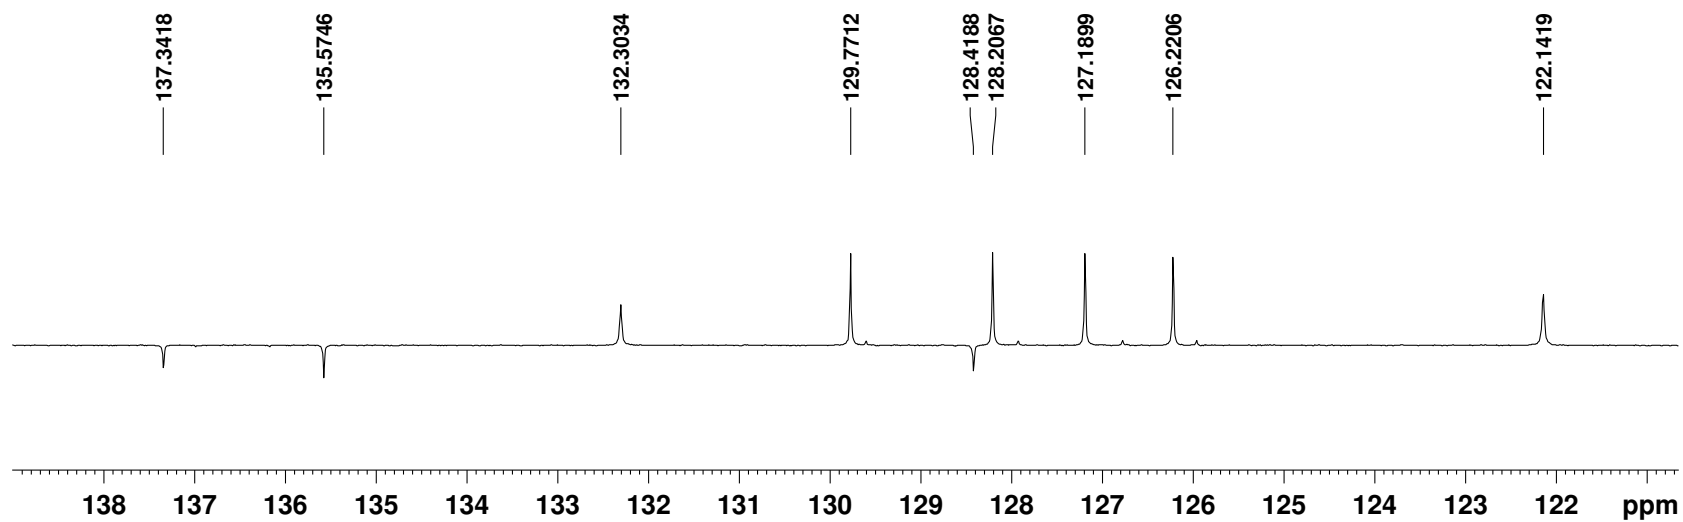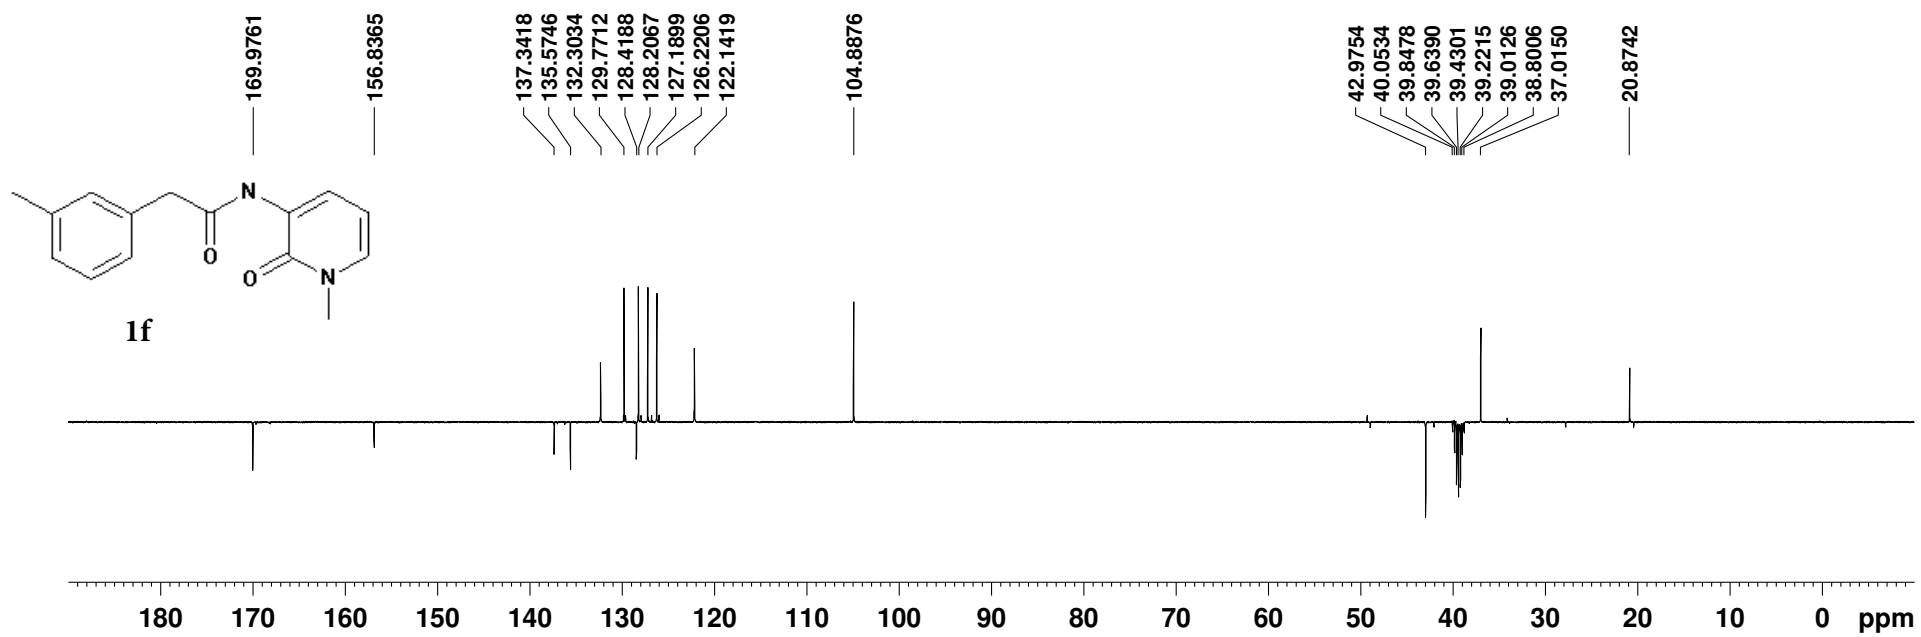



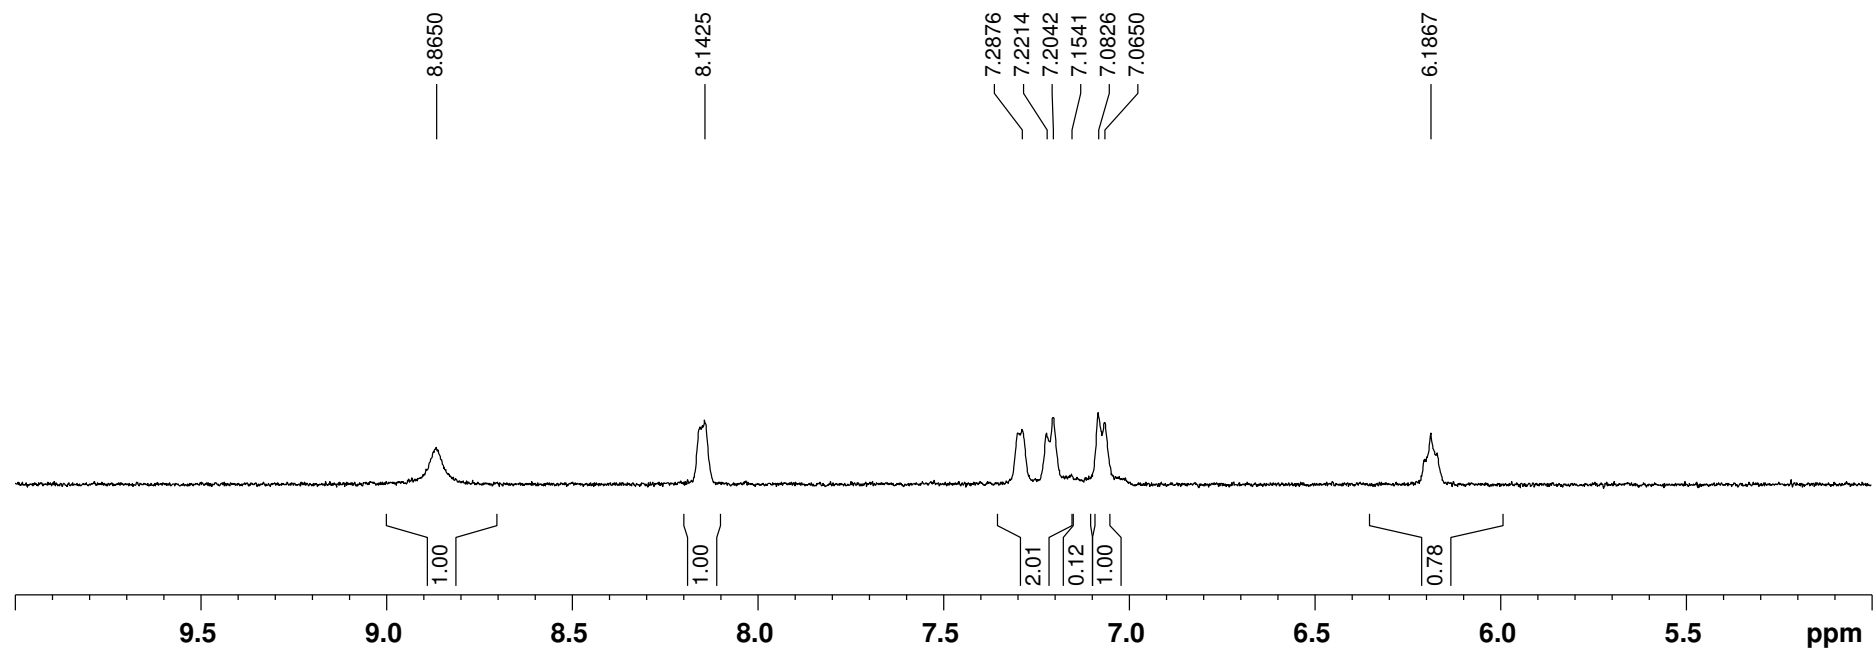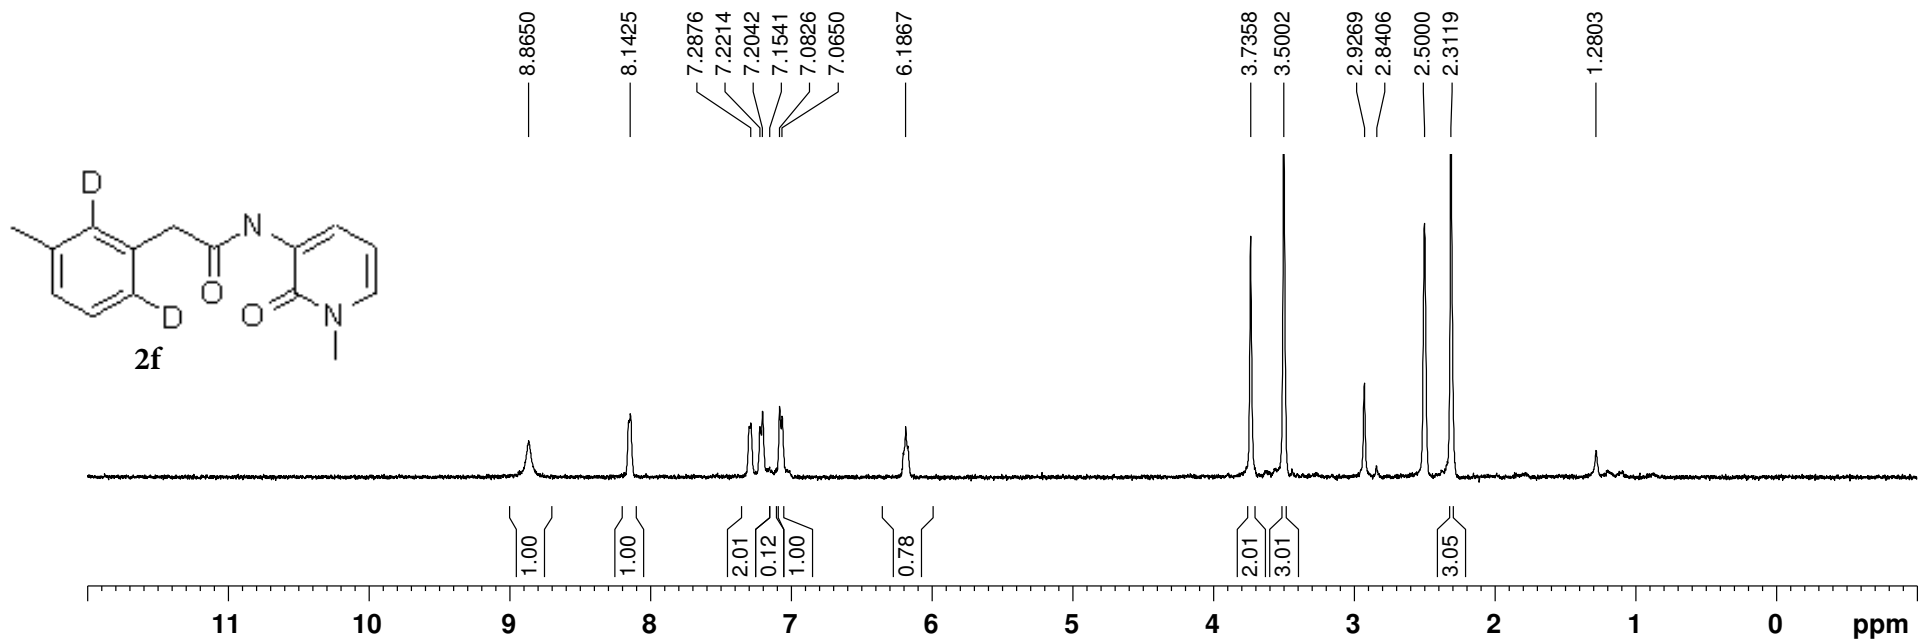

**<sup>1</sup>H NMR of 2f IN DMSO AT 100°C**

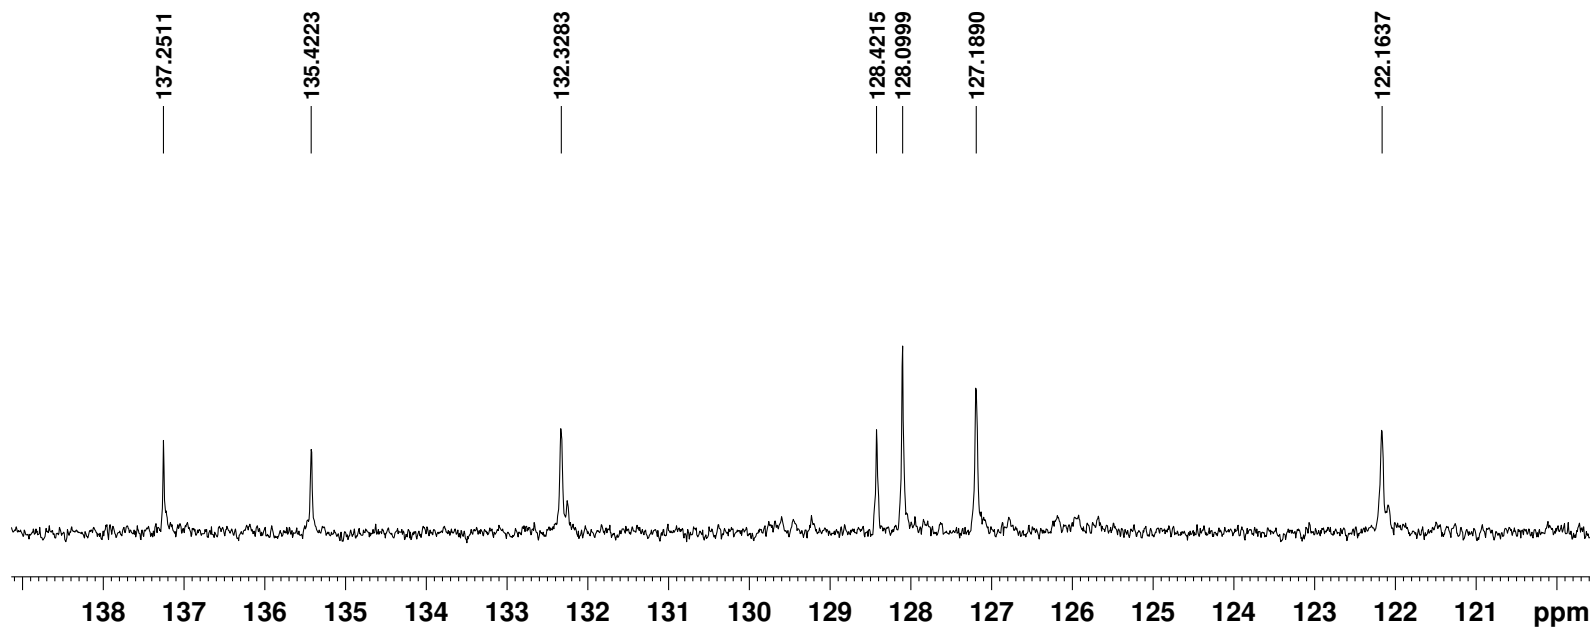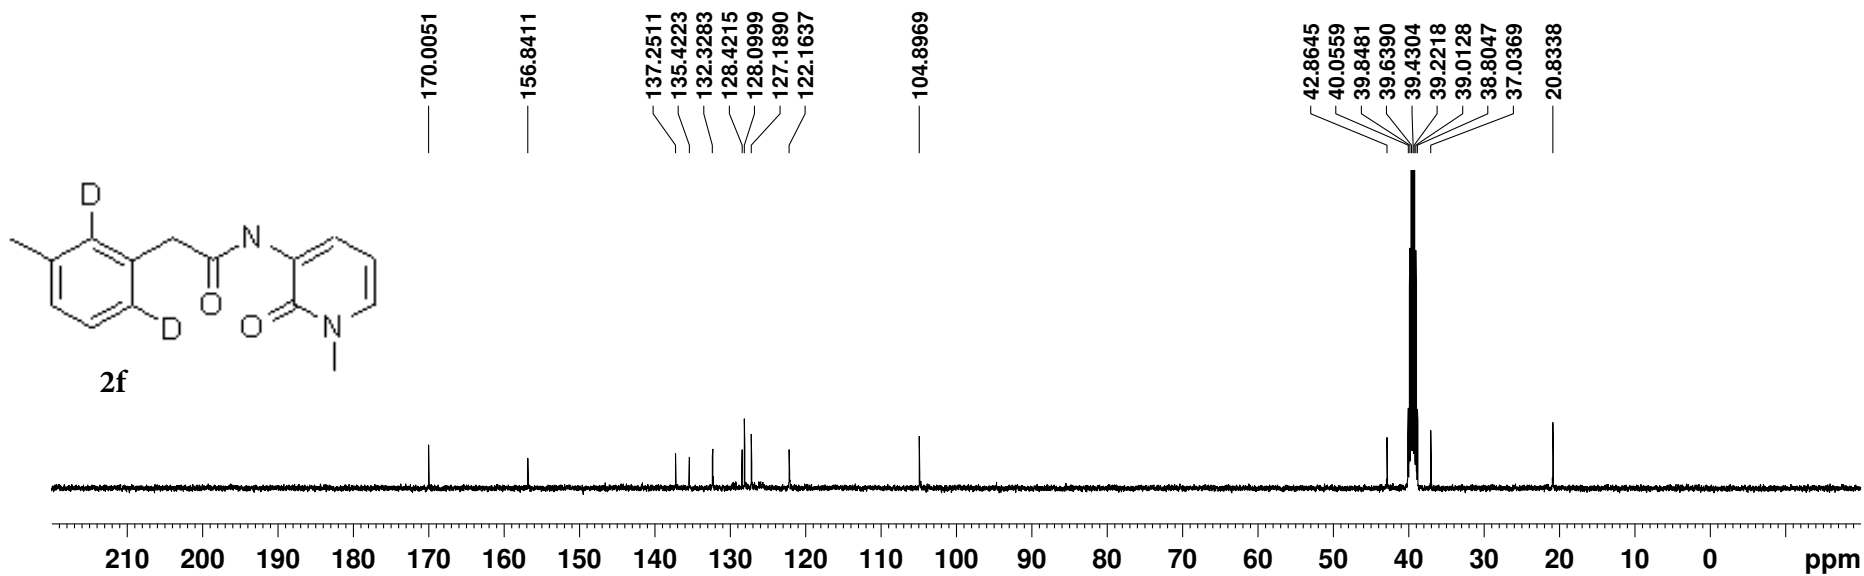

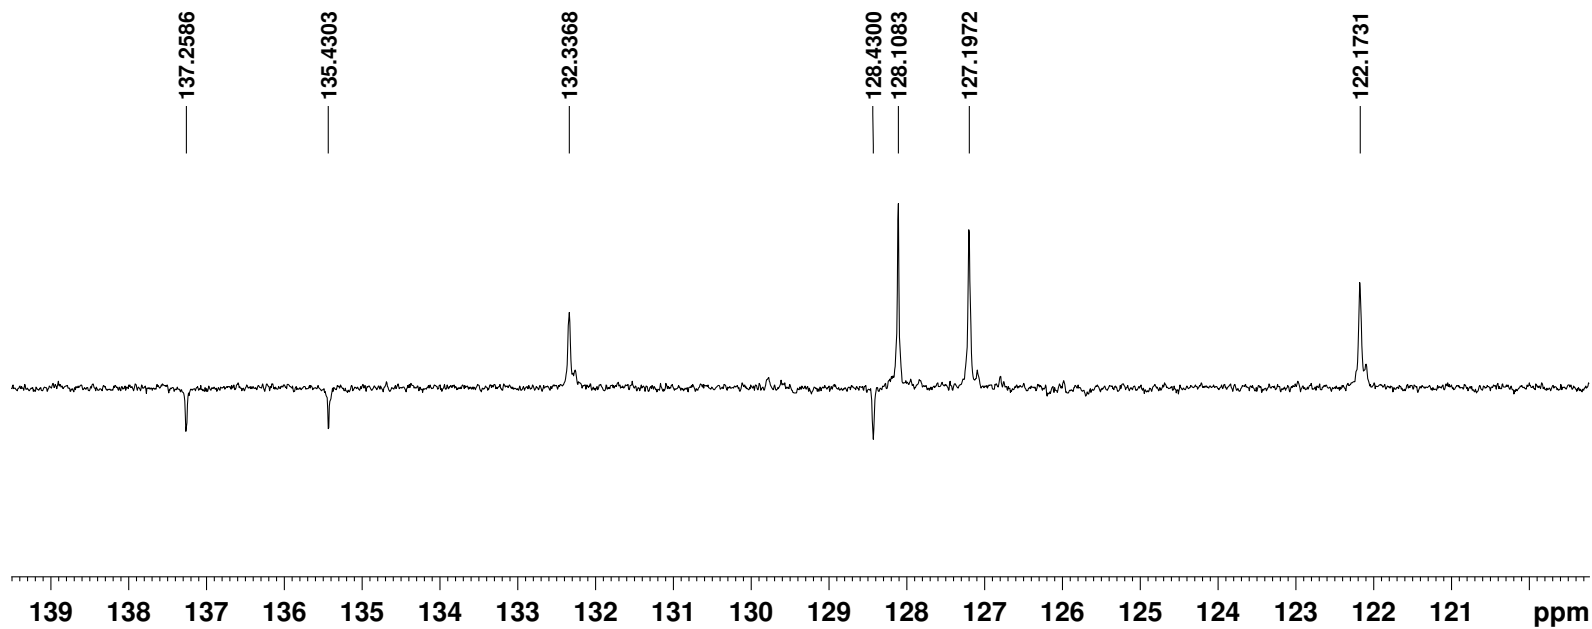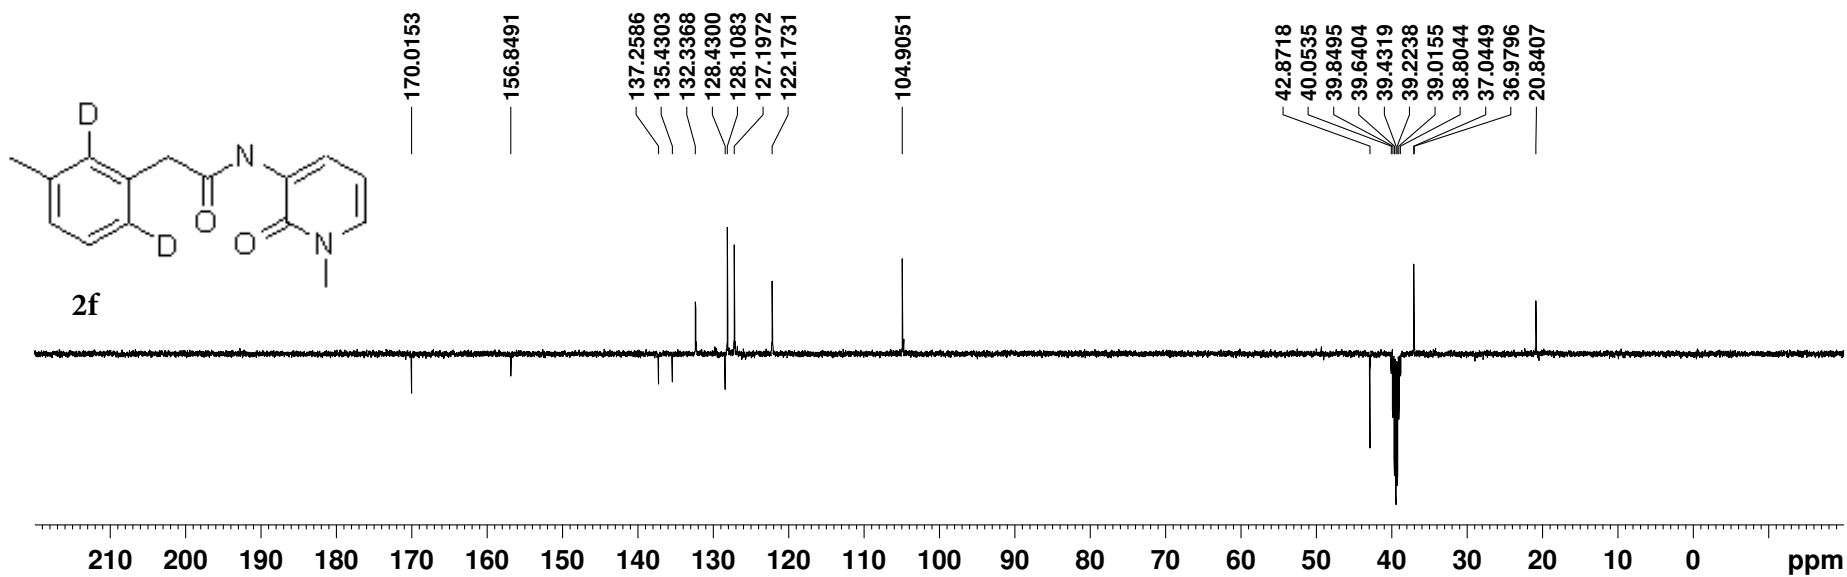

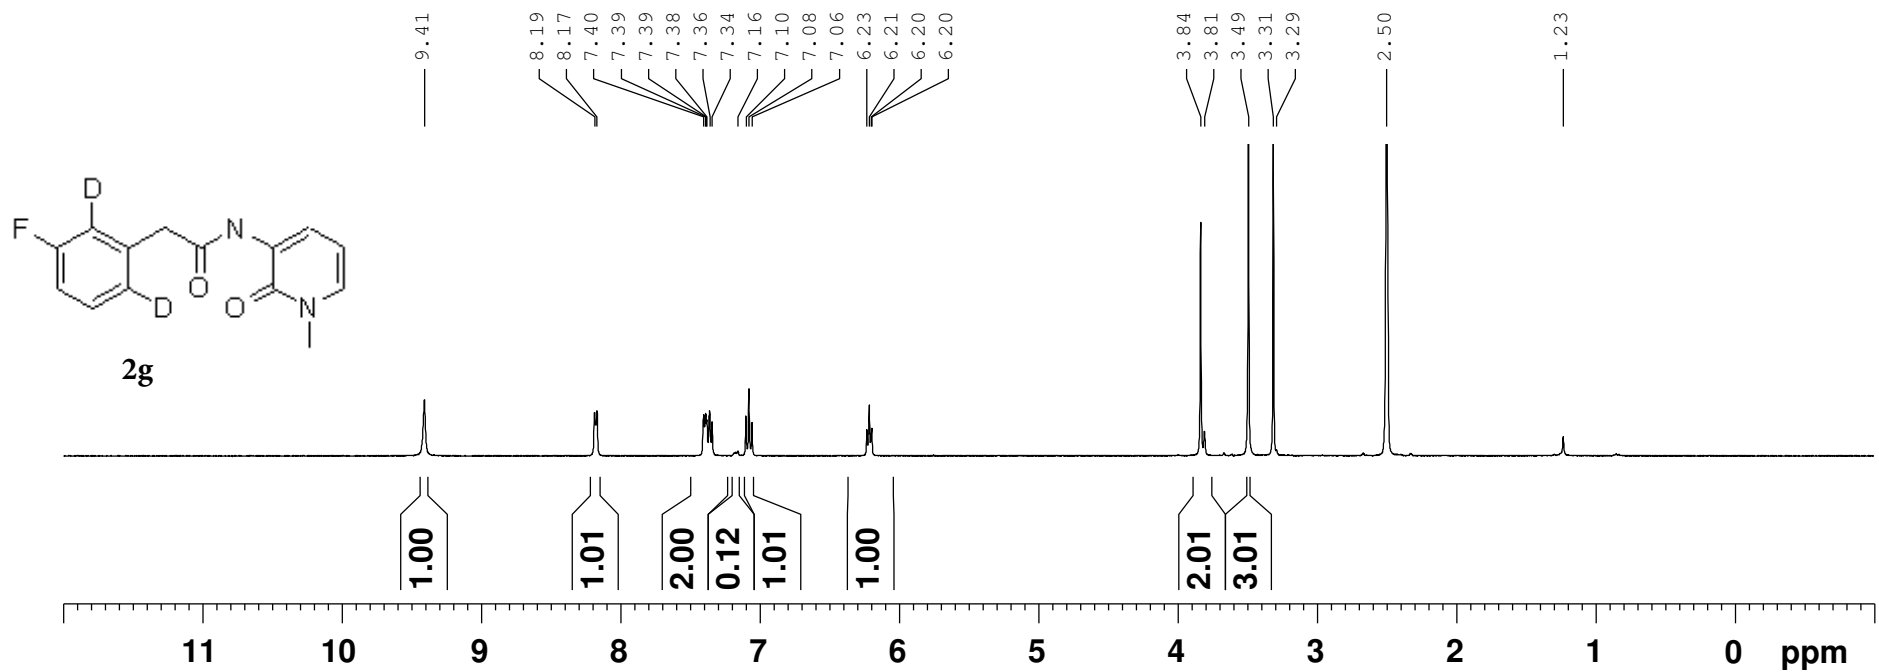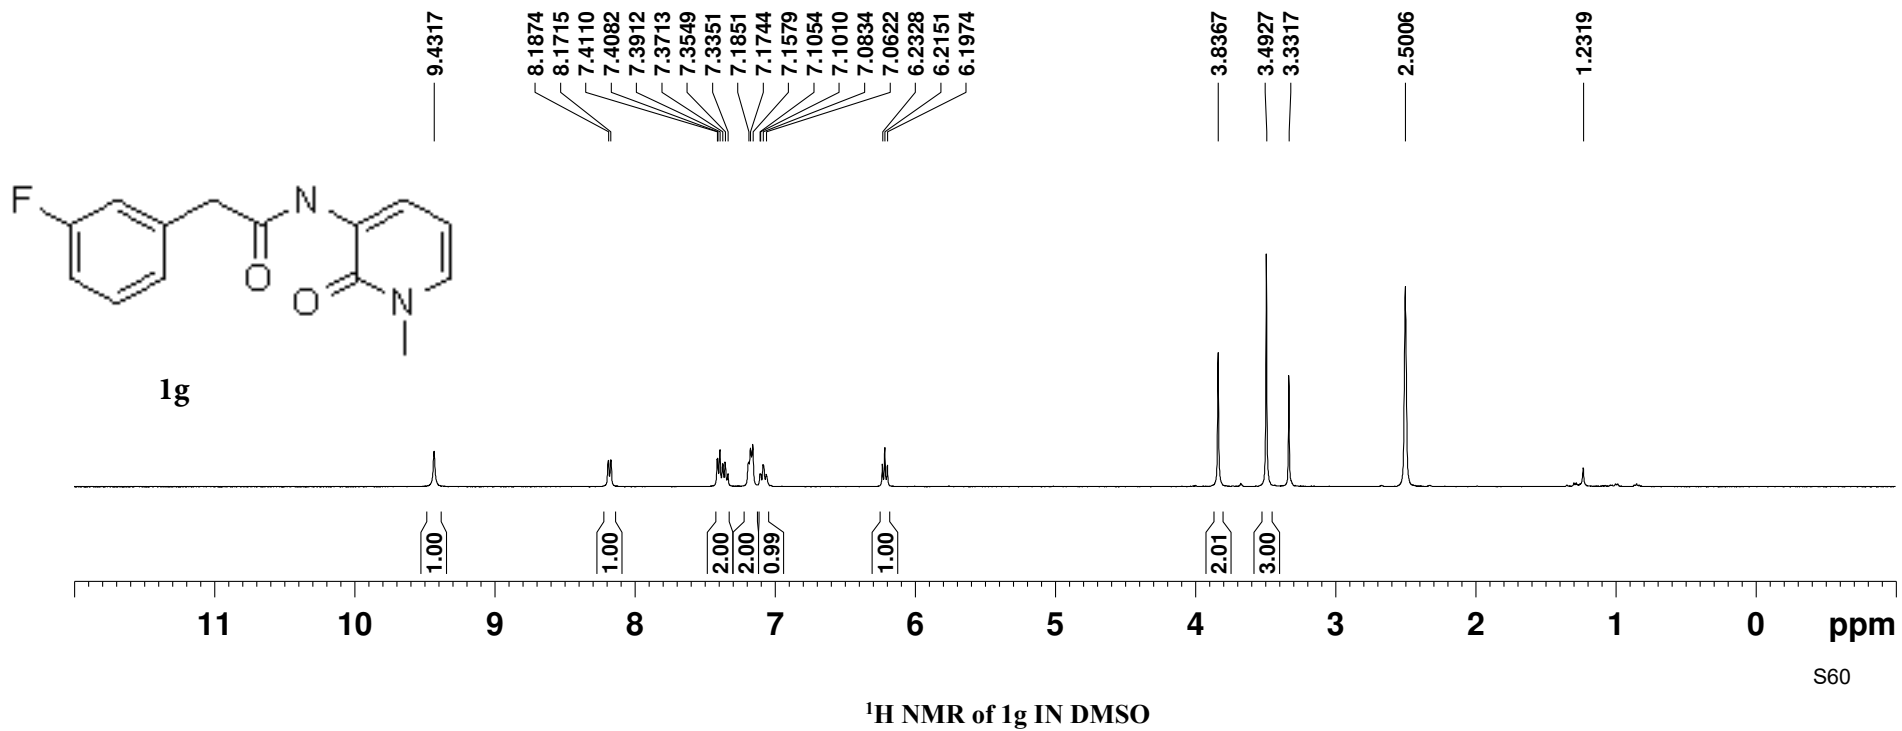

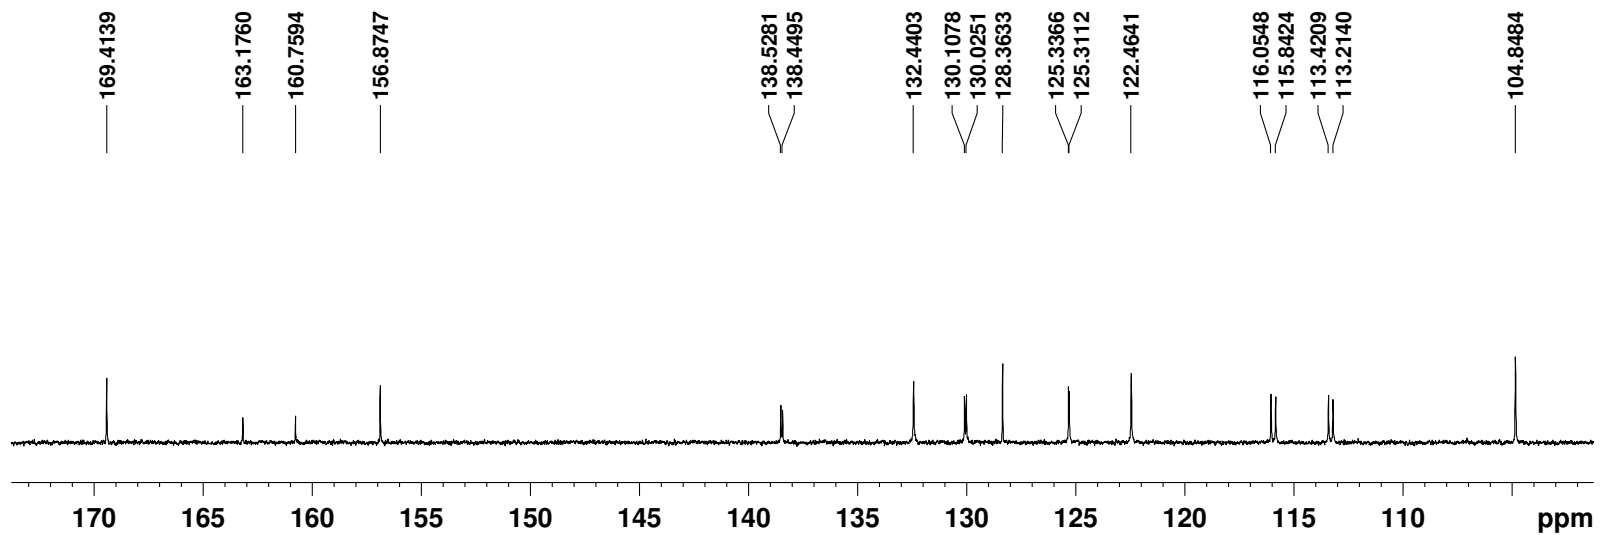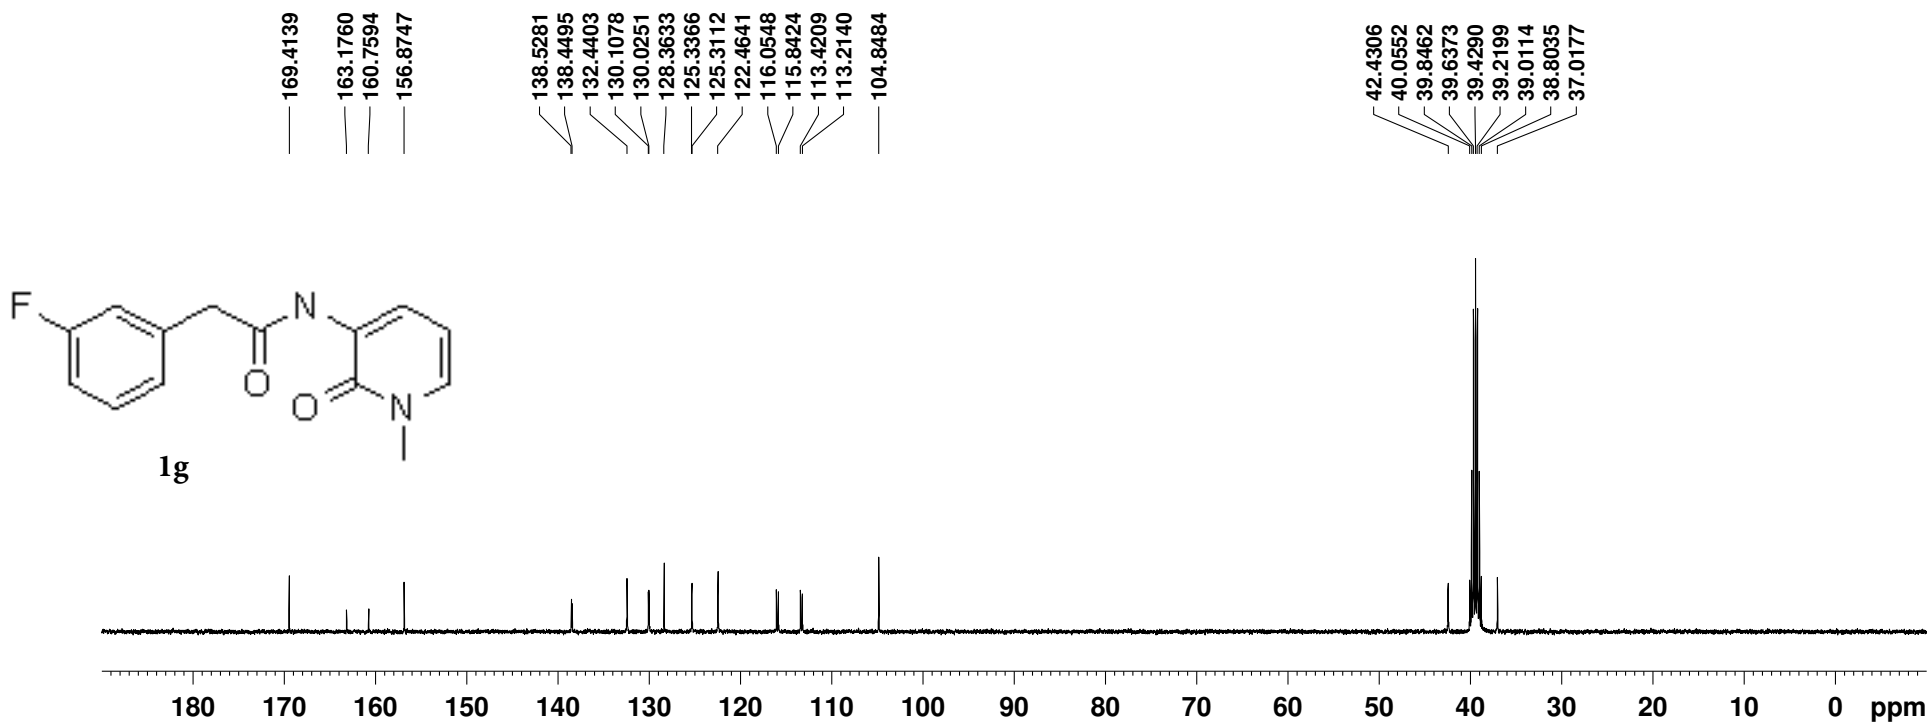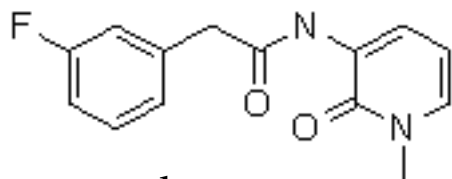

1g

<sup>13</sup>C NMR of 1g IN DMSO

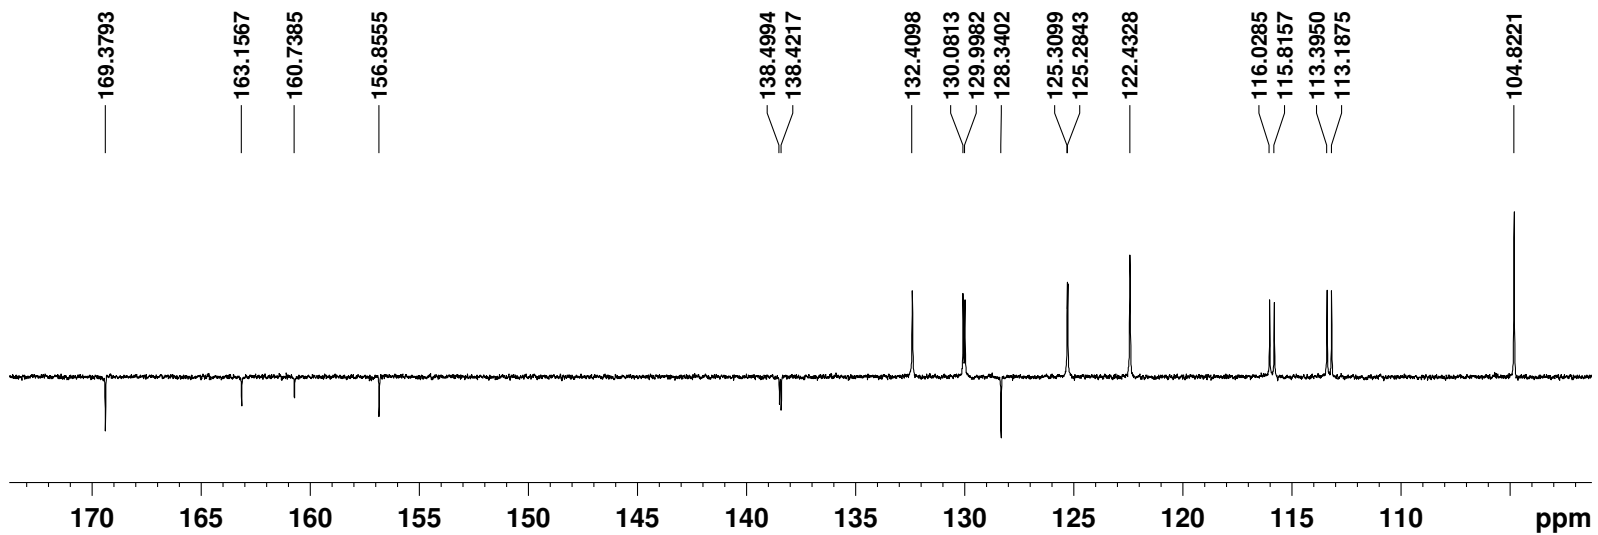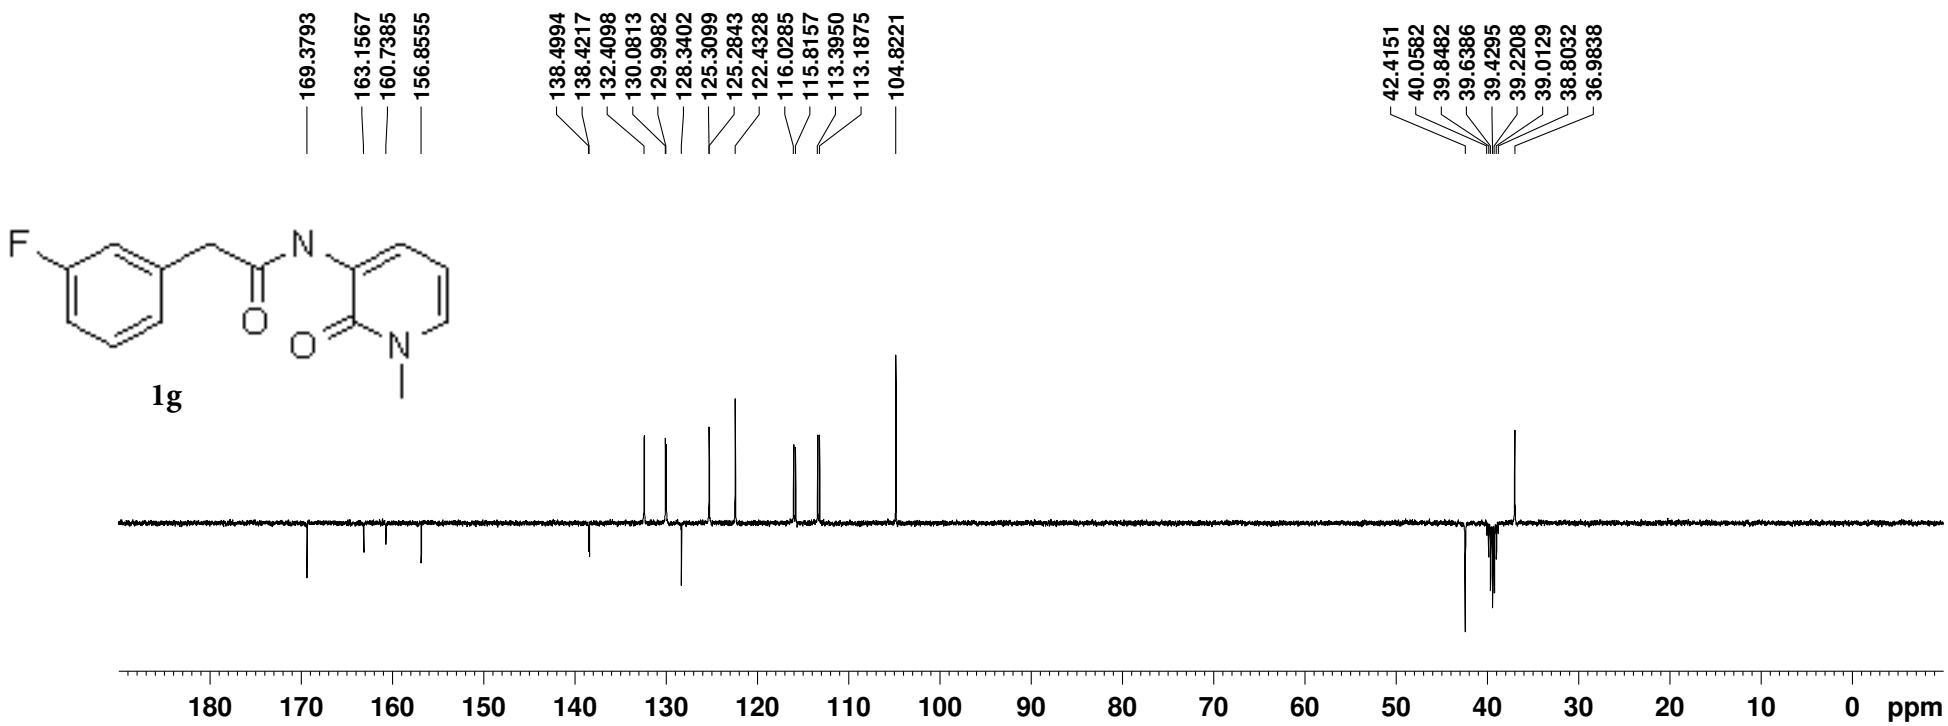

APT of 1g IN DMSO

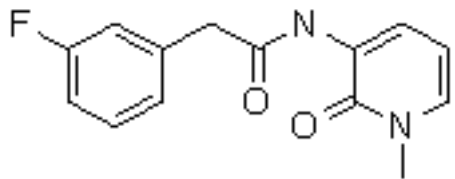

1g

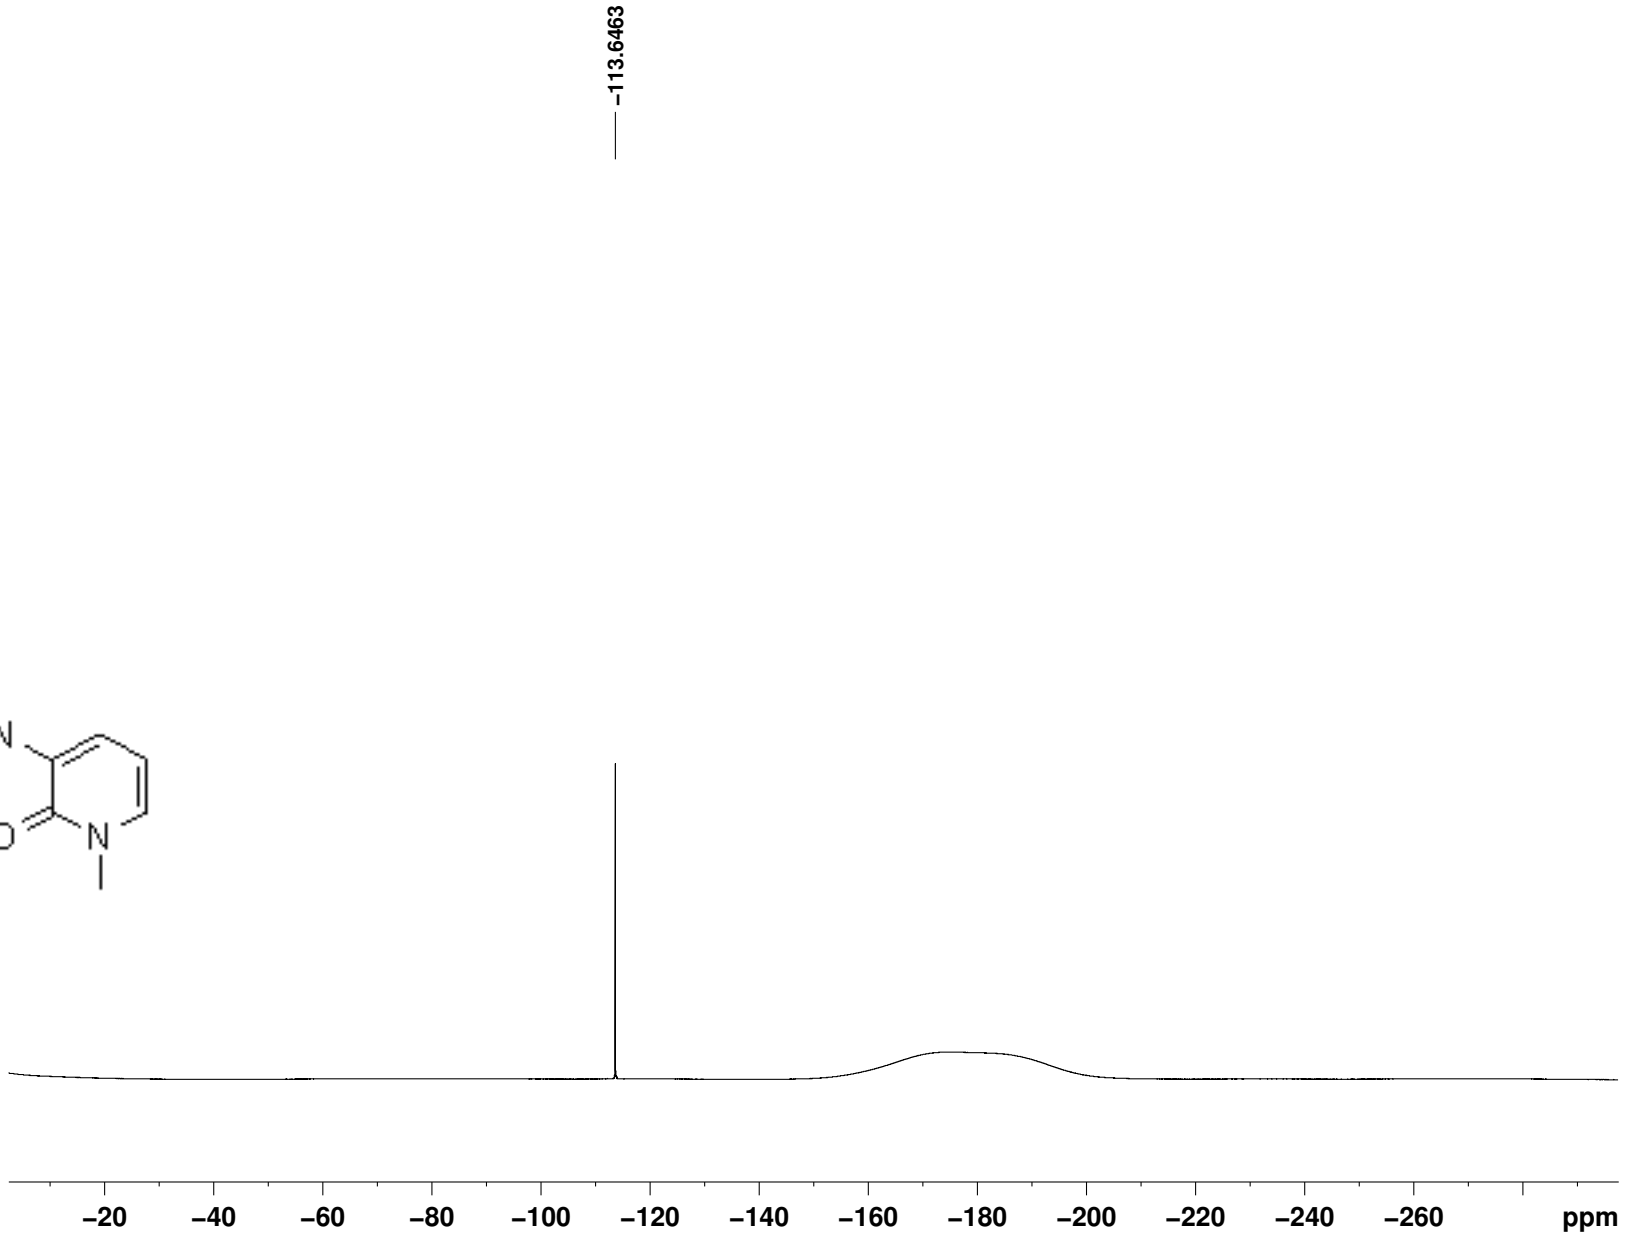

$^{19}\text{F}$  NMR of 1g IN DMSO

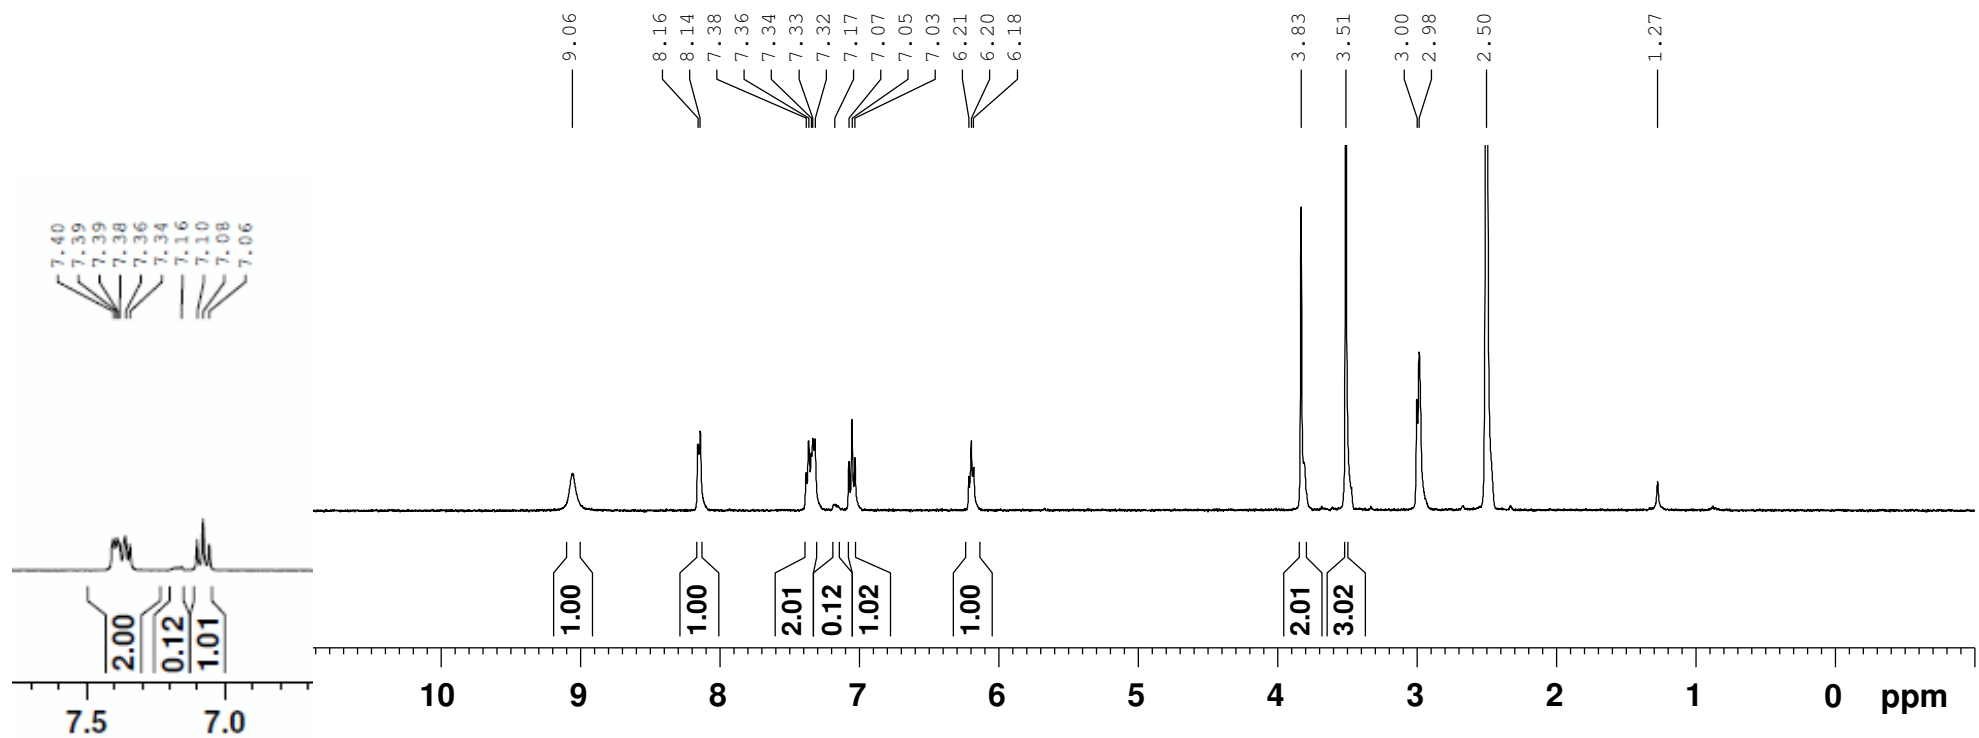

**<sup>1</sup>H NMR of 2g IN DMSO AT 100°C**

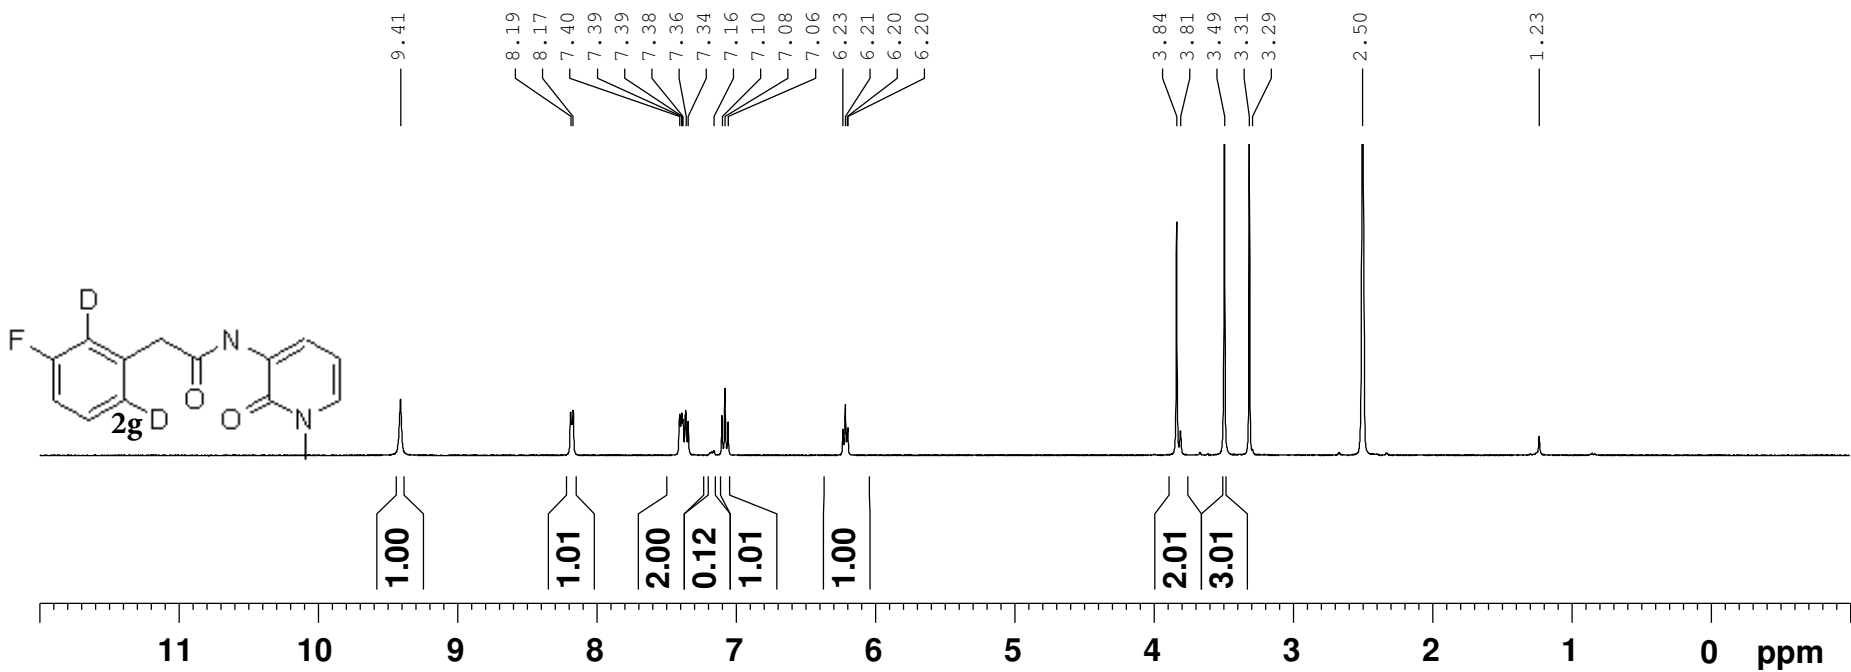

**<sup>1</sup>H NMR of 2g IN DMSO AT 20°C**



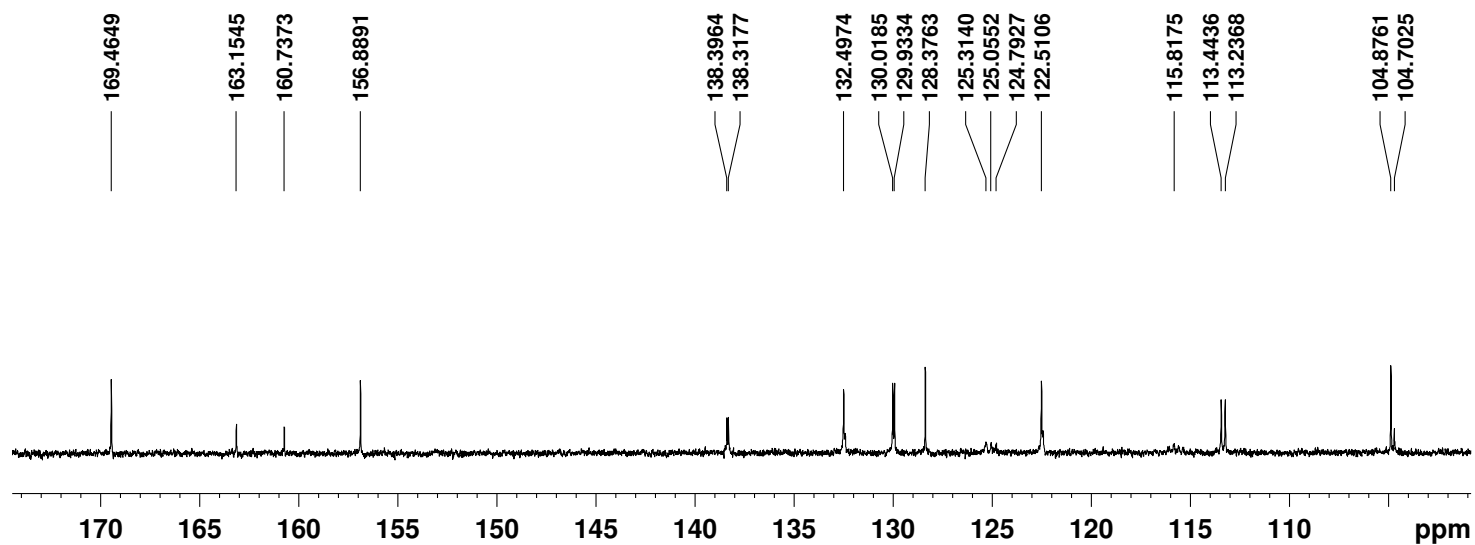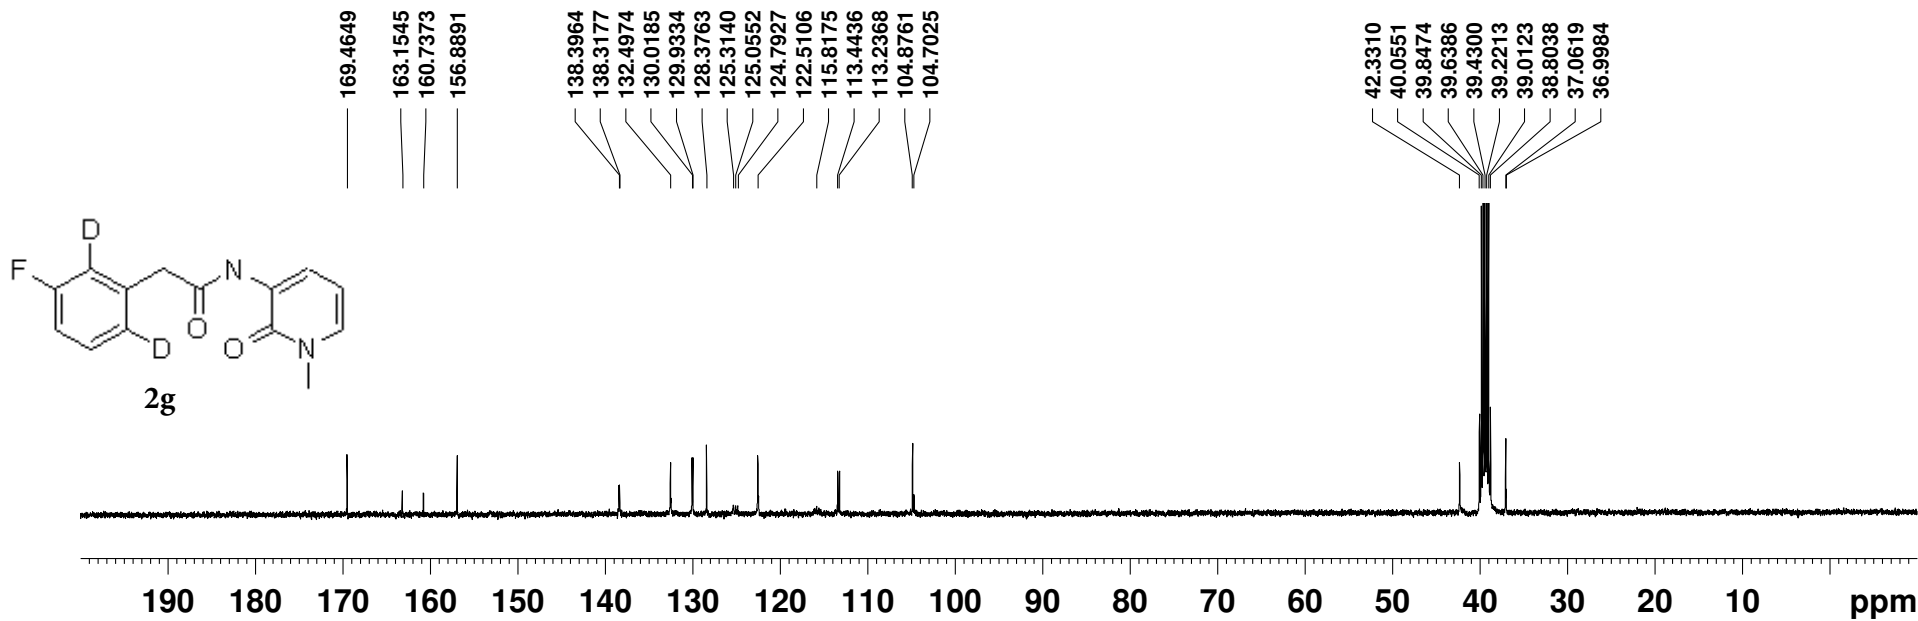

<sup>13</sup>C NMR of 2g IN DMSO

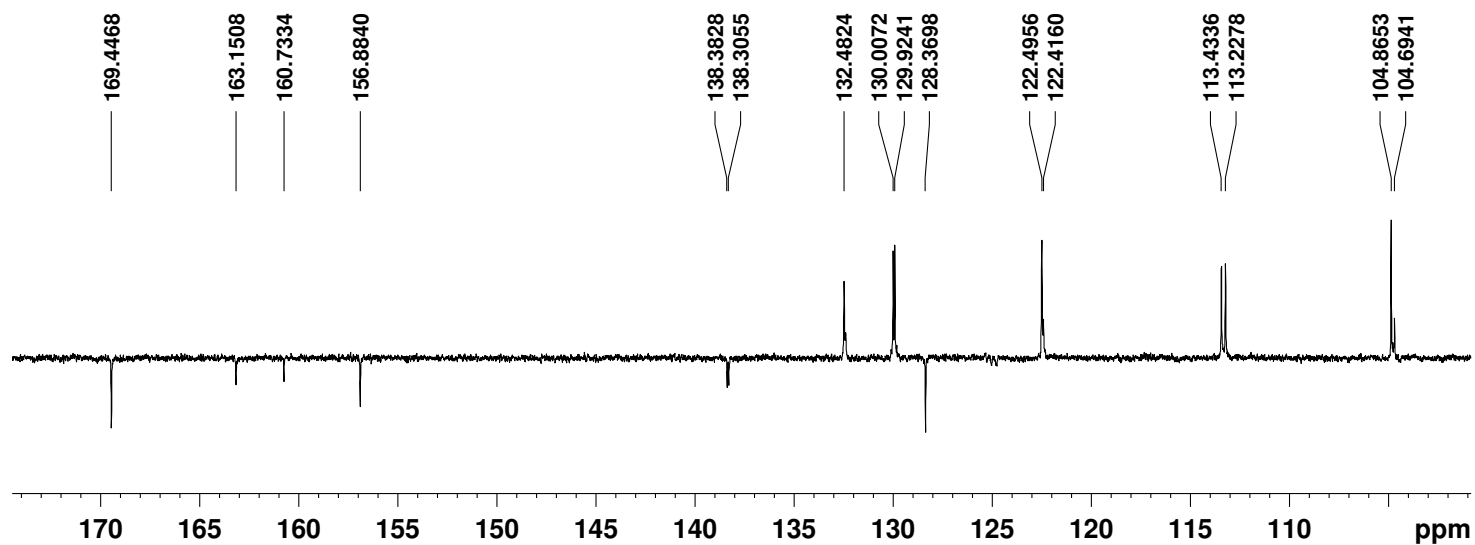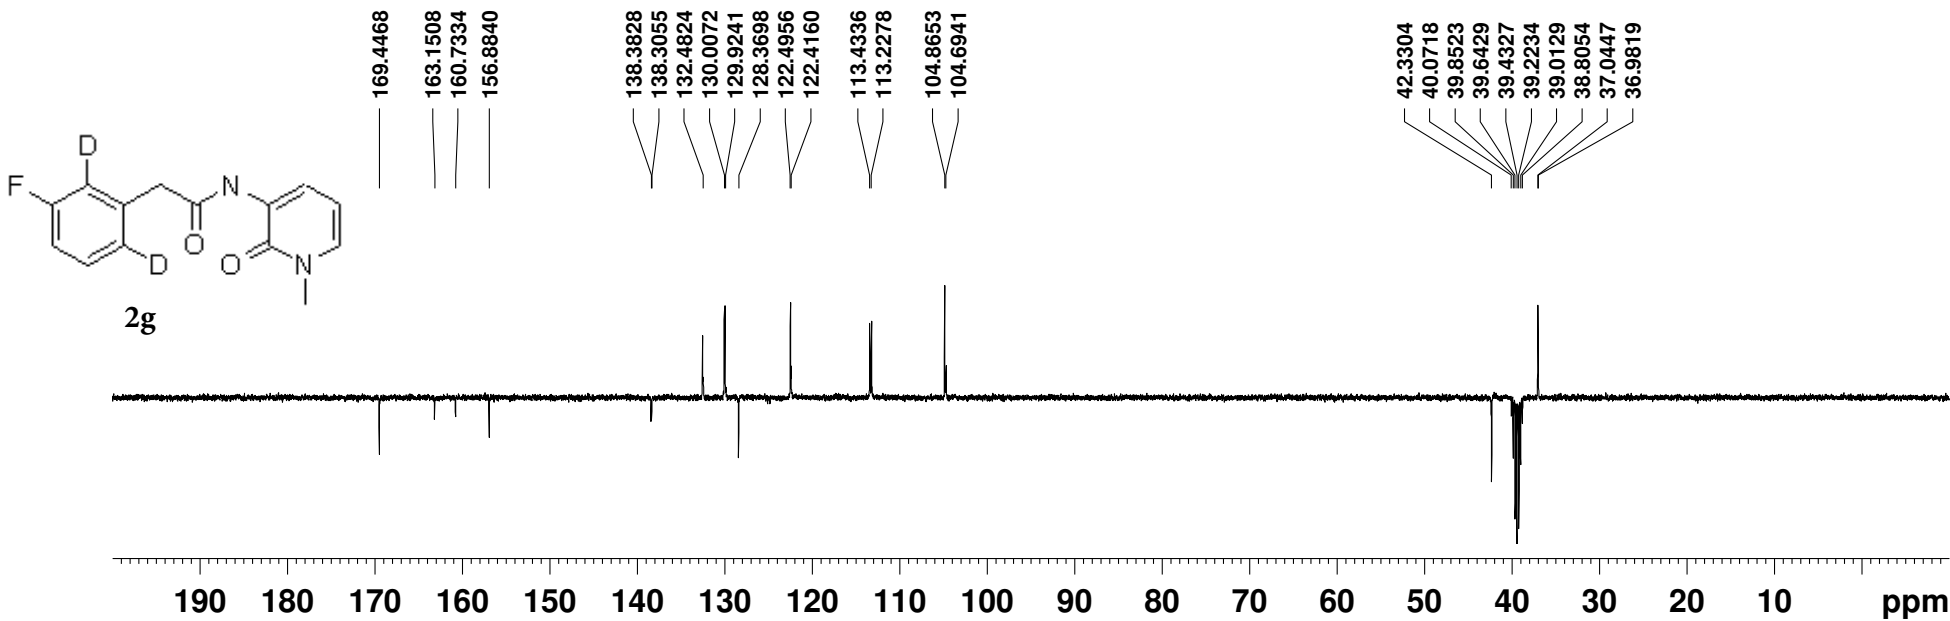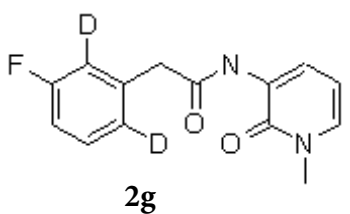

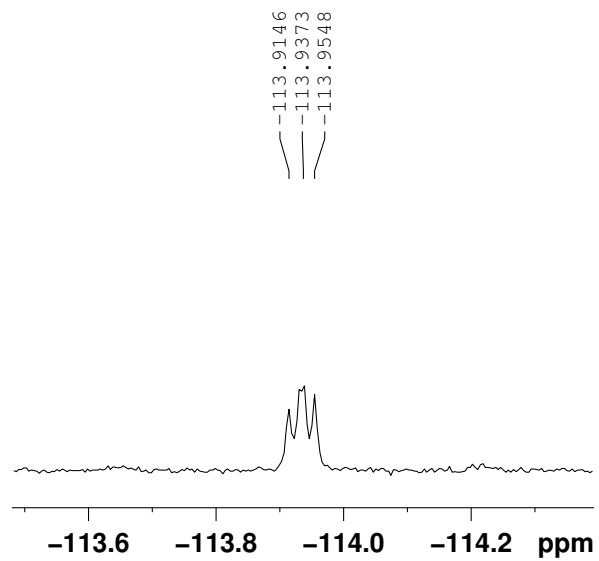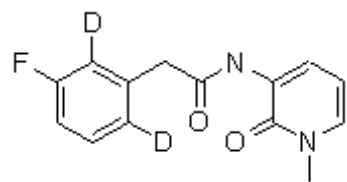

2g

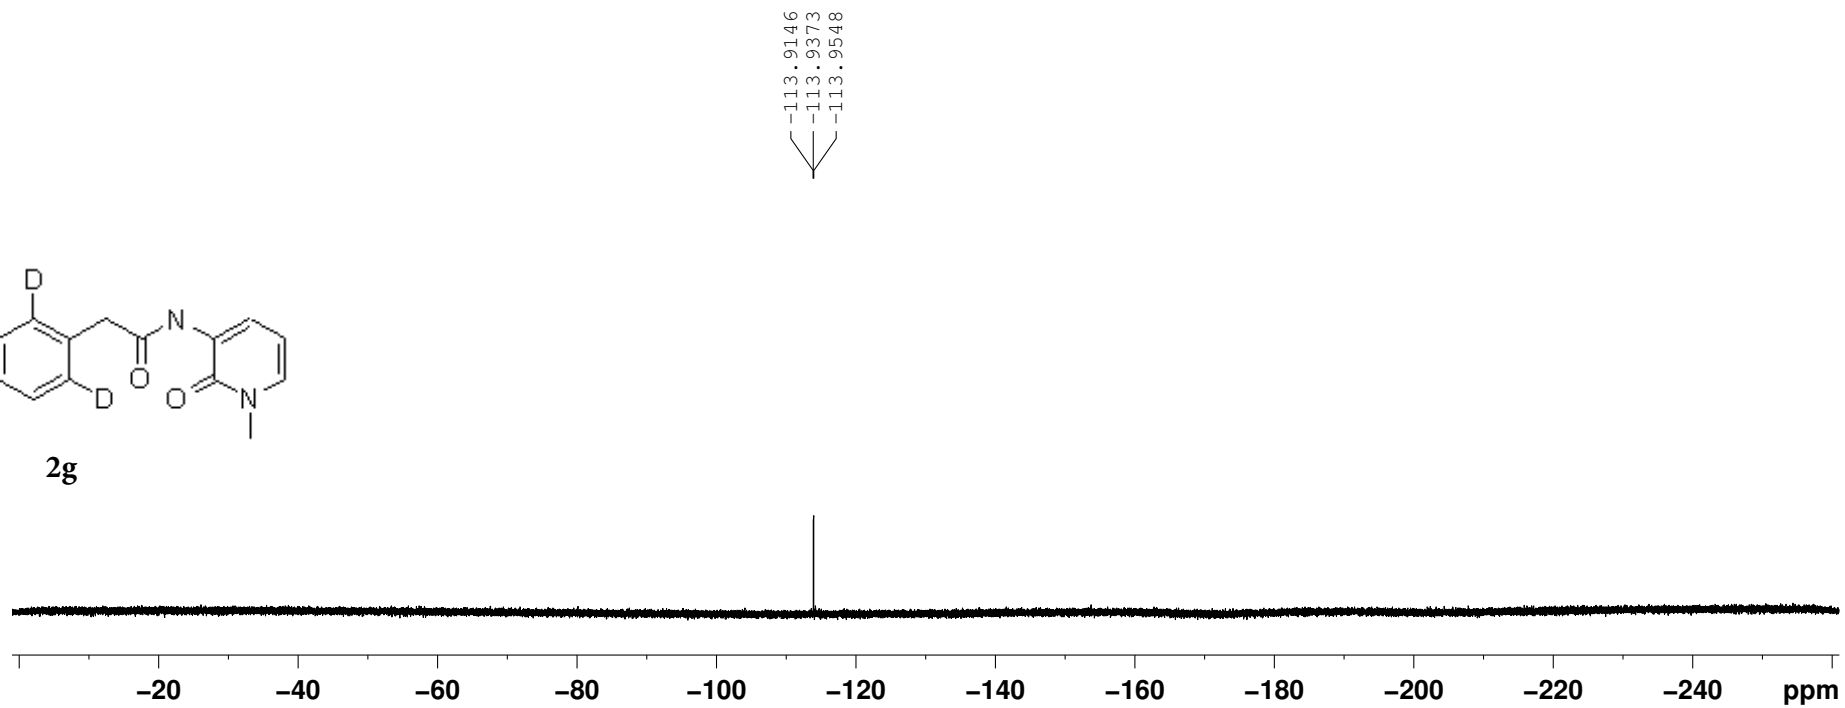

$^{19}\text{F}$  NMR of 2g IN DMSO (PC)

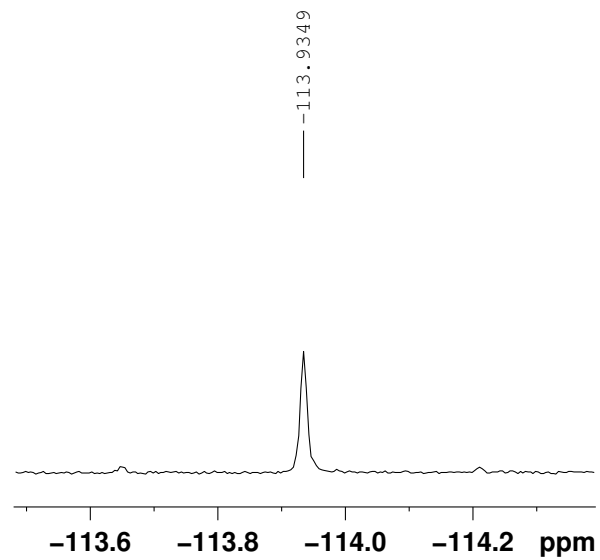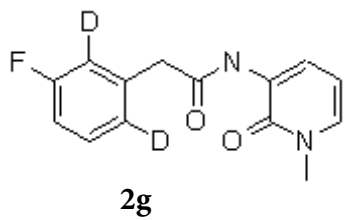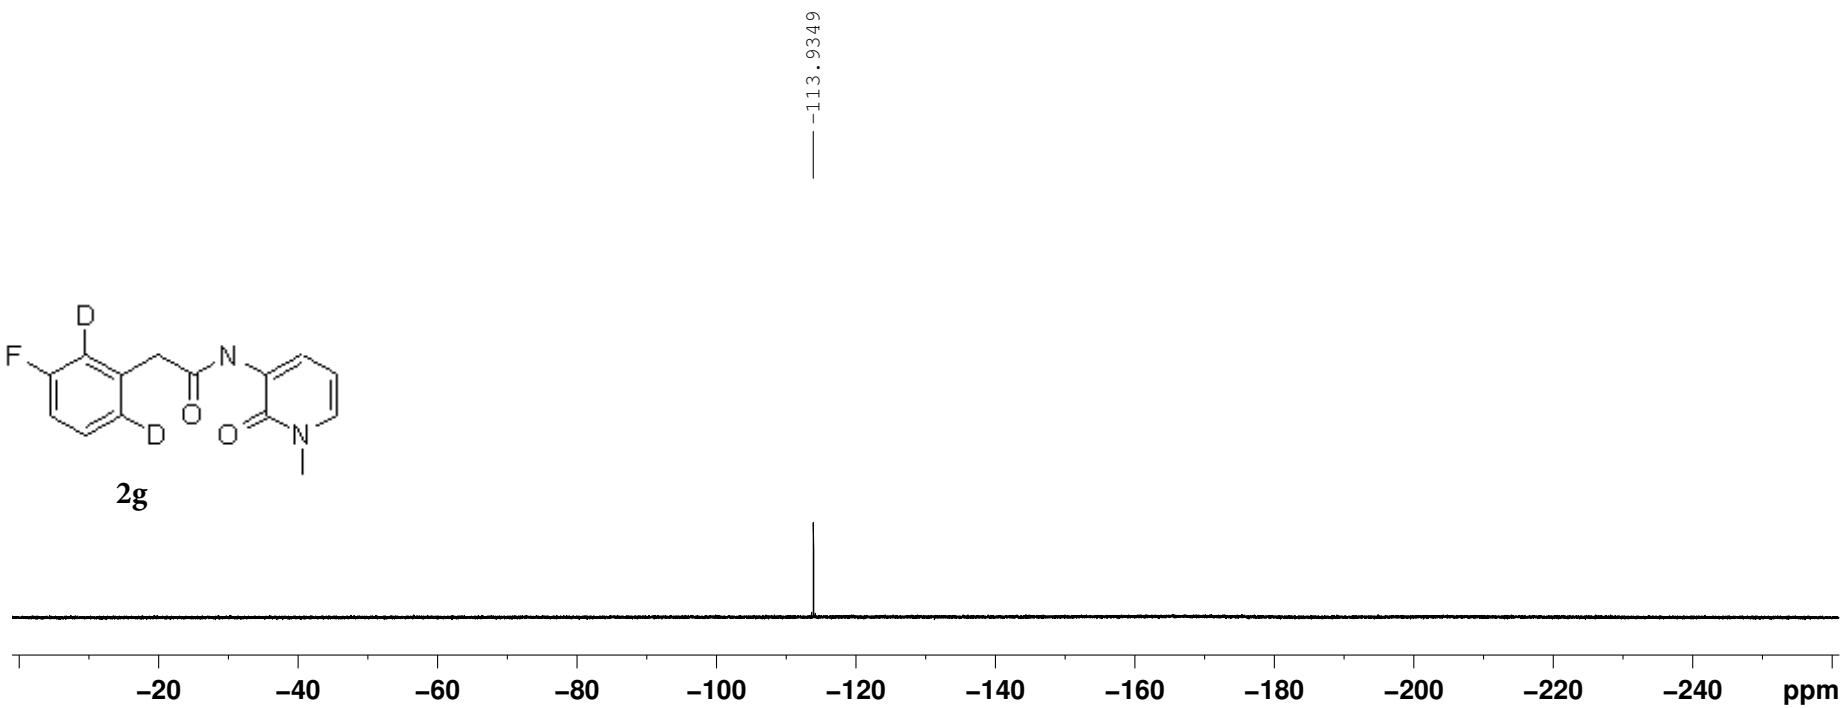

$^{19}\text{F}$  NMR of 2g IN DMSO (PDC)

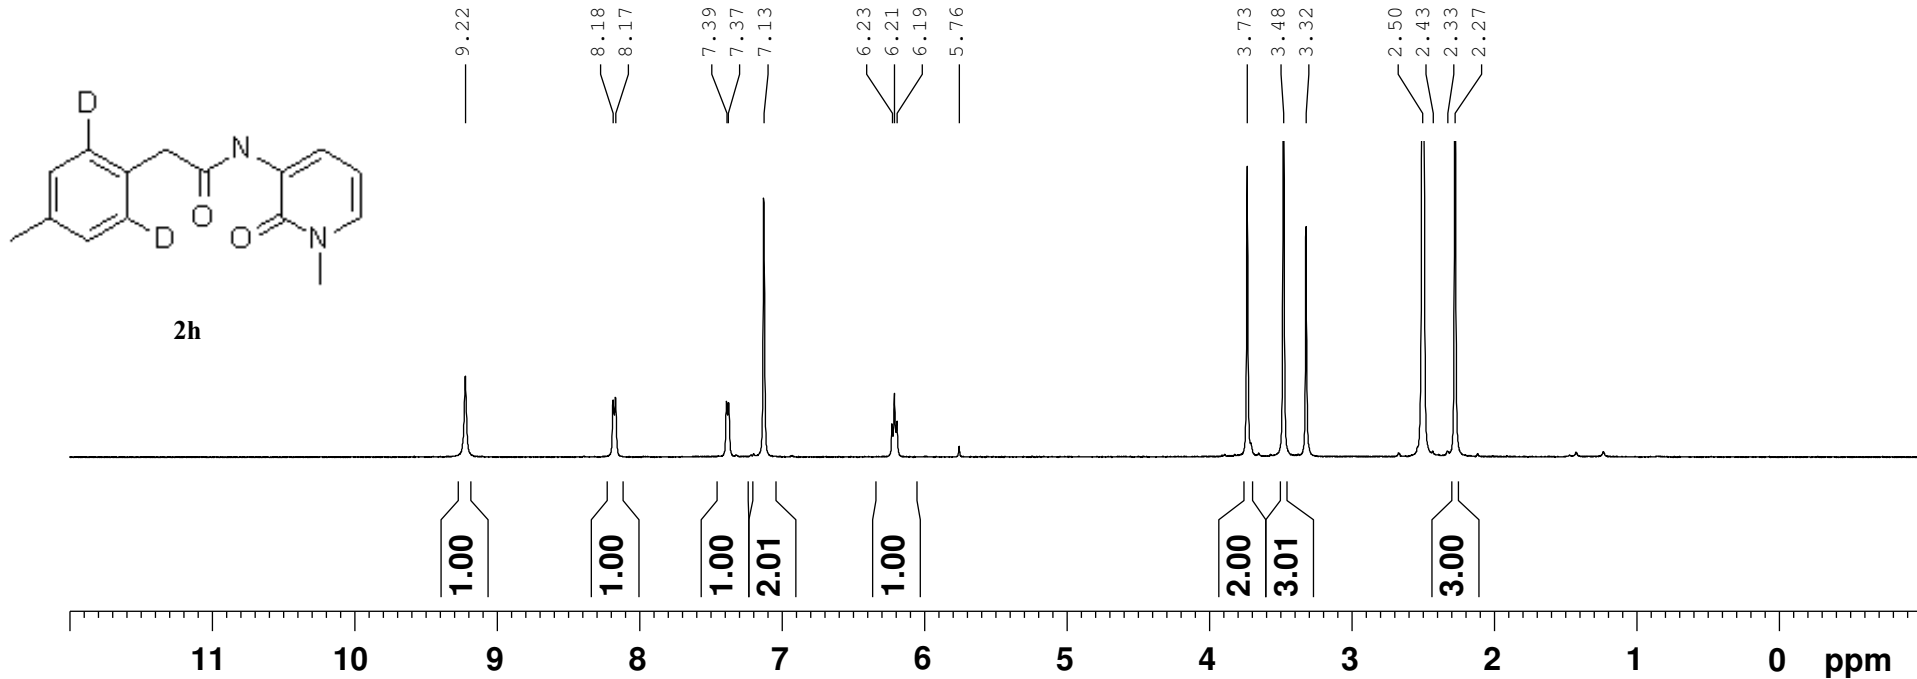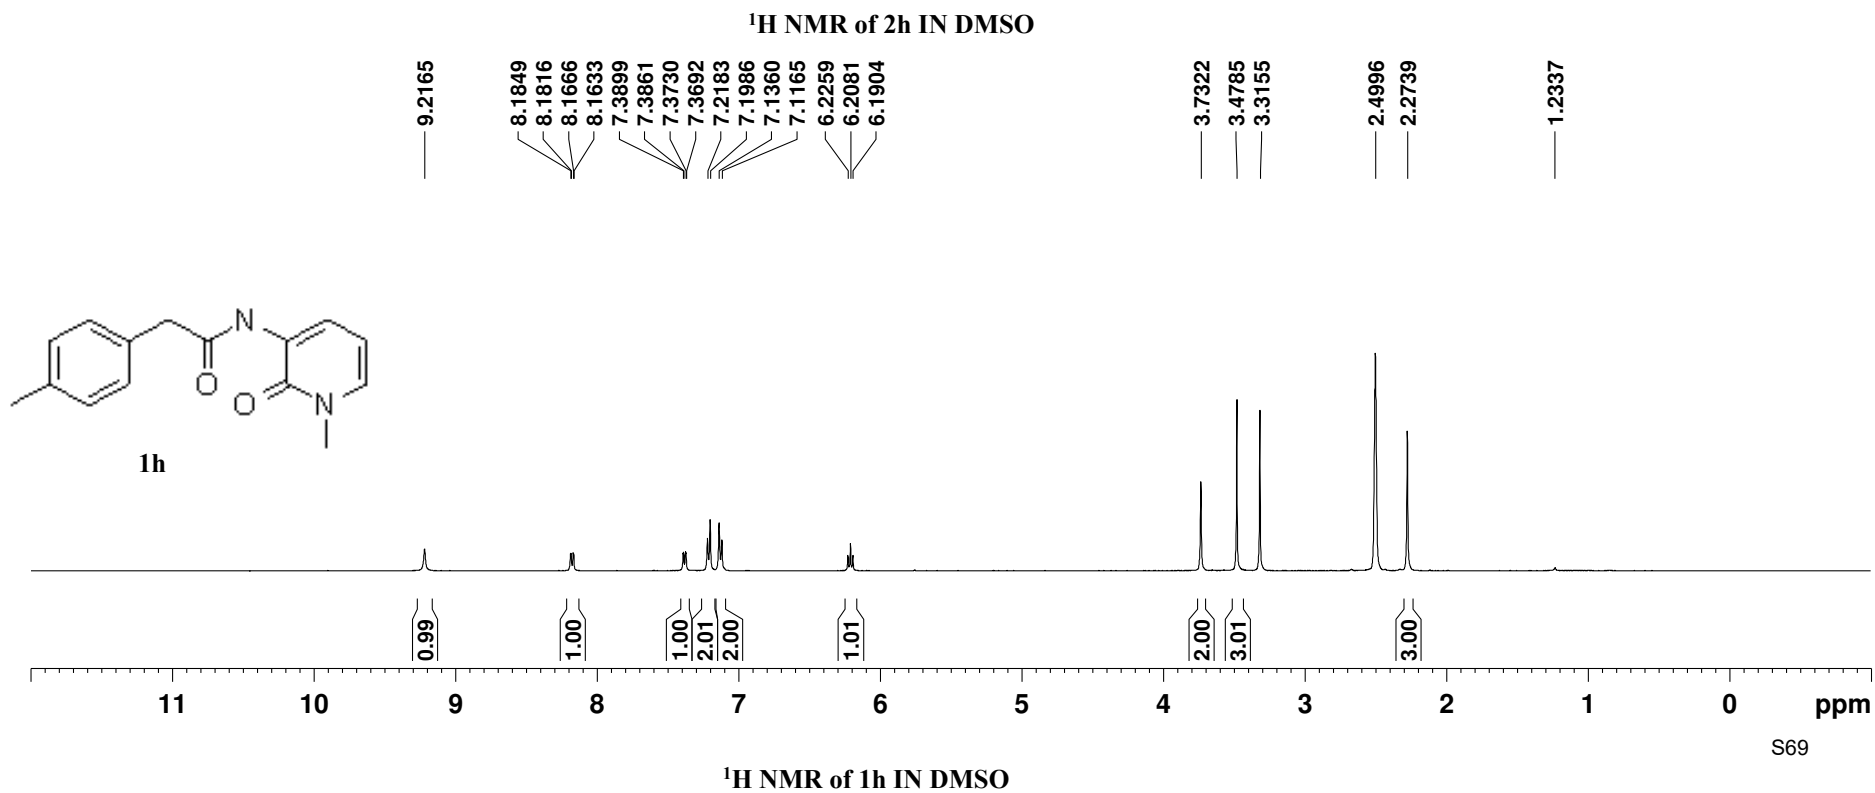

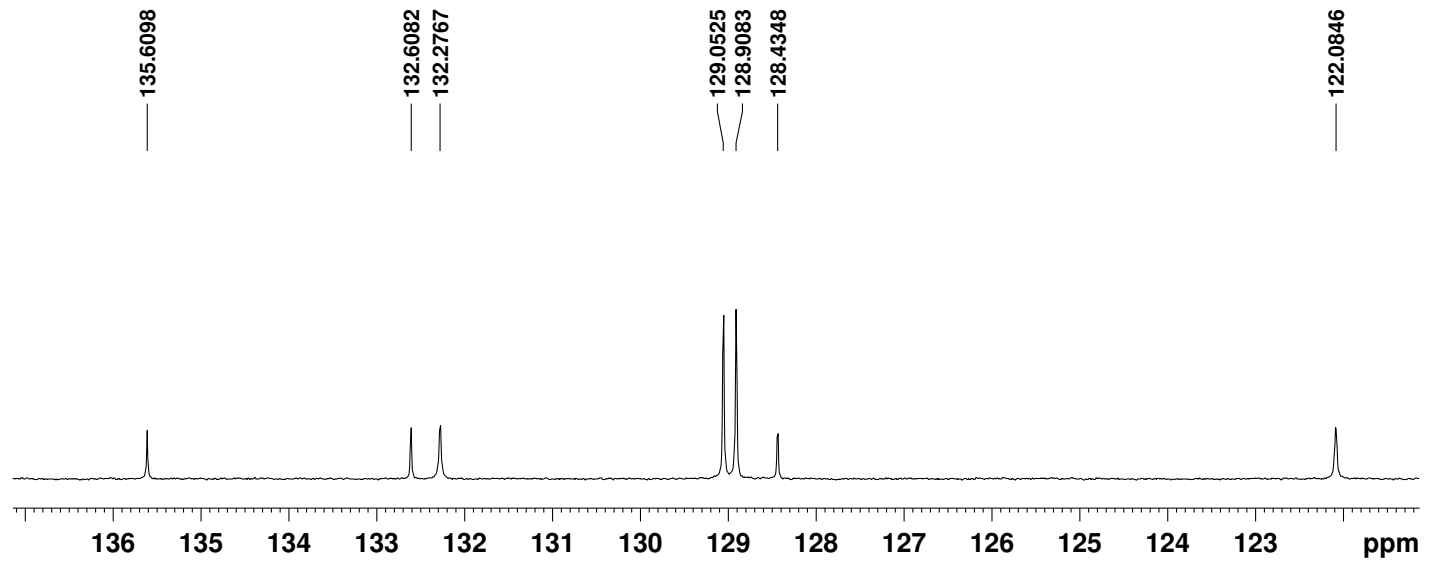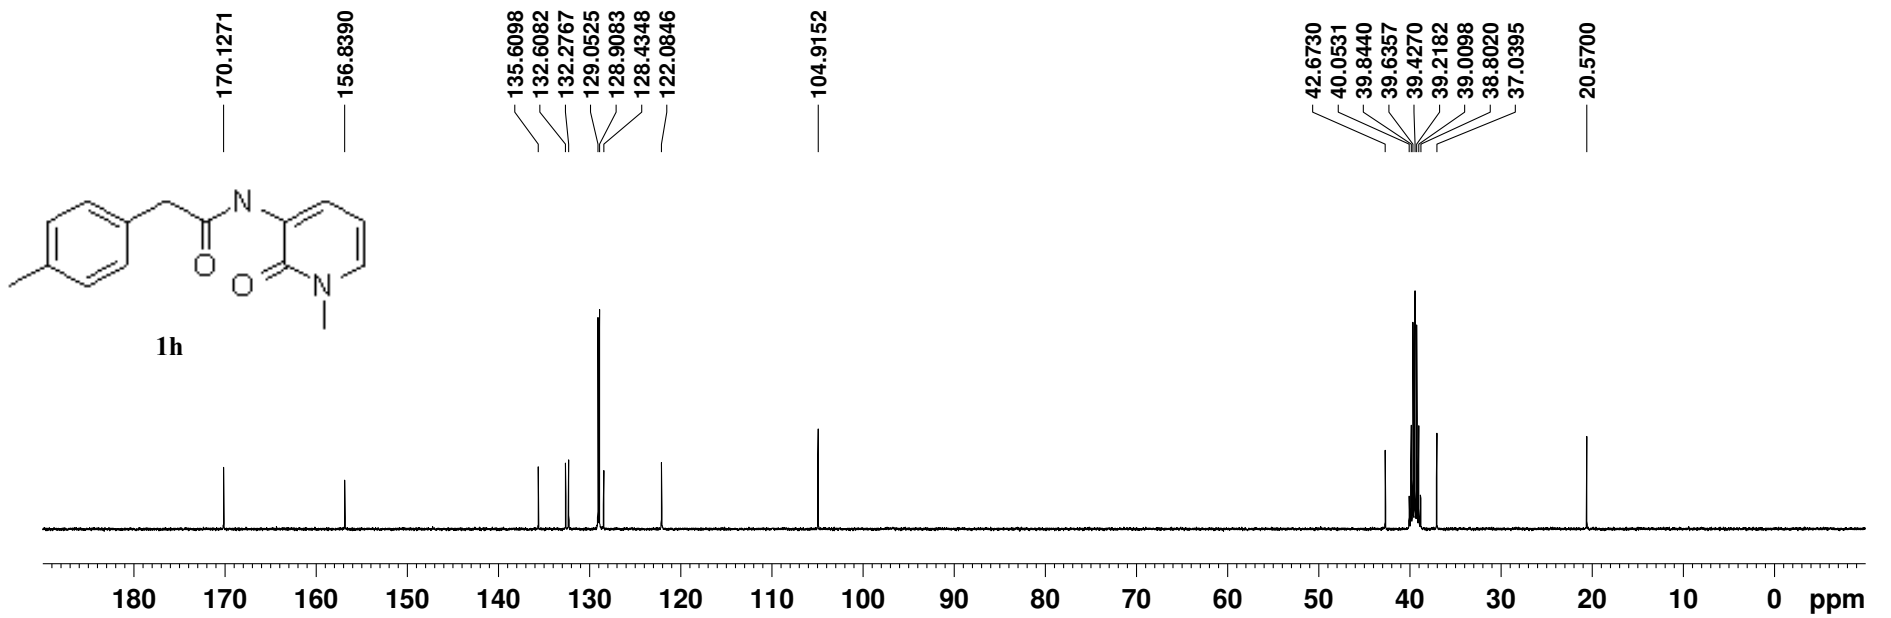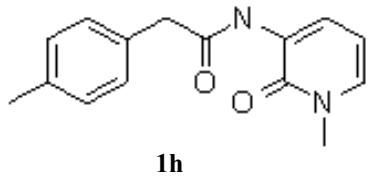

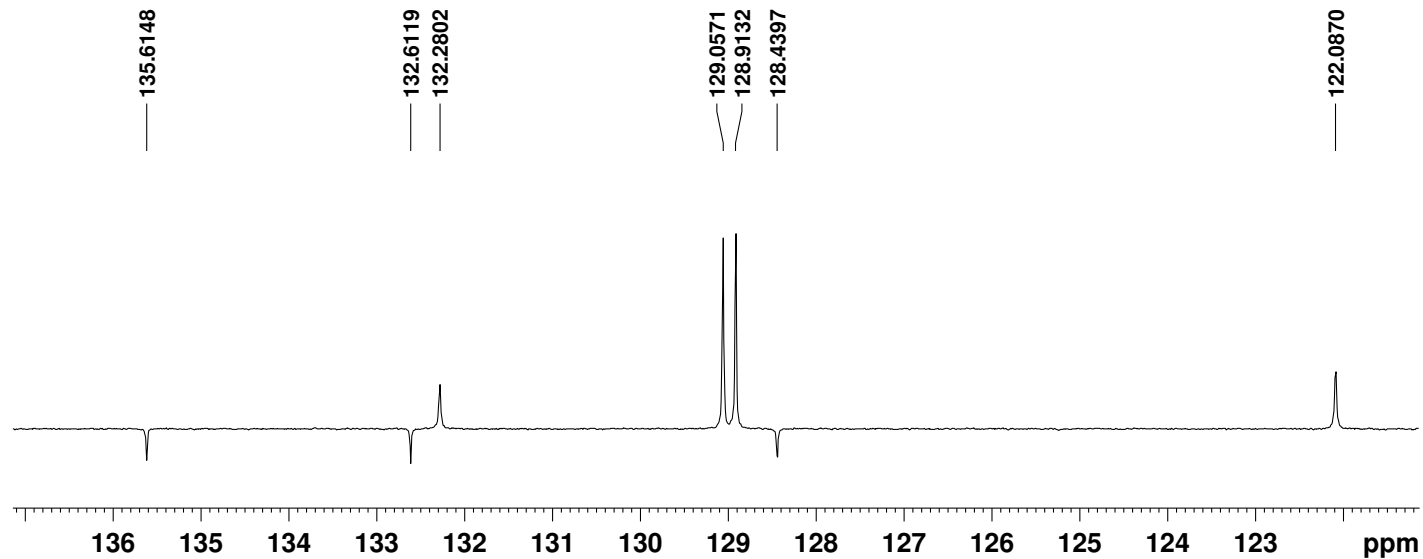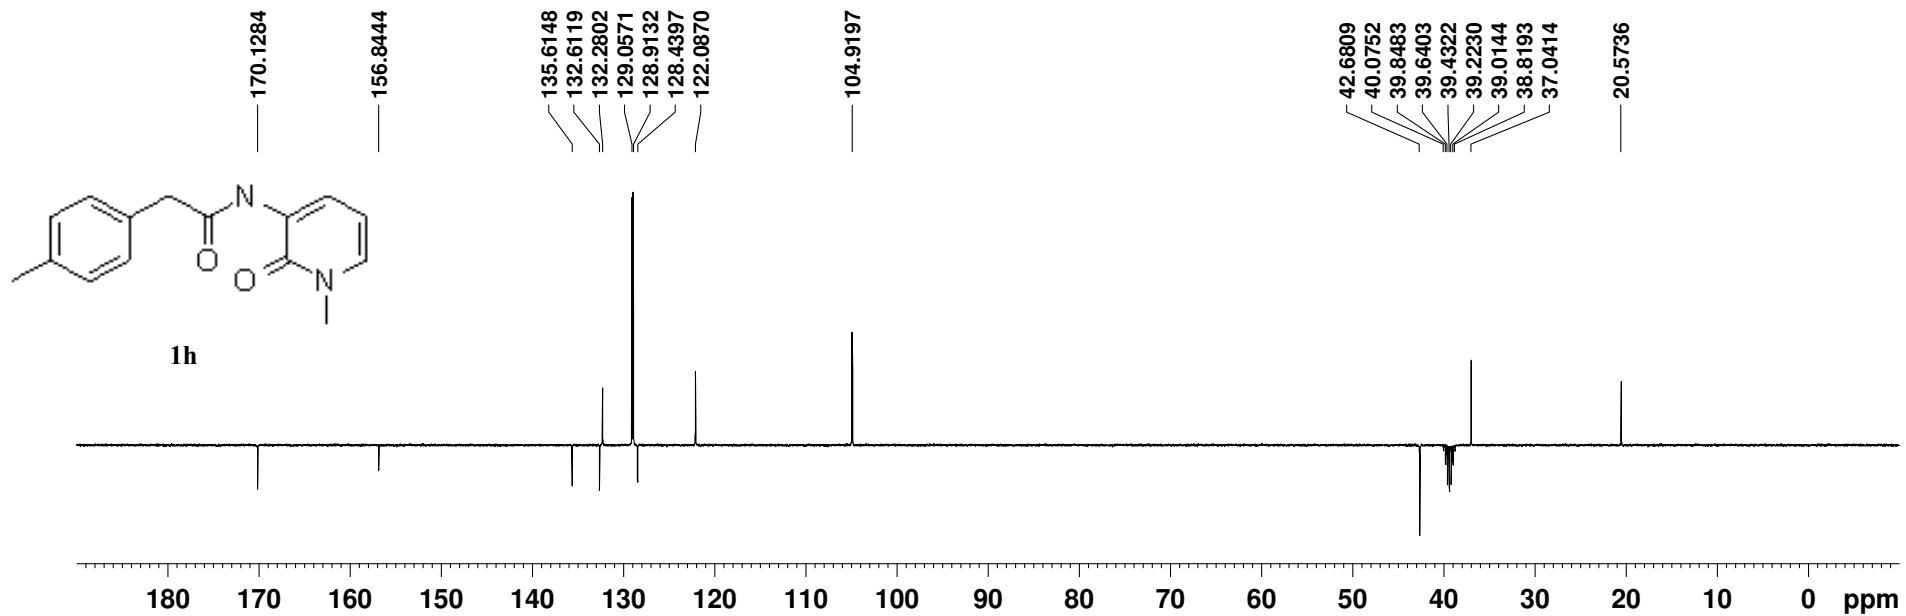

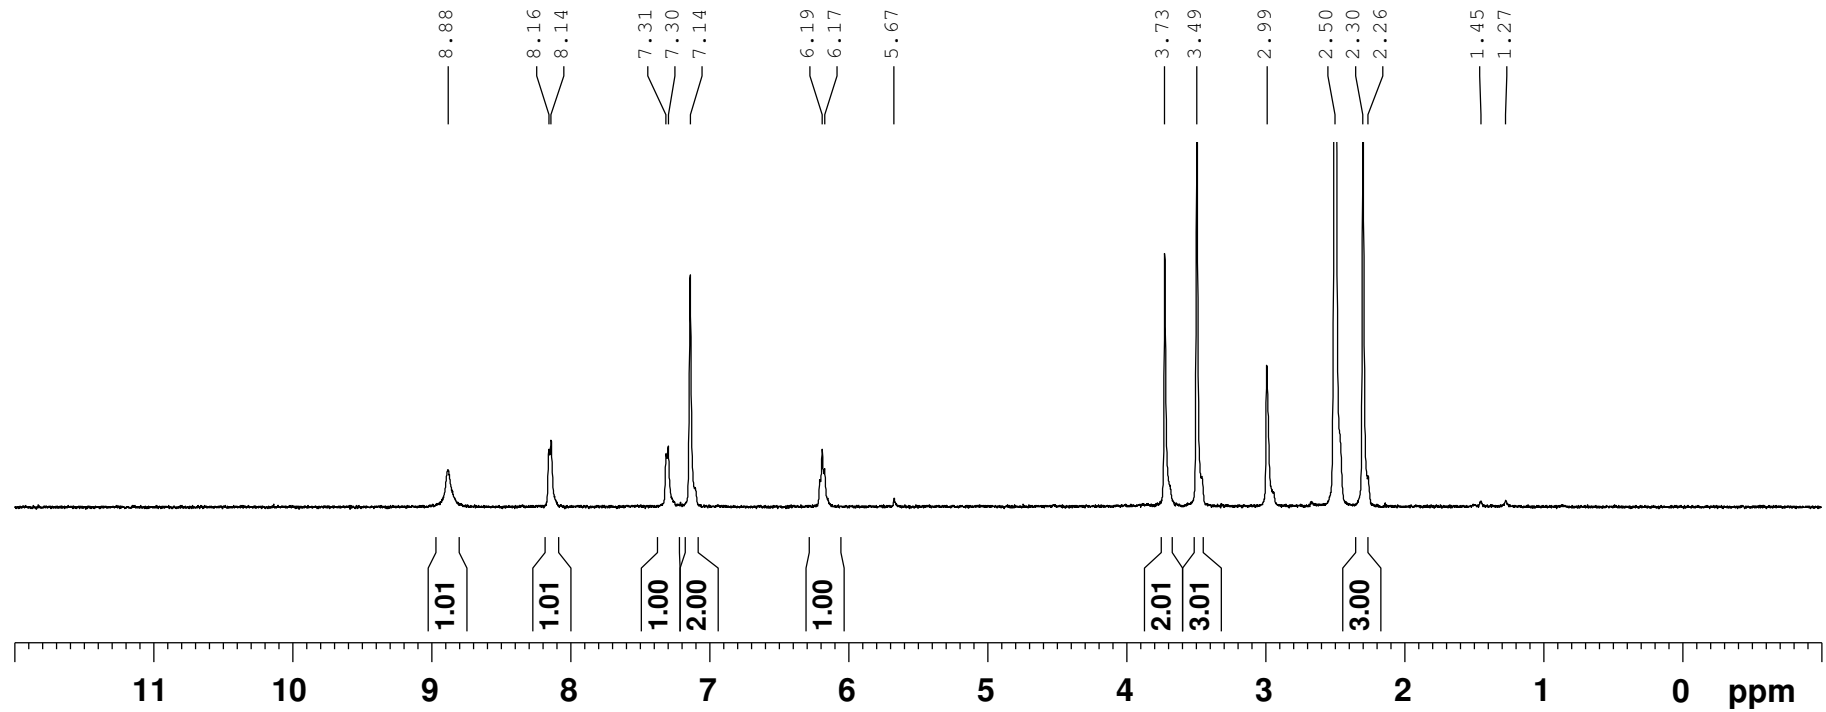

**<sup>1</sup>H NMR of 2h IN DMSO AT 100°C**

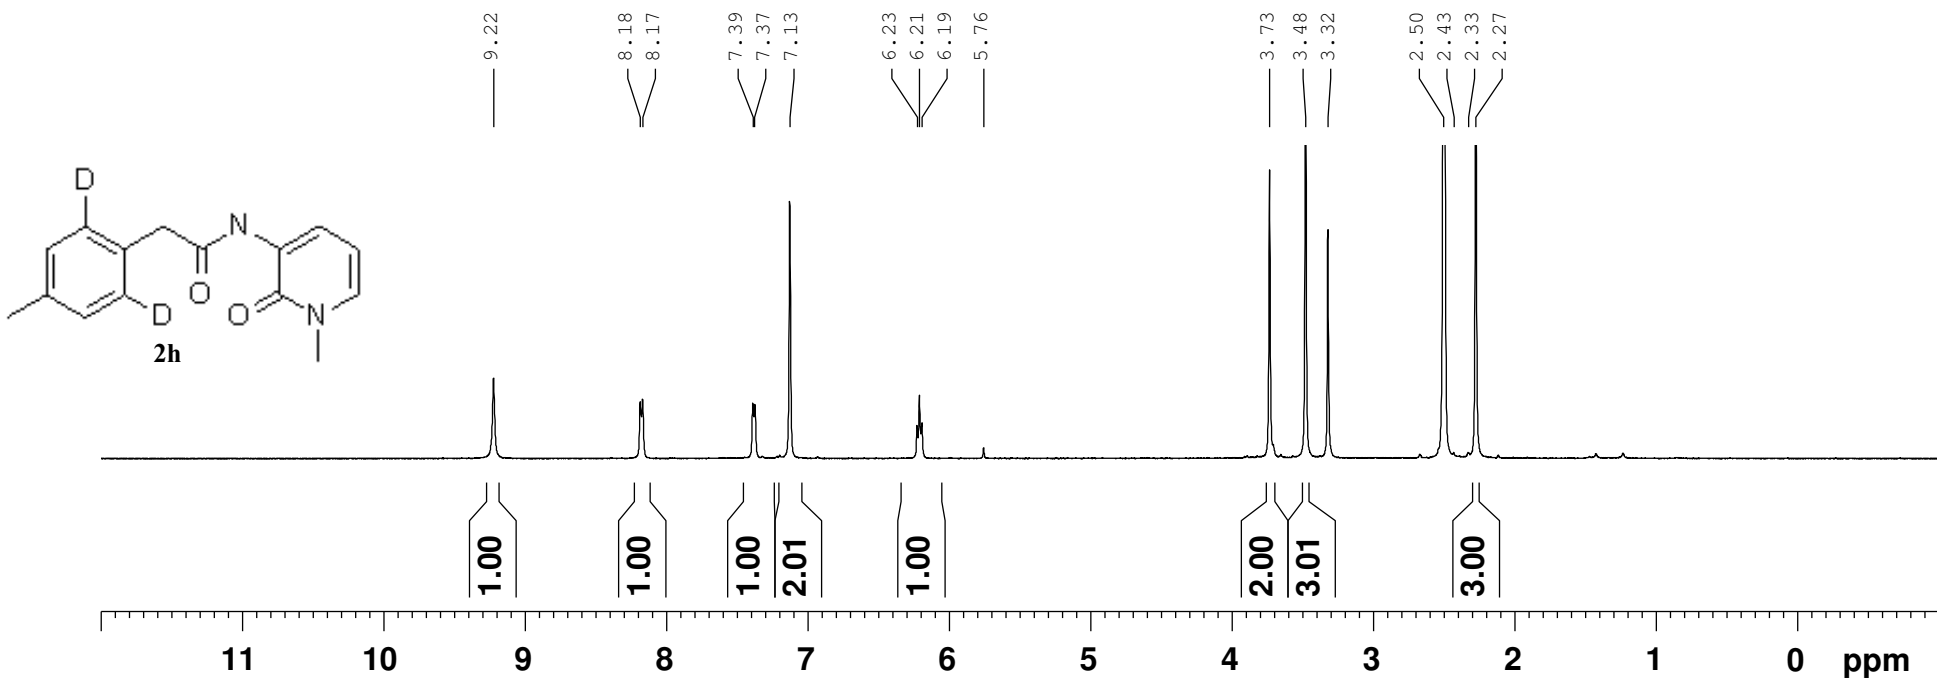

**<sup>1</sup>H NMR of 2h IN DMSO AT 20°C**



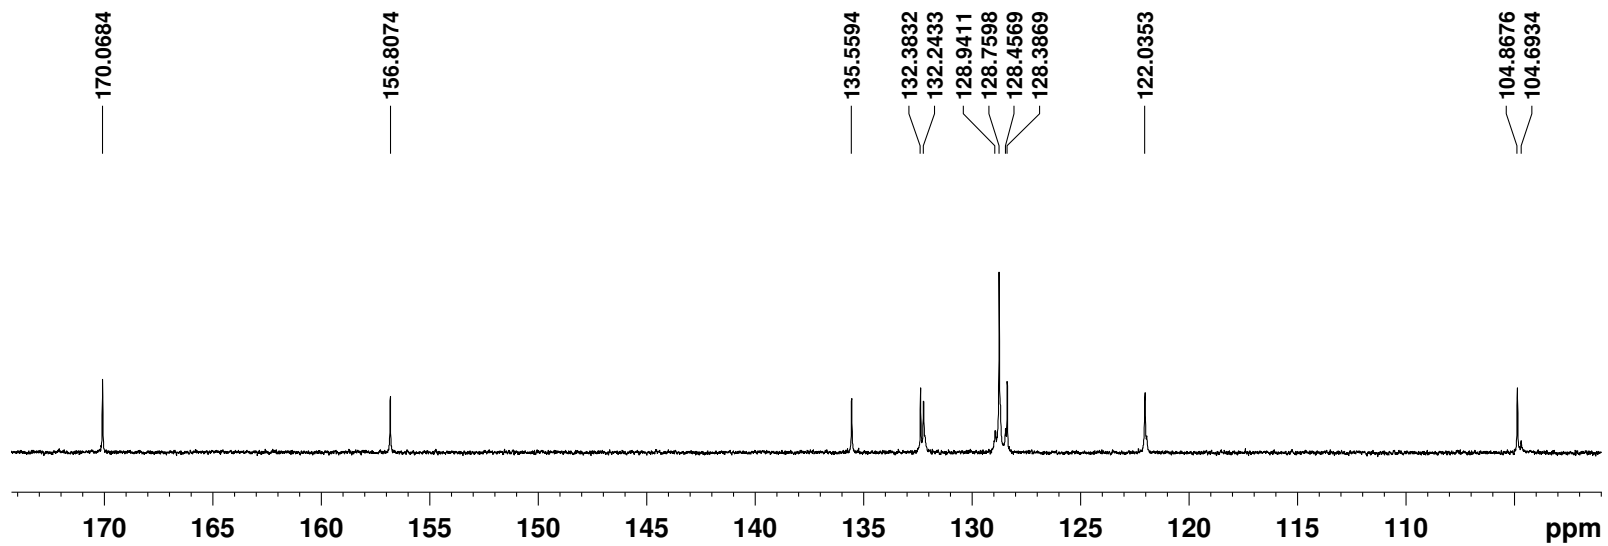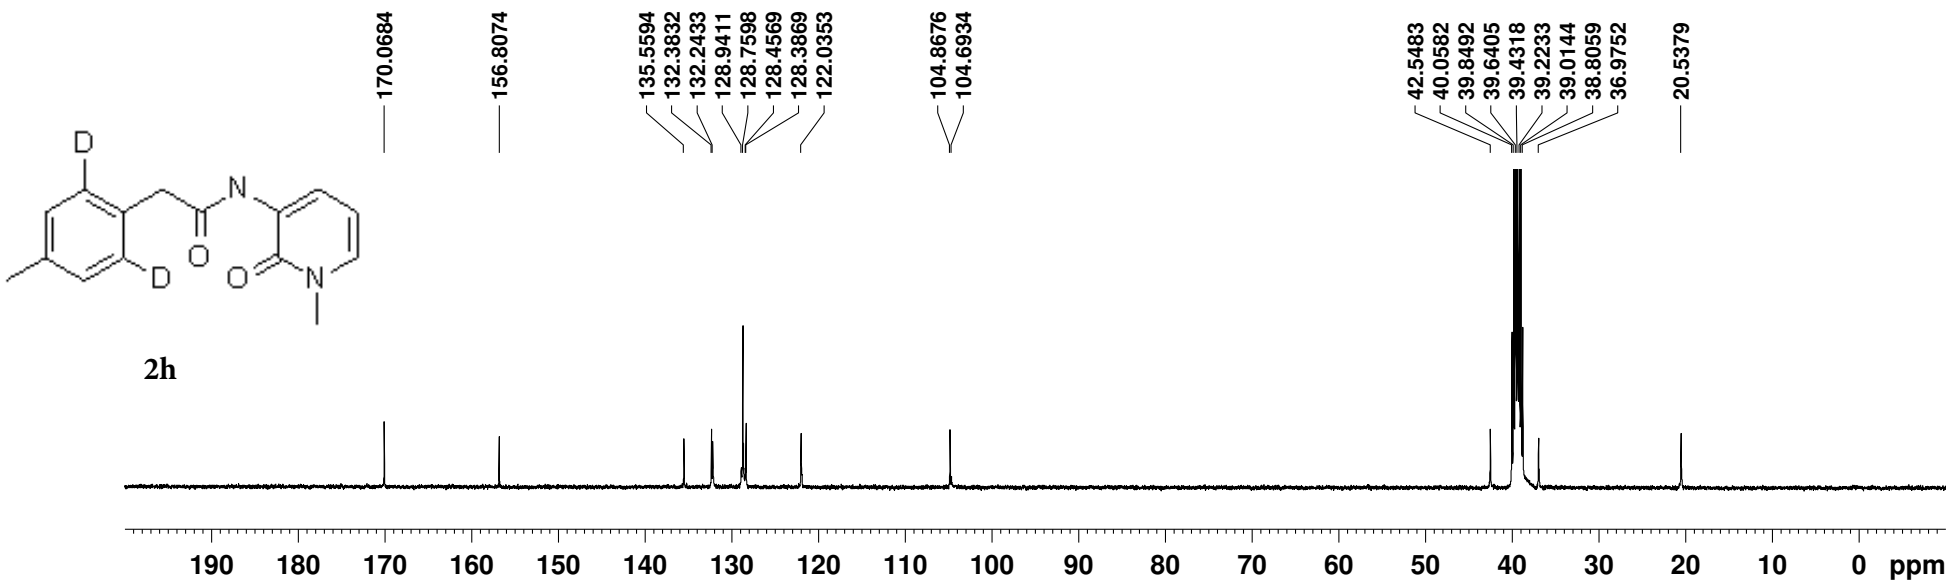

<sup>13</sup>C NMR of 2h IN DMSO

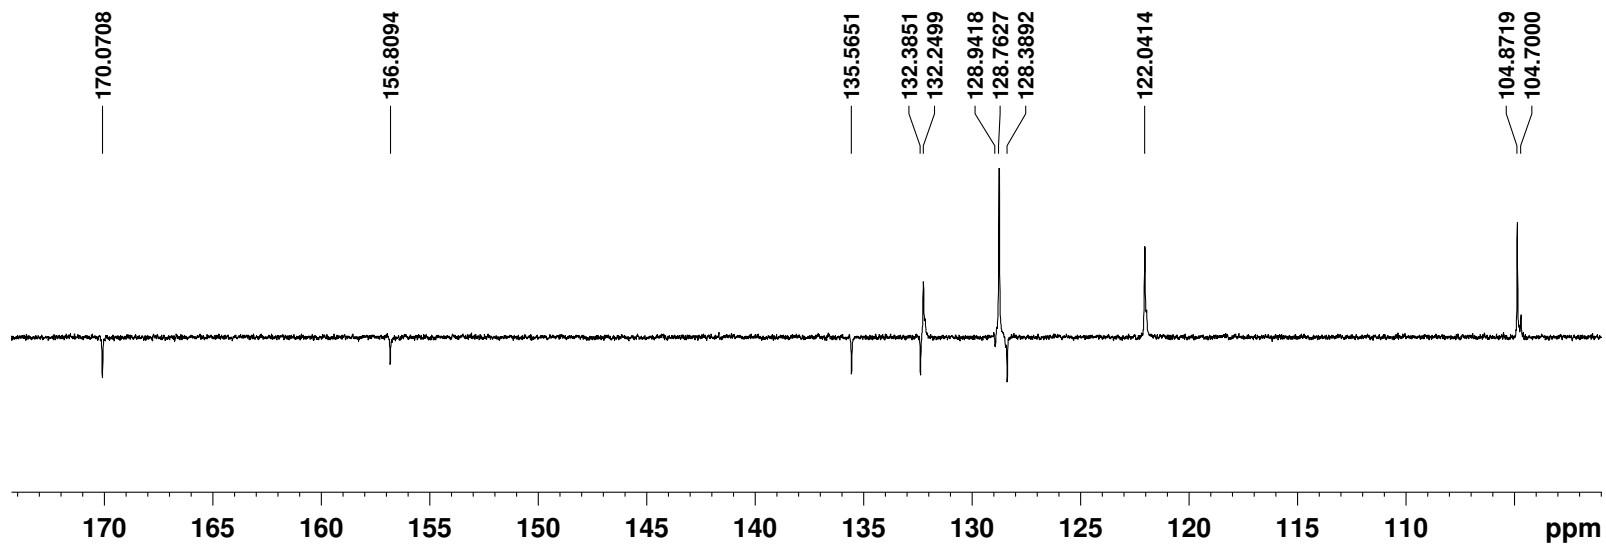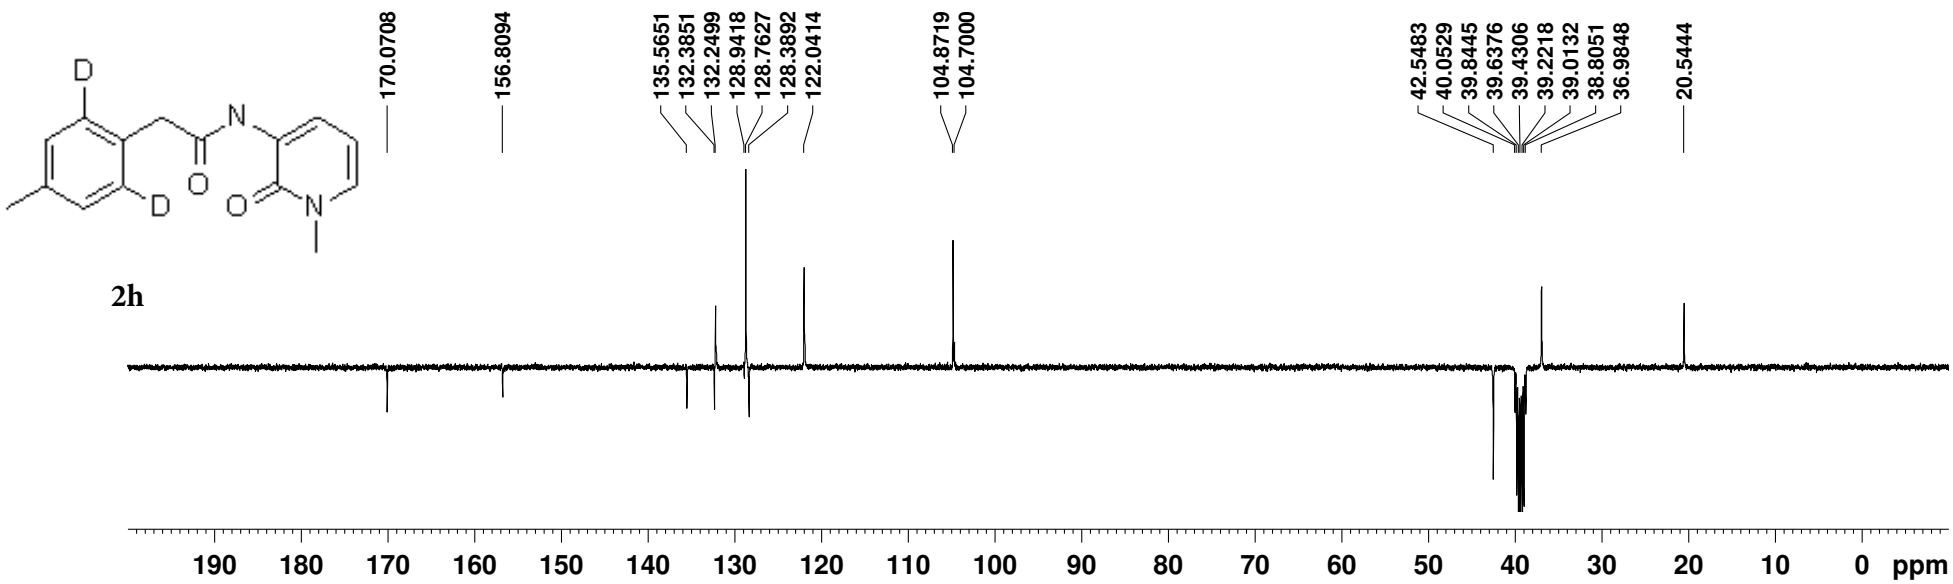

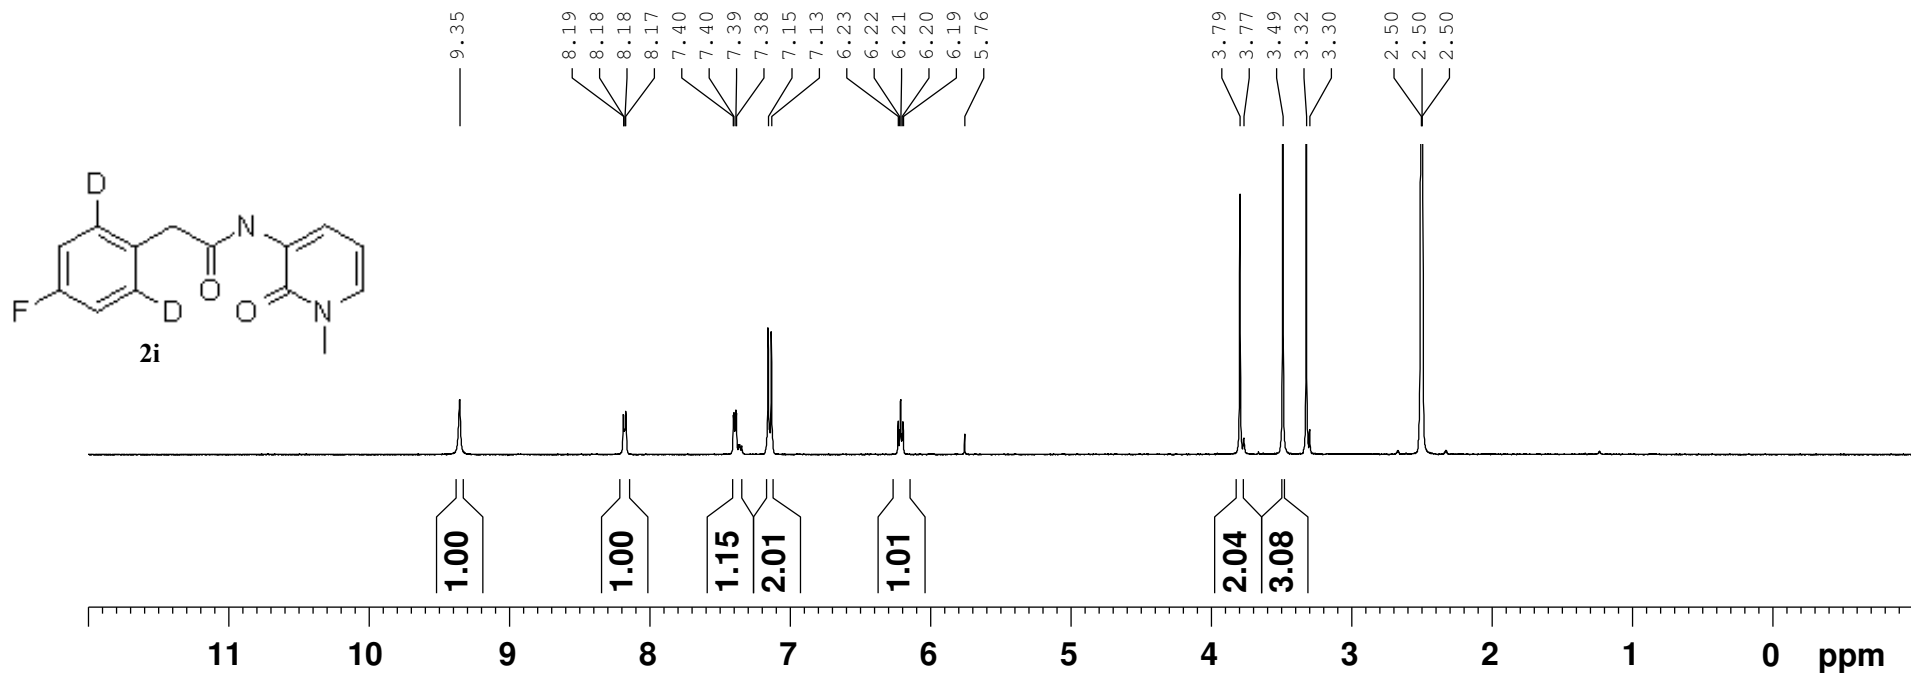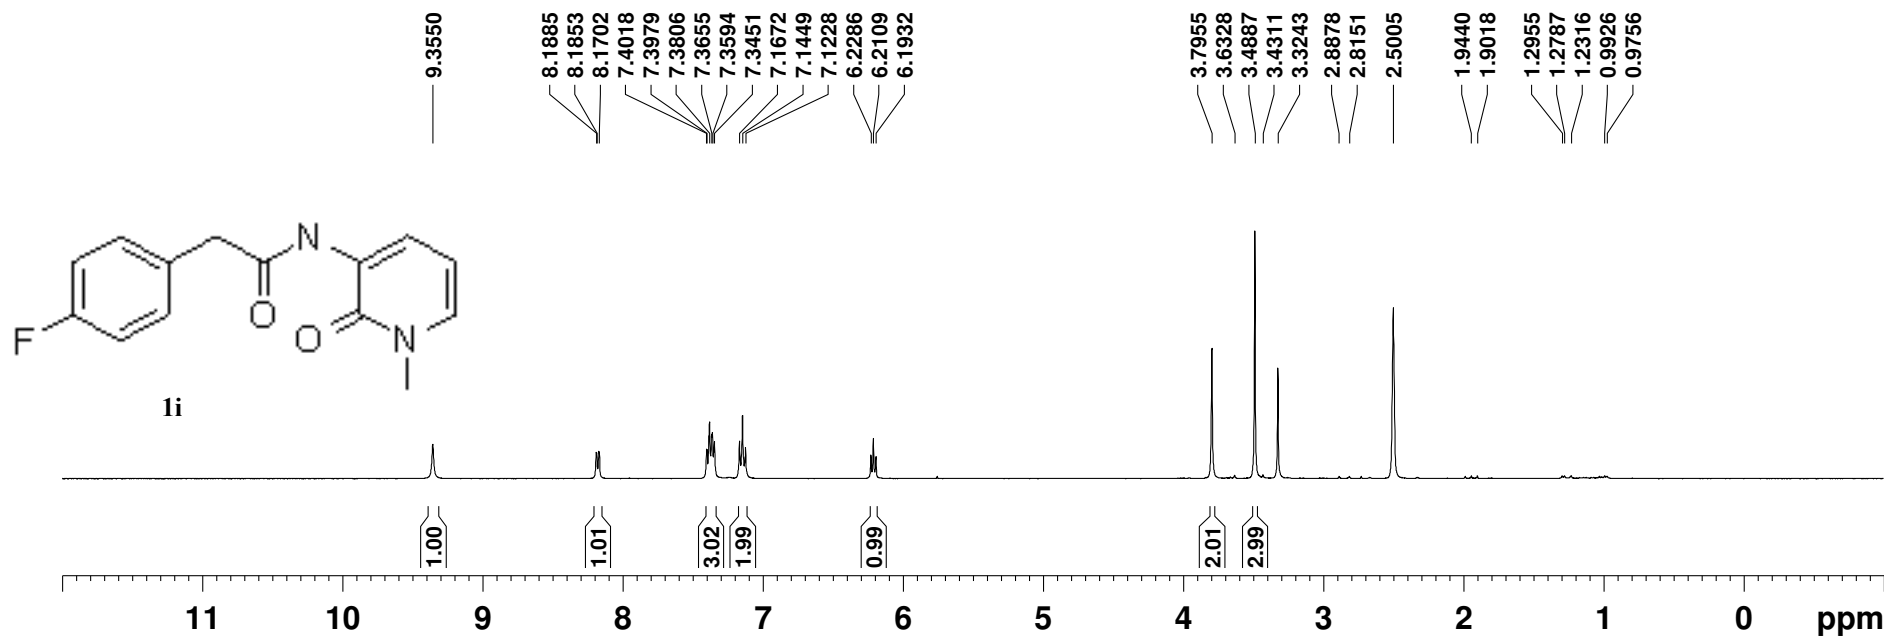

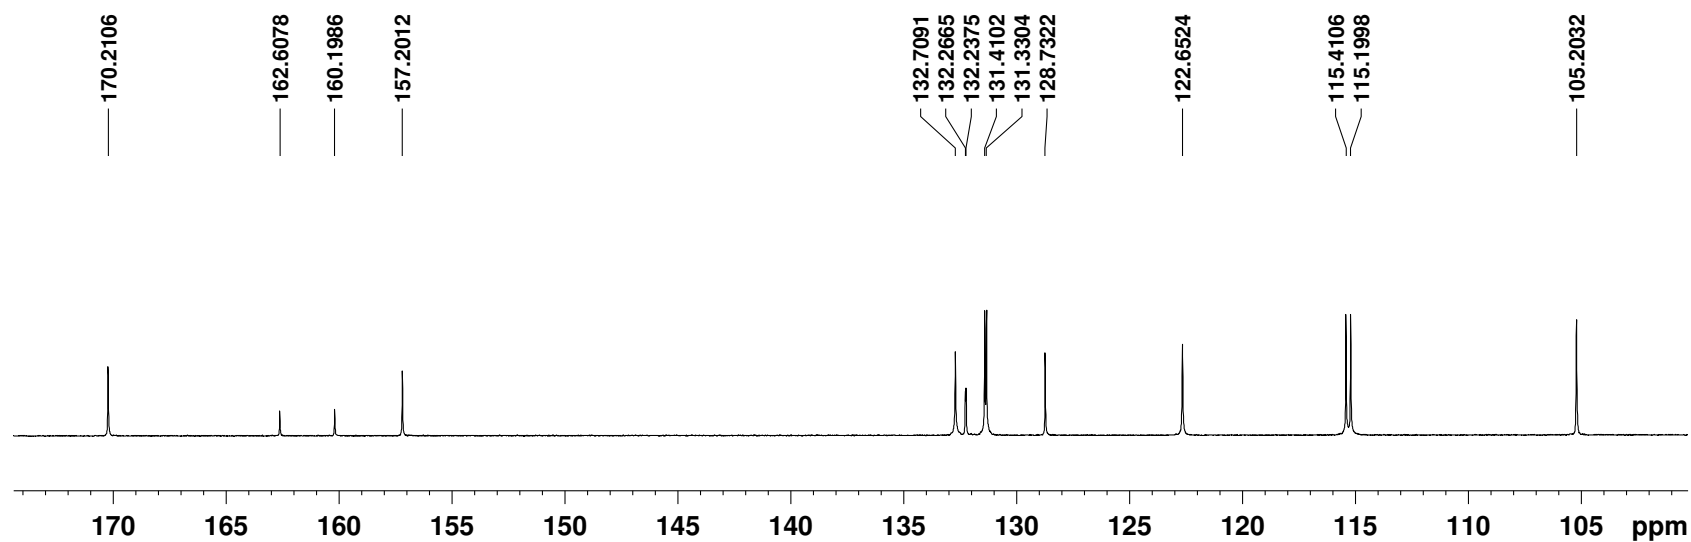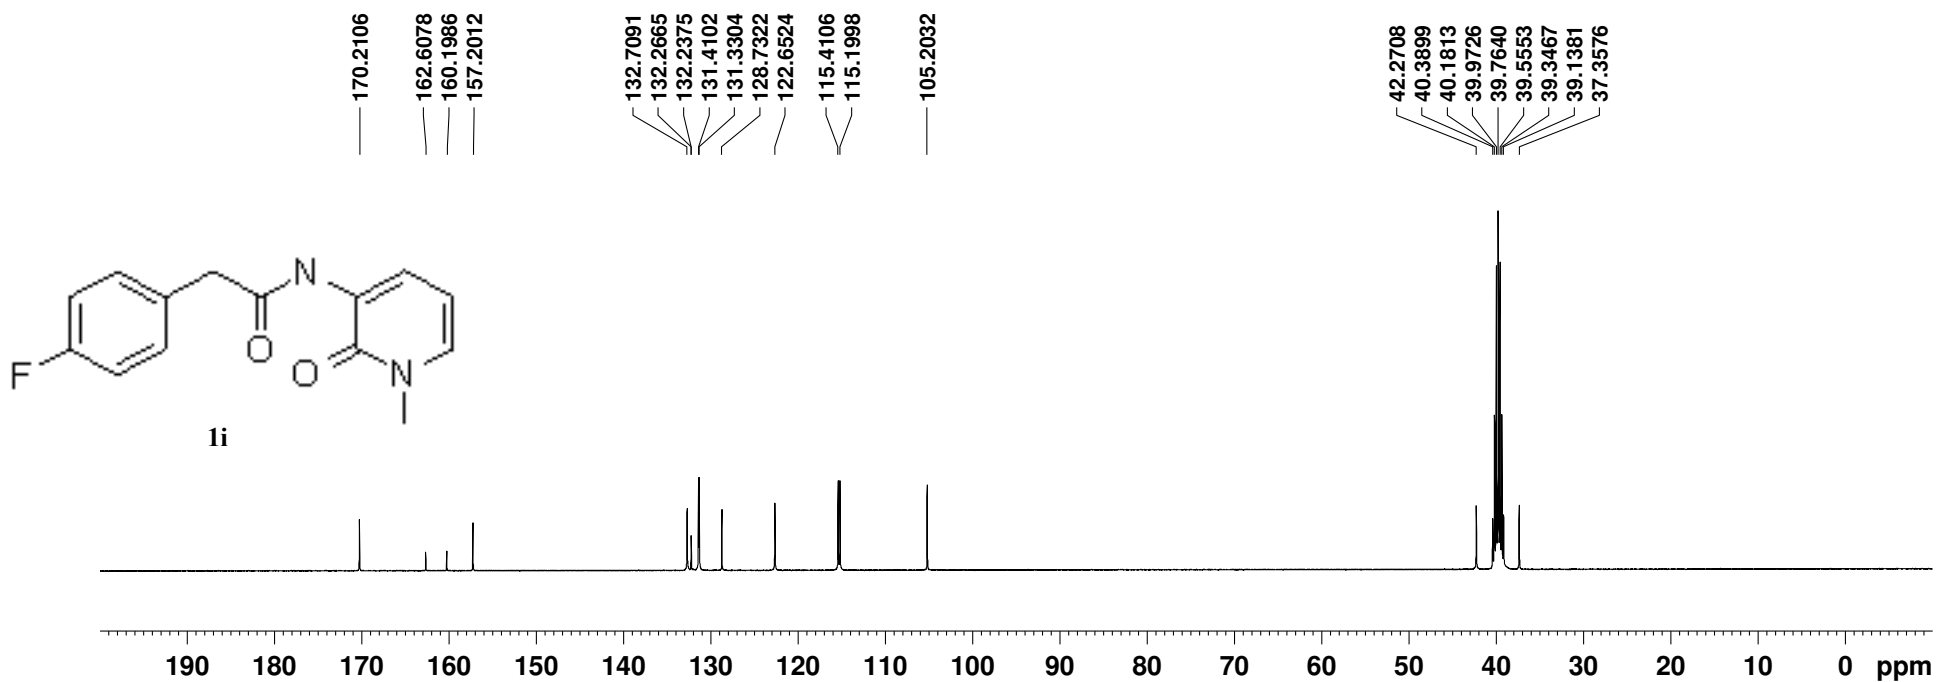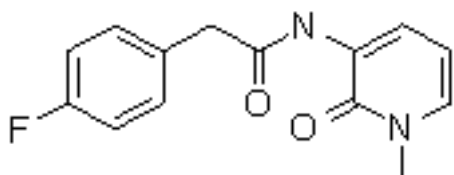

1i

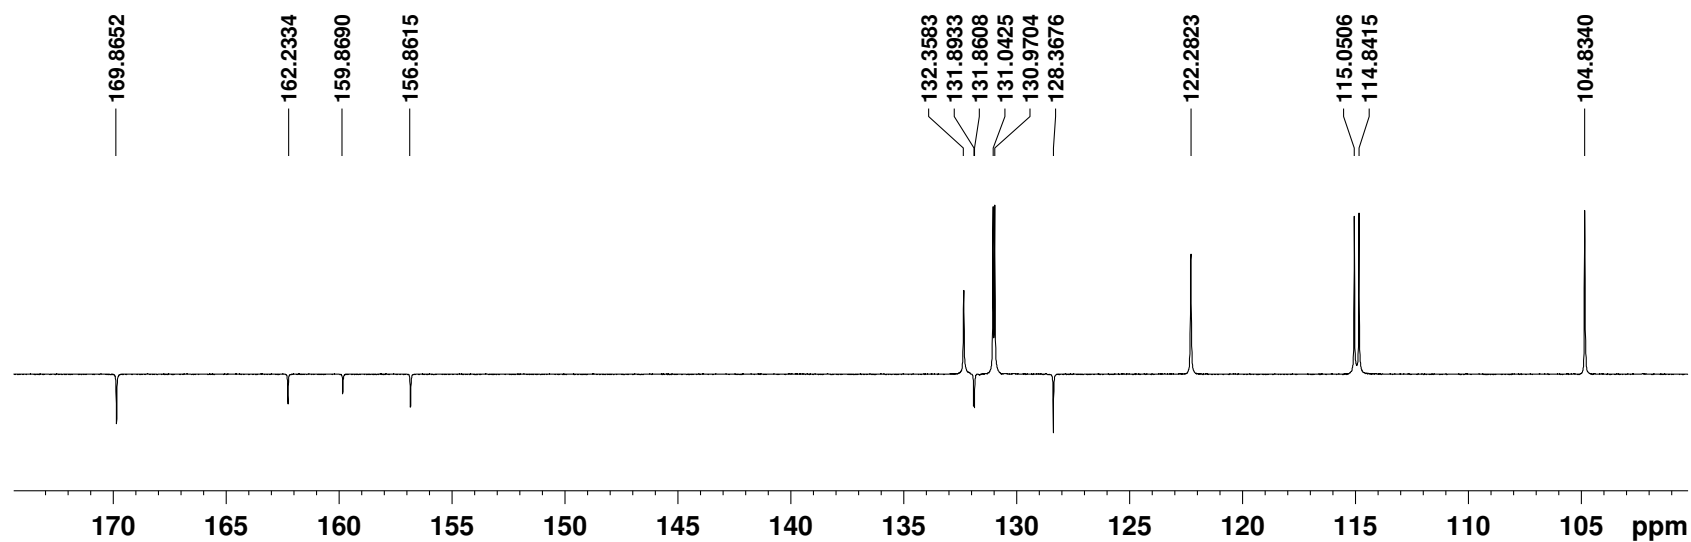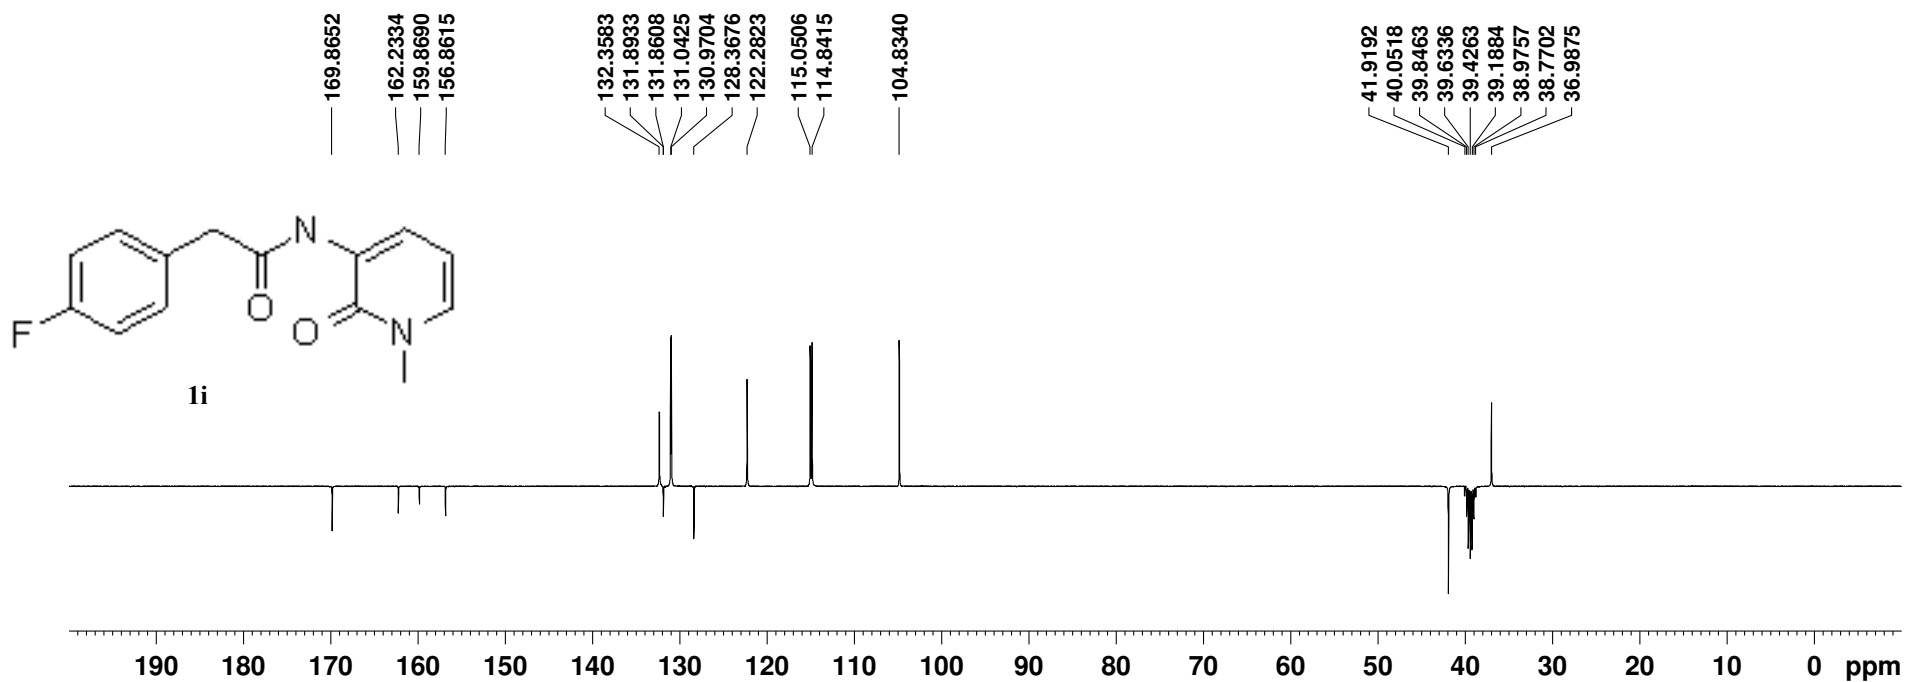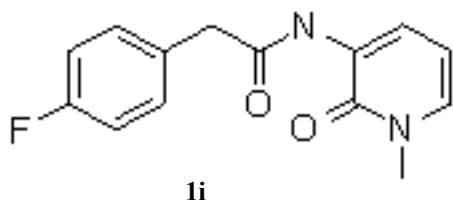

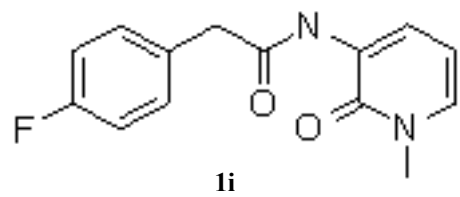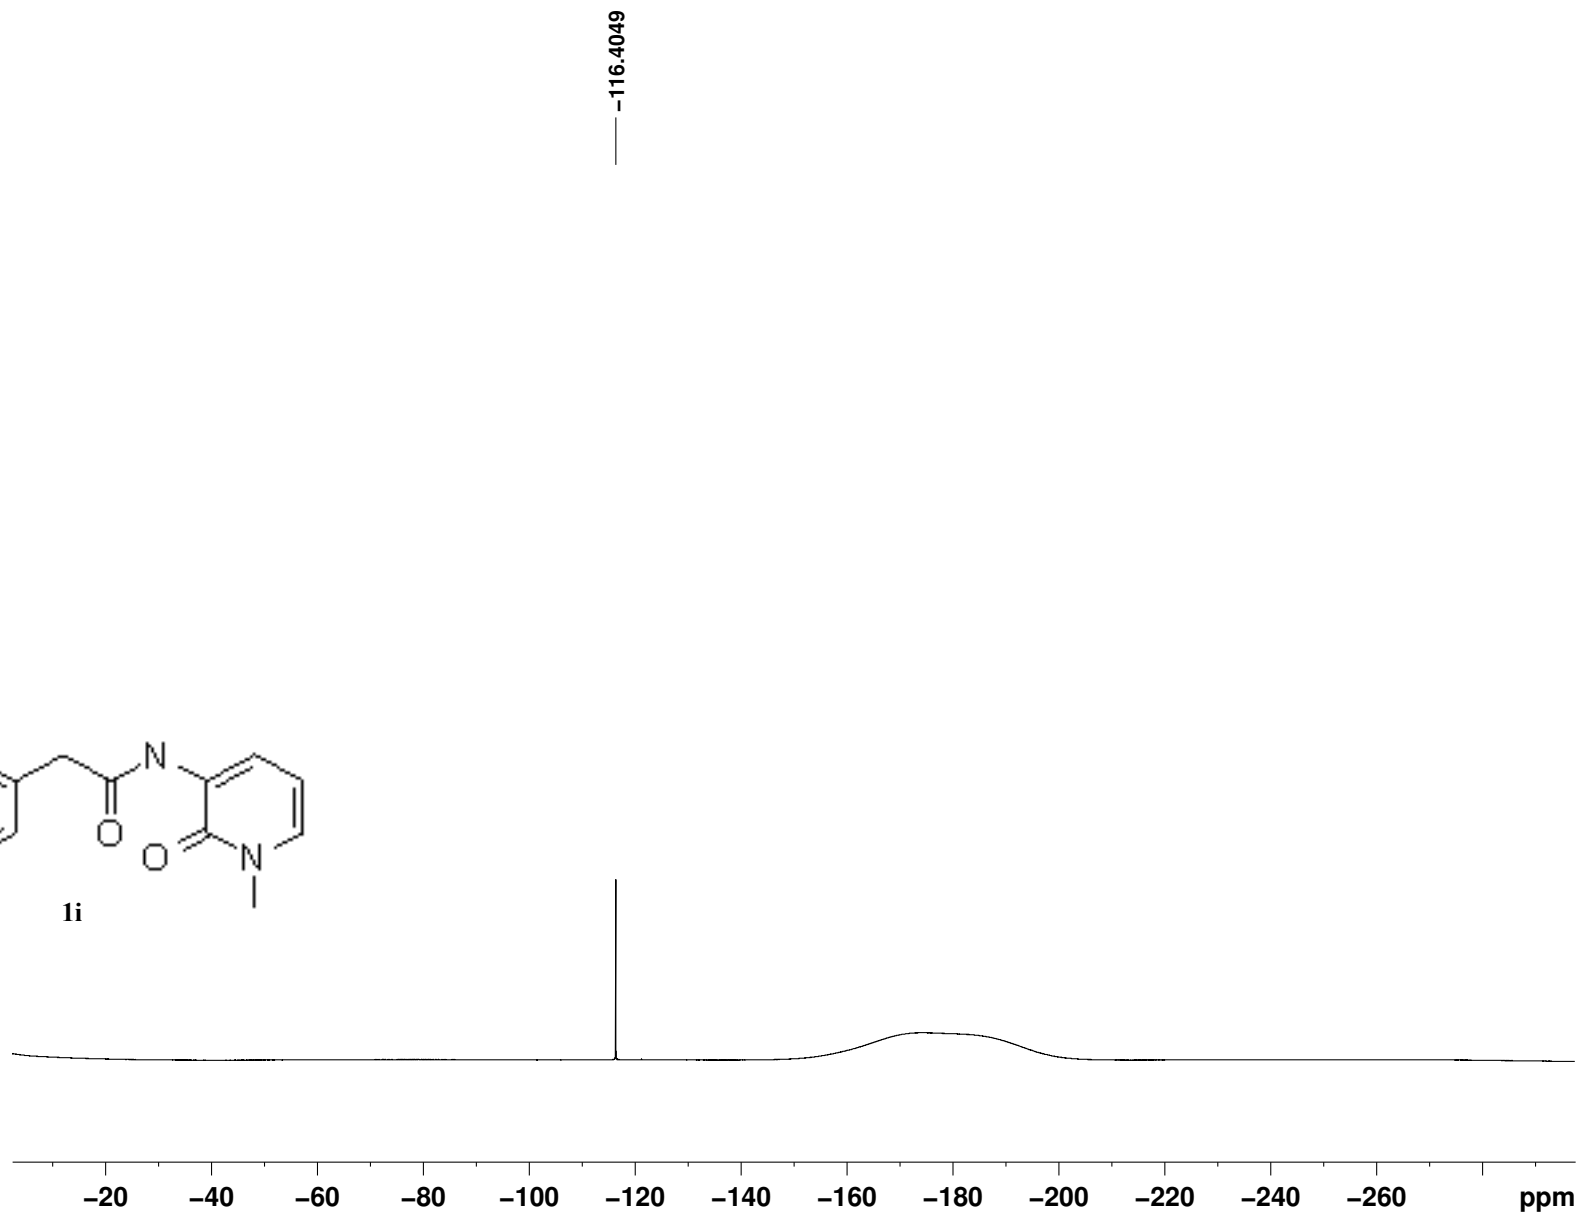

<sup>19</sup>F NMR of 1i IN DMSO

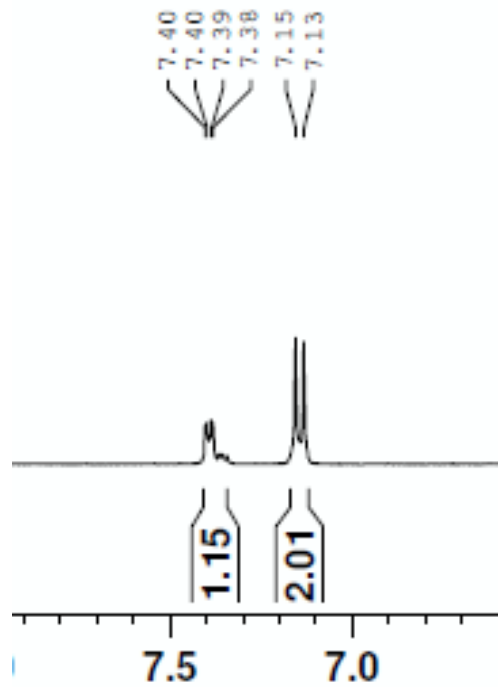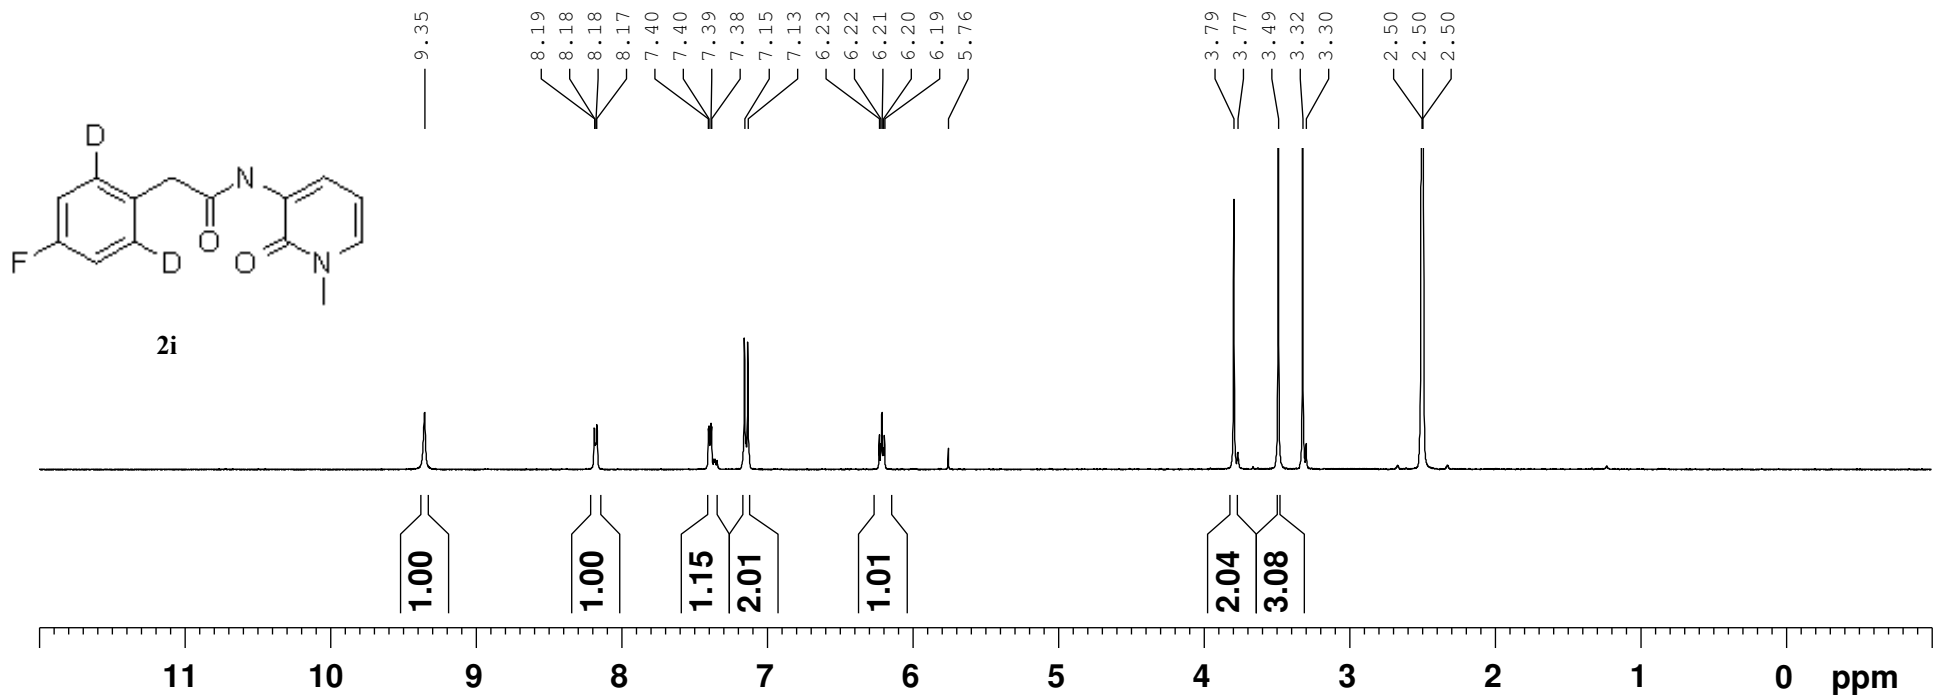

<sup>1</sup>H NMR of 2i IN DMSO

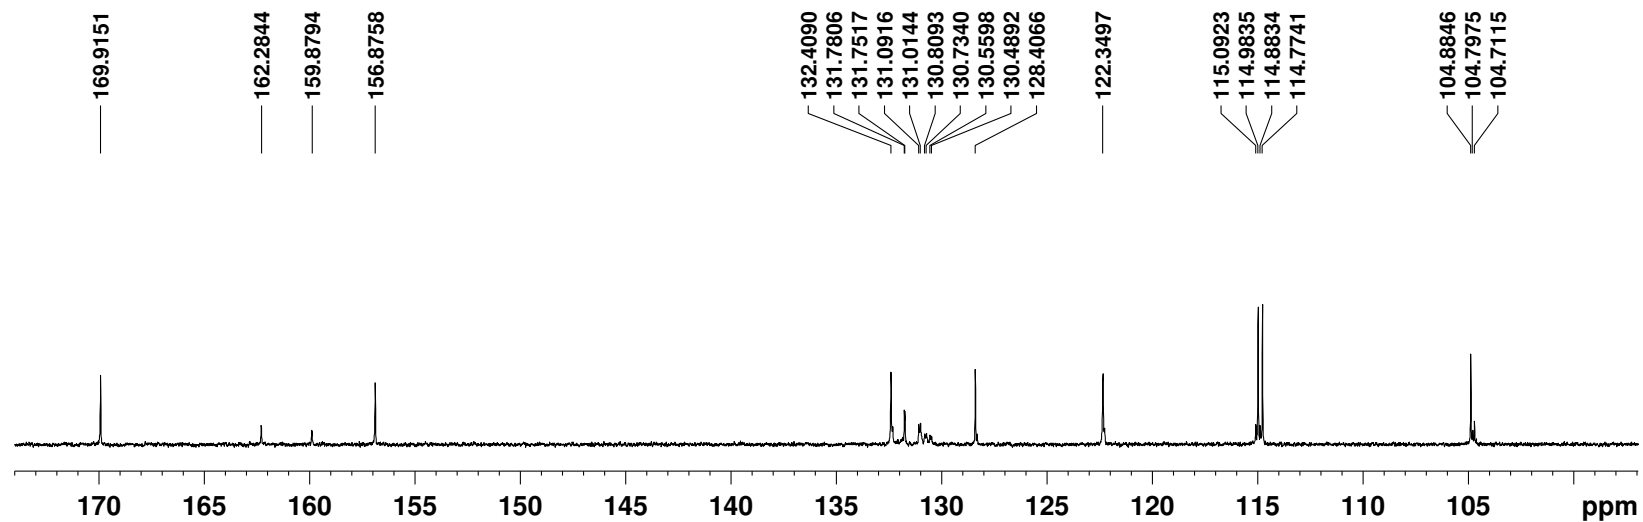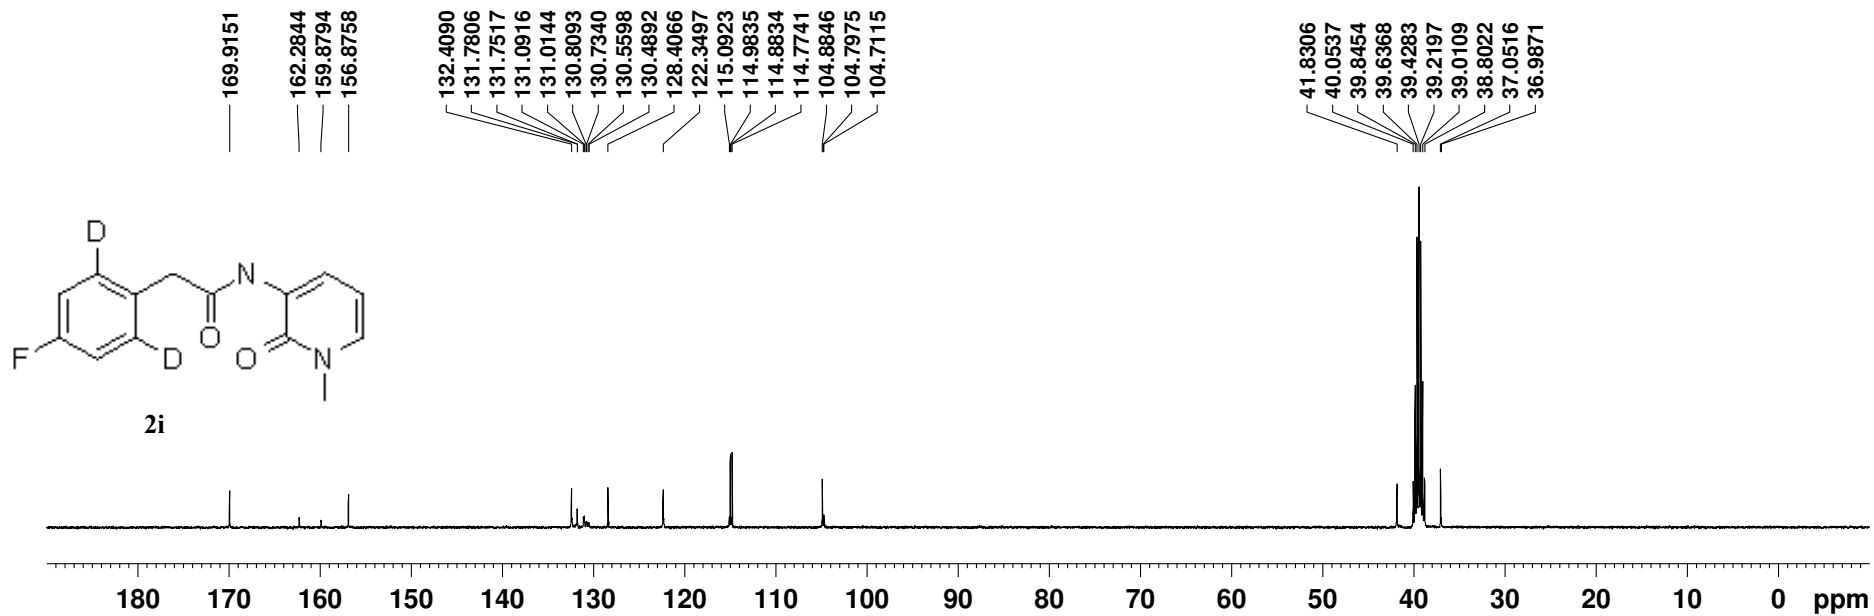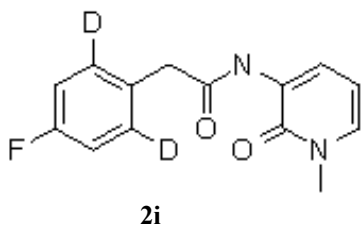



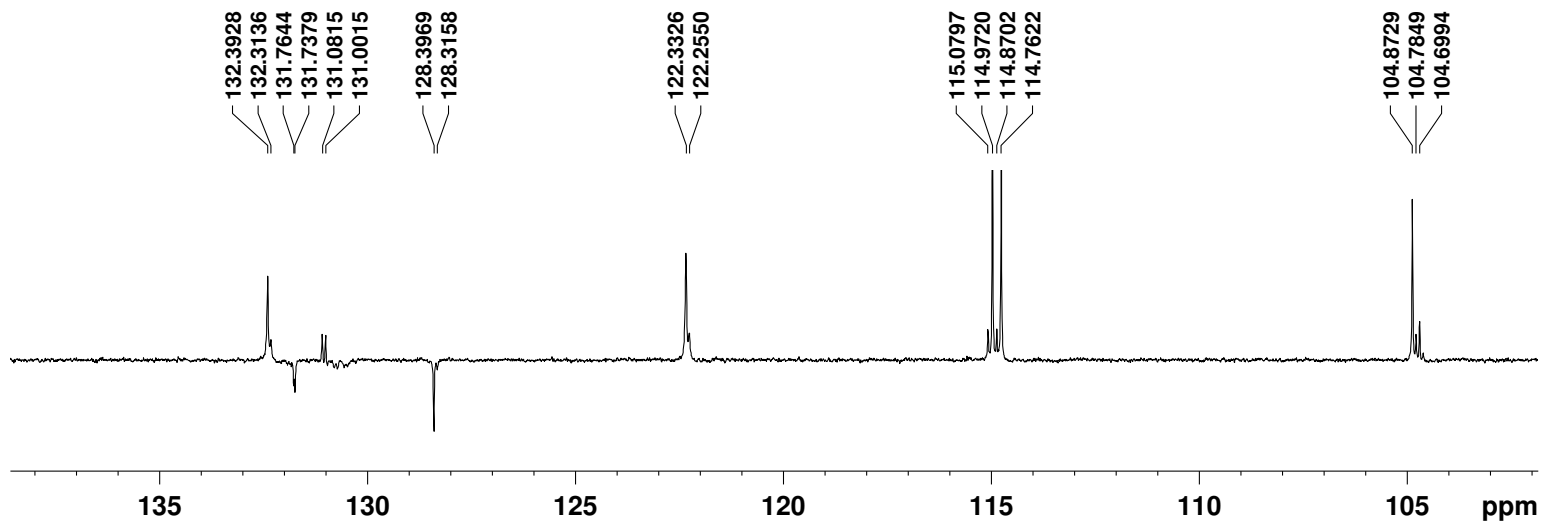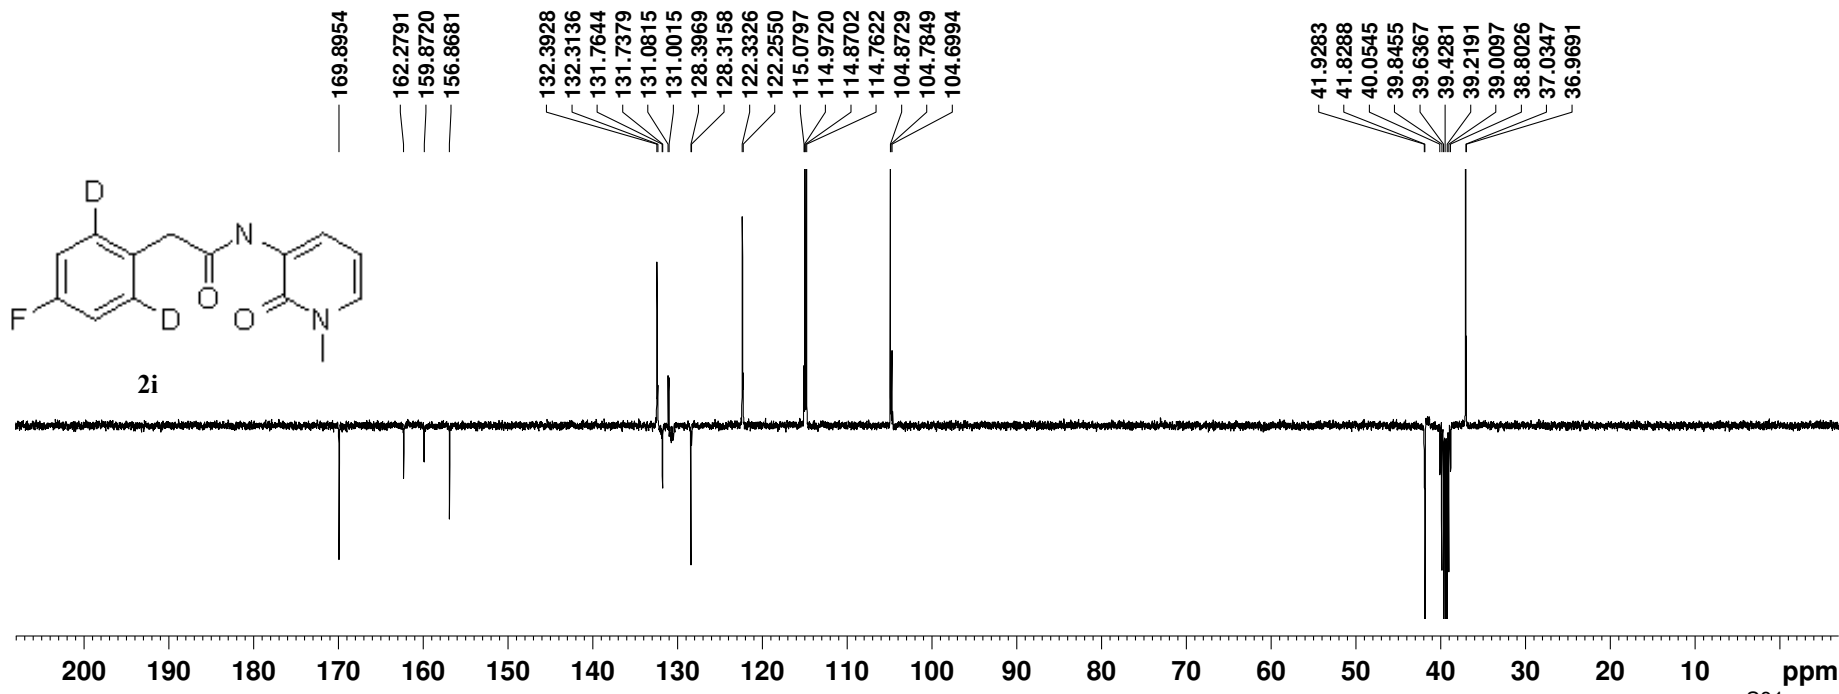

APT of 2i IN DMSO

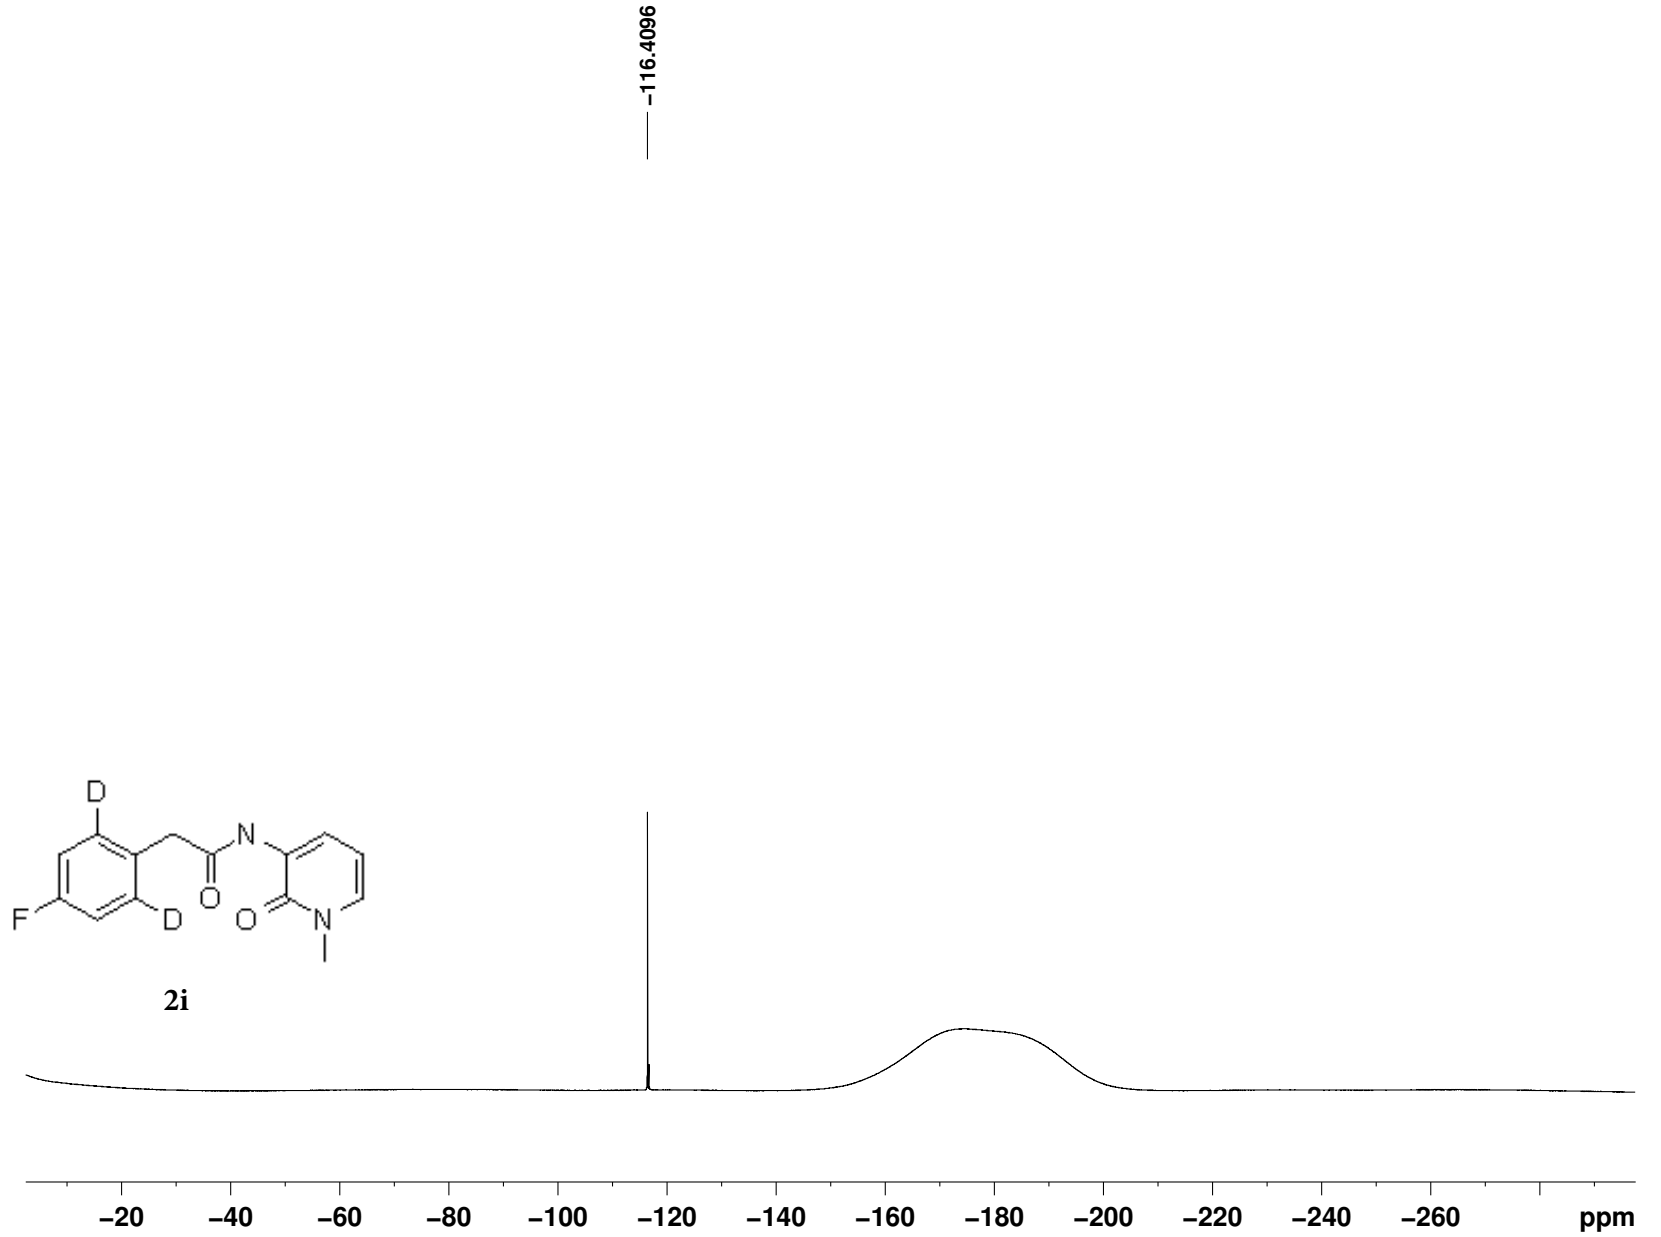

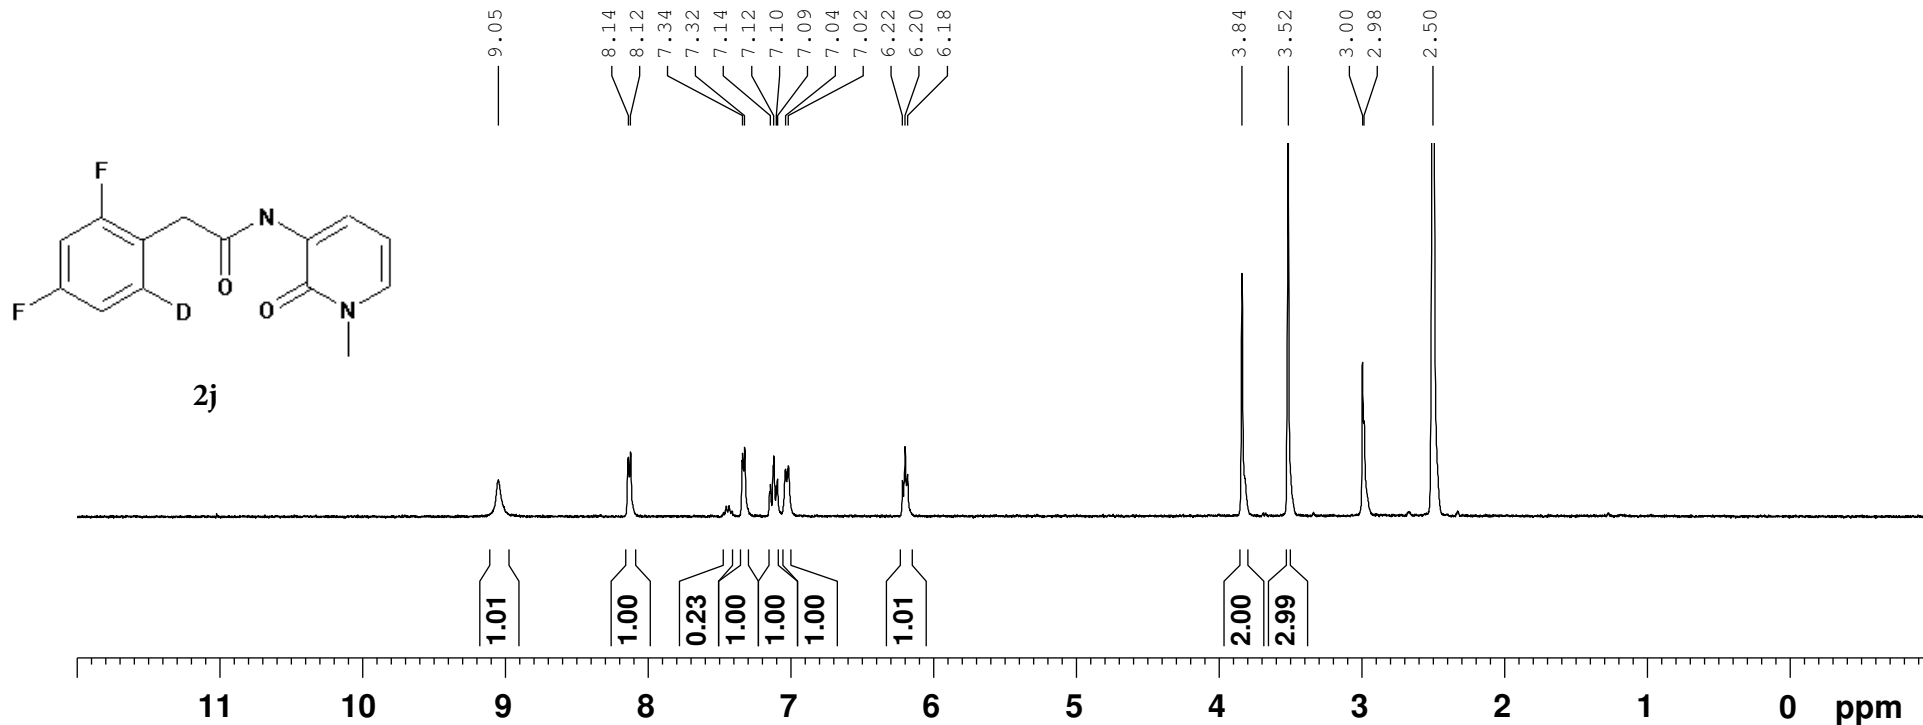

<sup>1</sup>H NMR of **2j** IN DMSO AT 100°C

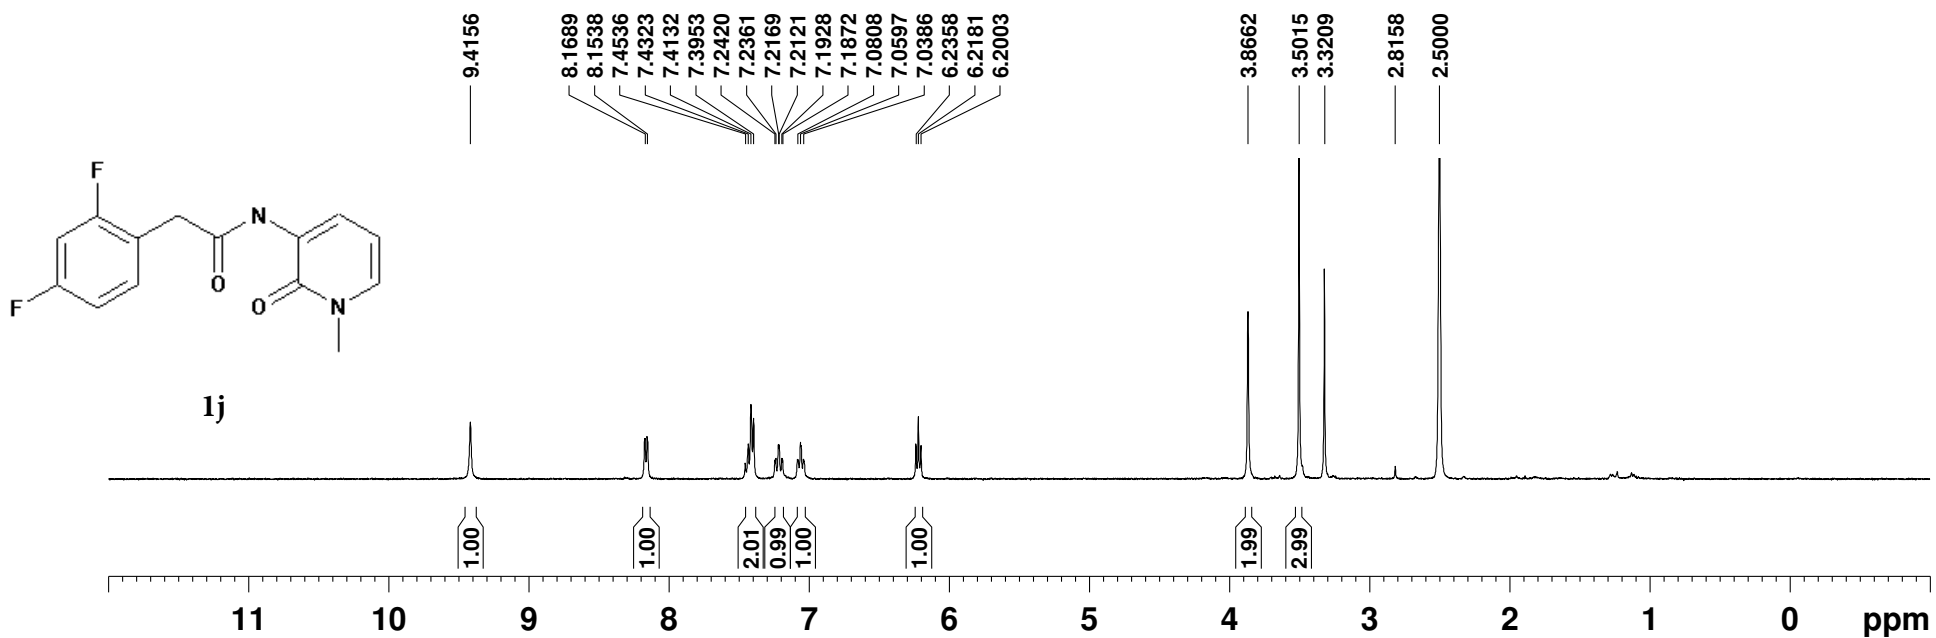

<sup>1</sup>H NMR of **1j** IN DMSO AT 20°C

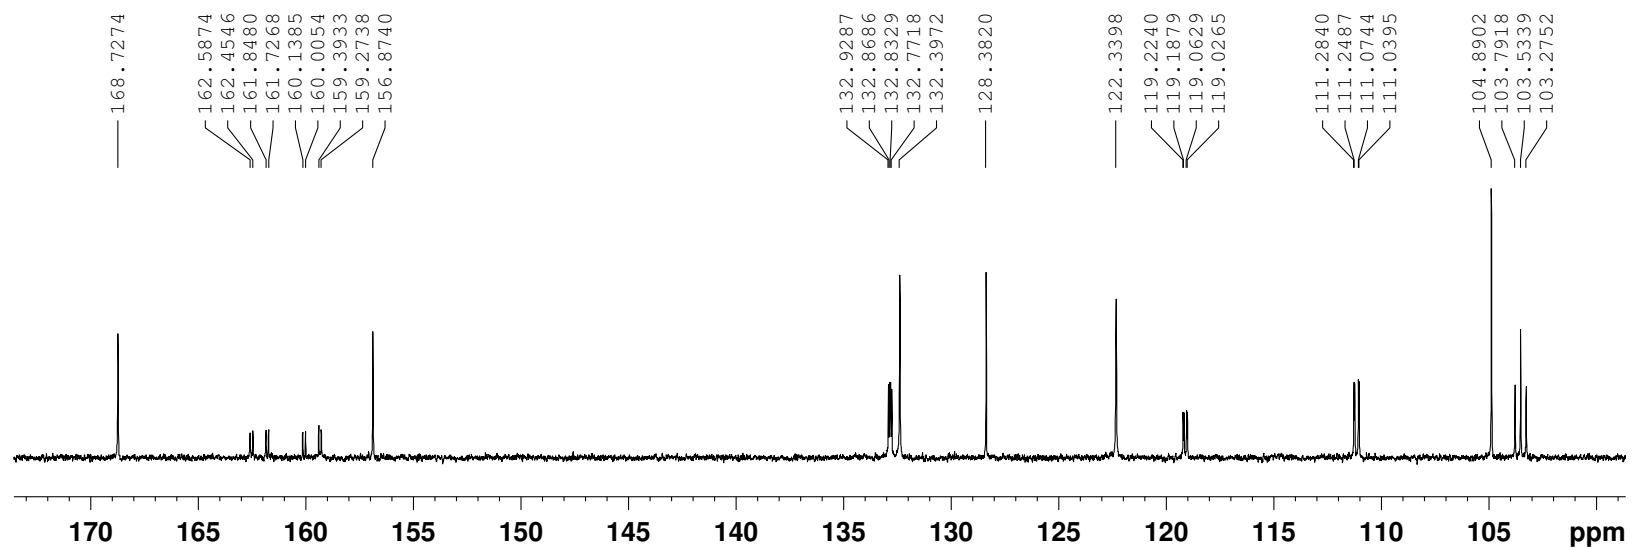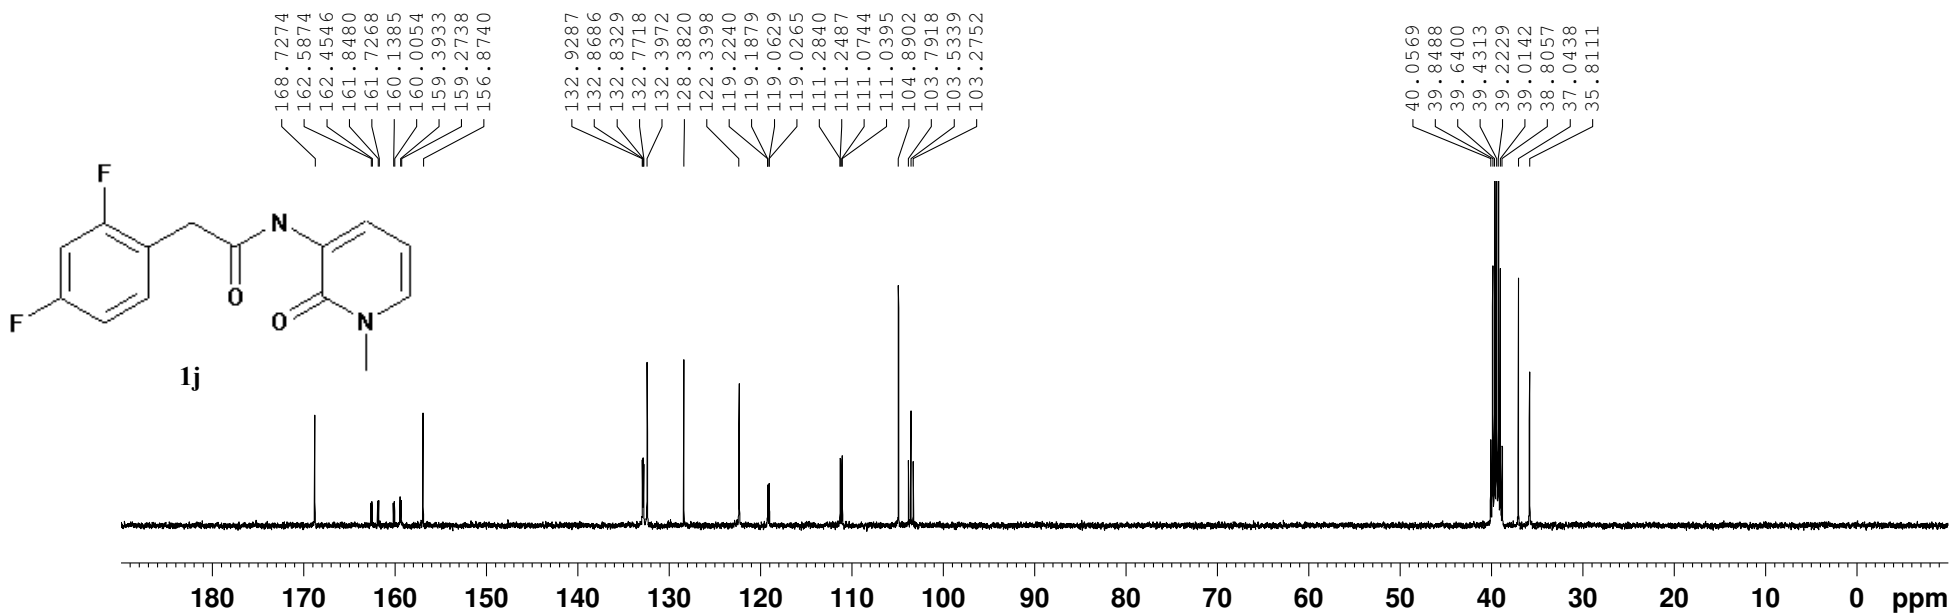

<sup>13</sup>C NMR of 1j IN DMSO

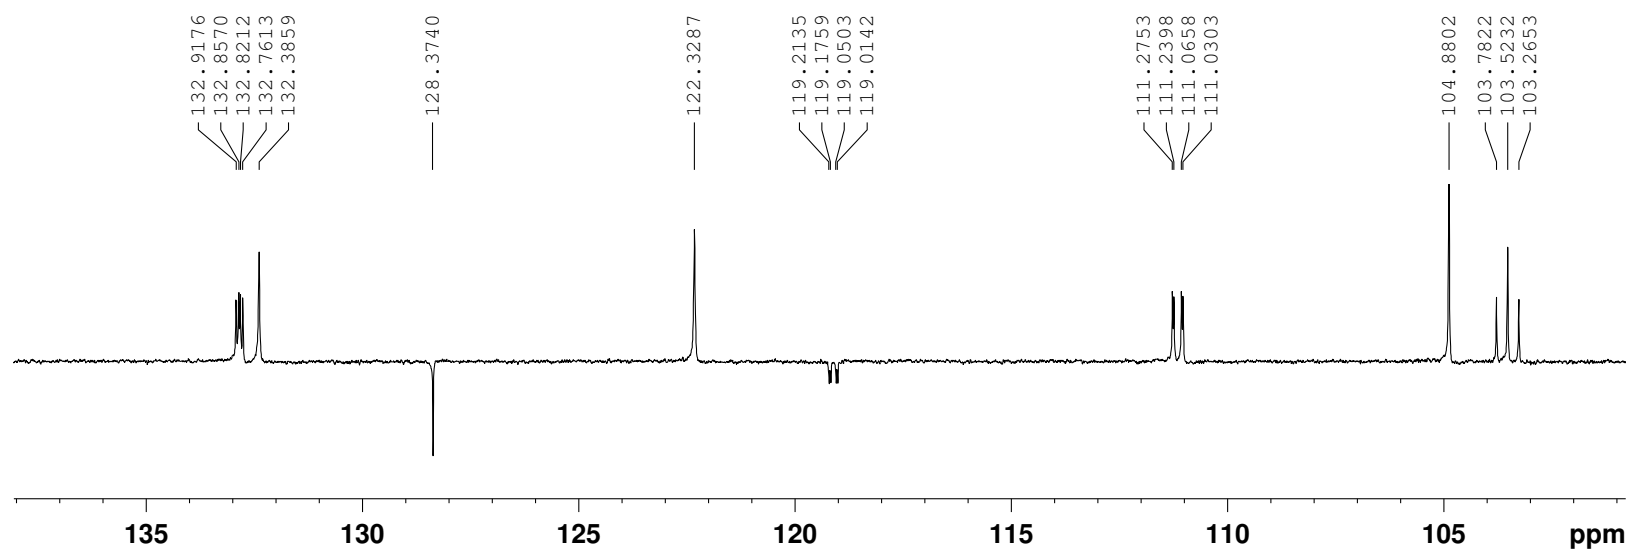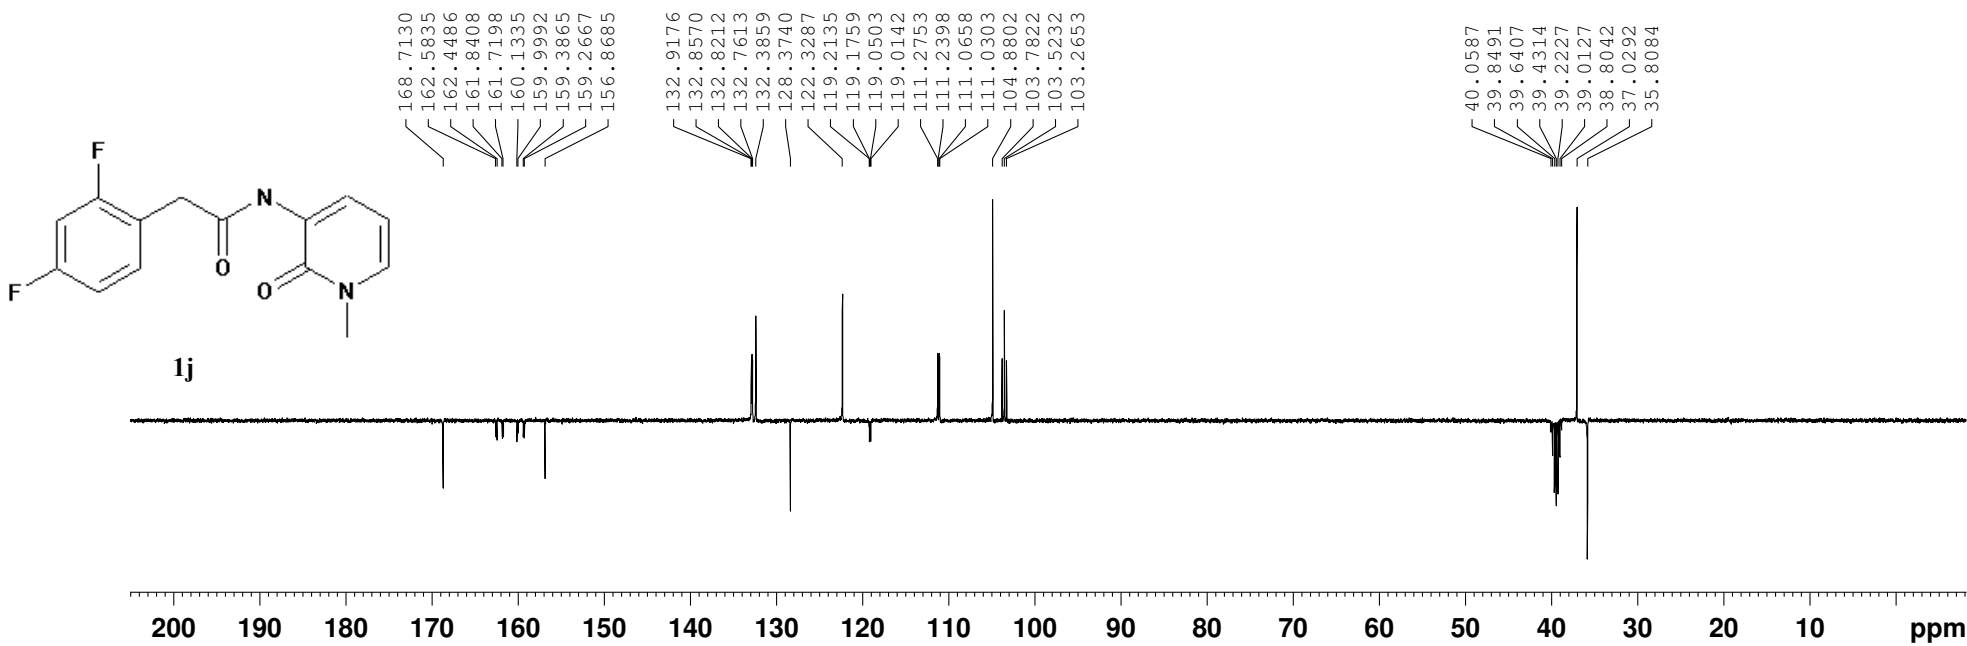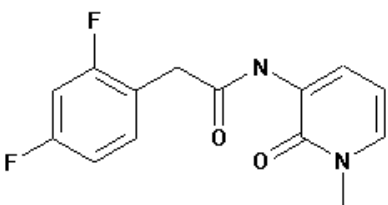

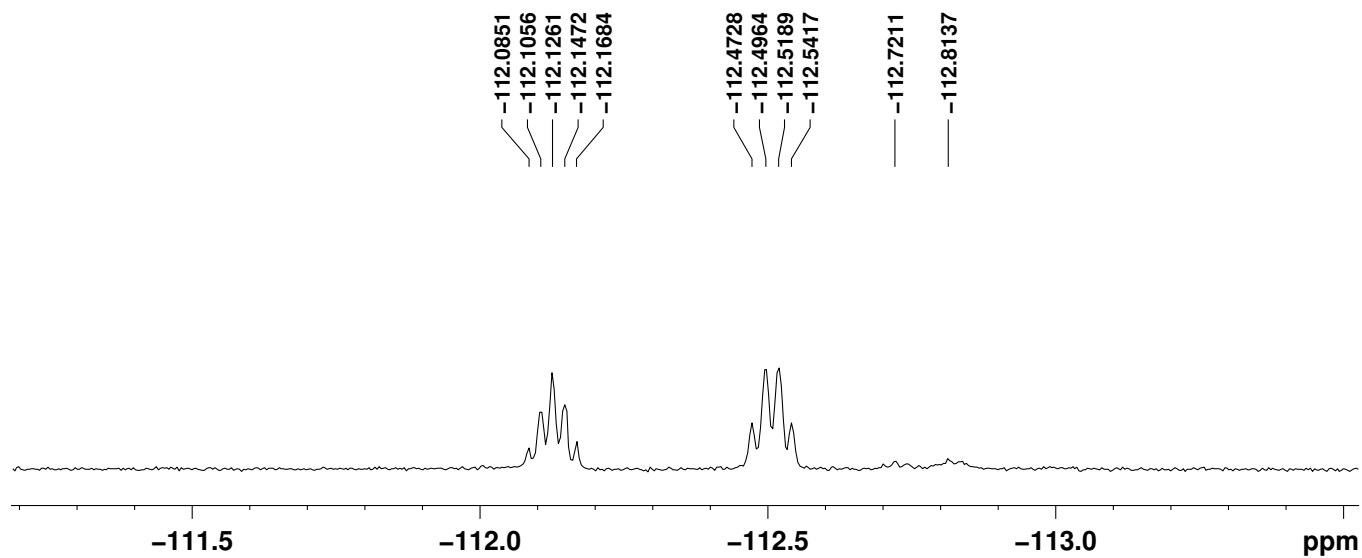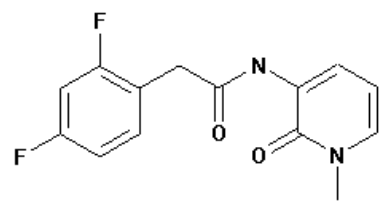

1j

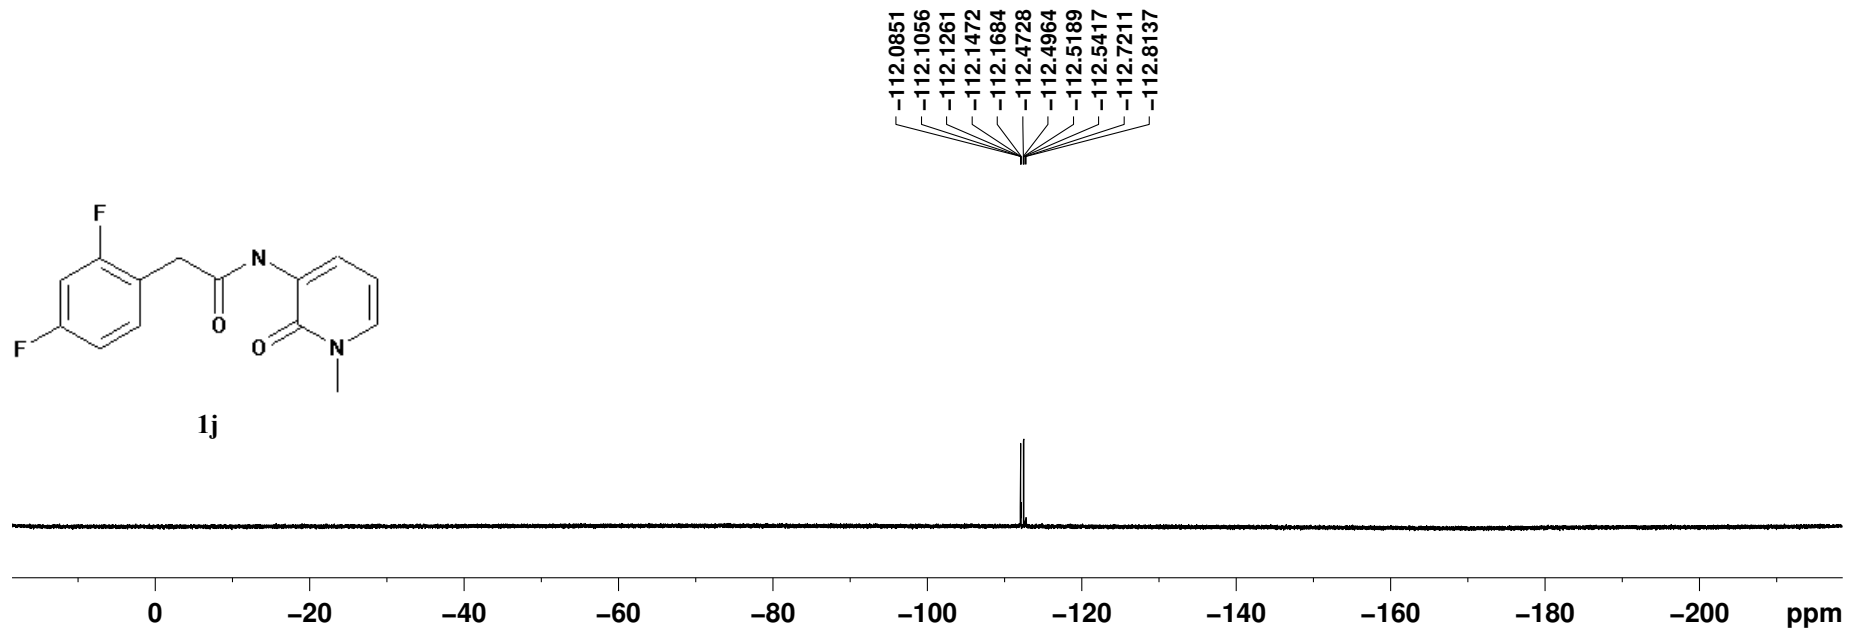

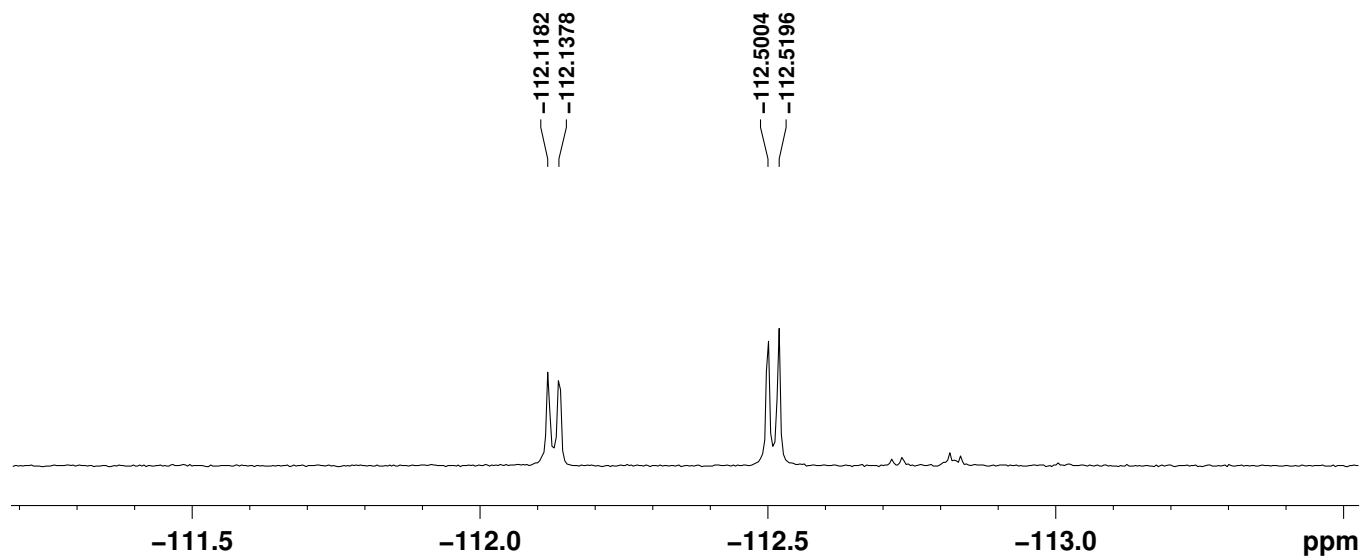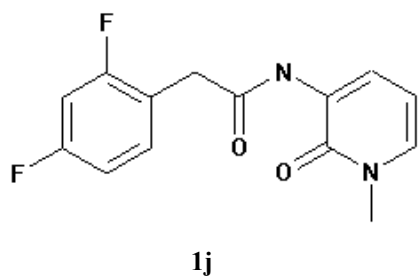

Chemical shift values (ppm):  
-112.1182  
-112.1378  
-112.5004  
-112.5196

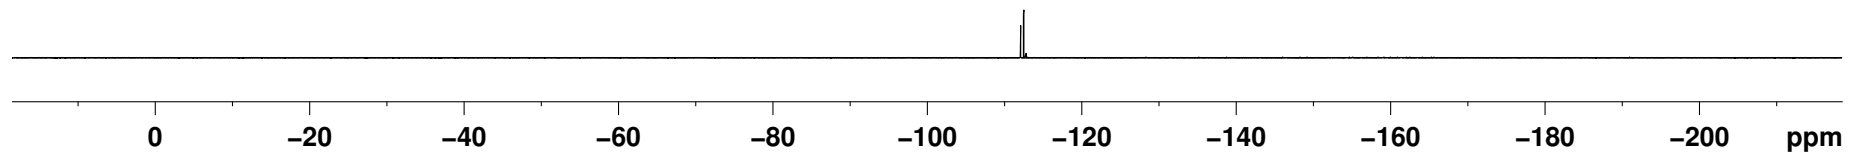

<sup>19</sup>F NMR of 1j IN DMSO (PDC)

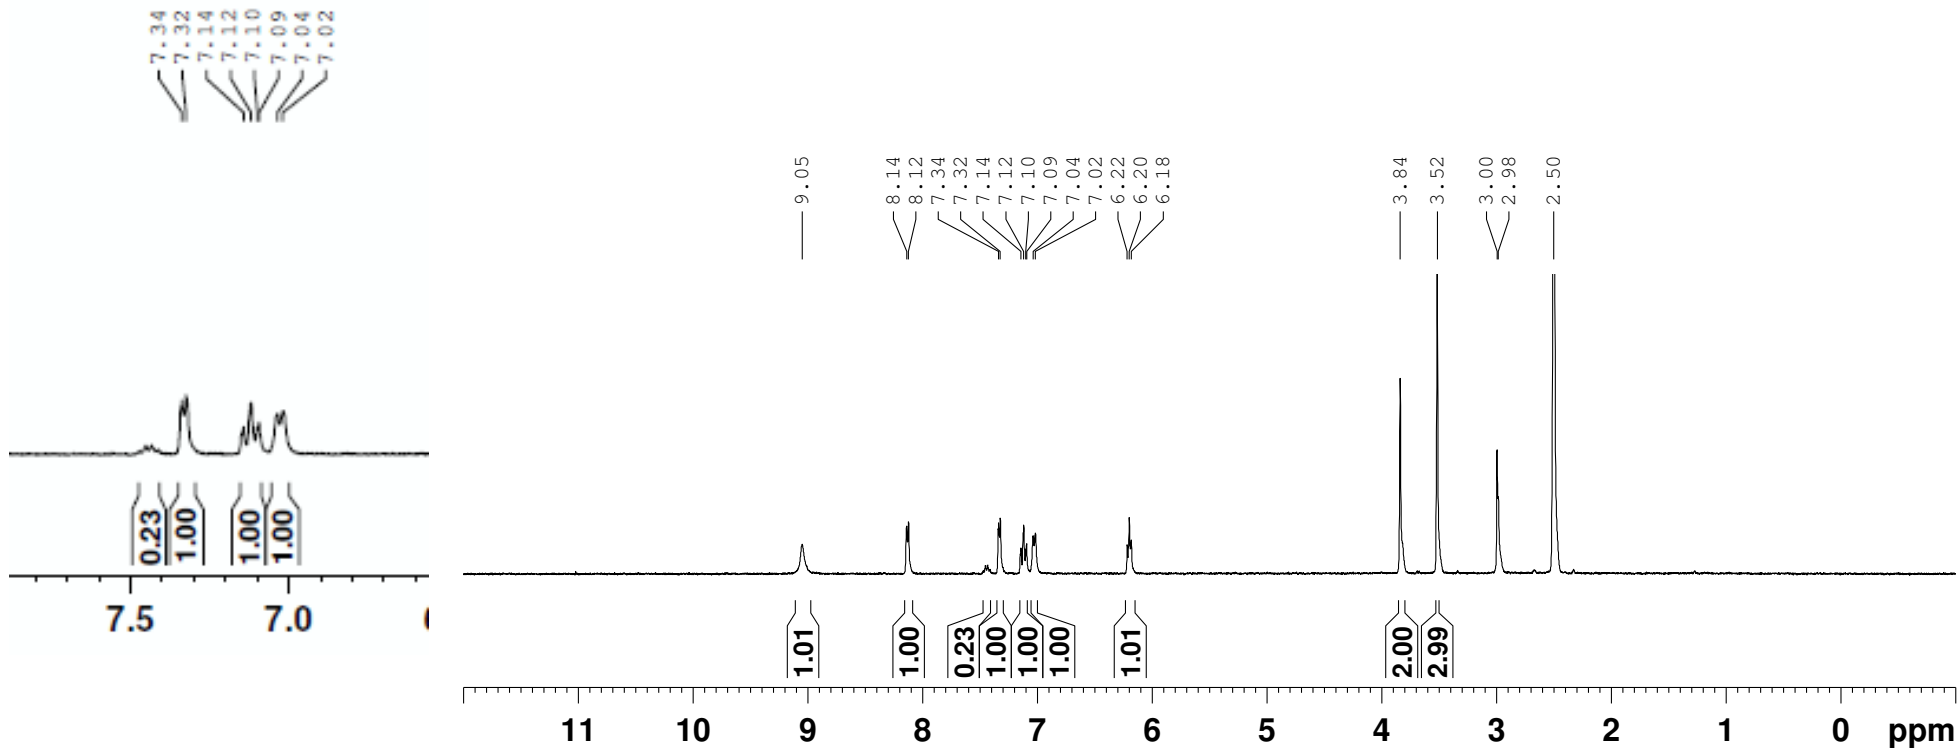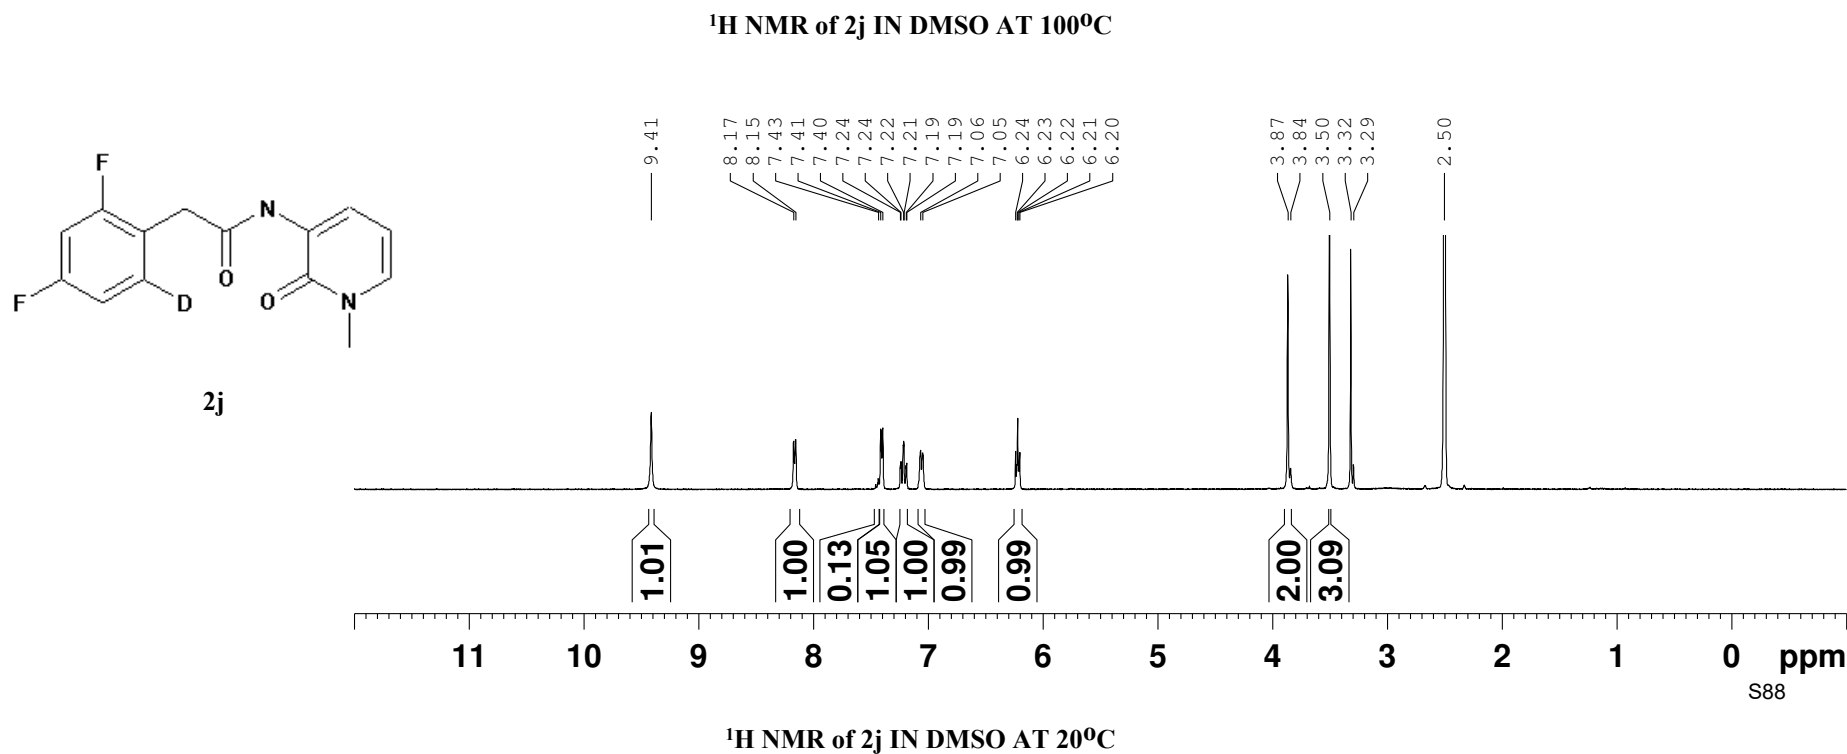



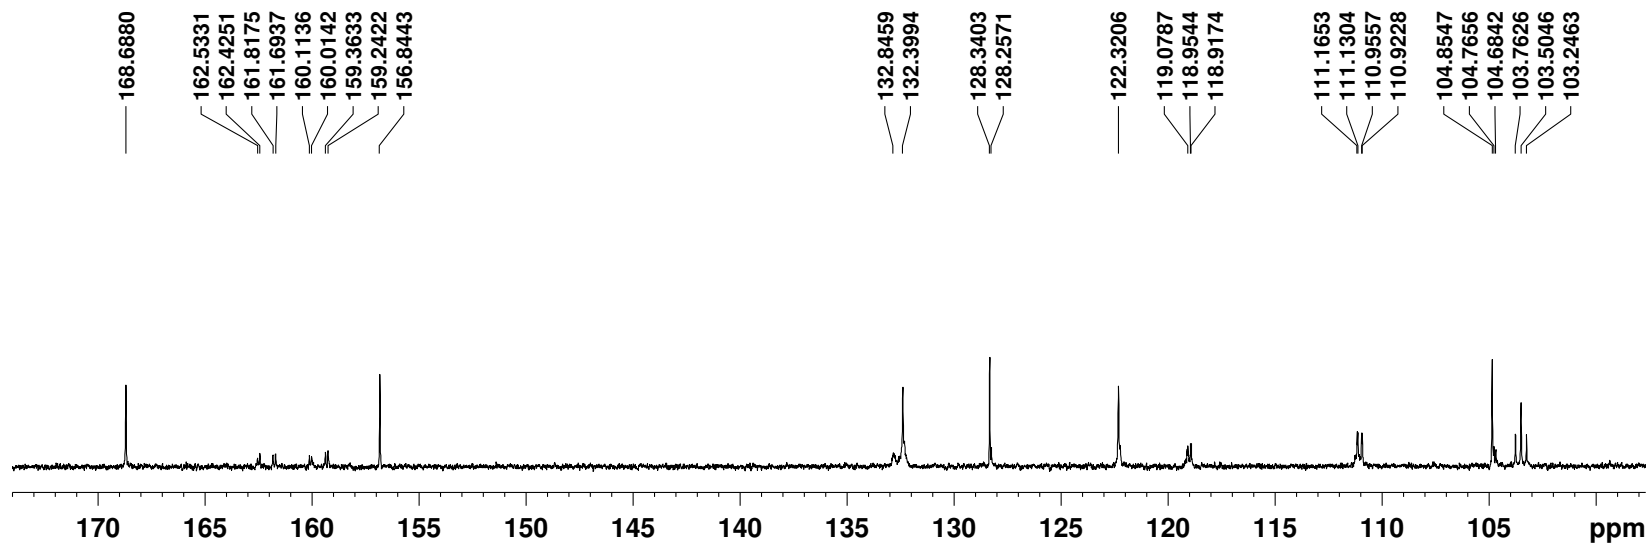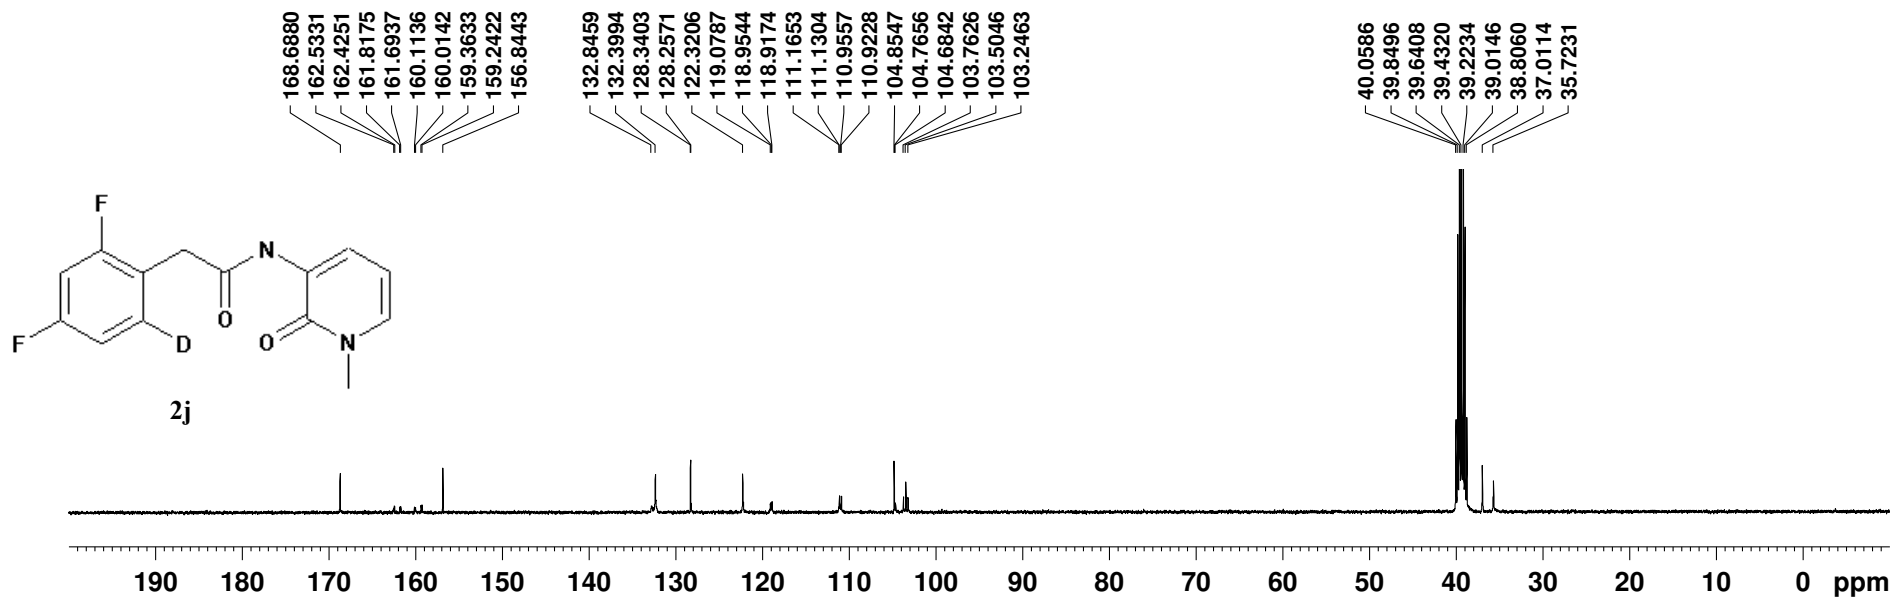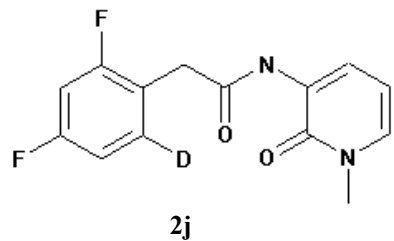

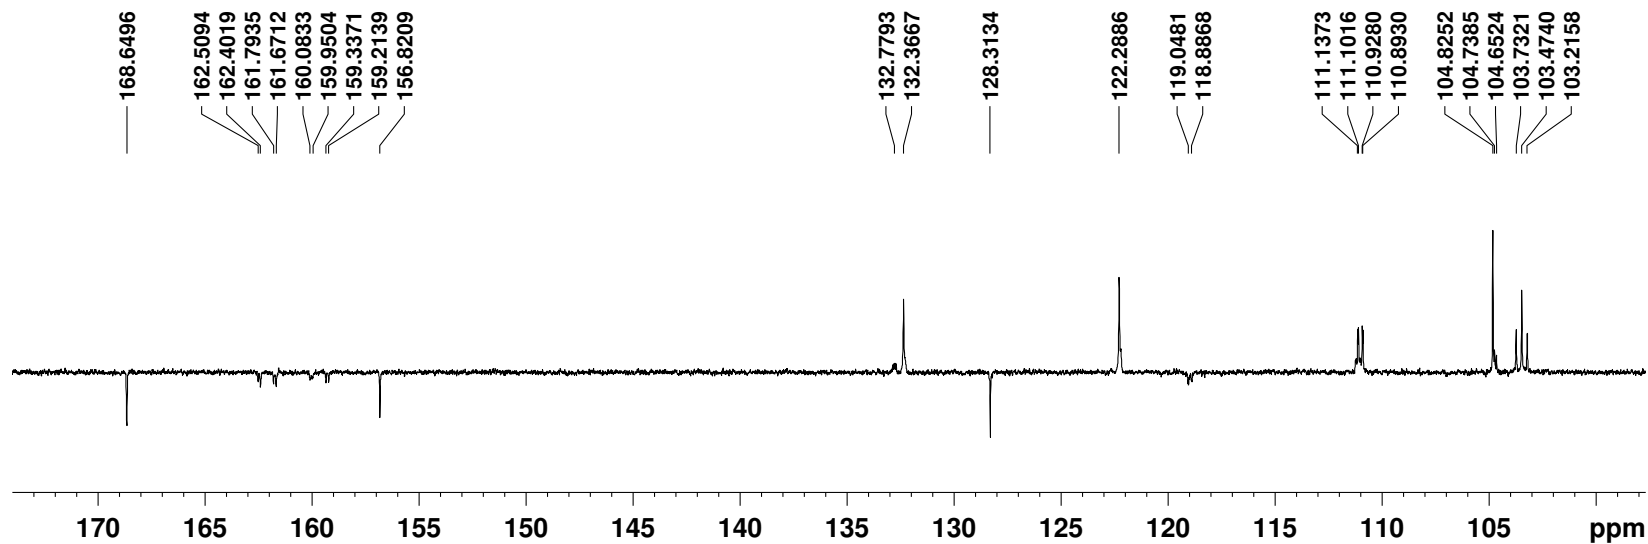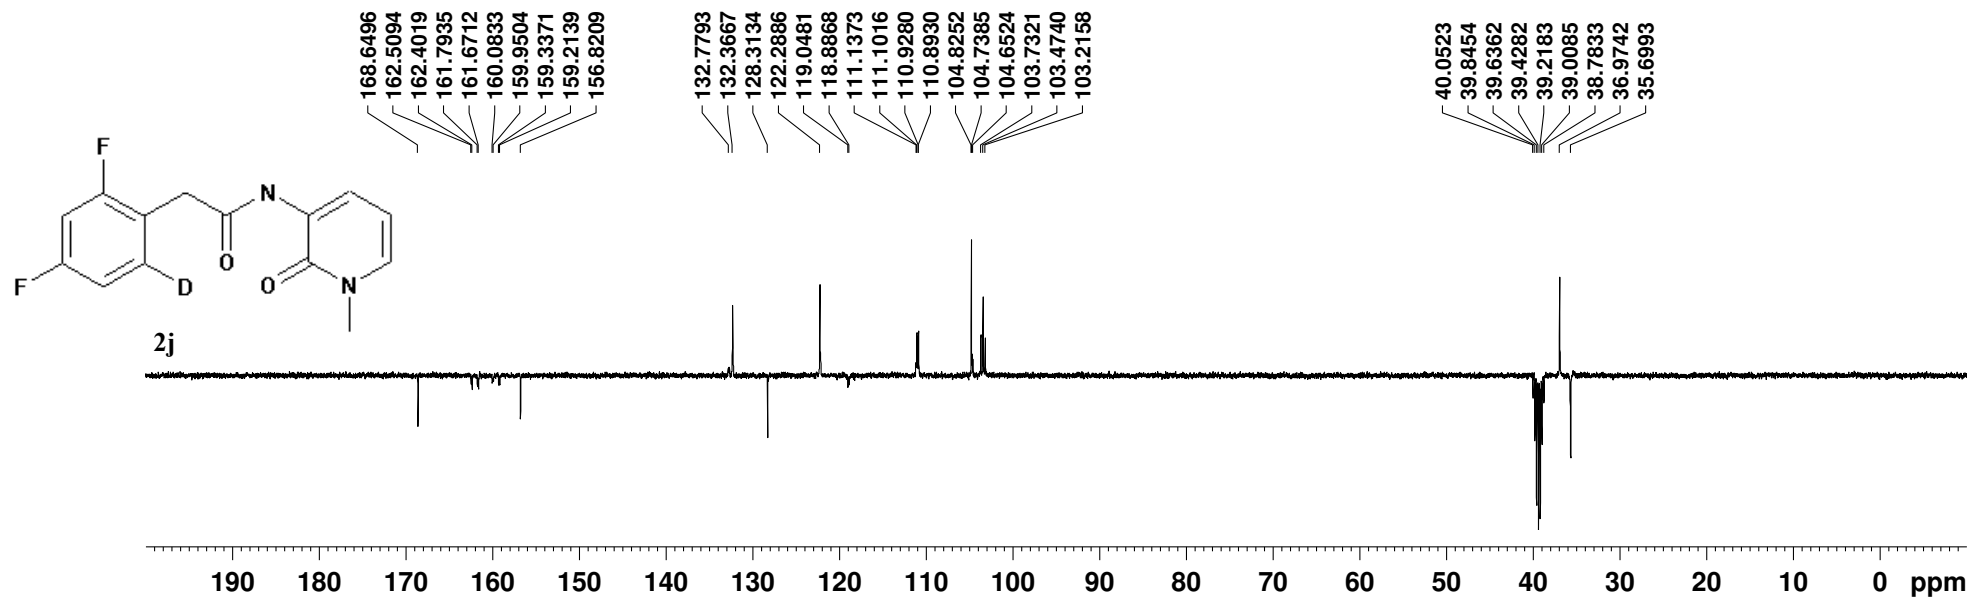

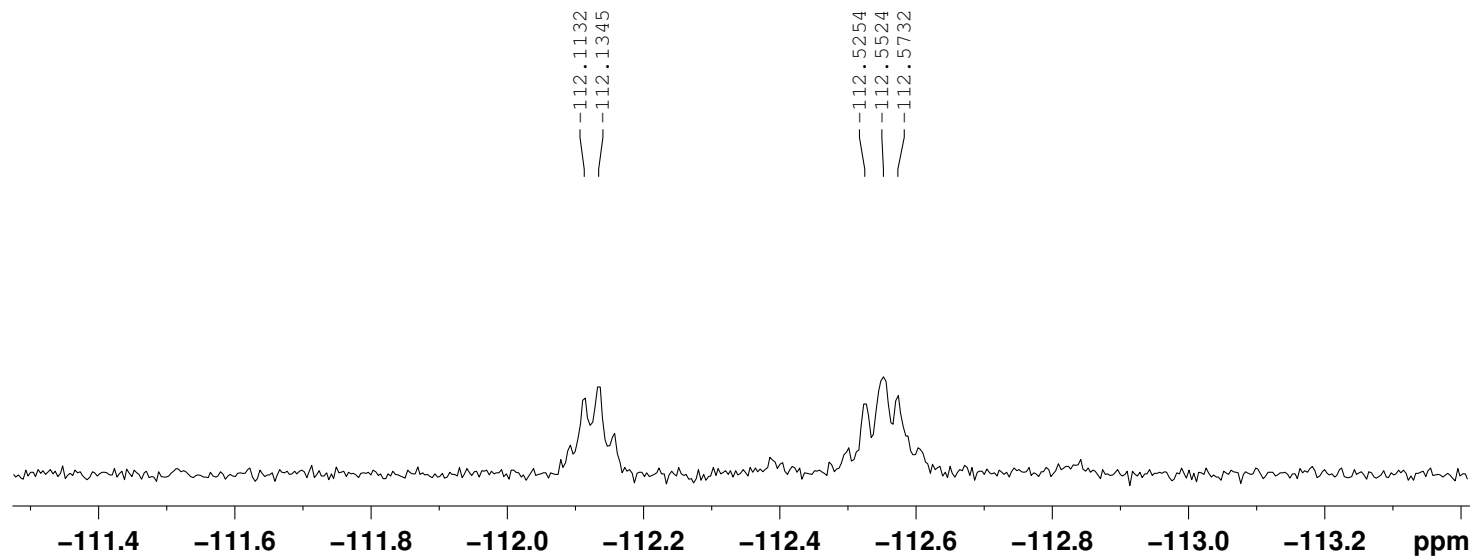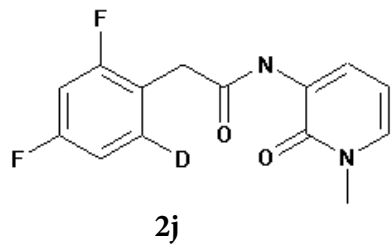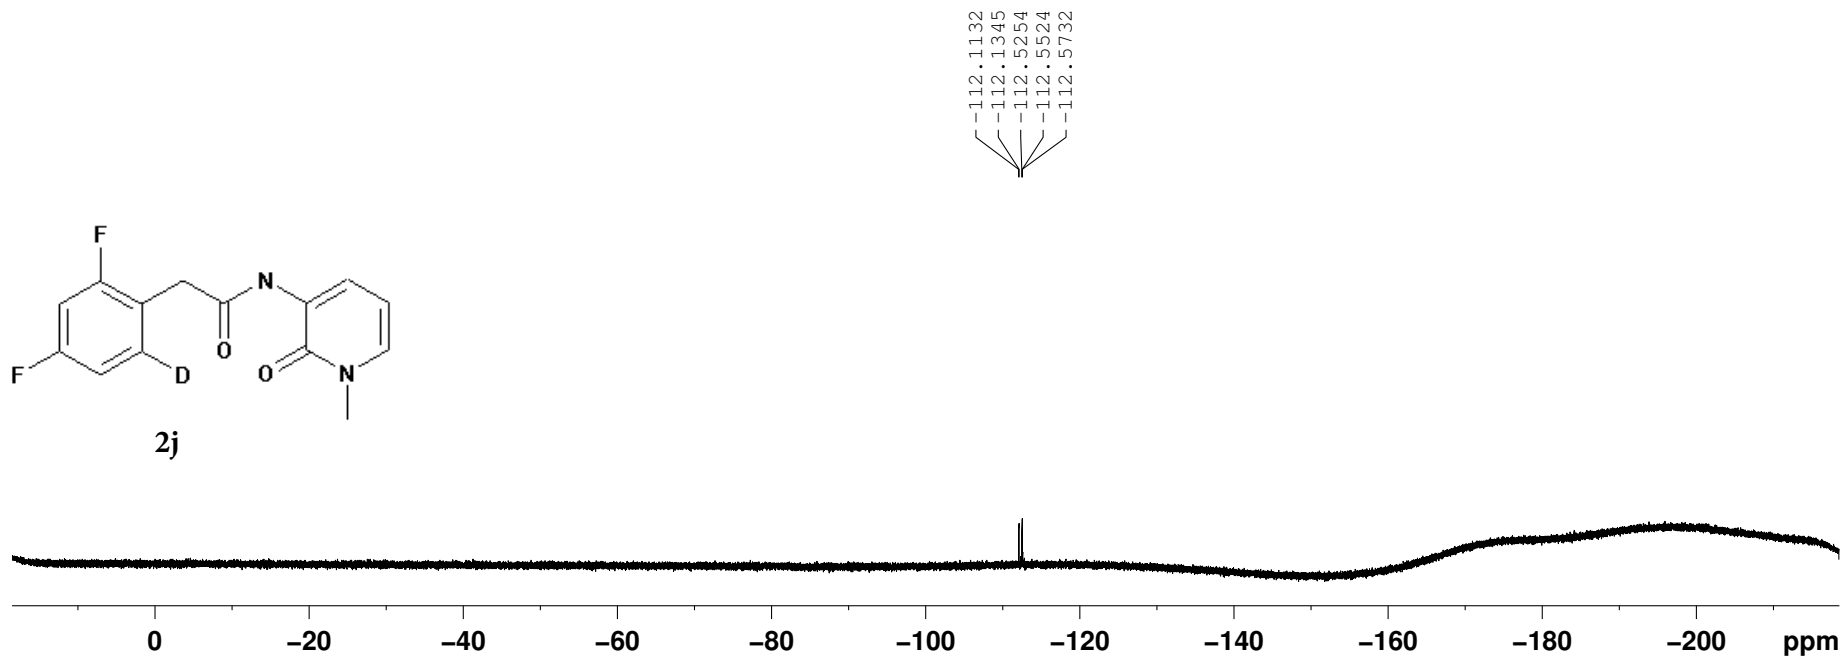

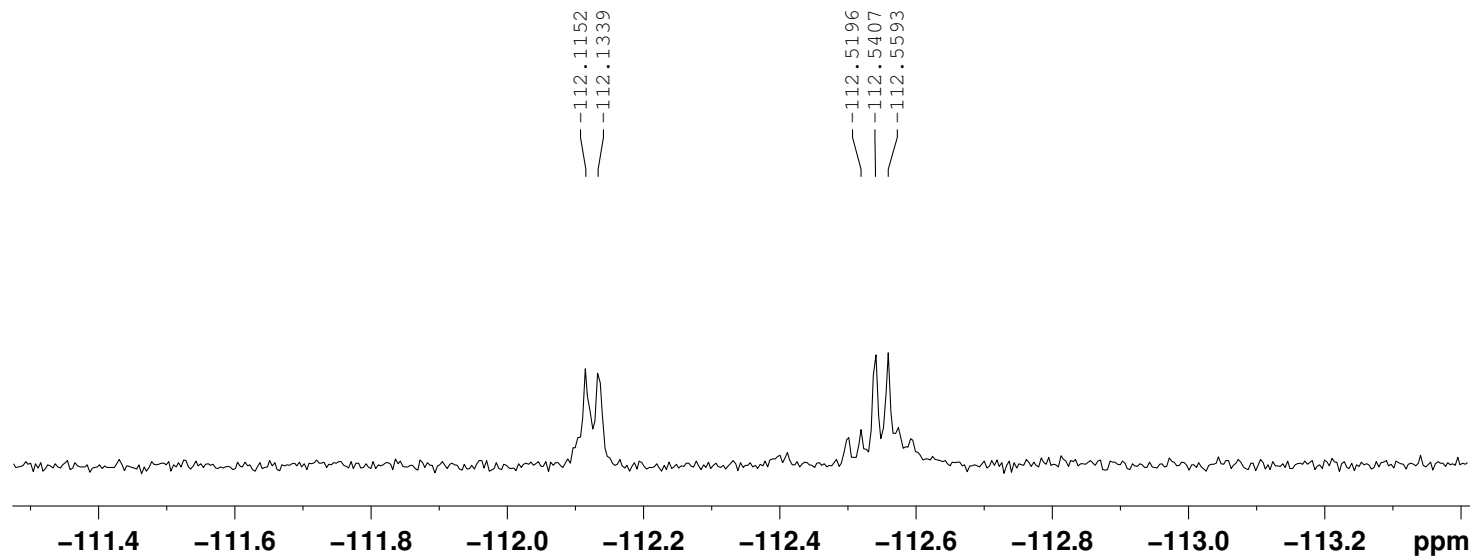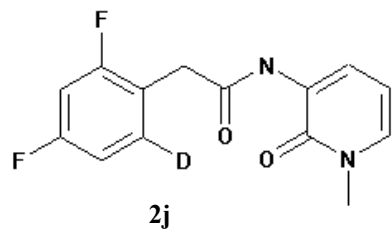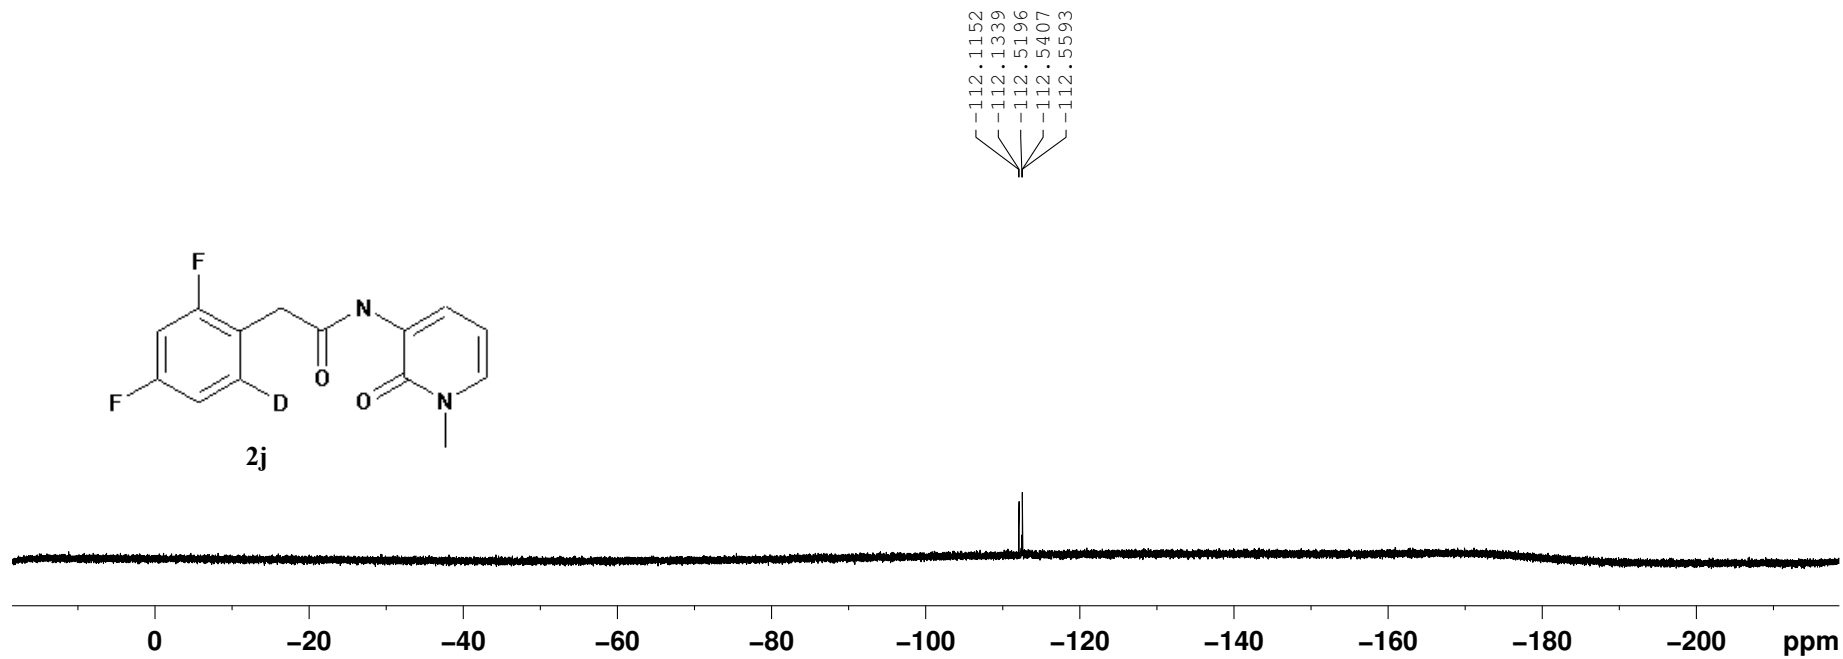

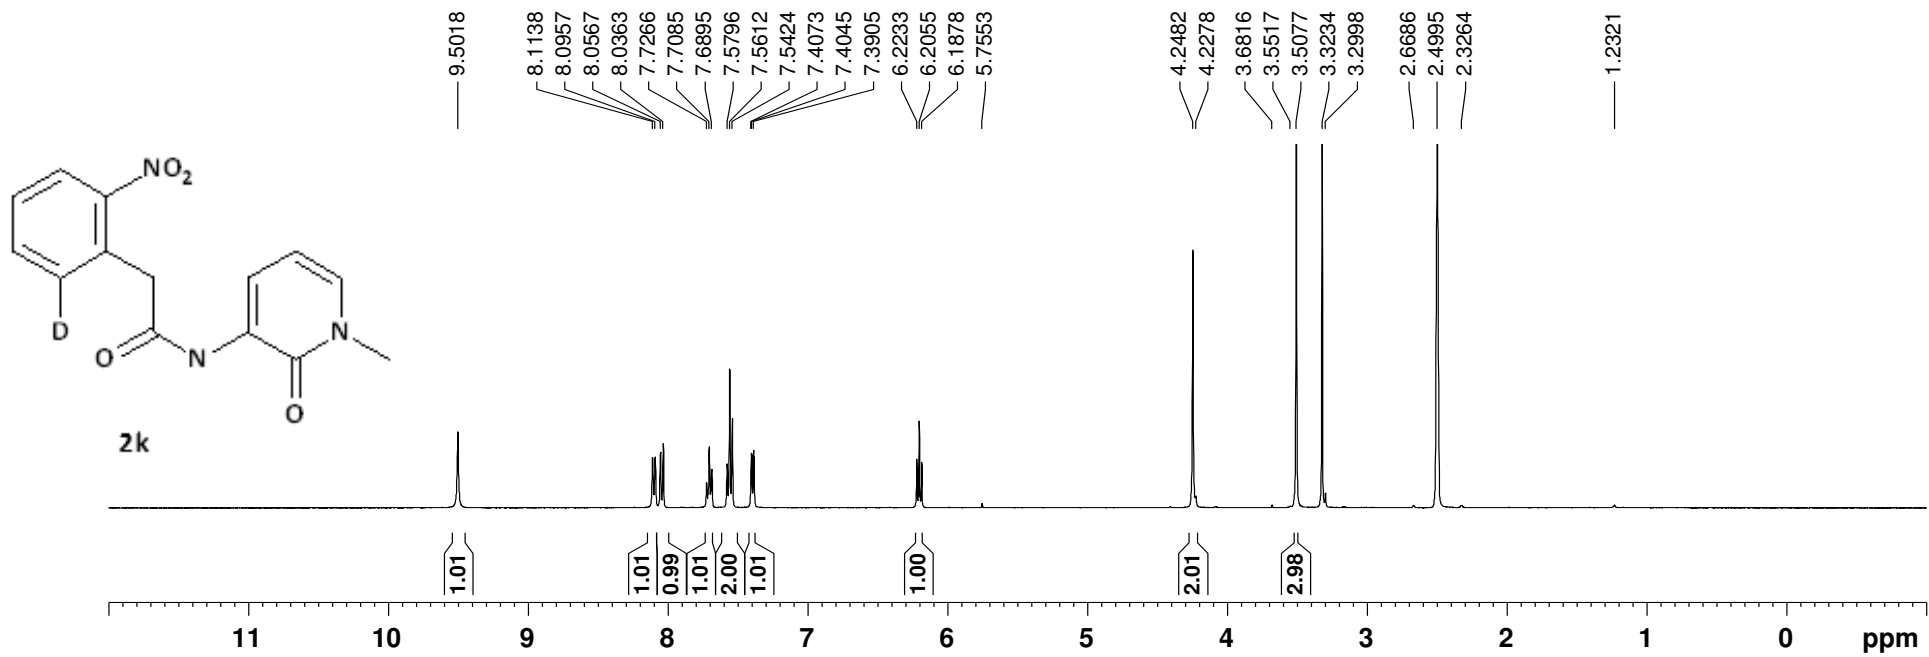

<sup>1</sup>H NMR of 2k IN DMSO No Deuterium incorporation

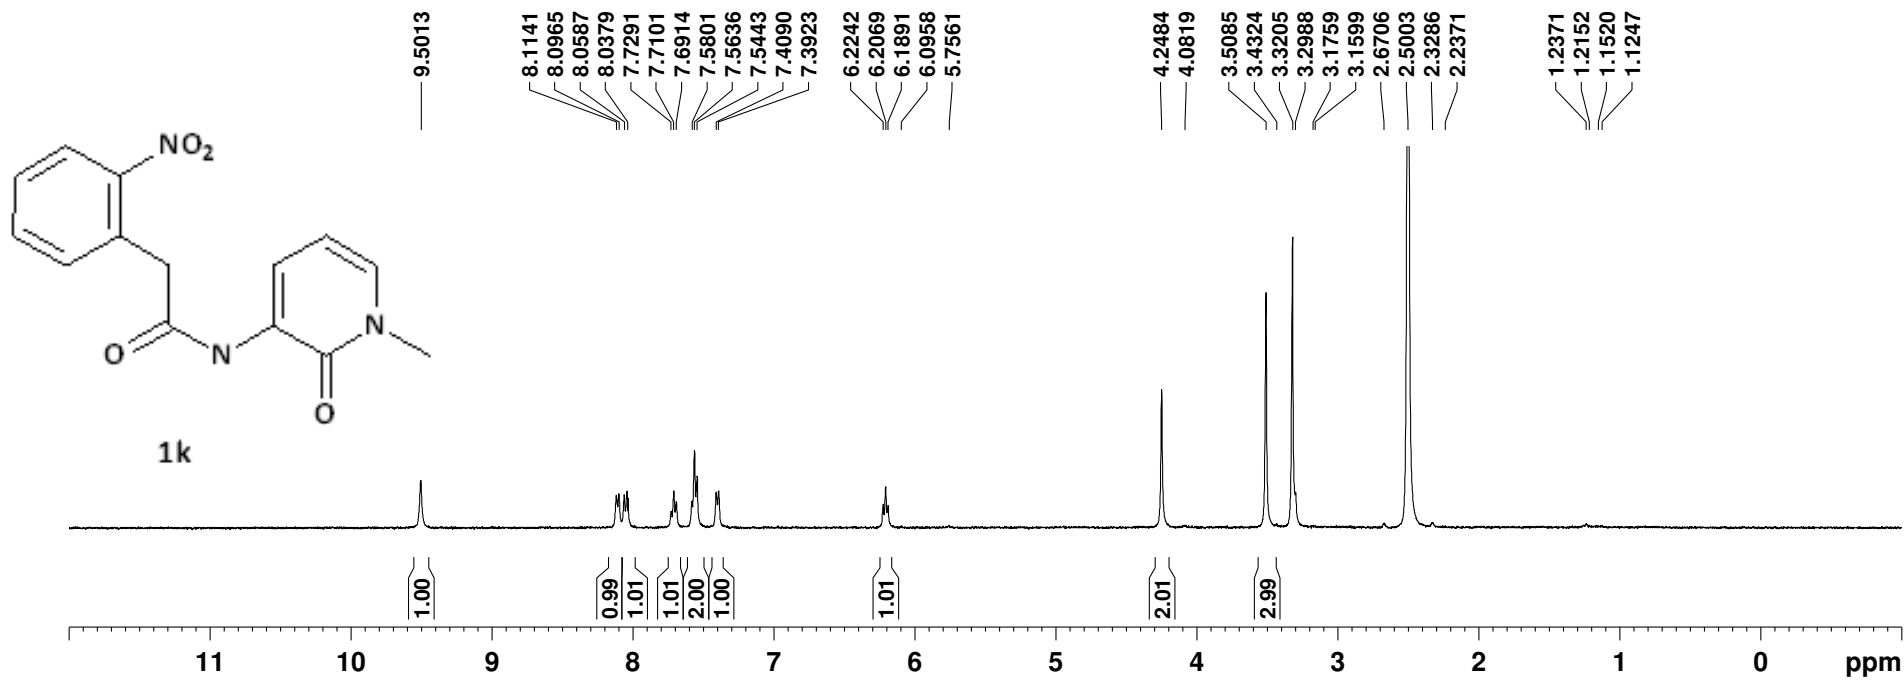

<sup>1</sup>H NMR of 1k IN DMSO

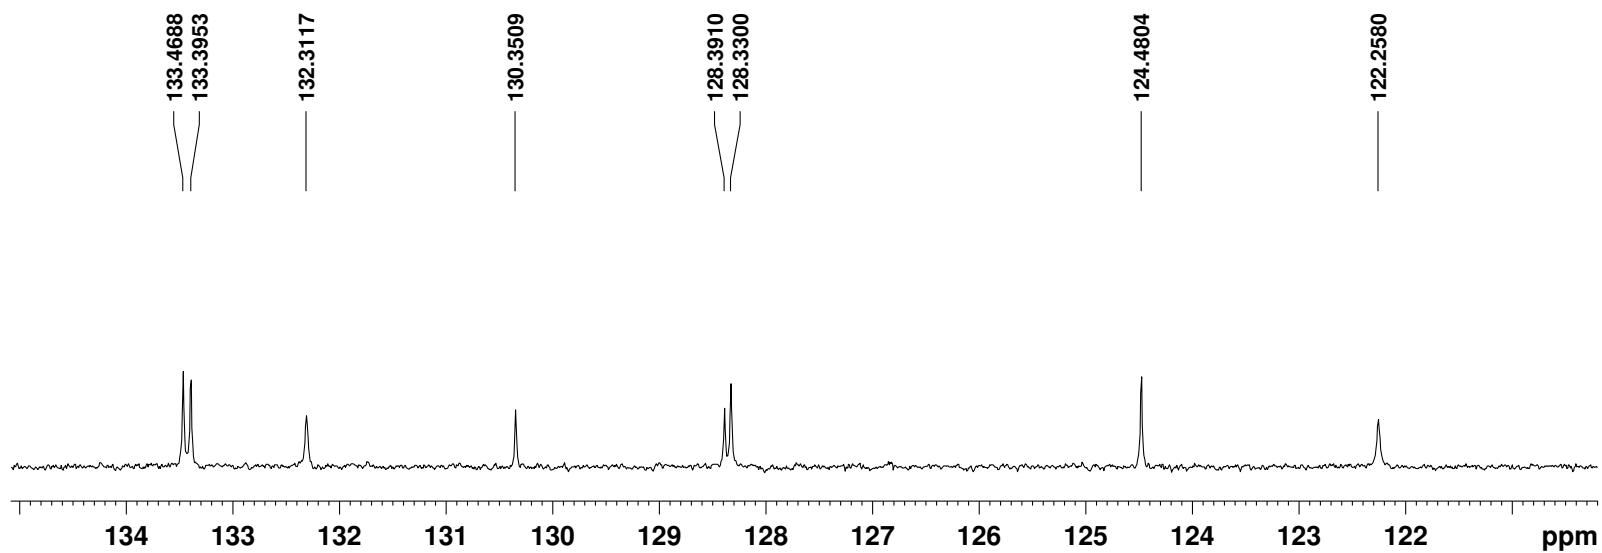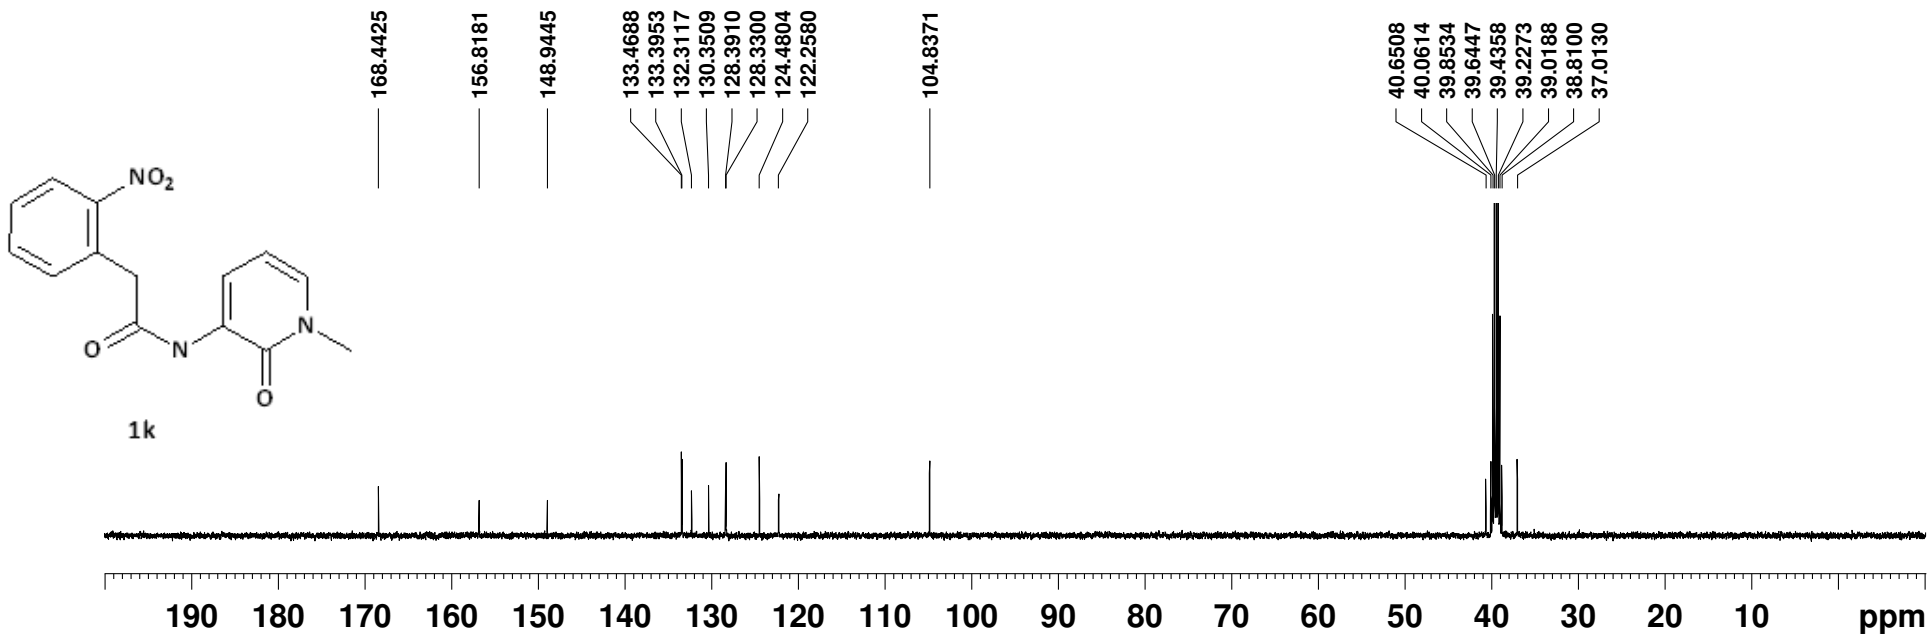

<sup>13</sup>C NMR of 1k IN DMSO

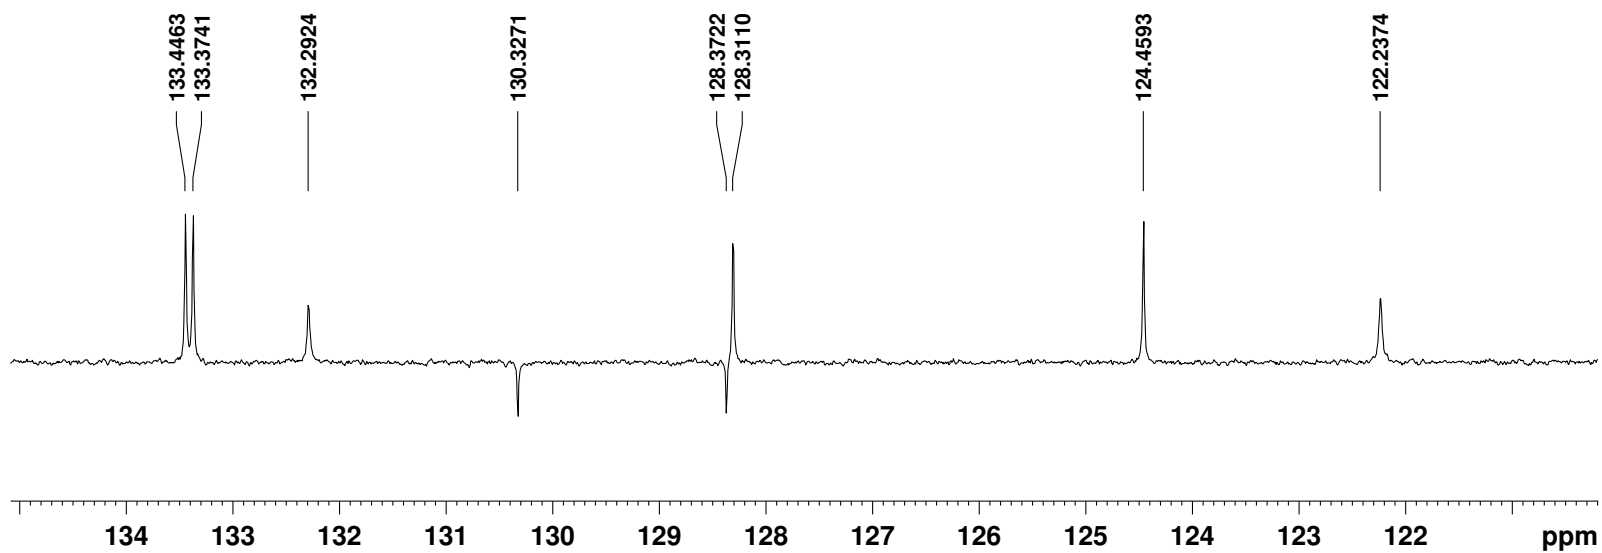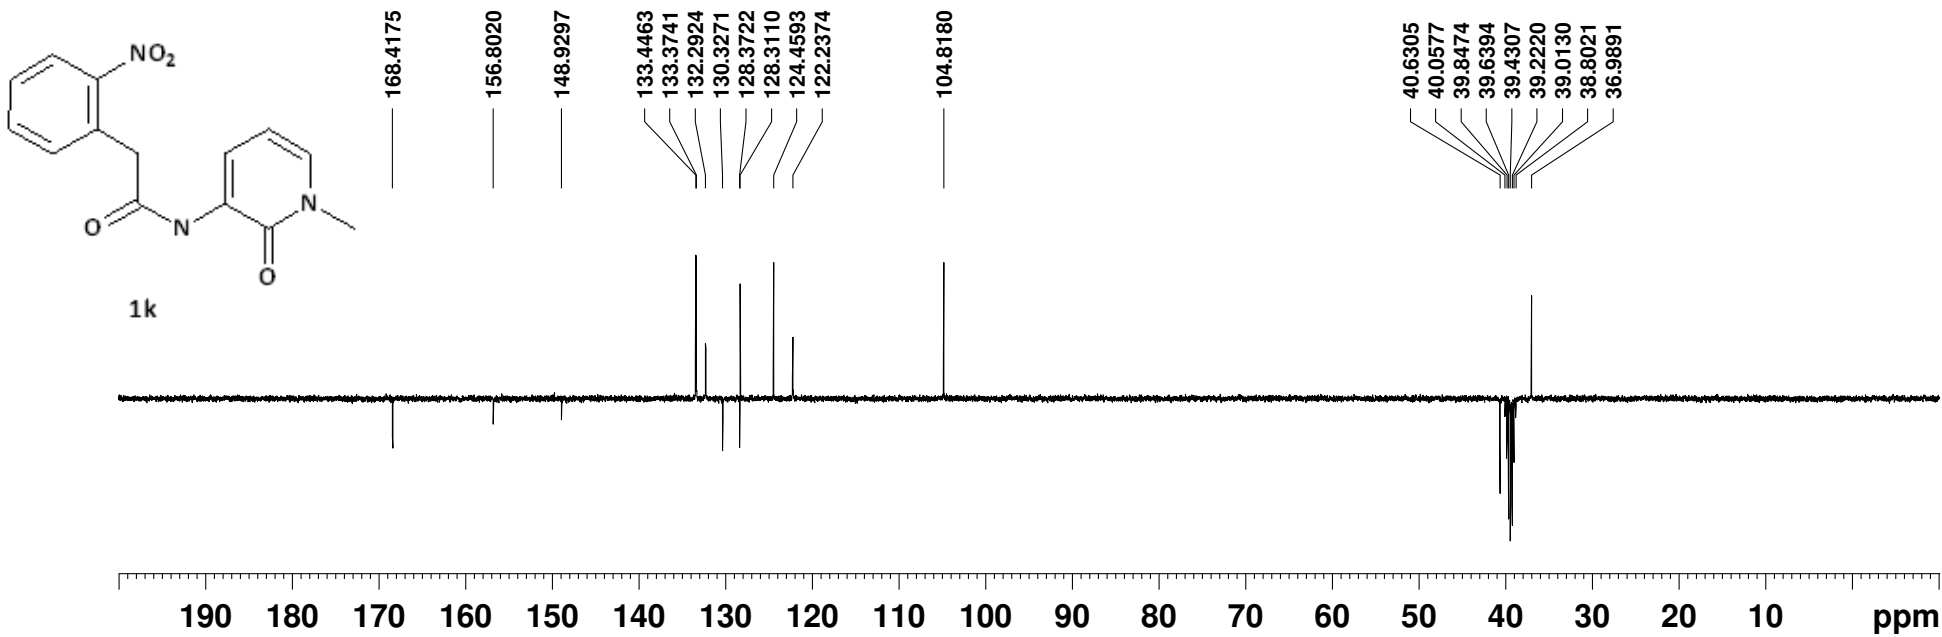

APT of 1k IN DMSO

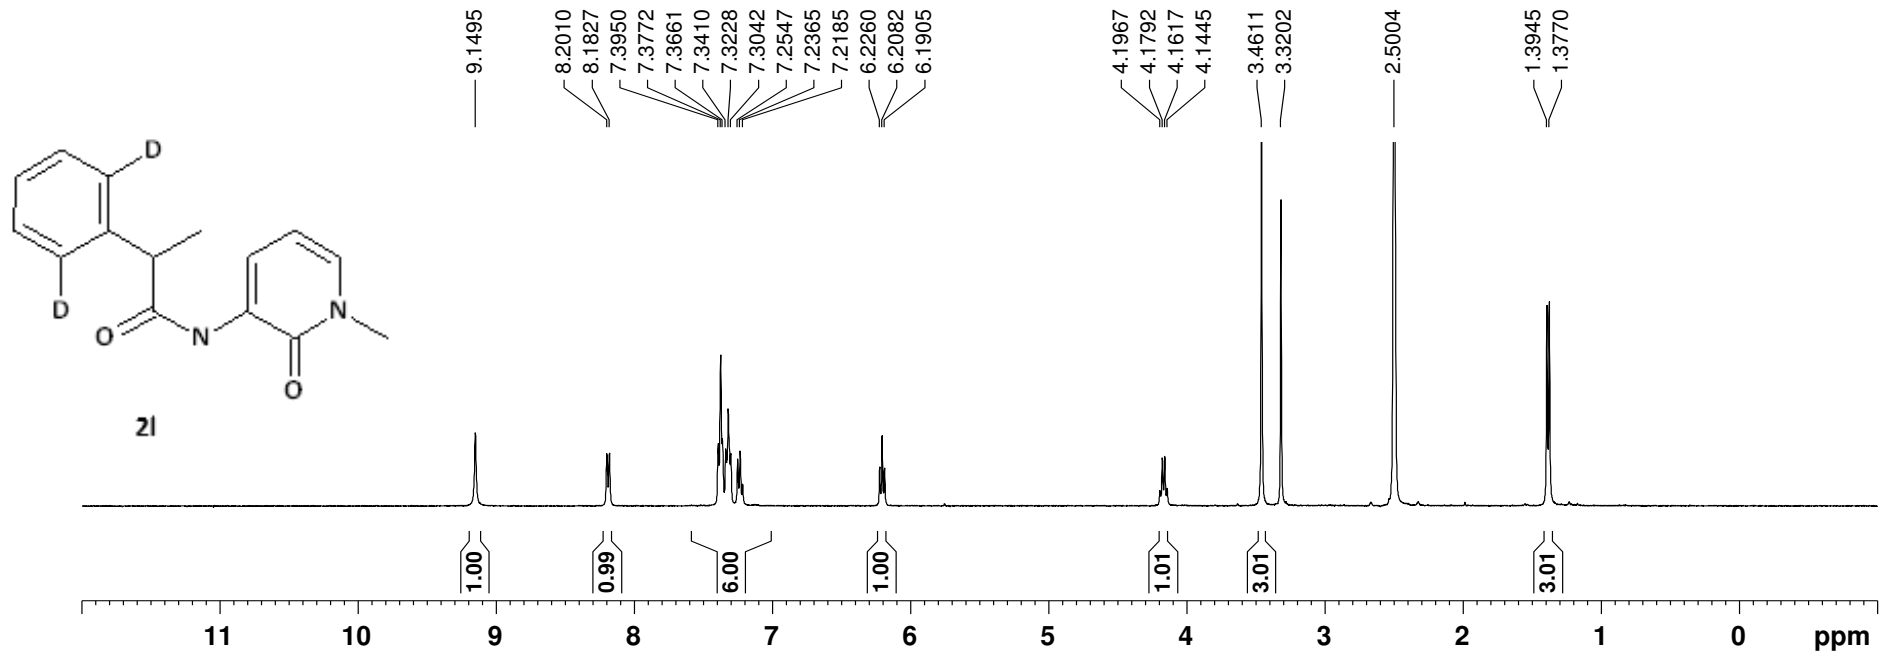

<sup>1</sup>H NMR of 21 IN DMSO No deuterium incorporation

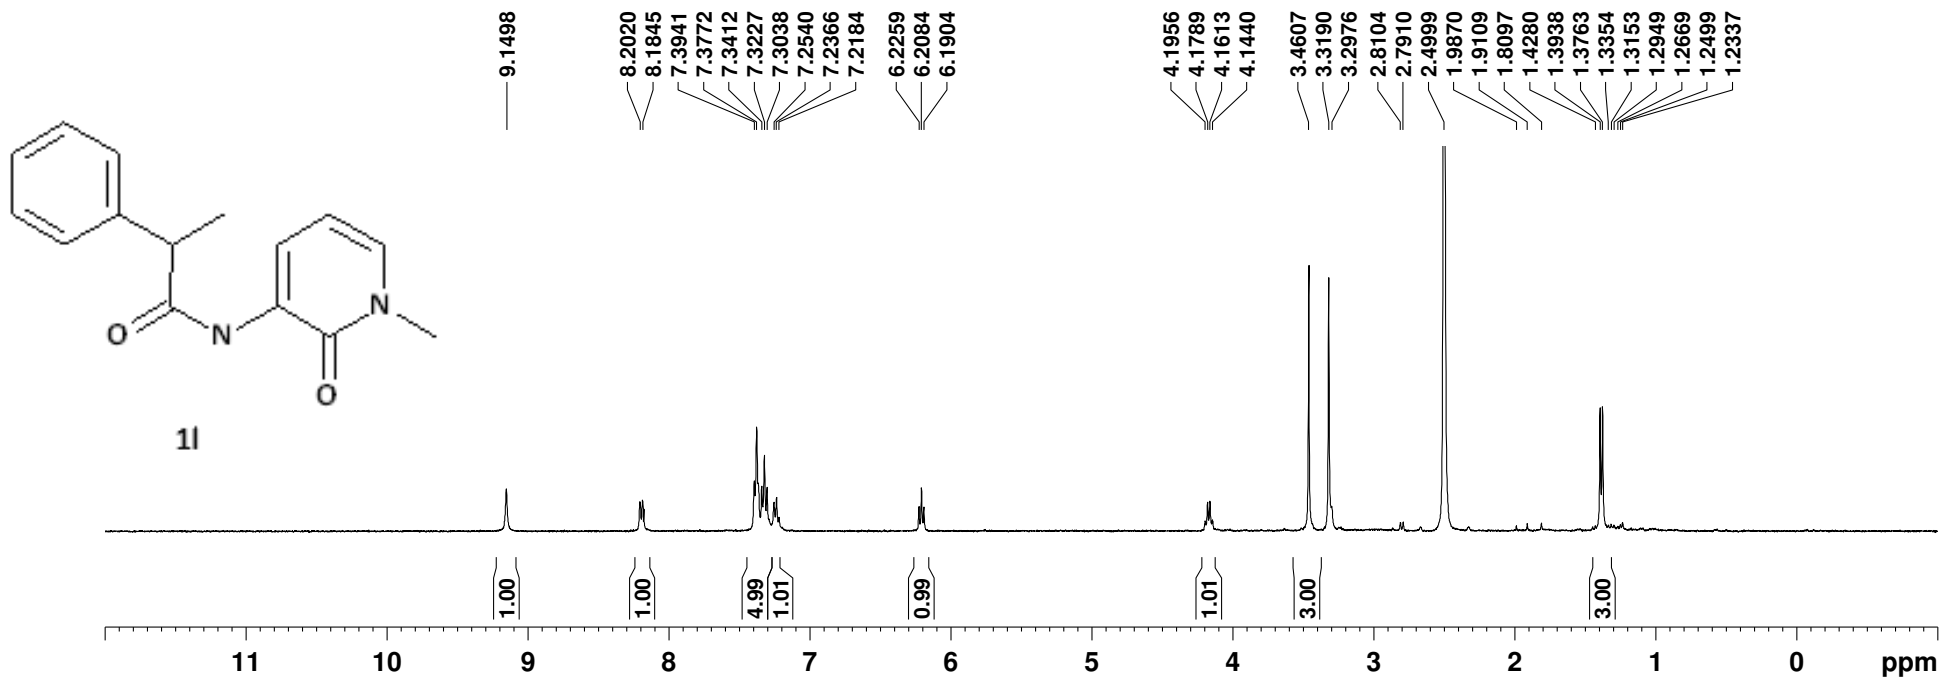

<sup>1</sup>H NMR of 11 IN DMSO



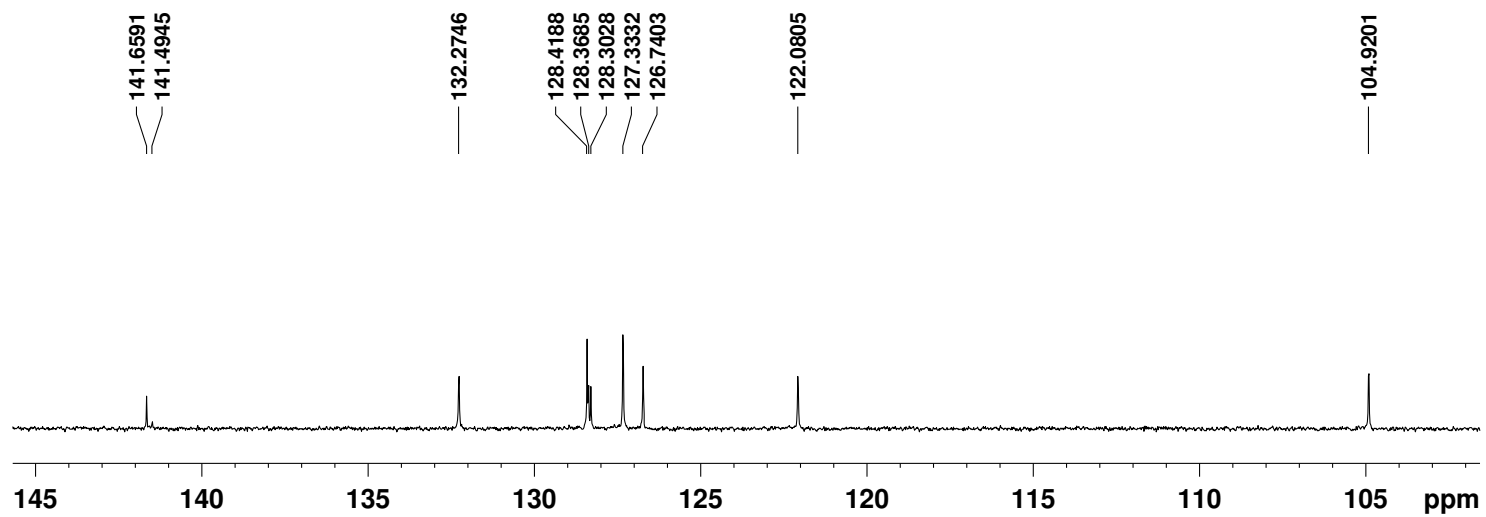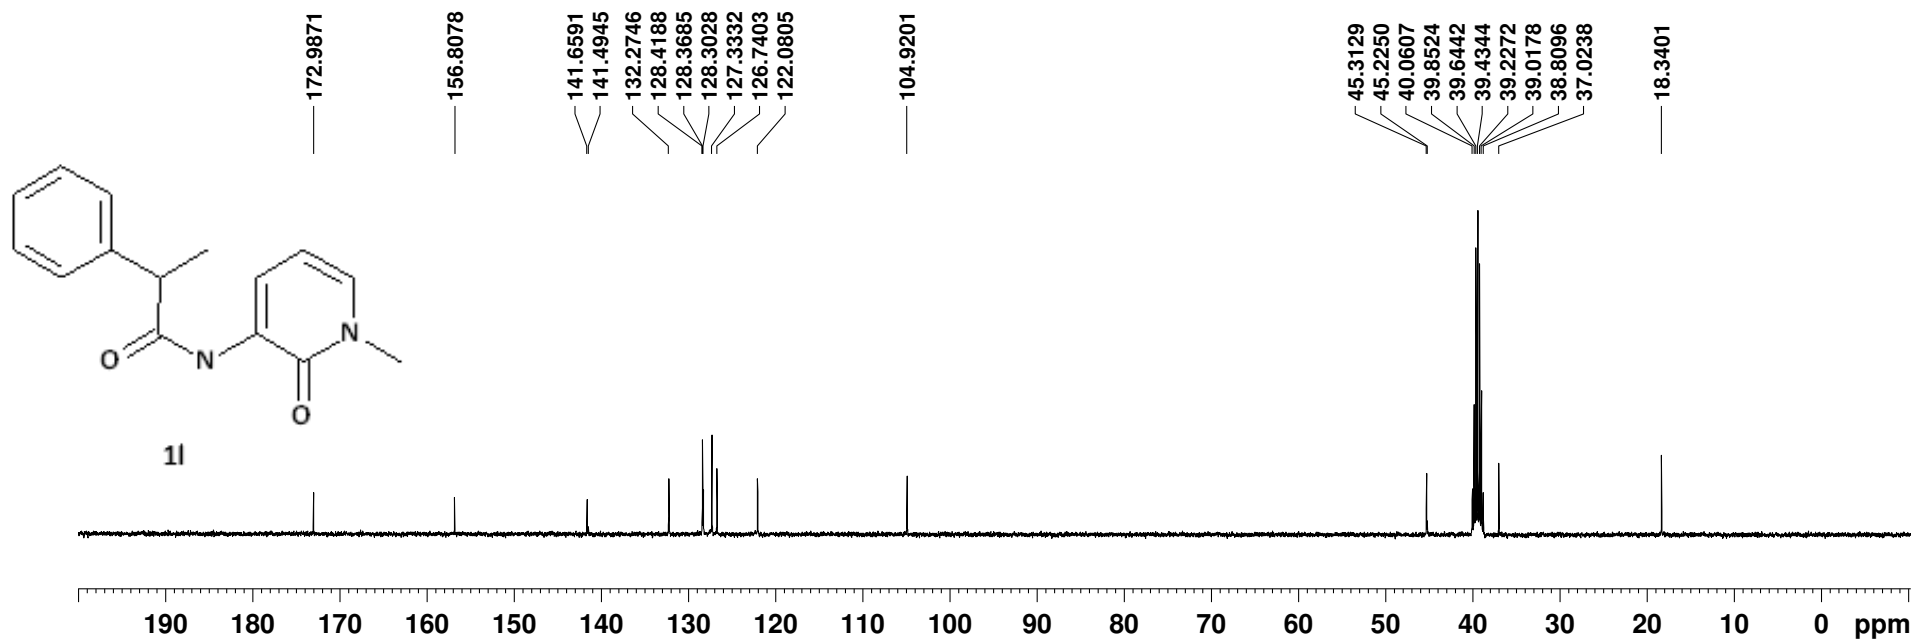

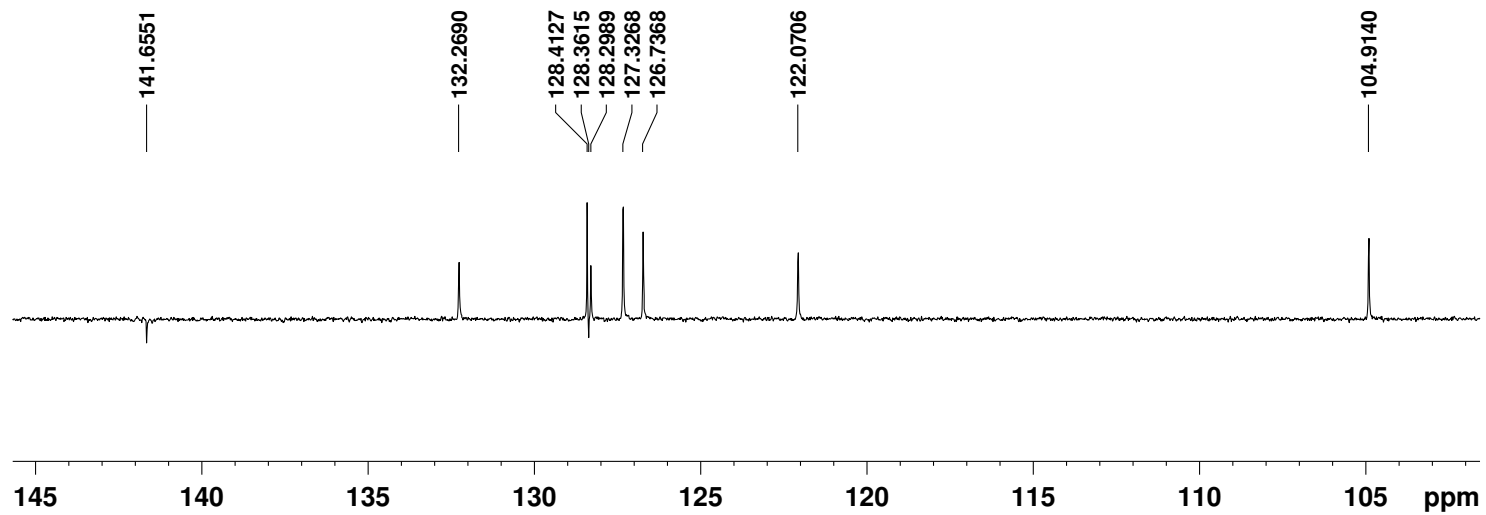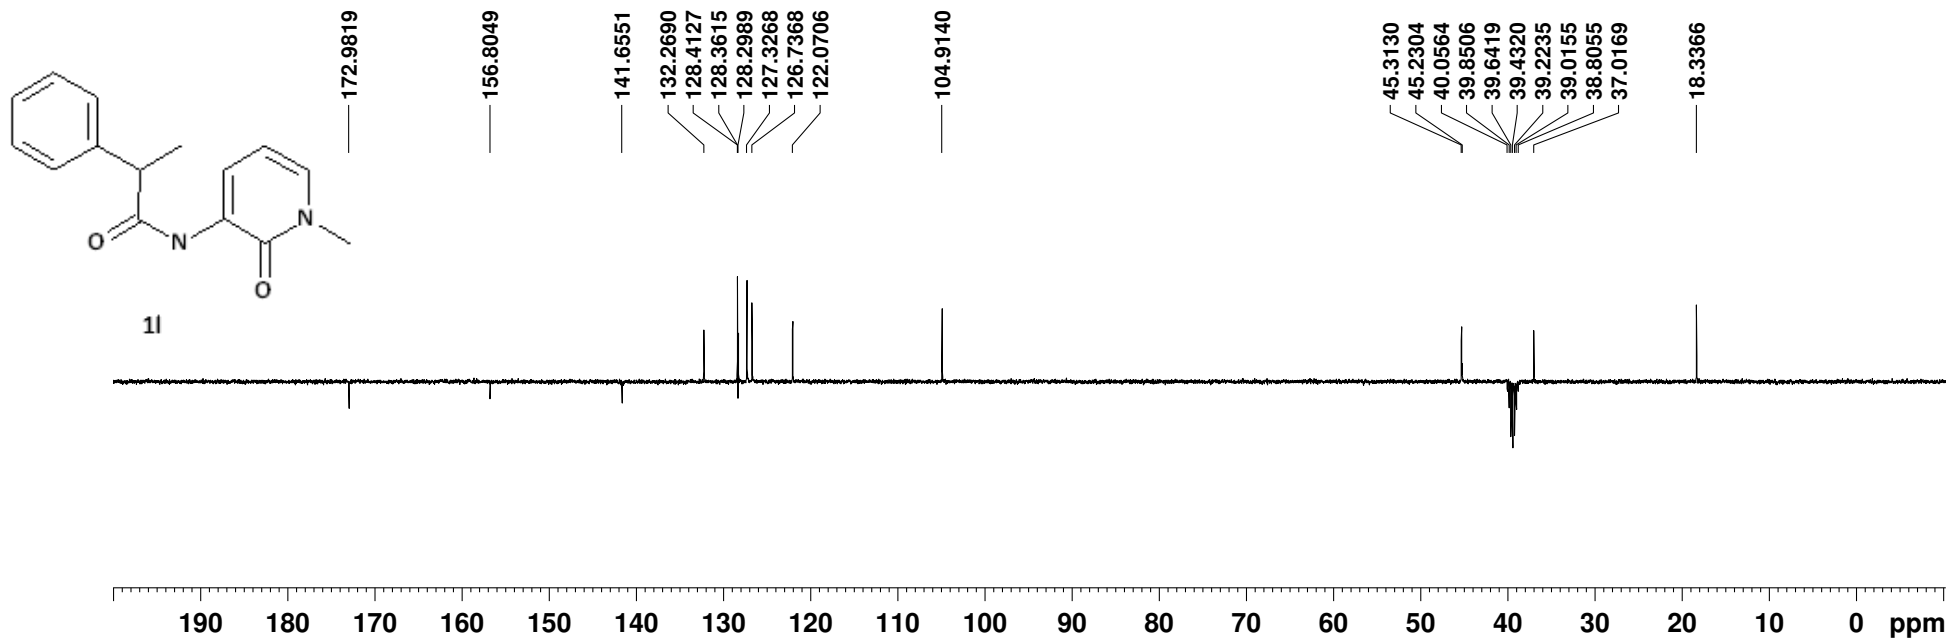

APT of 11 IN DMSO

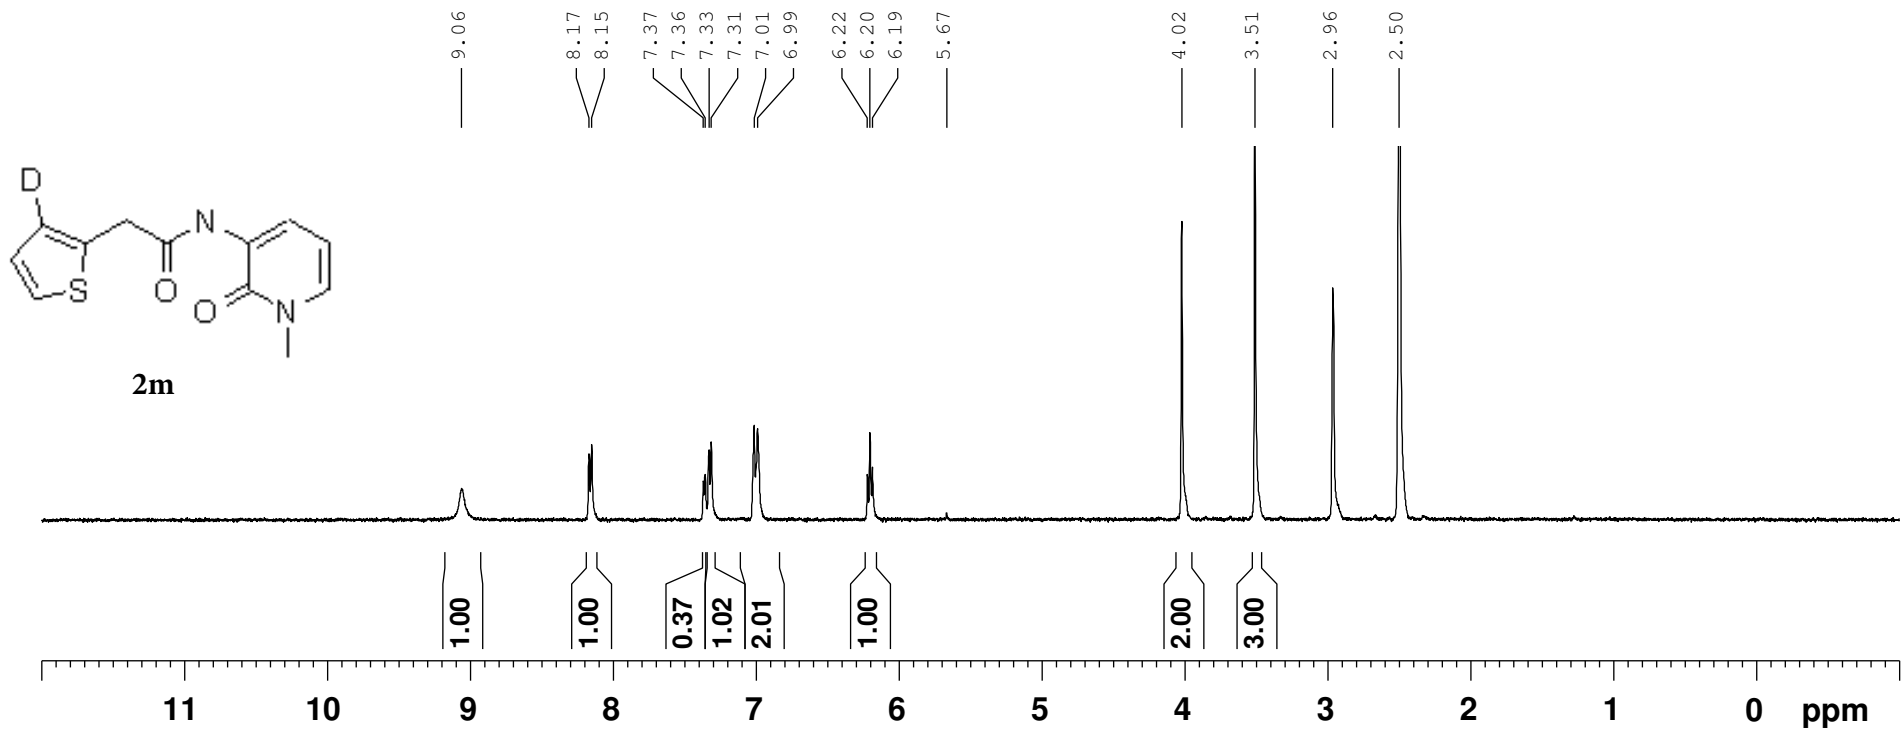

<sup>1</sup>H NMR of 2m IN DMSO AT 100°C

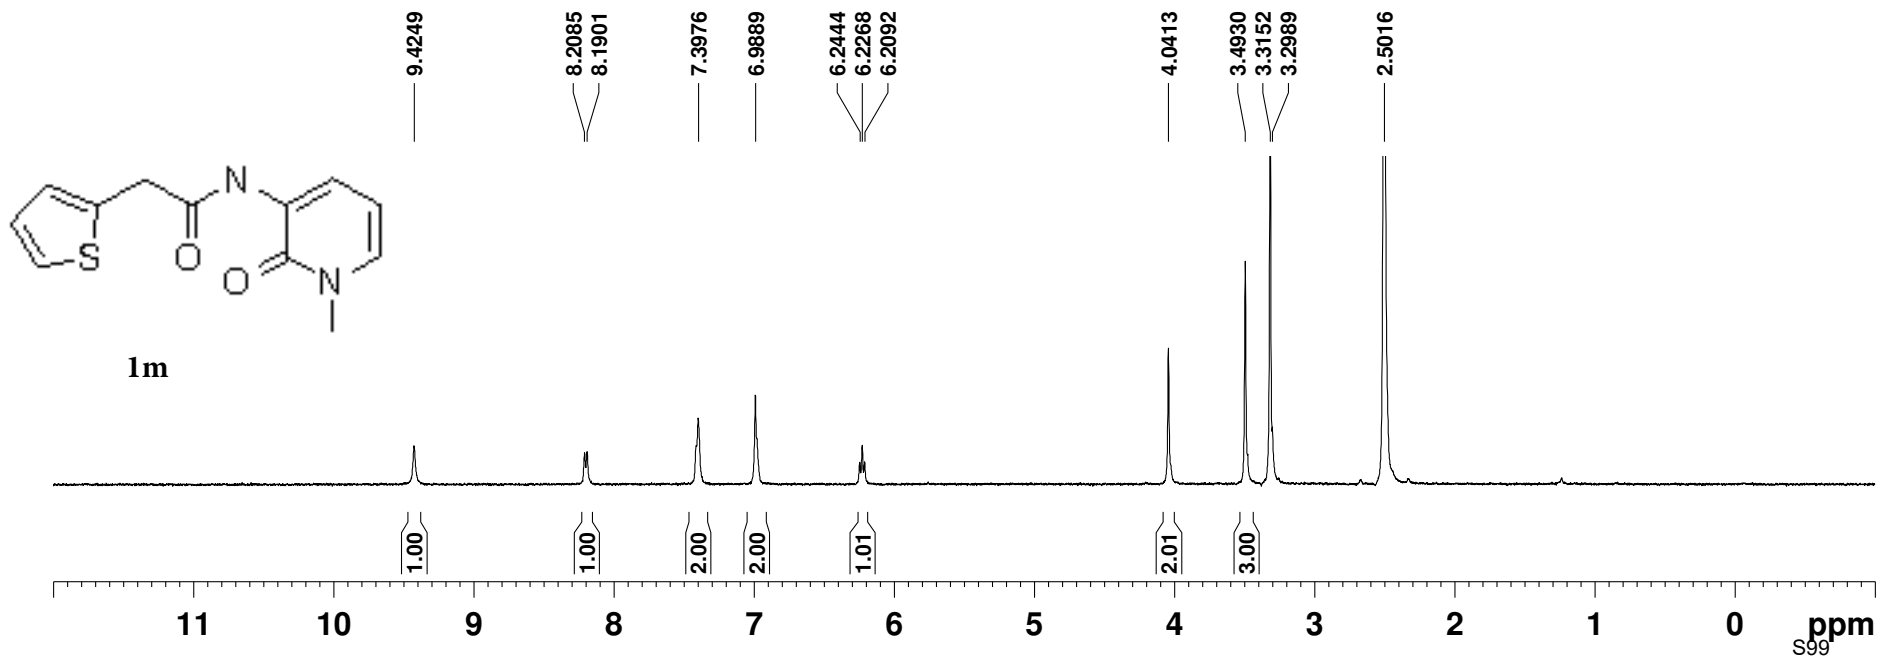

<sup>1</sup>H NMR of 1m IN DMSO AT 20°C

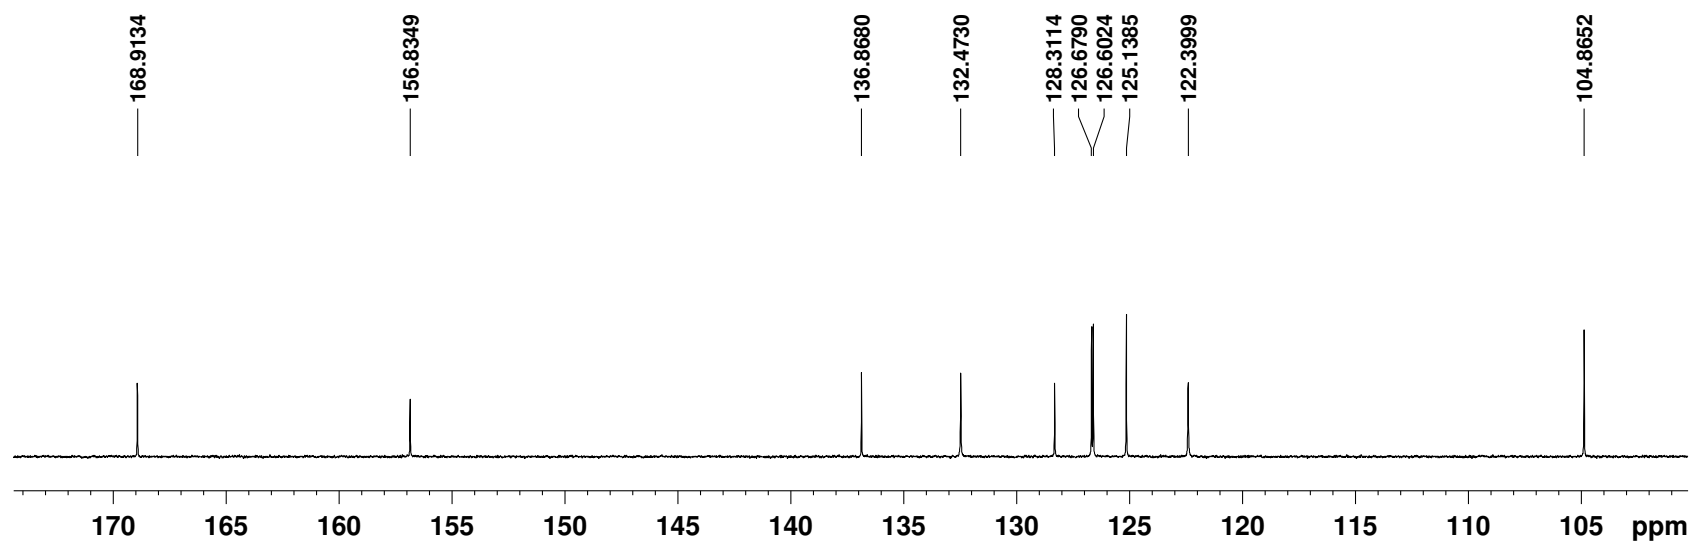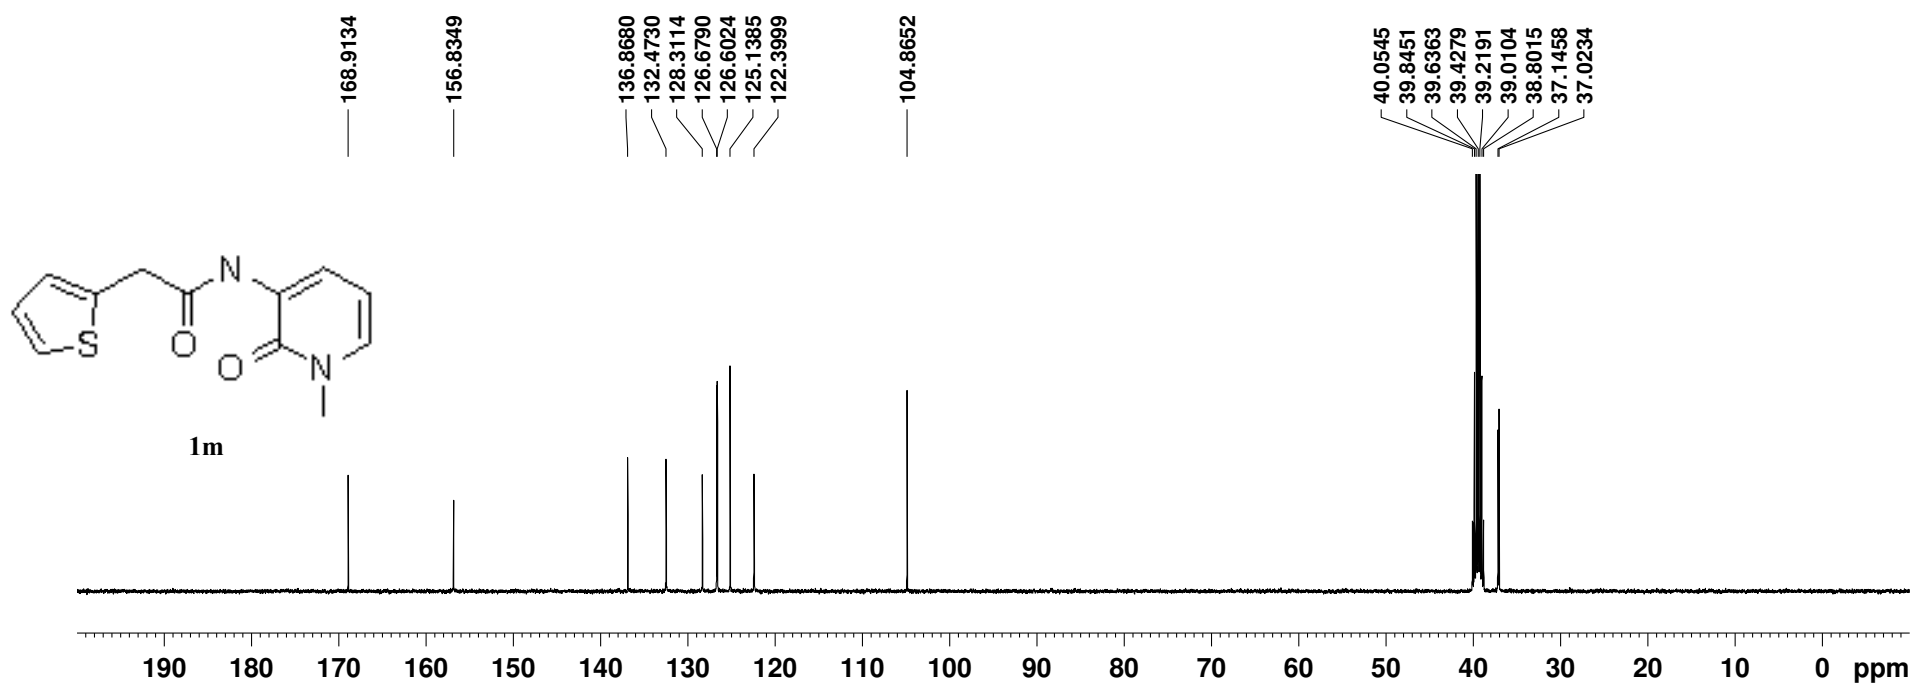

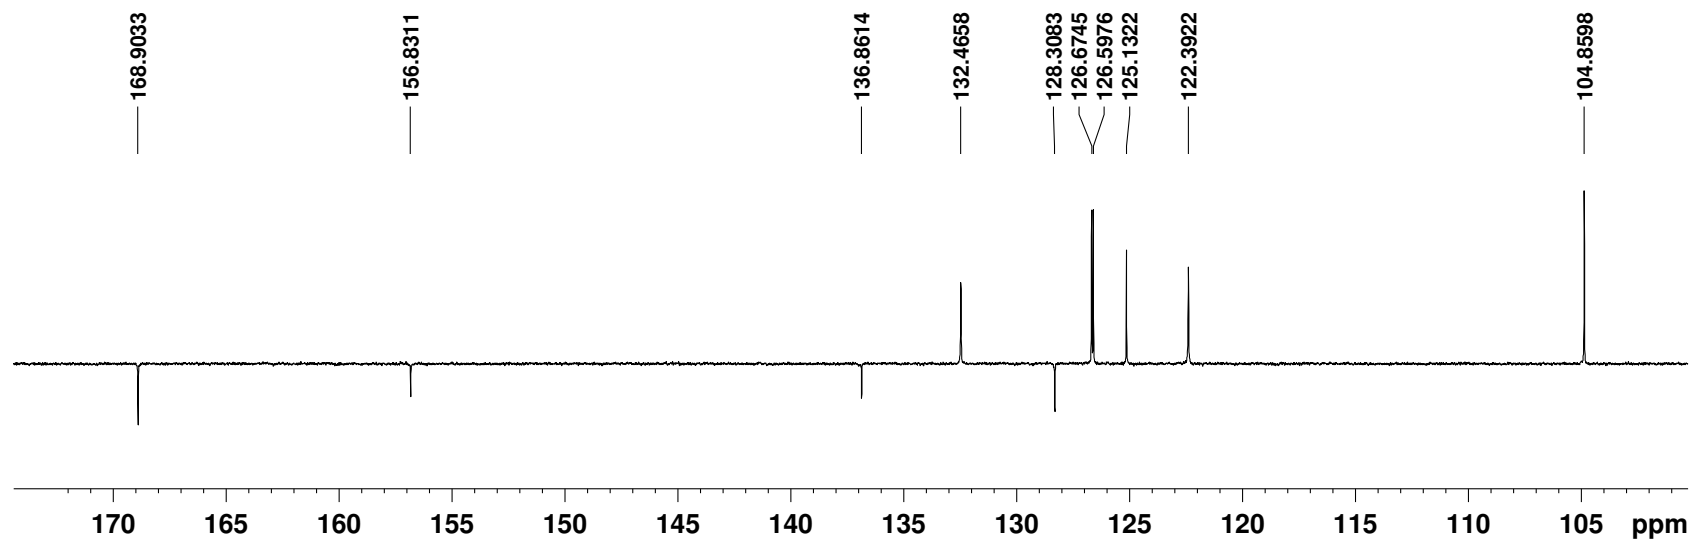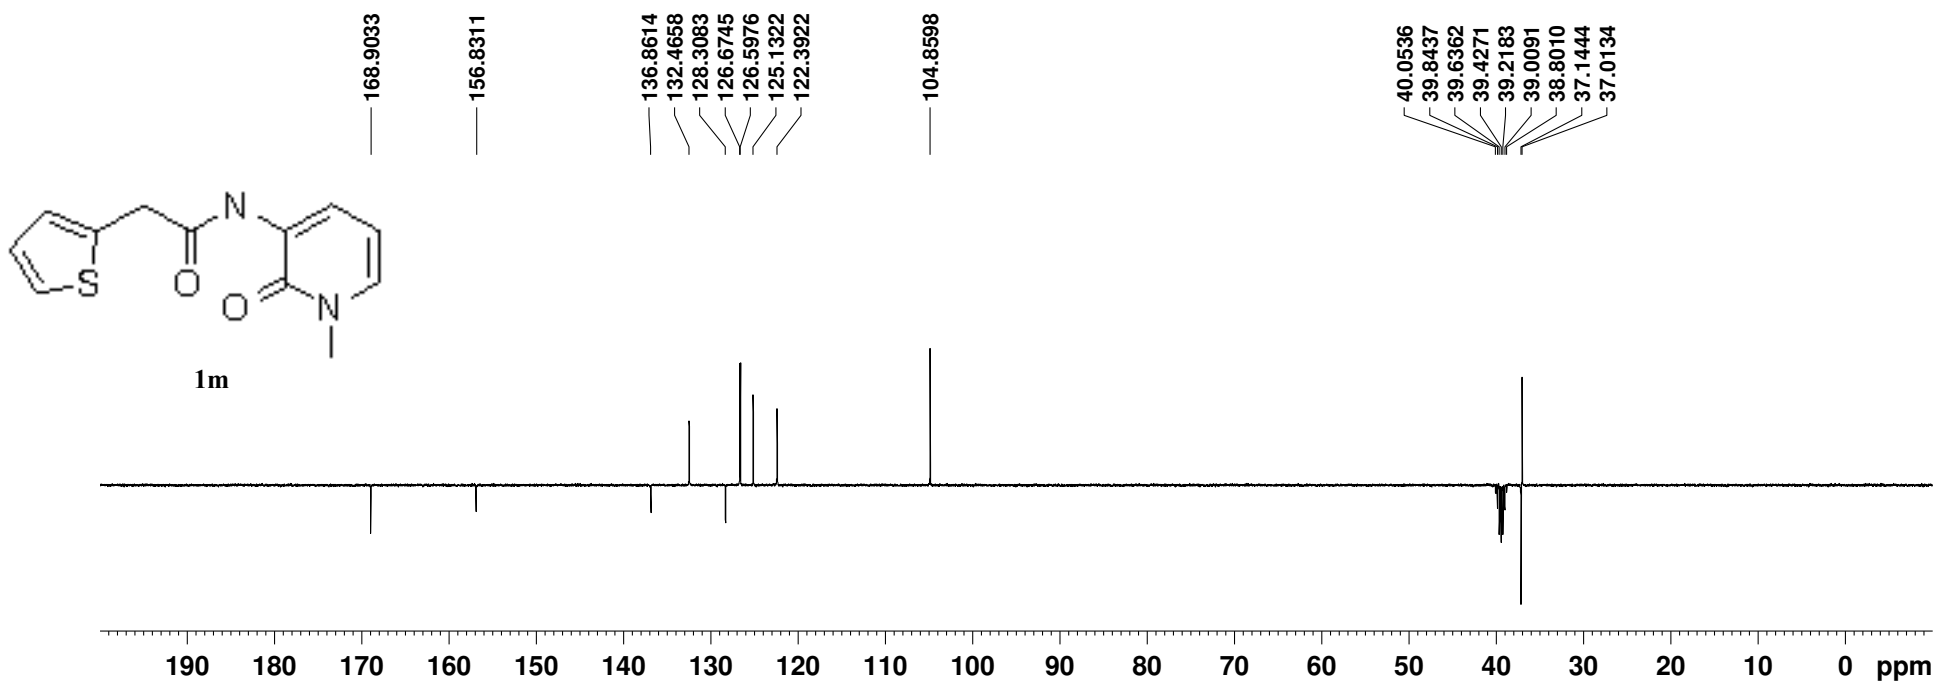

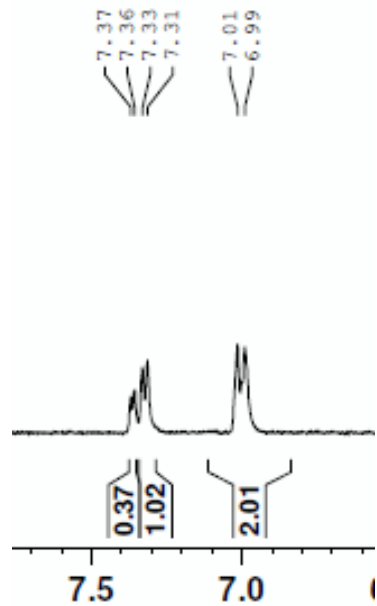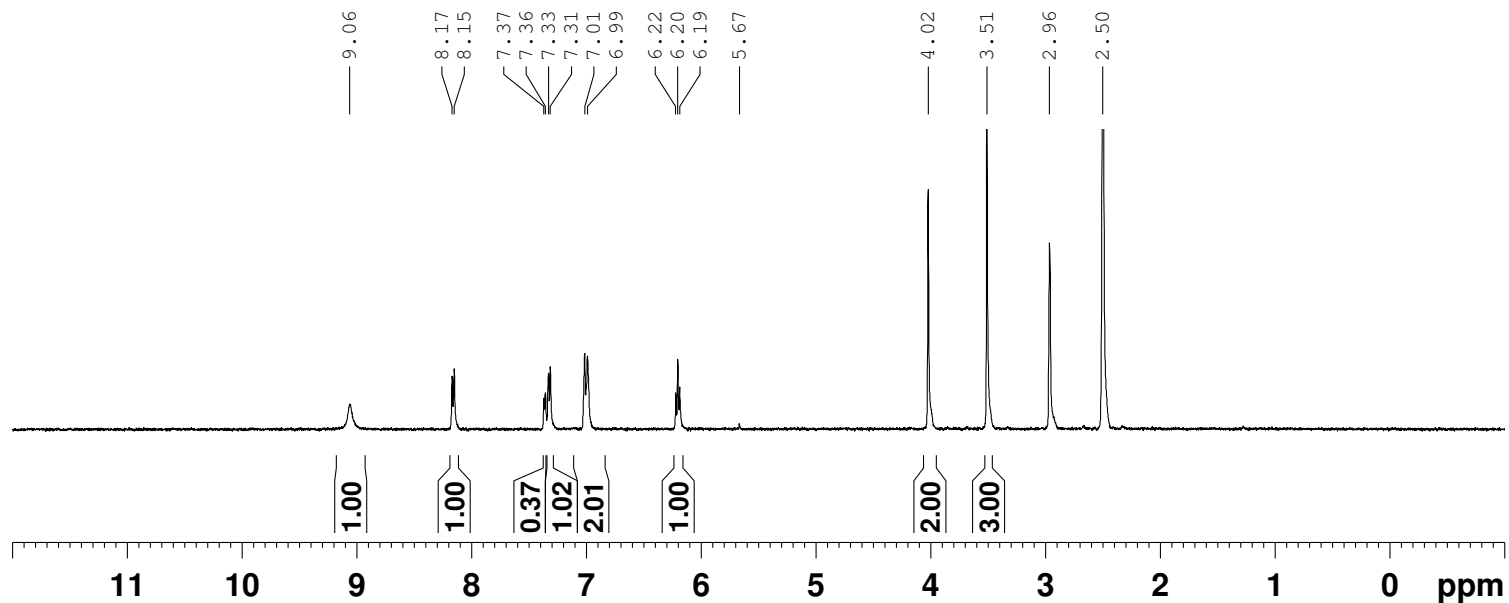

<sup>1</sup>H NMR of 2m IN DMSO AT 100°C

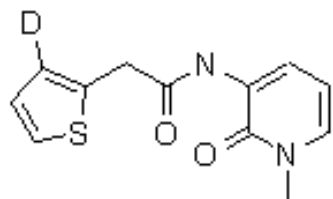

2m

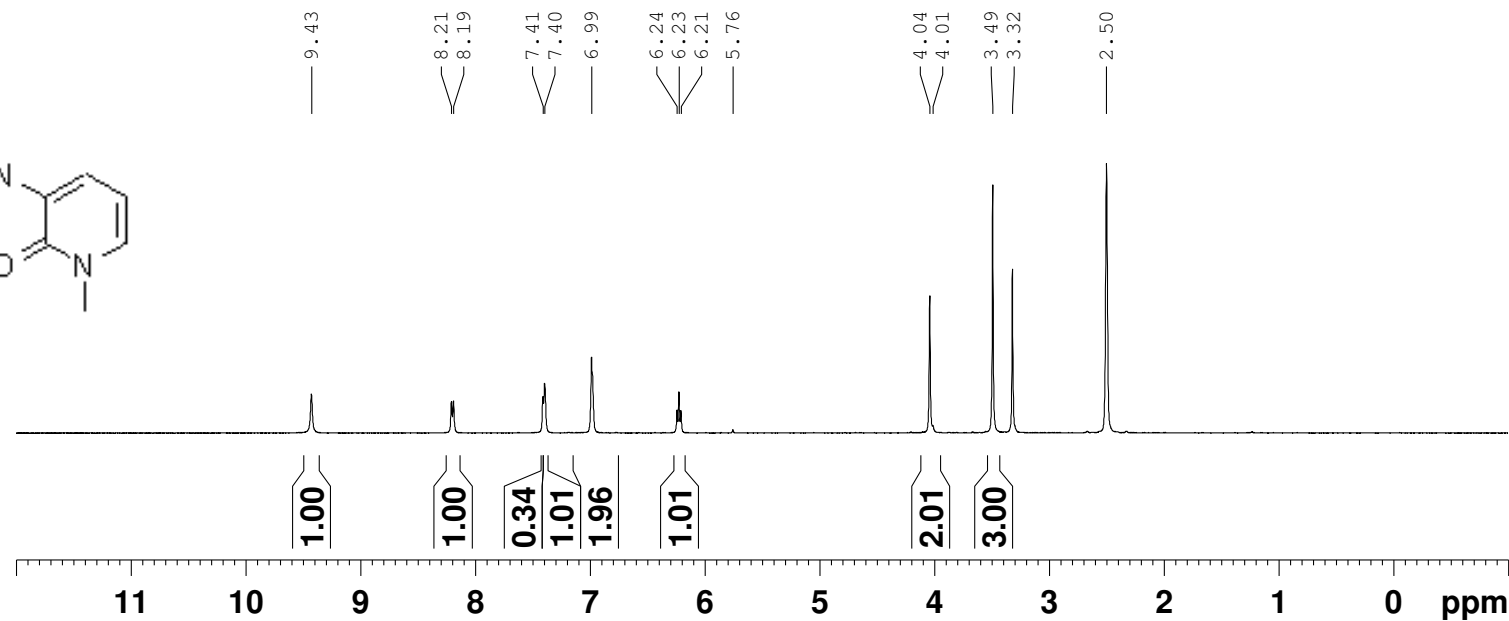

<sup>1</sup>H NMR of 2m IN DMSO AT 20°C

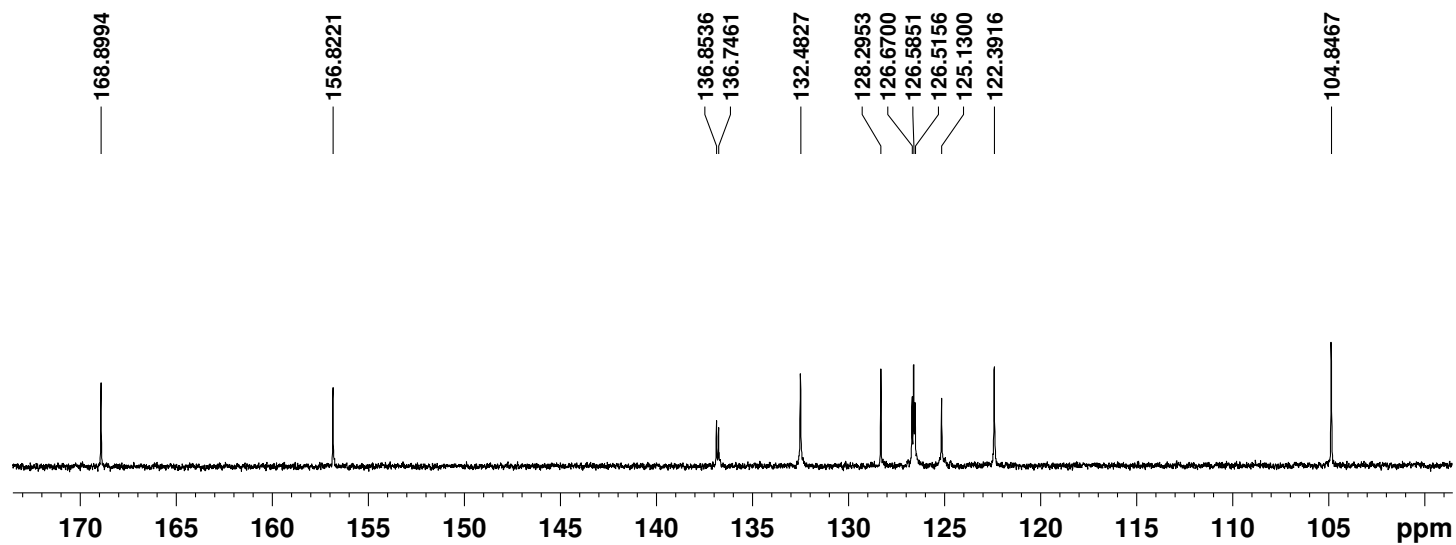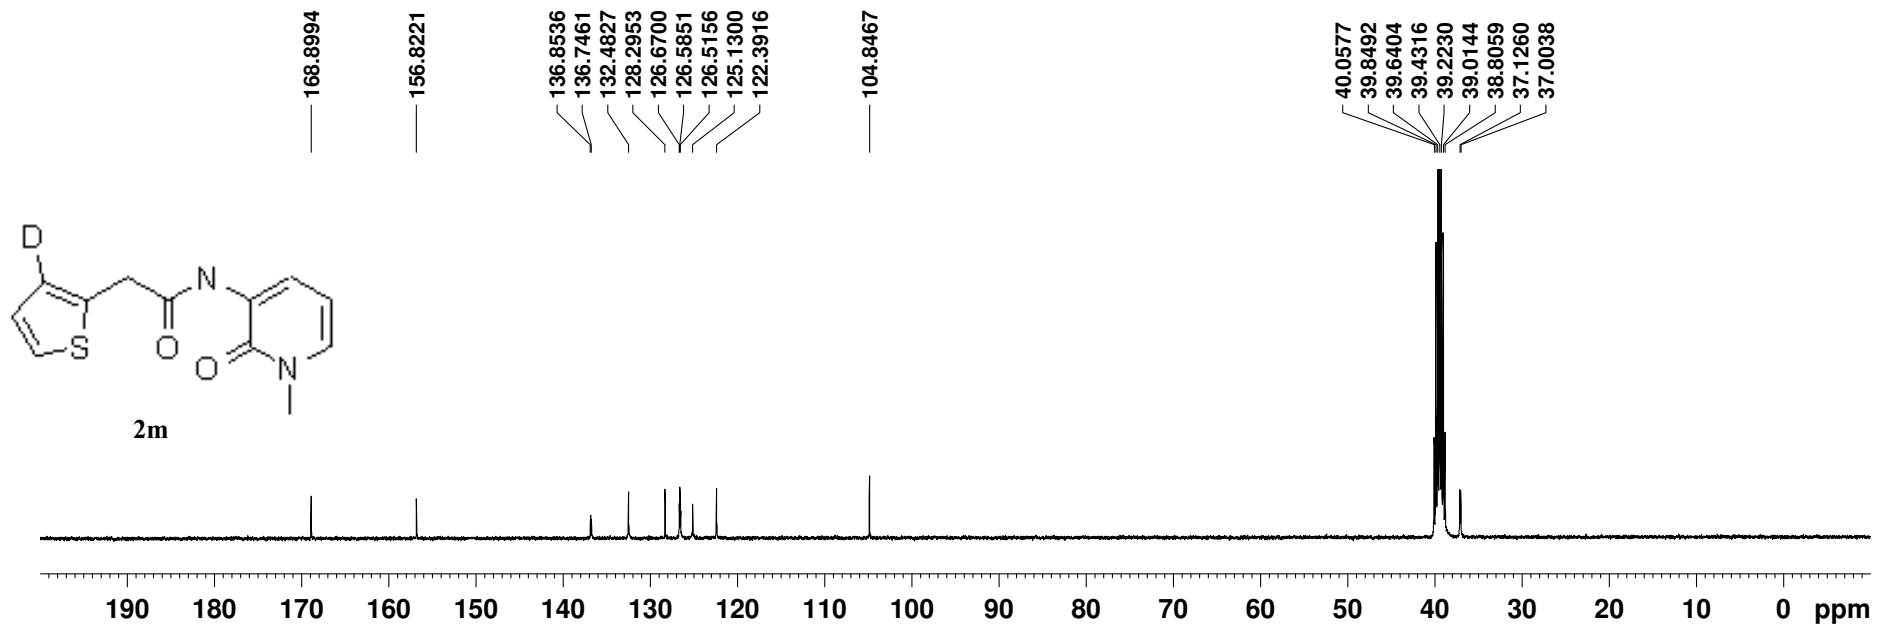

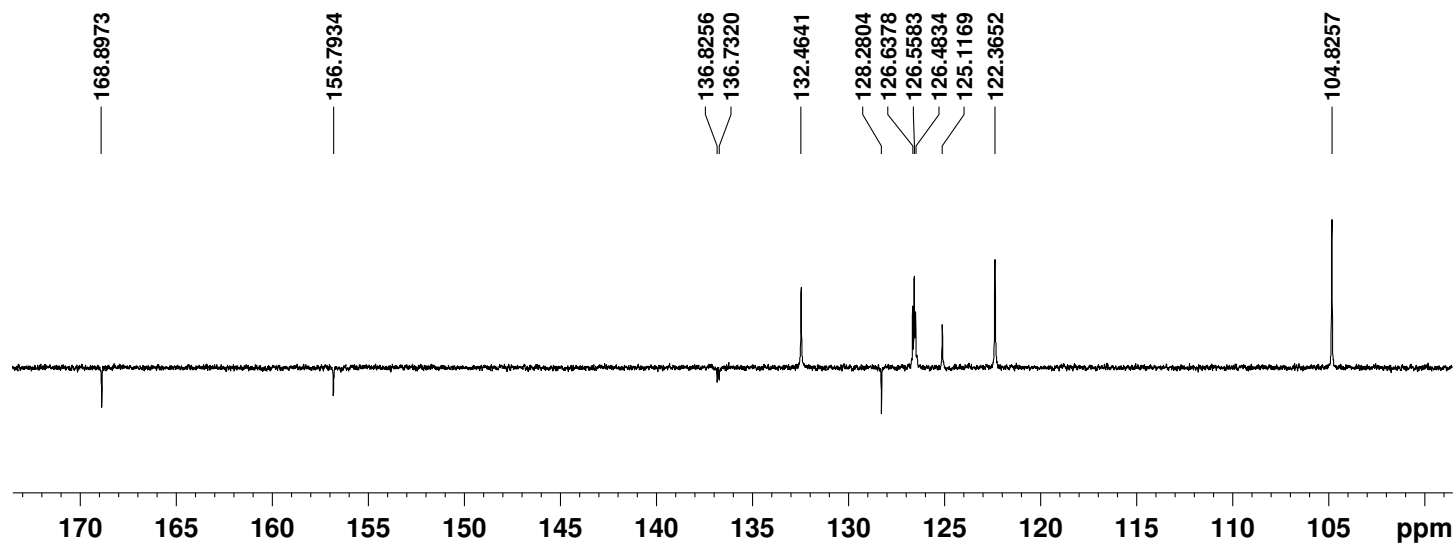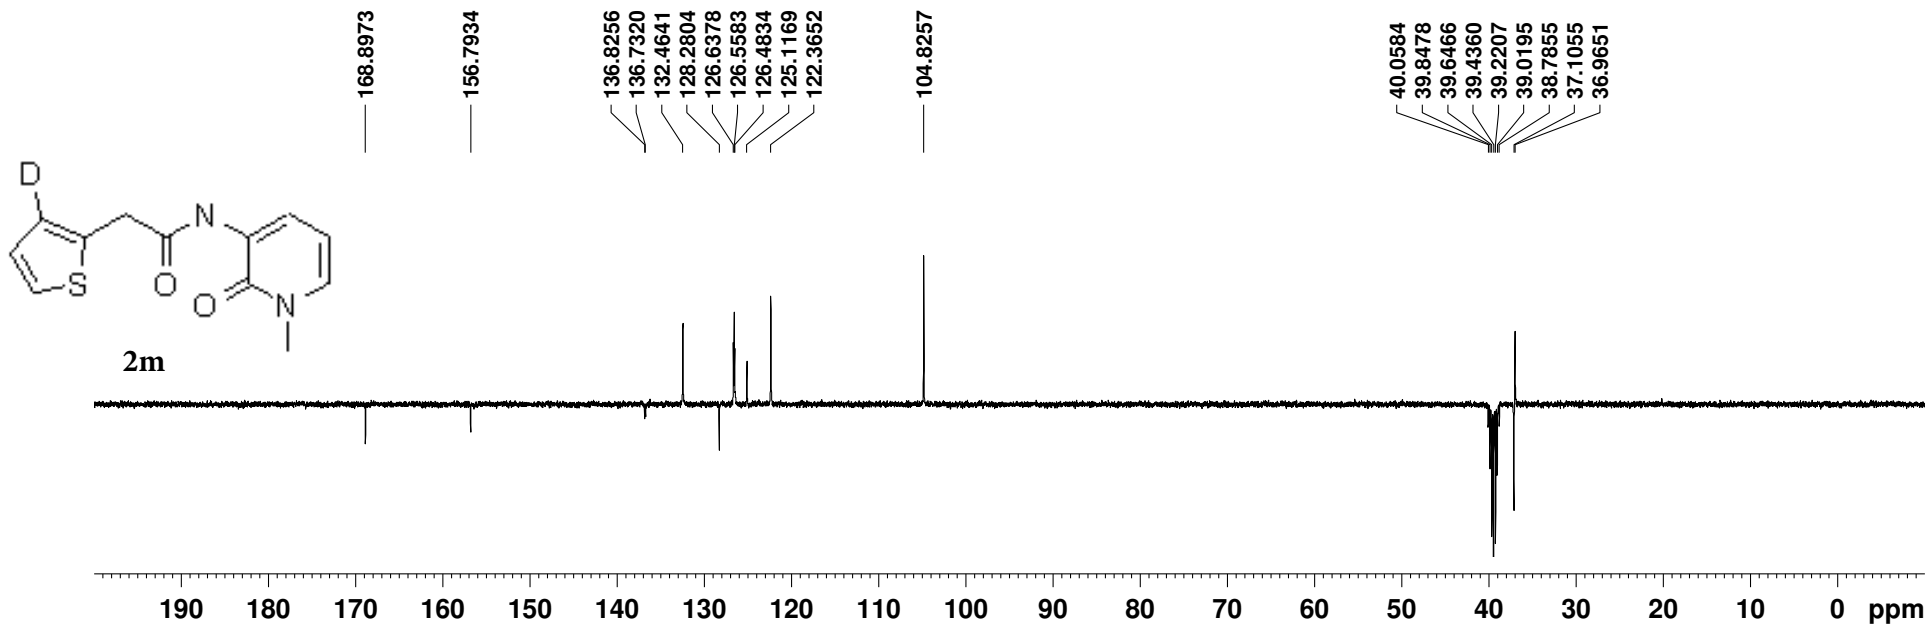



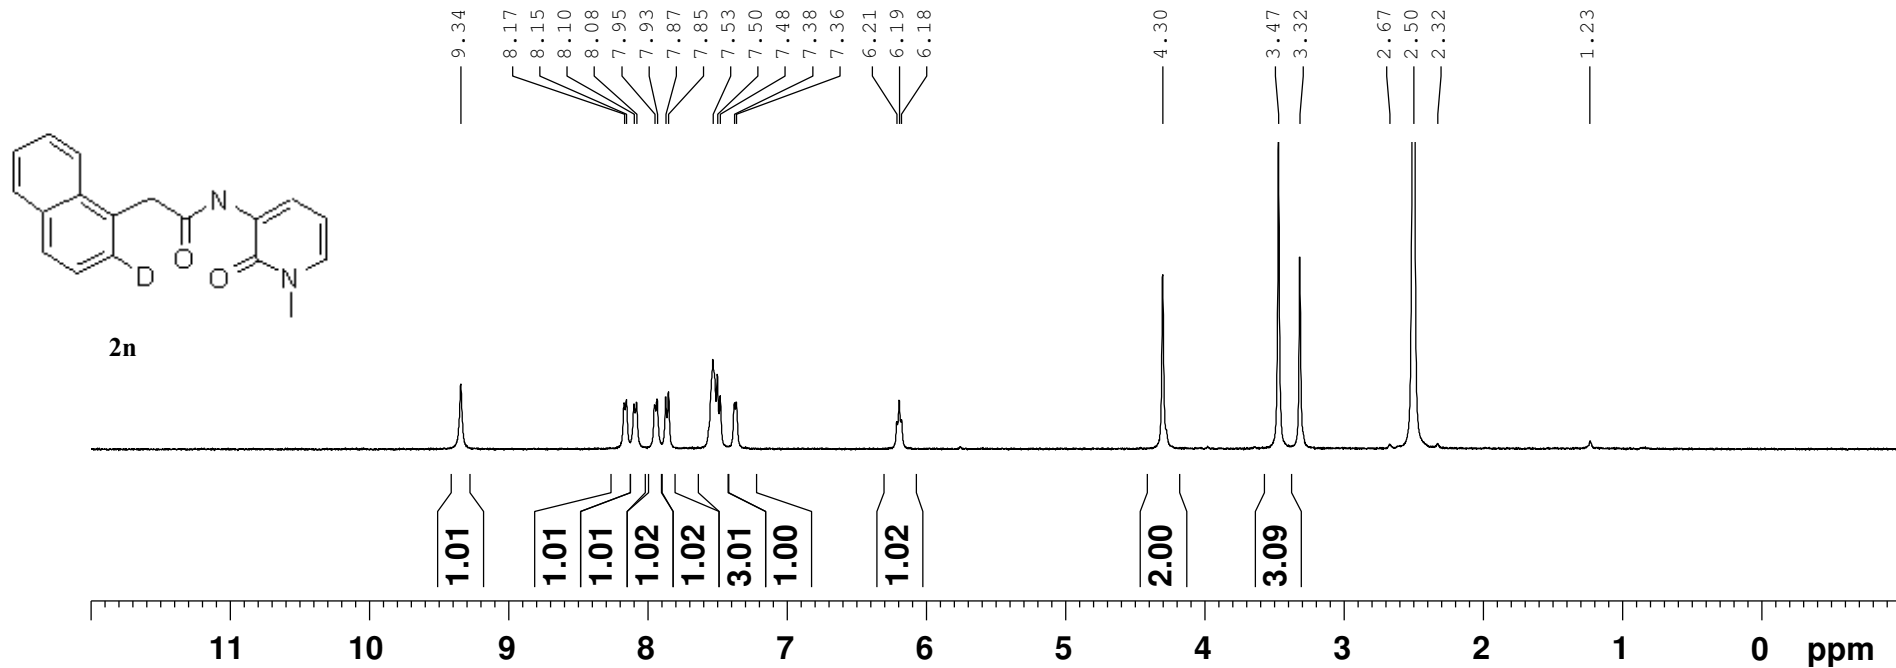

<sup>1</sup>H NMR of **2n** IN DMSO

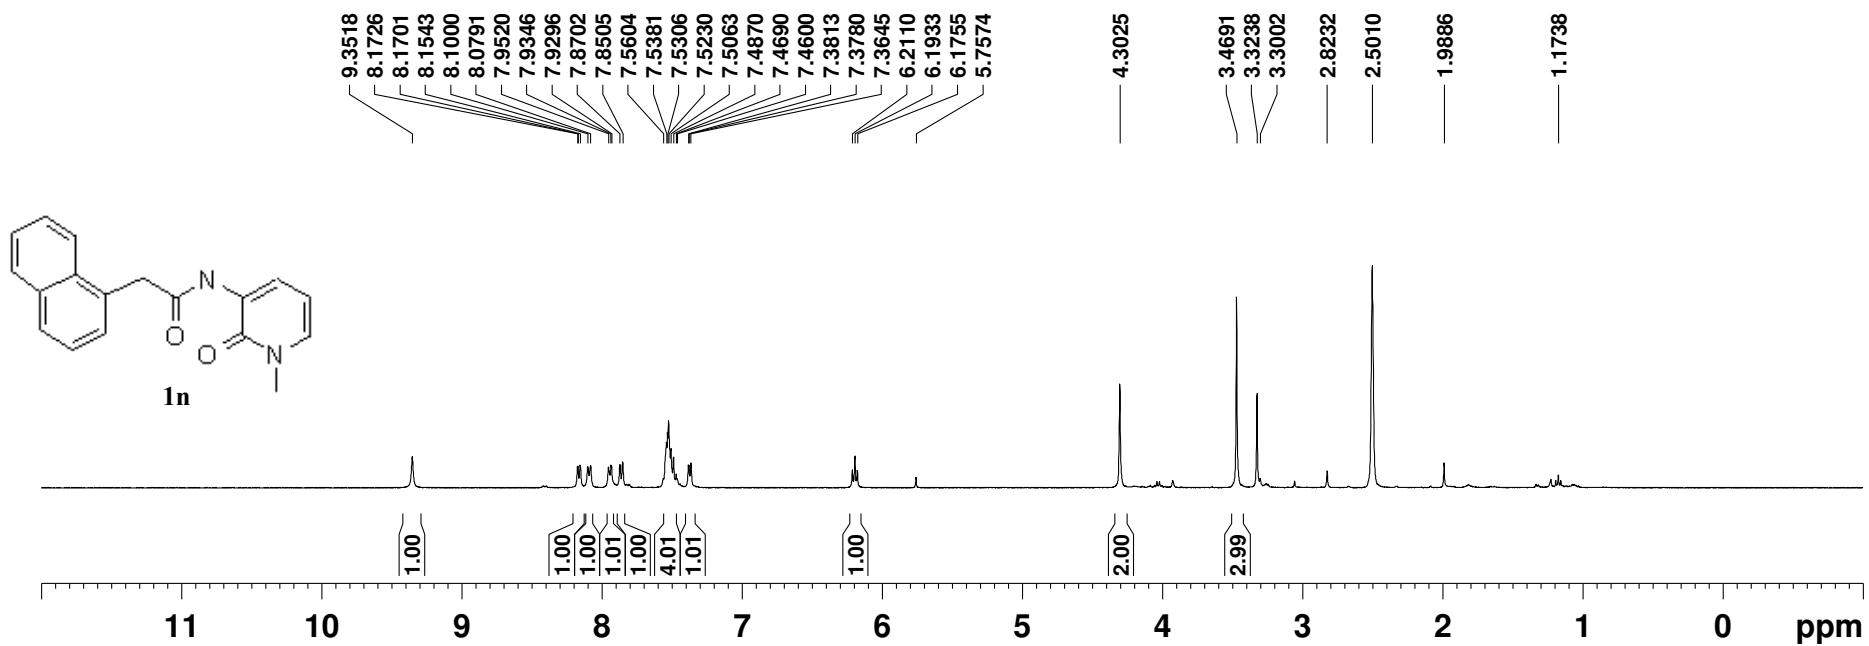

<sup>1</sup>H NMR of **1n** IN DMSO

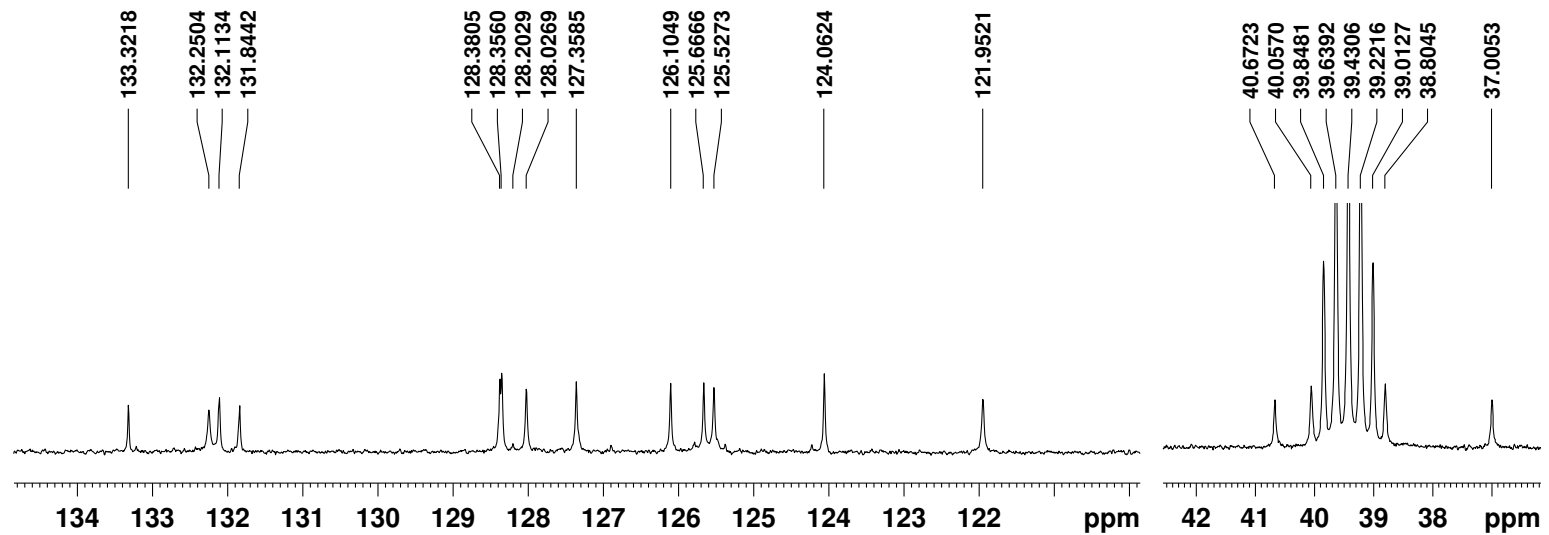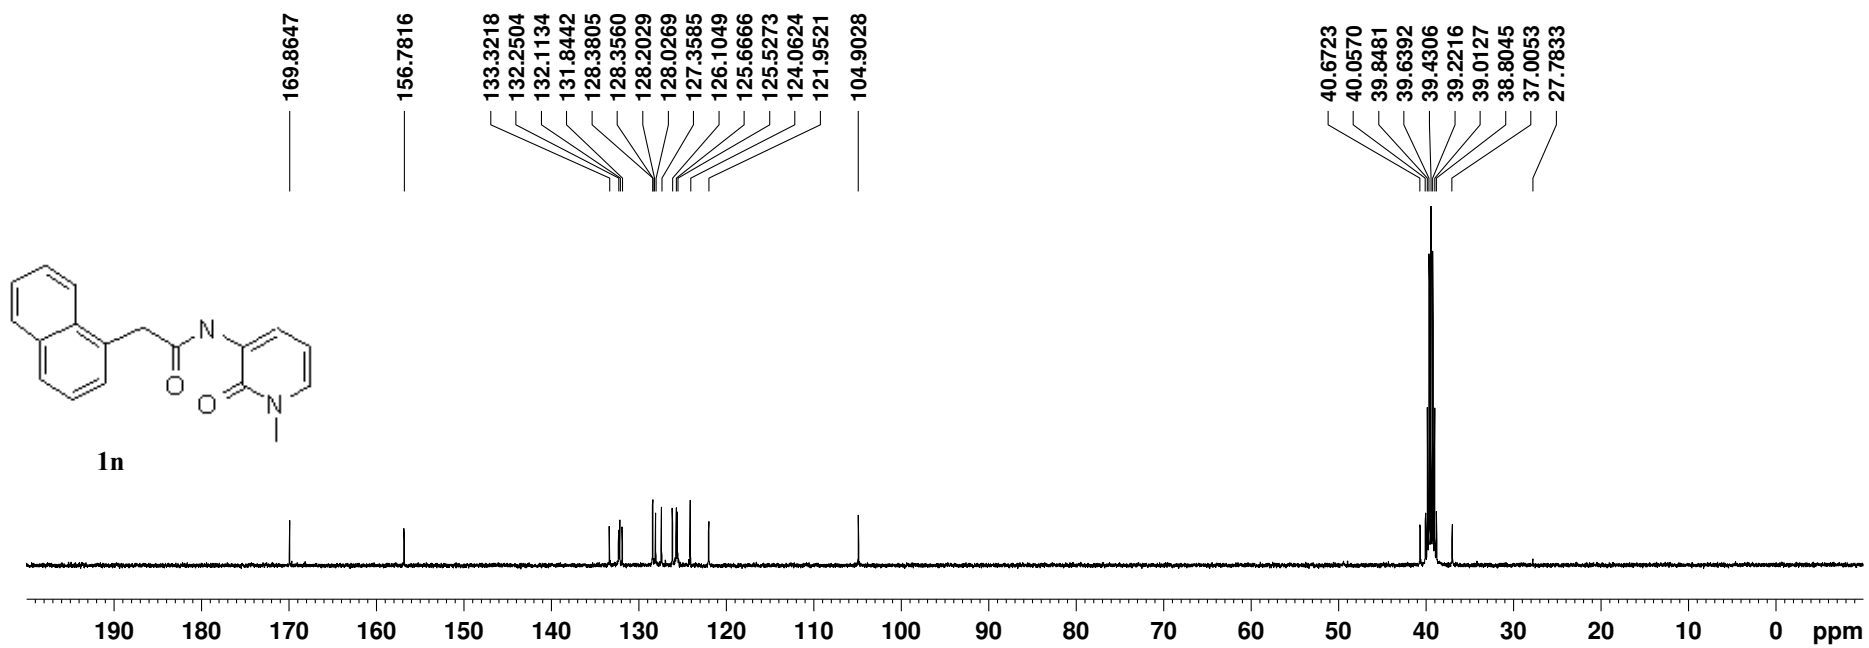

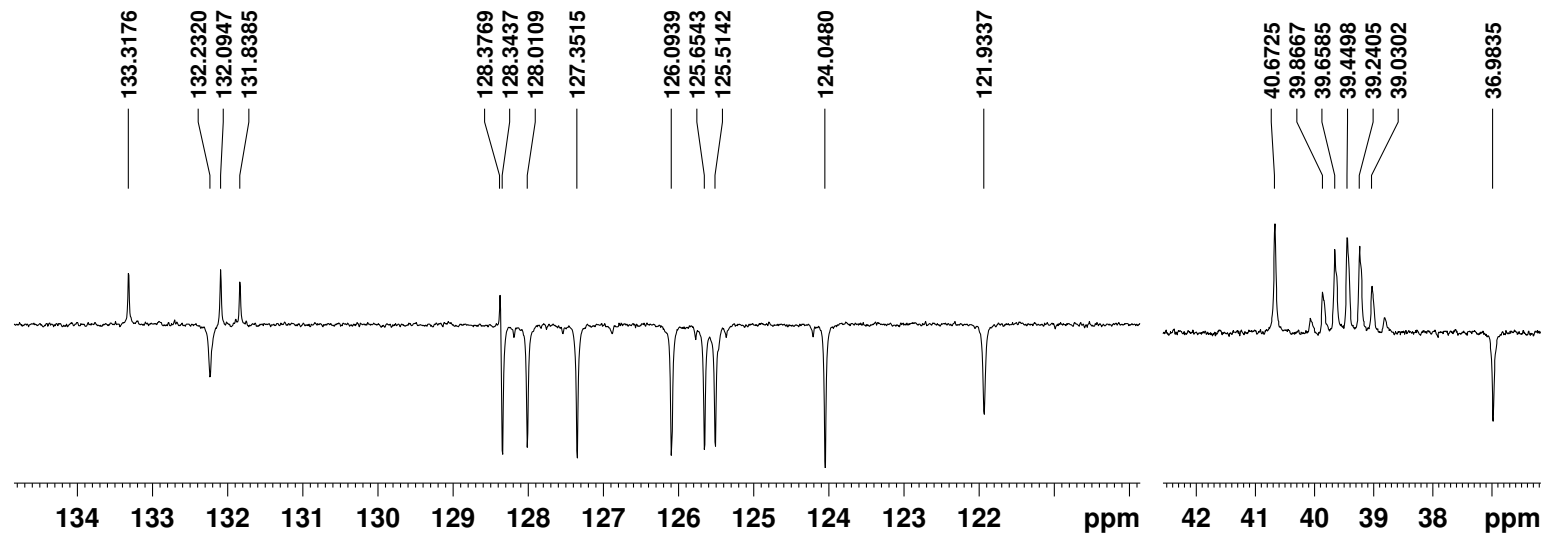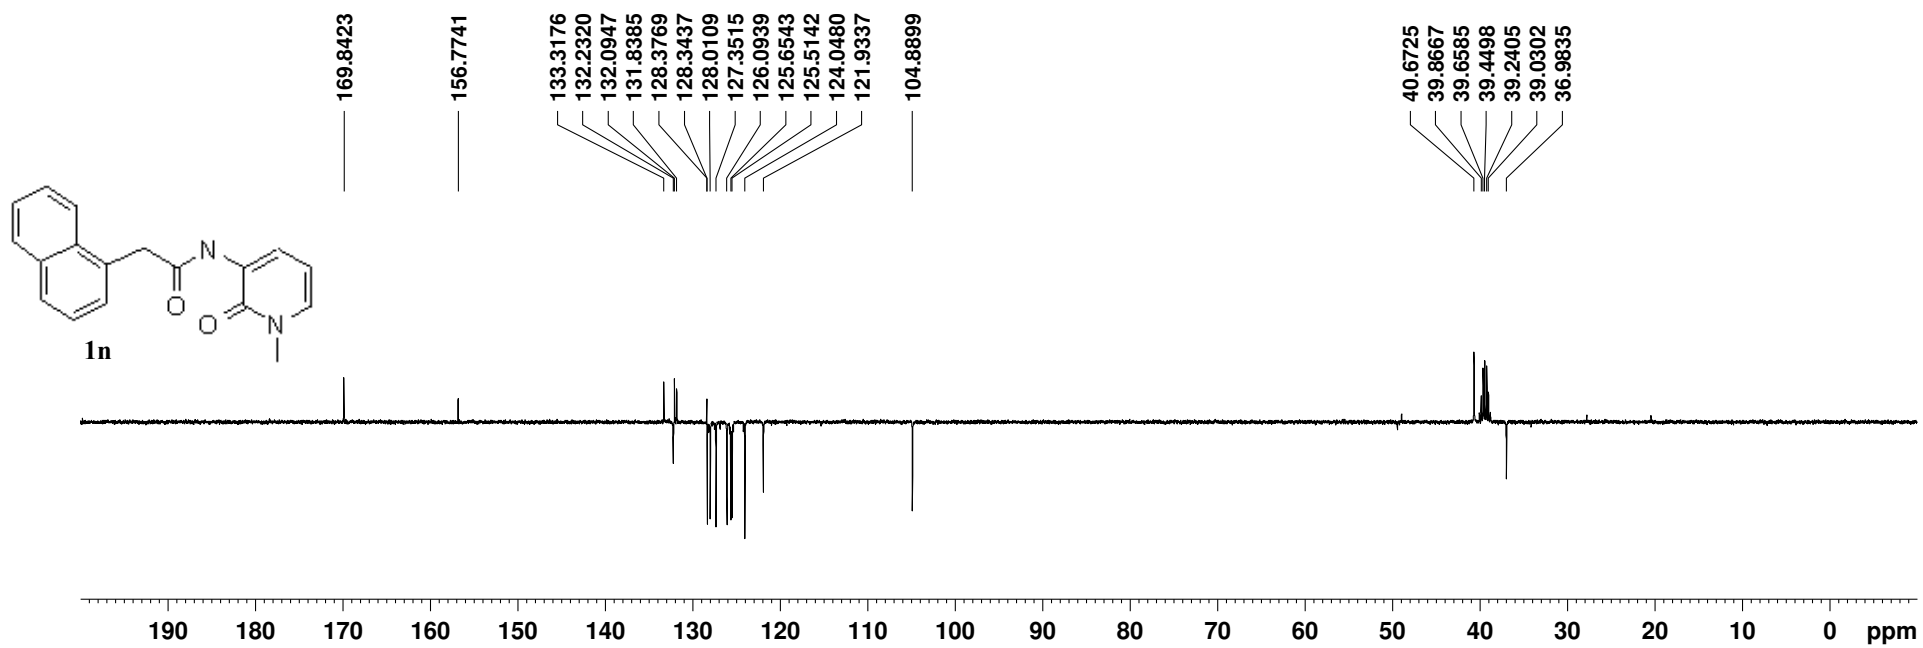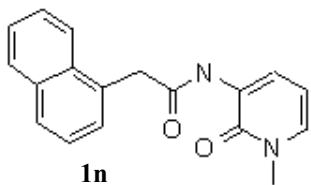

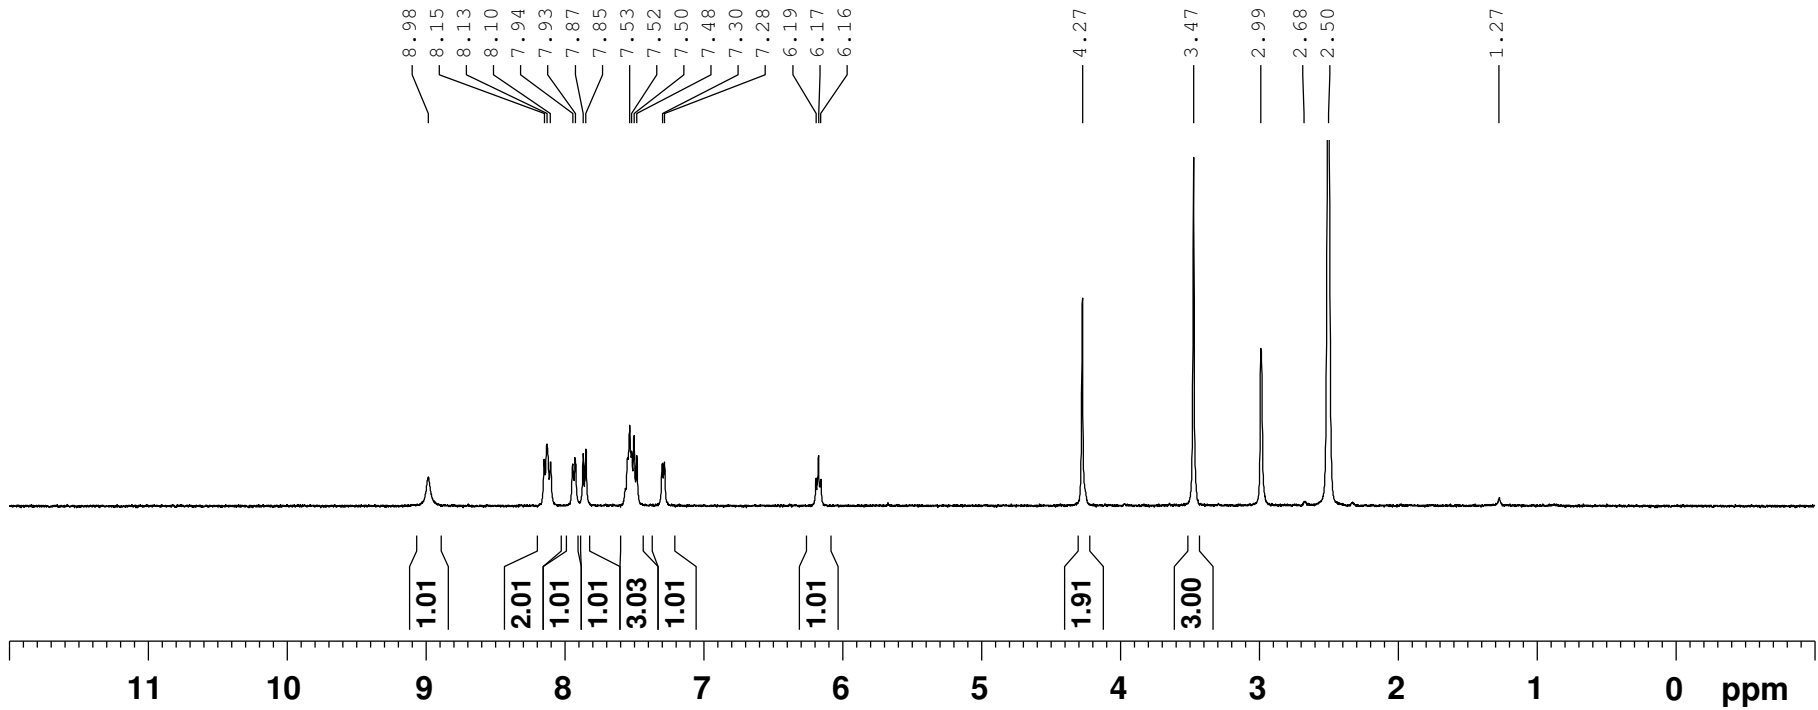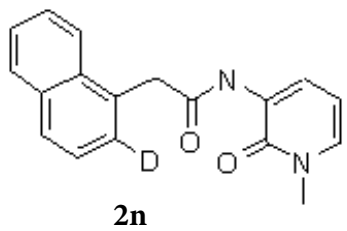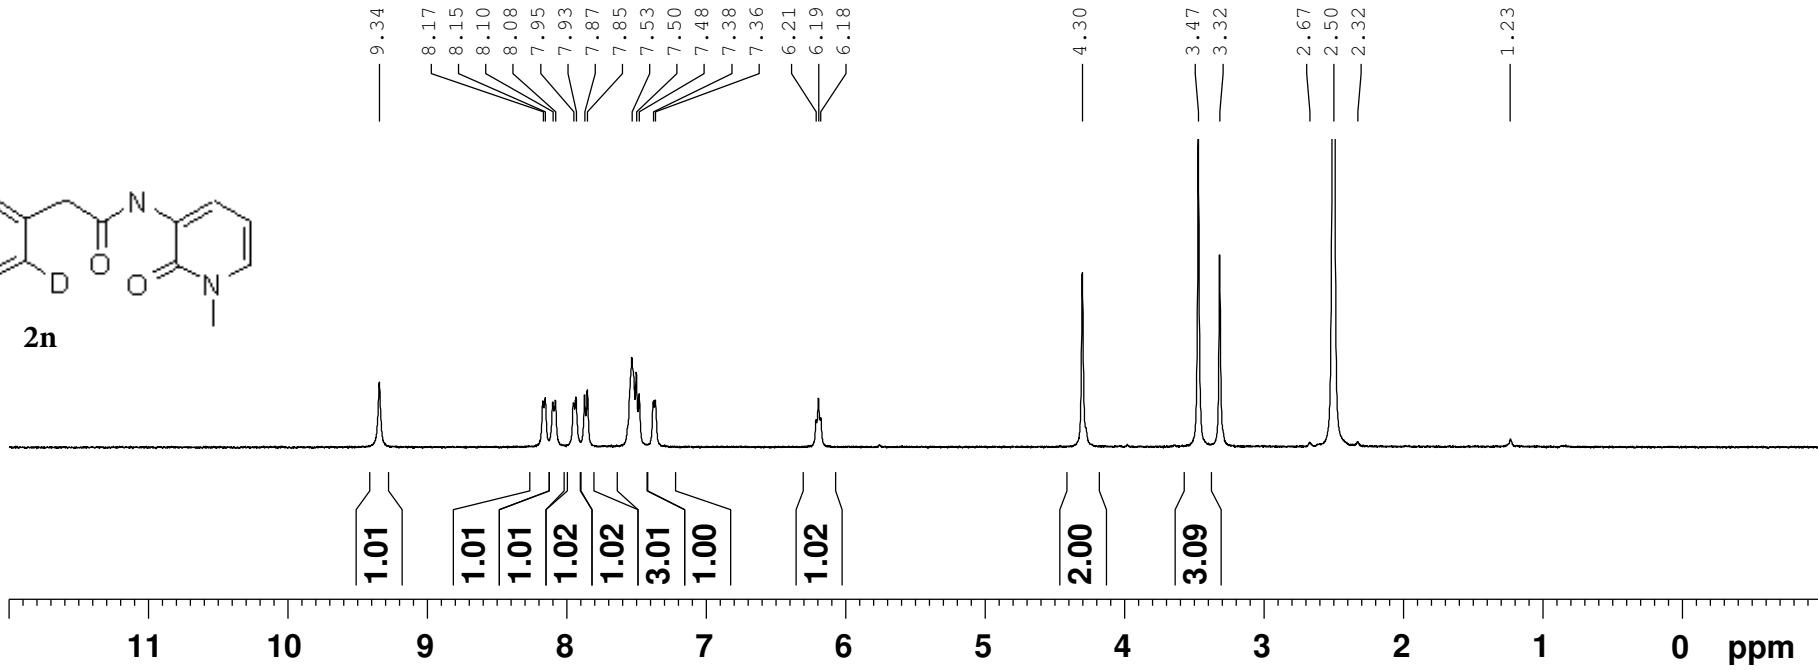

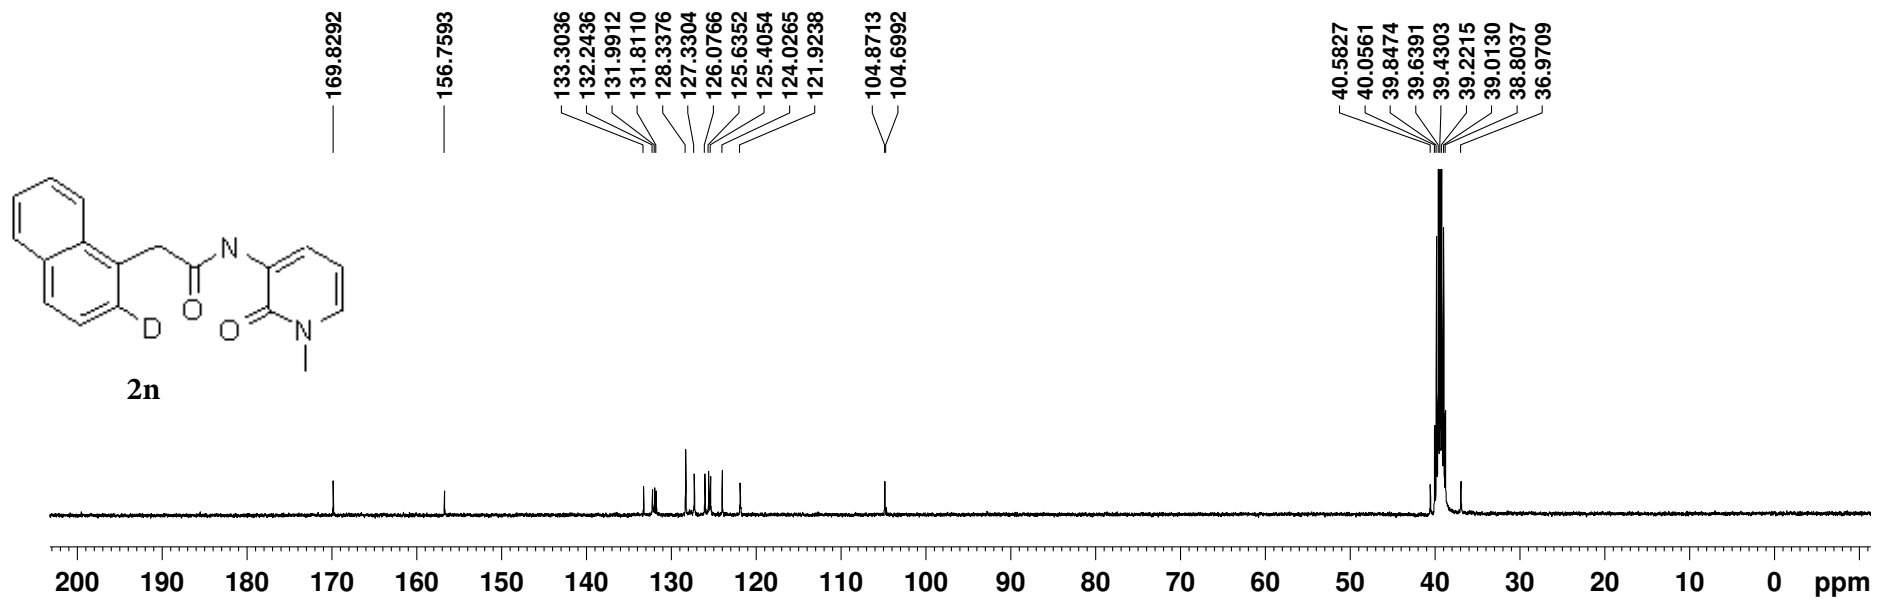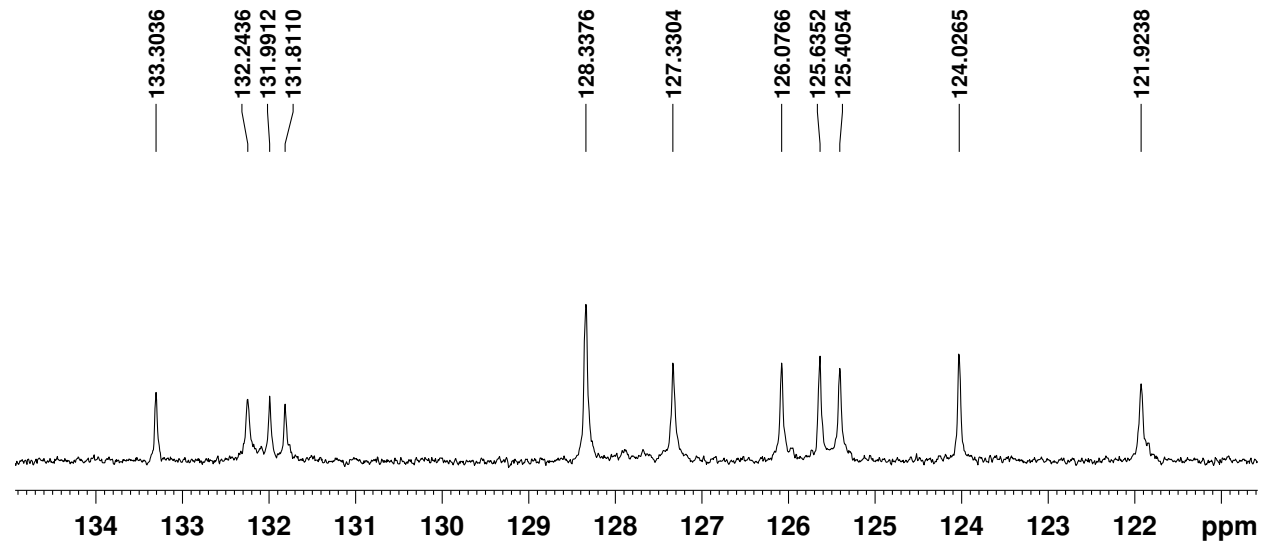

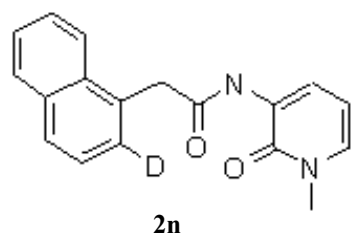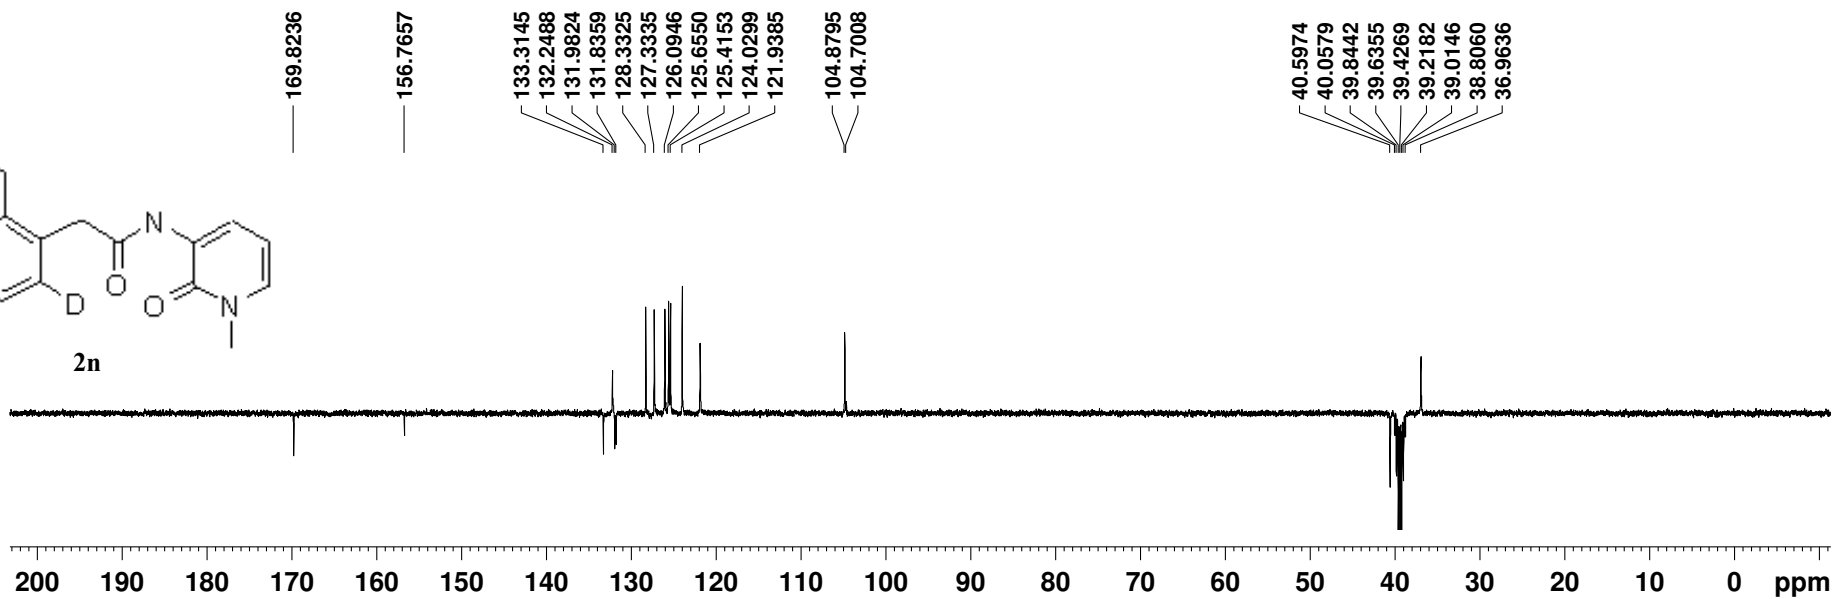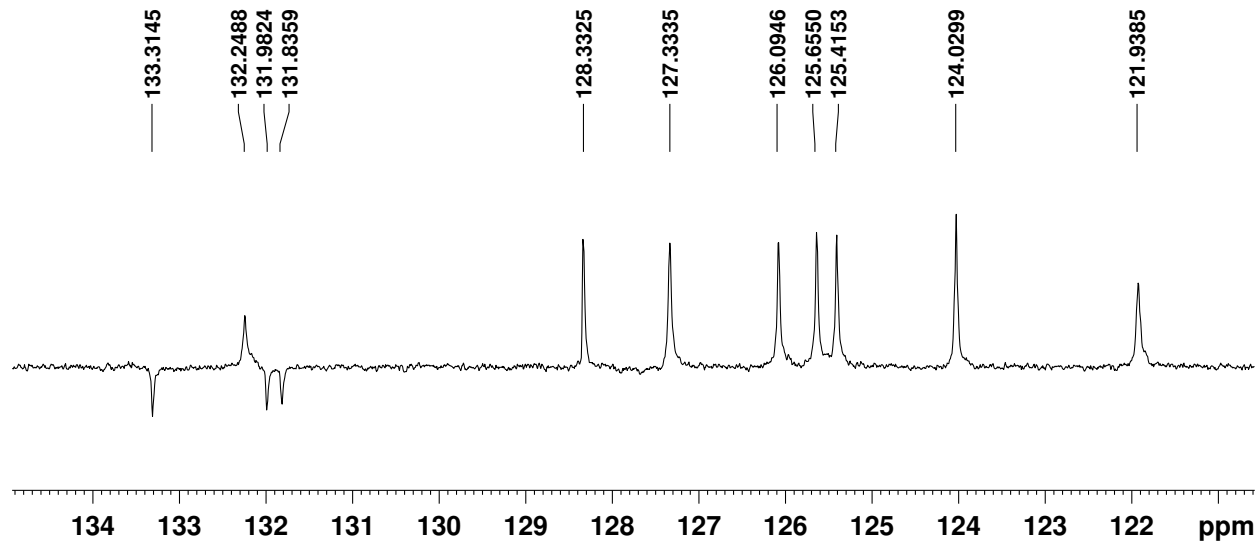

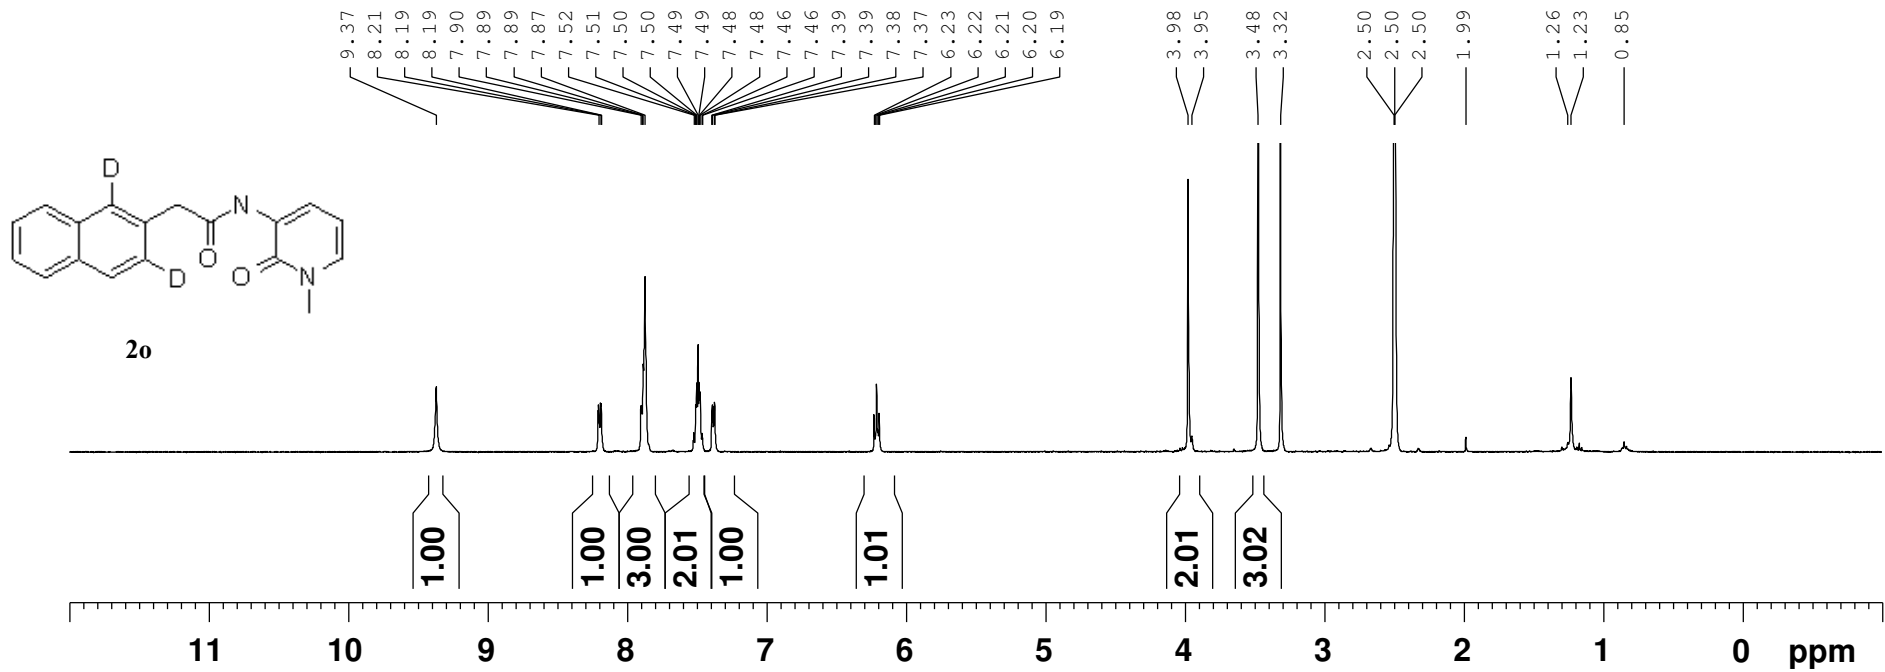

<sup>1</sup>H NMR of **2o** IN DMSO

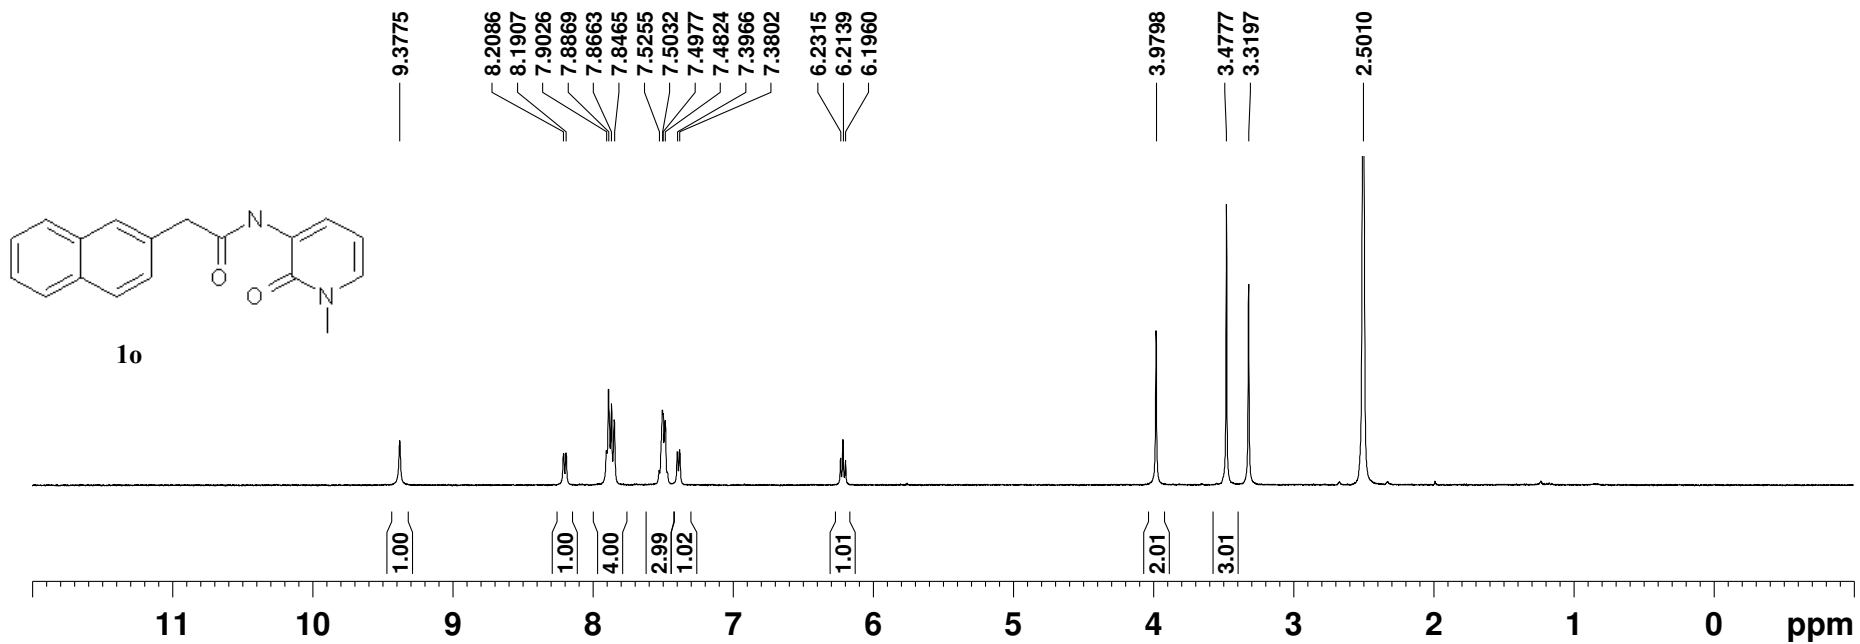

<sup>1</sup>H NMR of **1o** IN DMSO

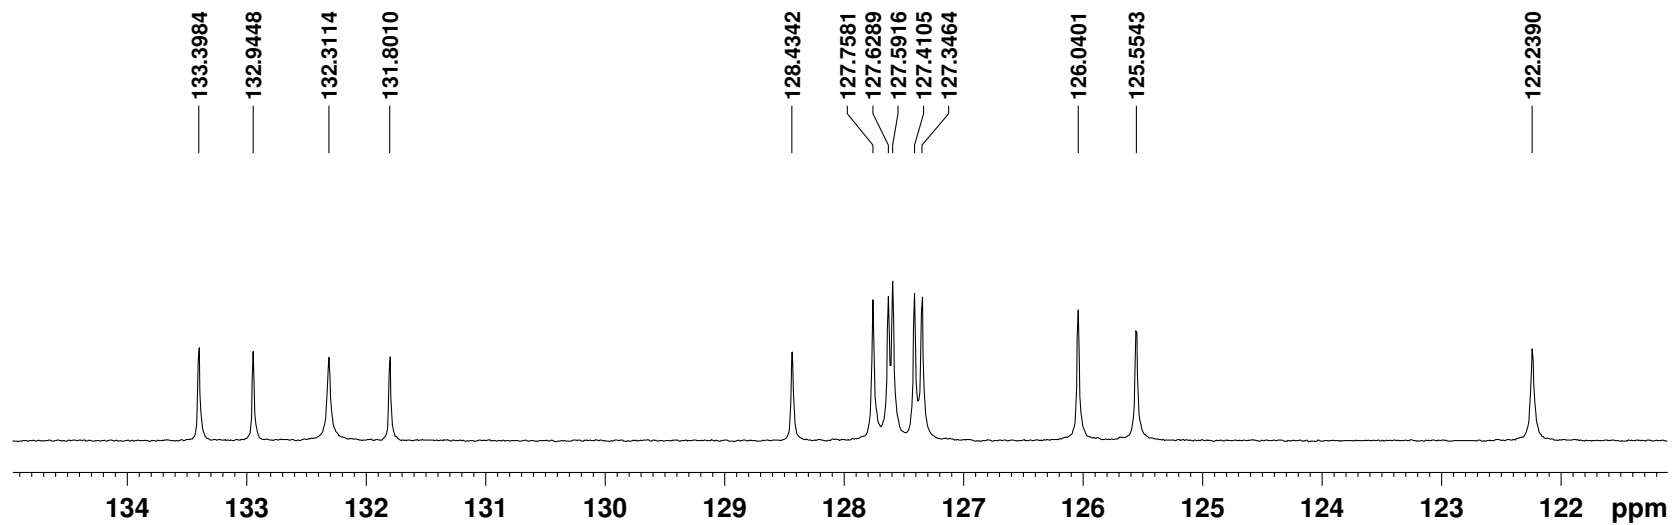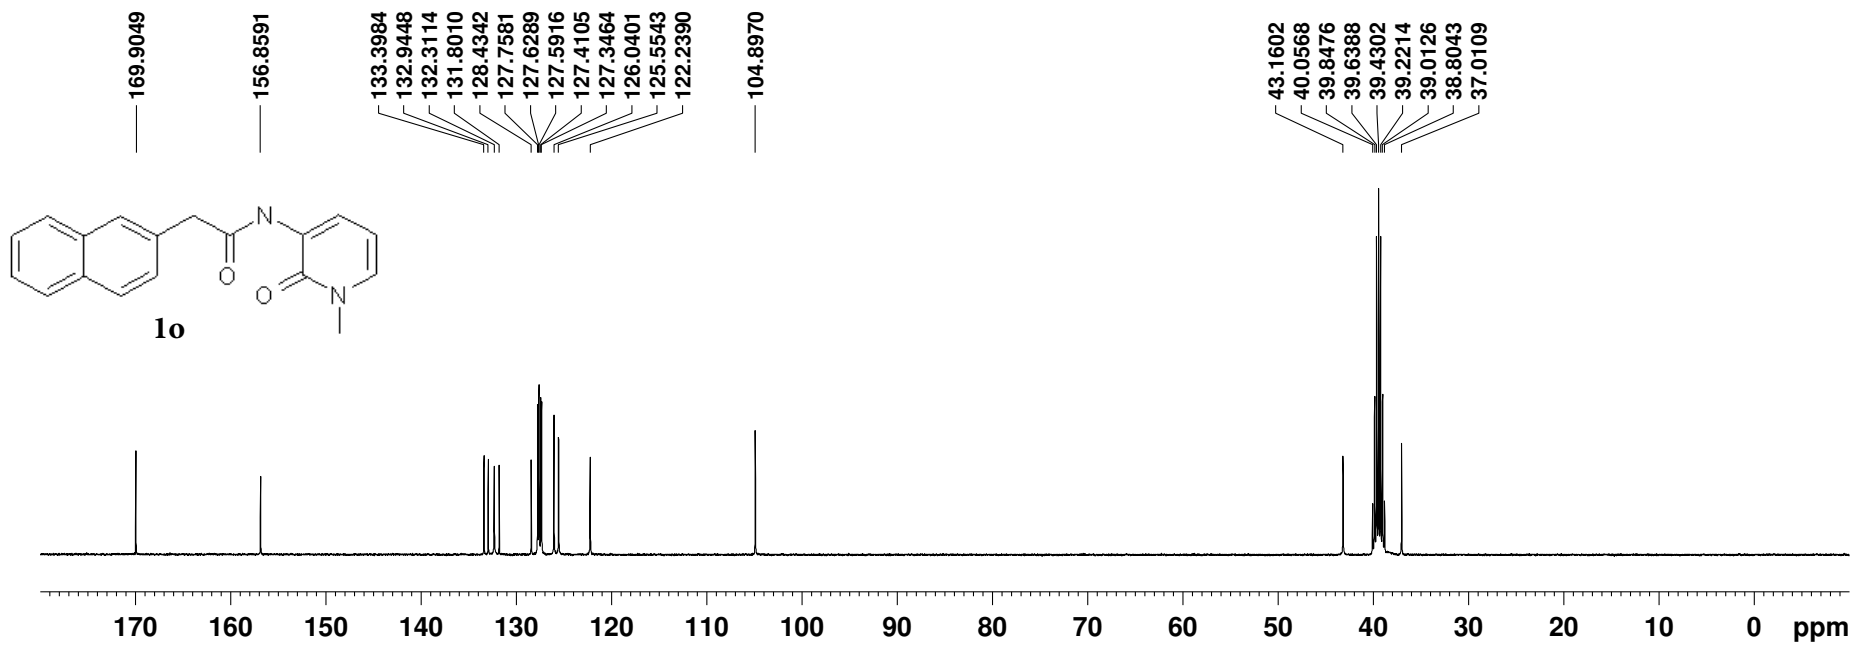



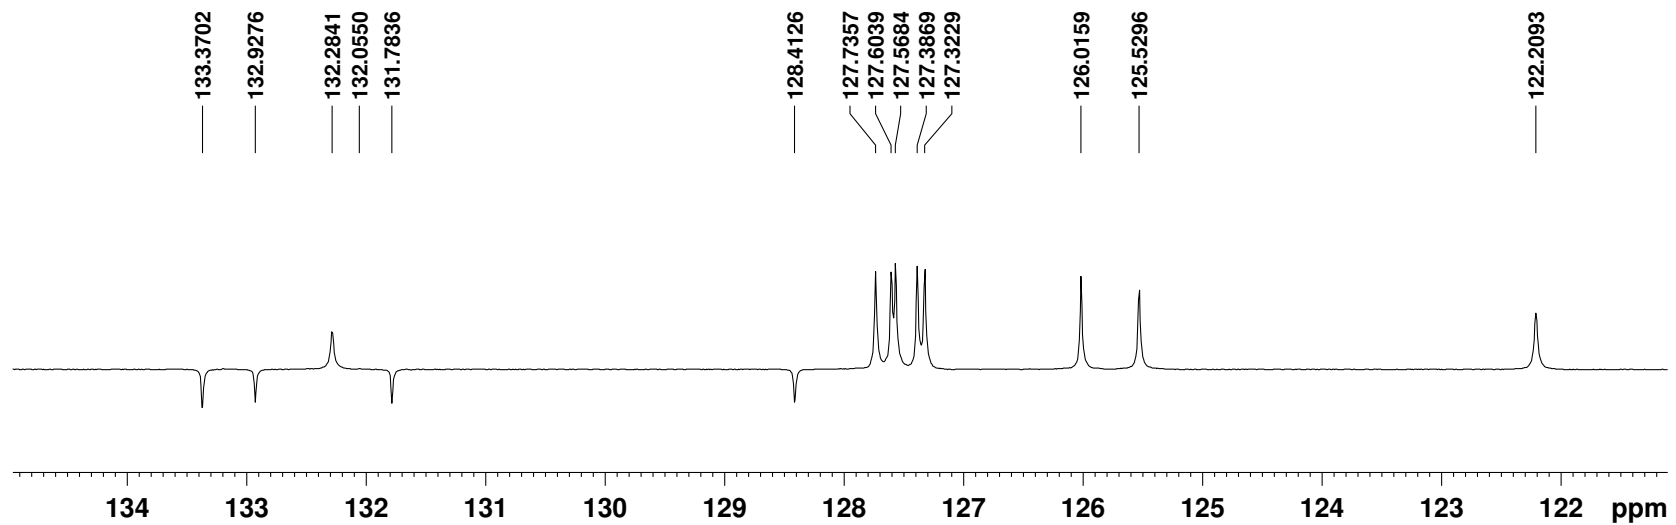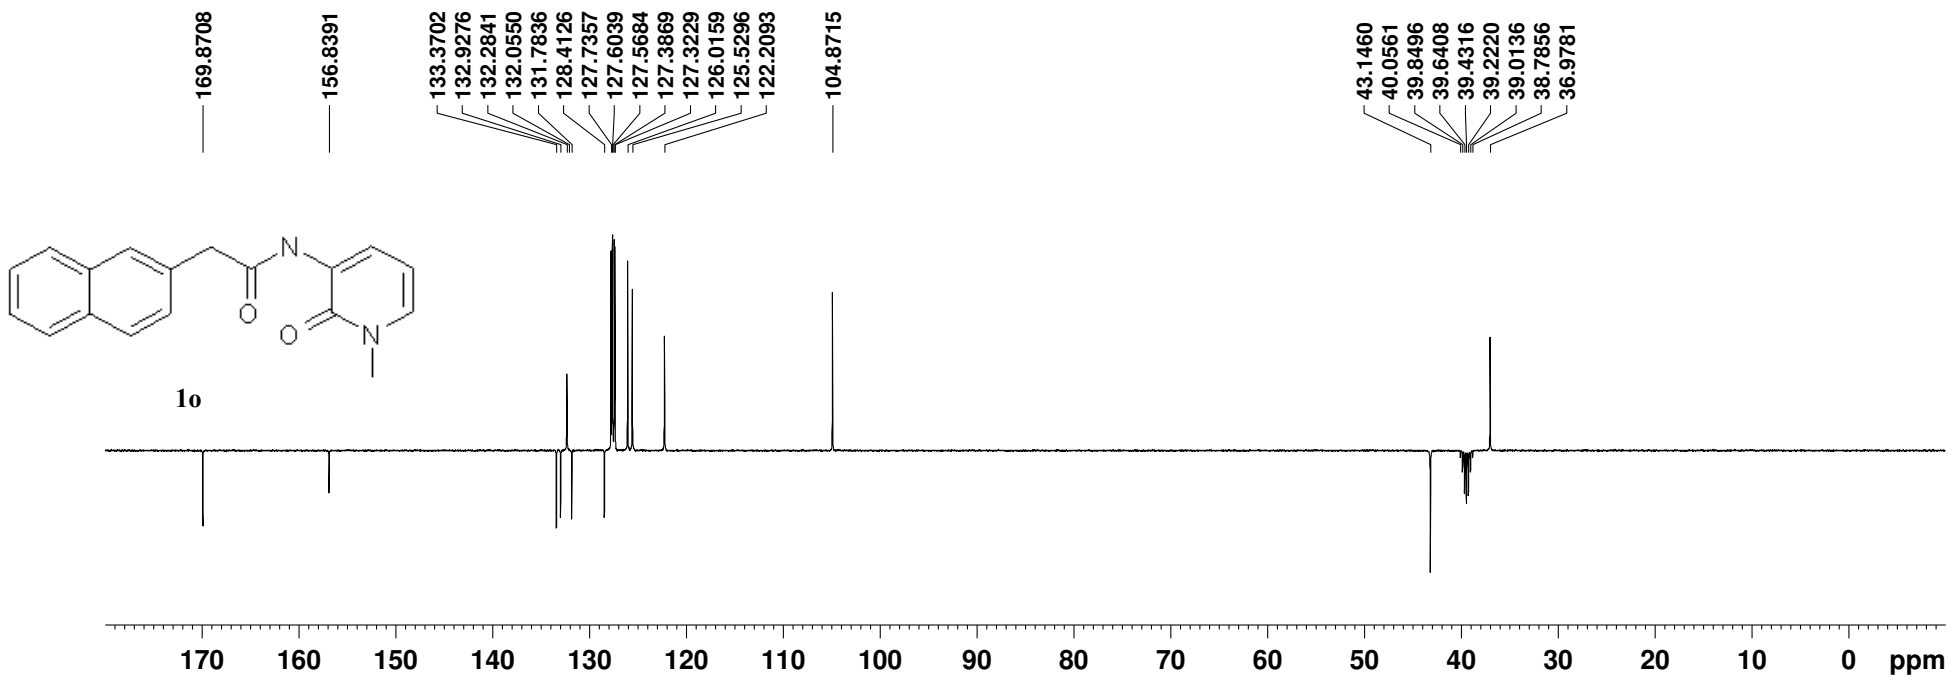

APT of 1o IN DMSO

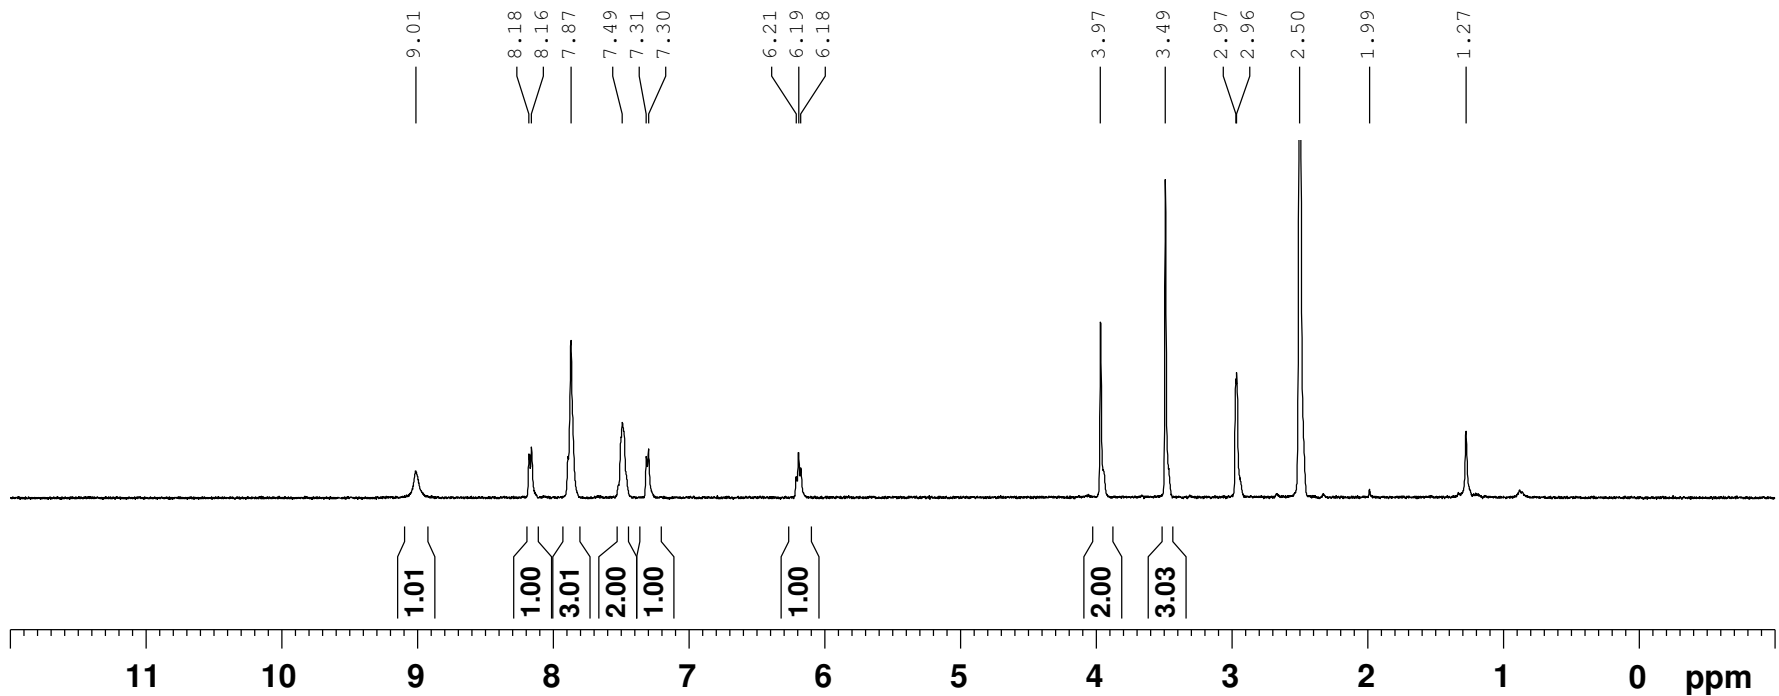

**<sup>1</sup>H NMR of 2o IN DMSO AT 100°C**

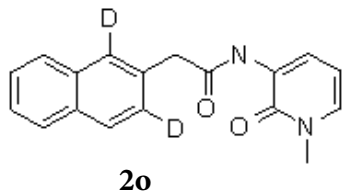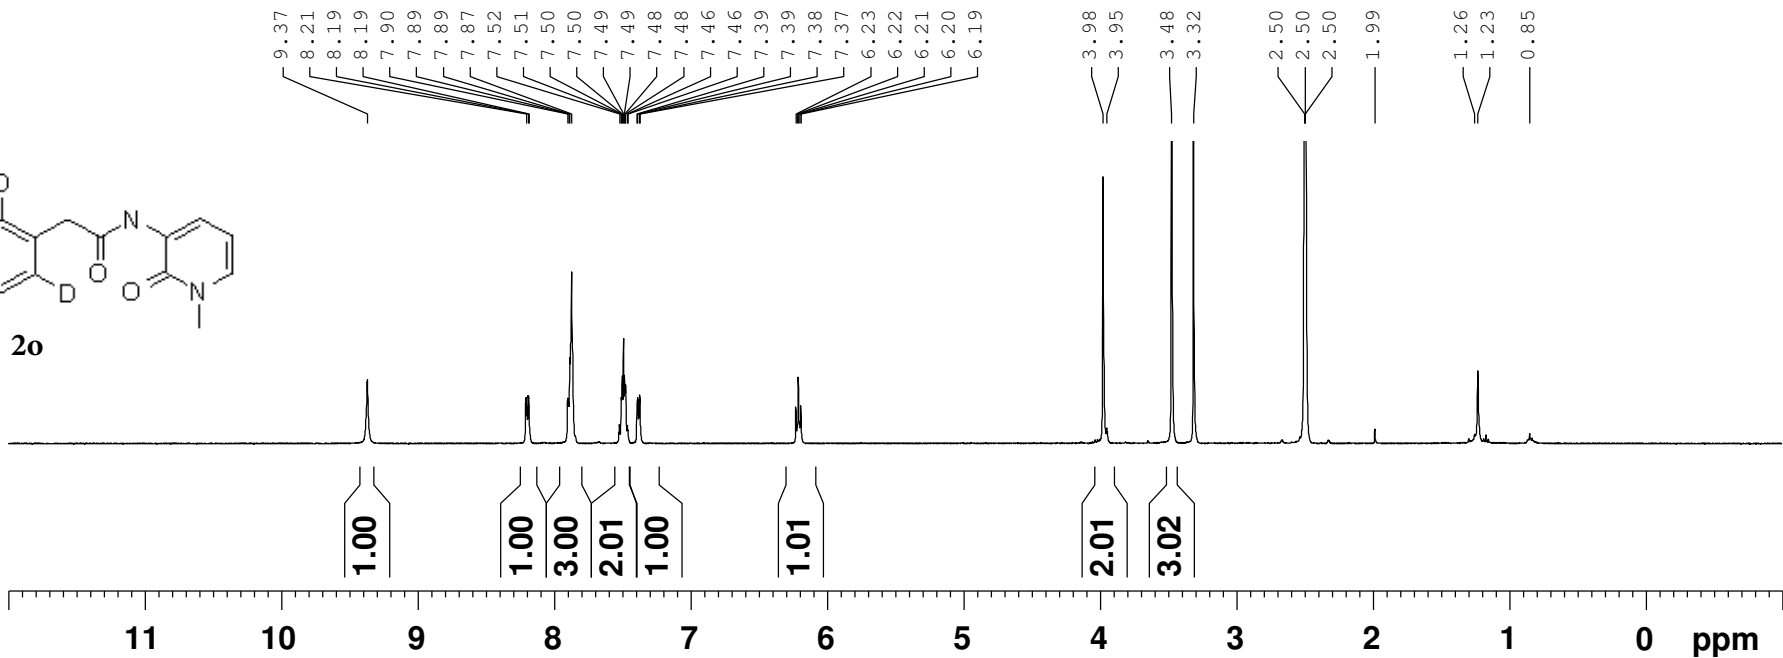

**<sup>1</sup>H NMR of 2o IN DMSO AT 20°C**

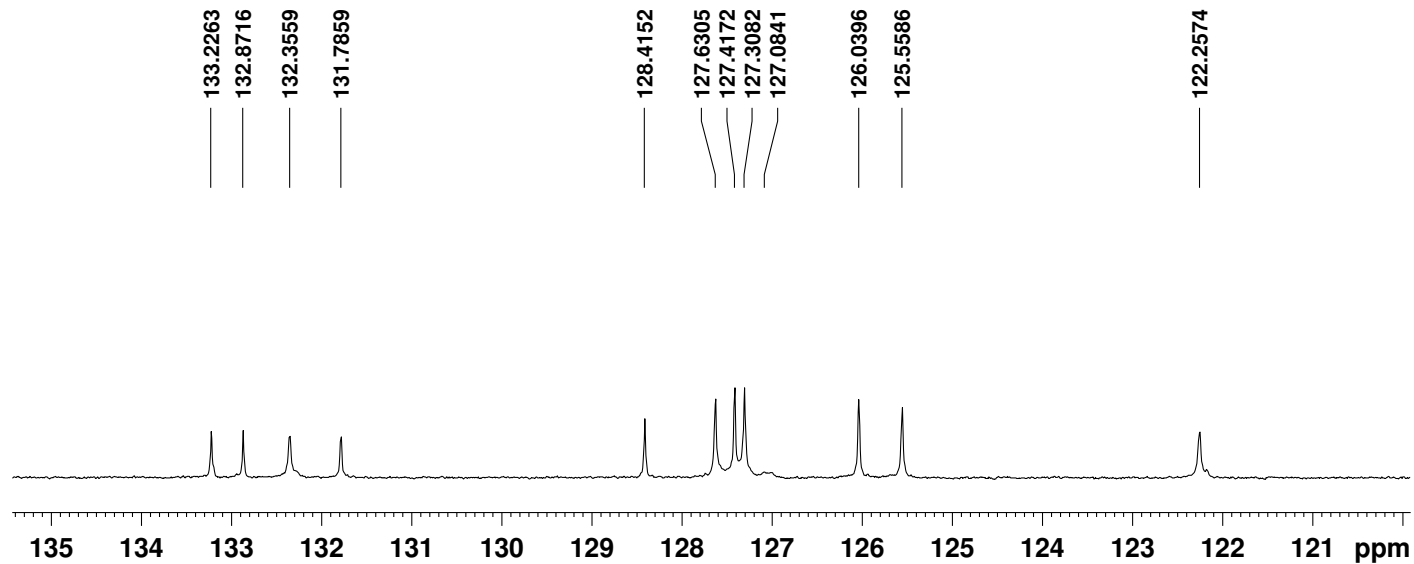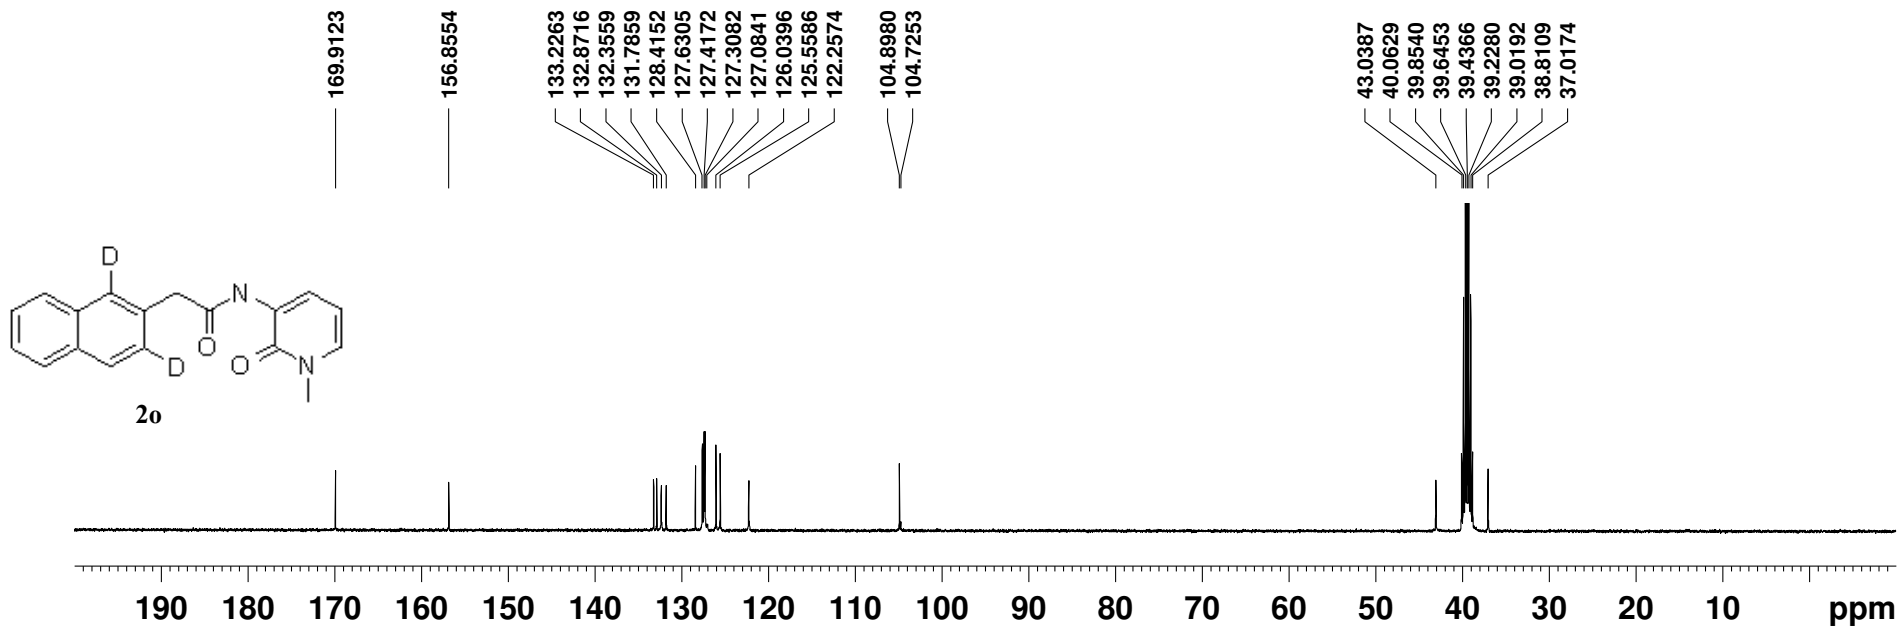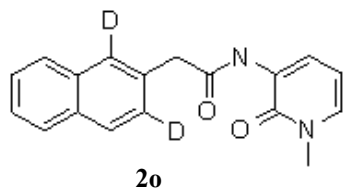

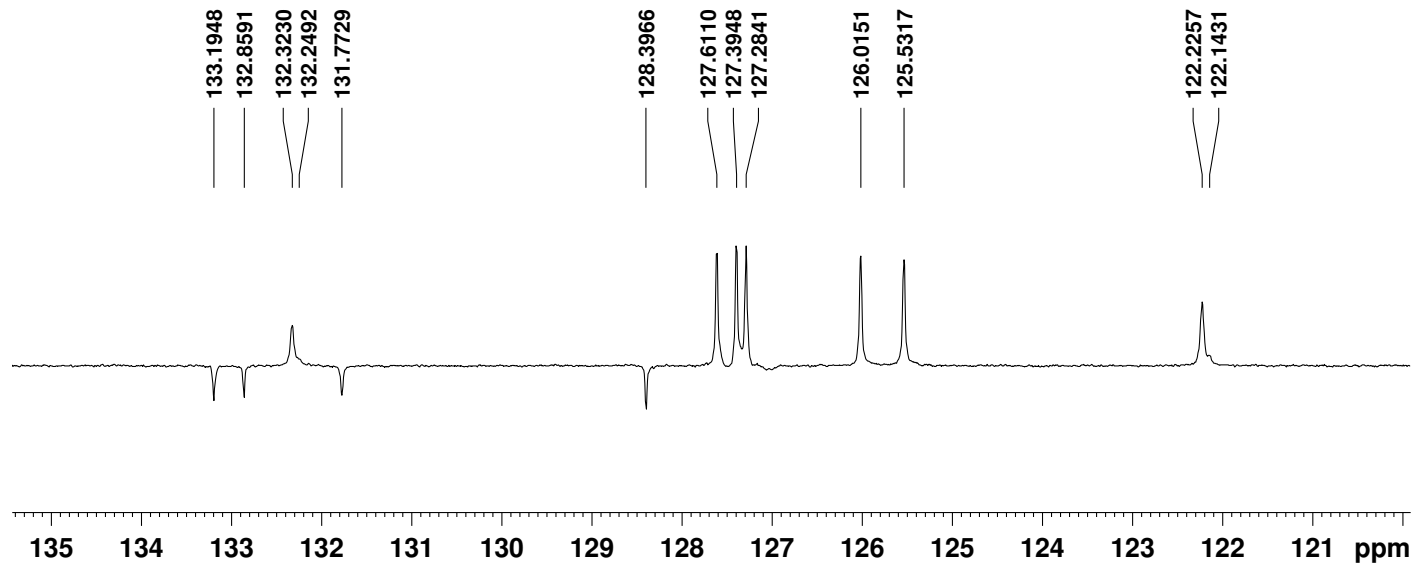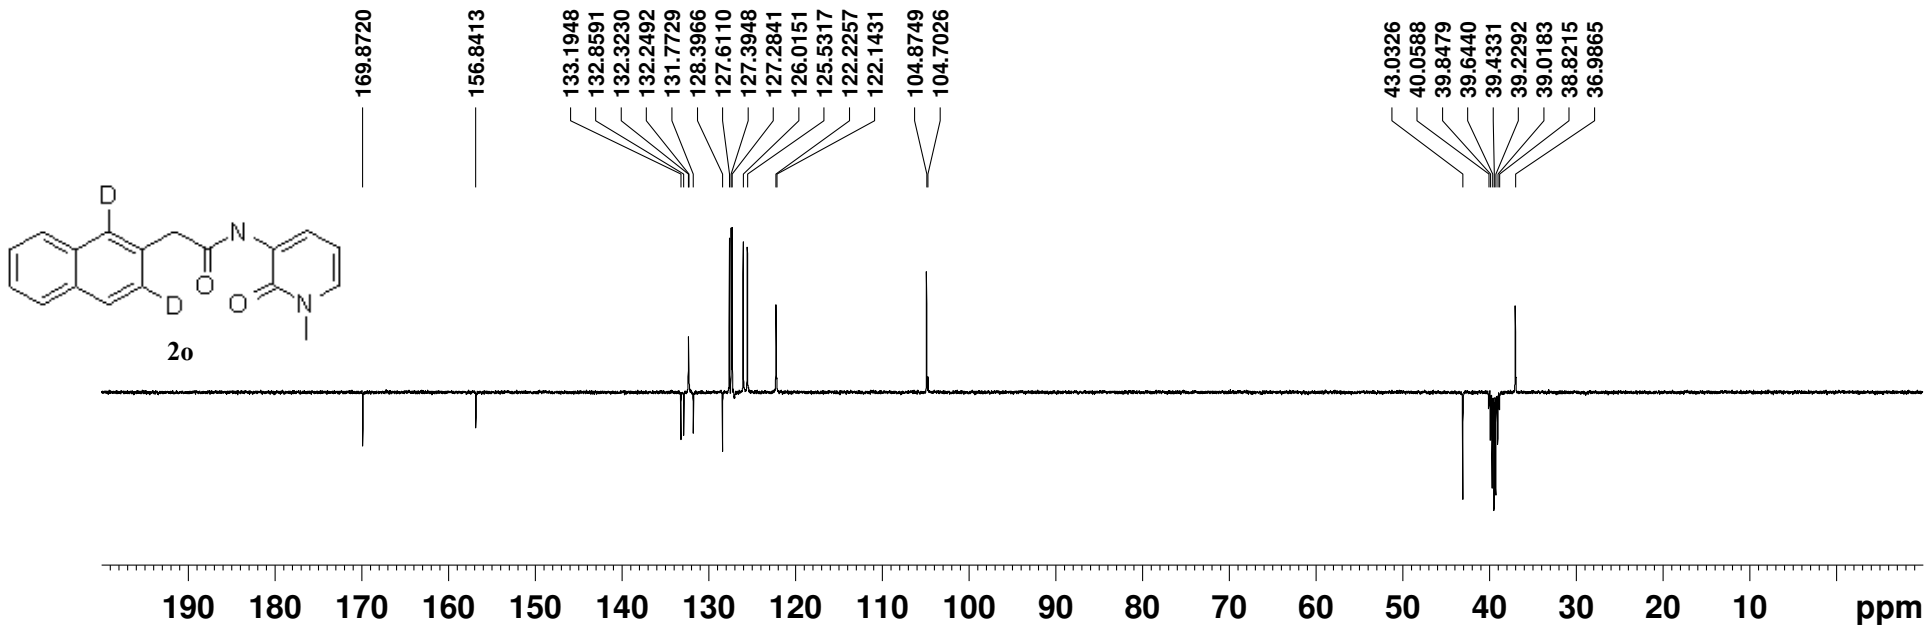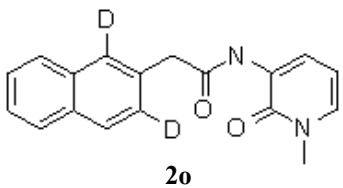

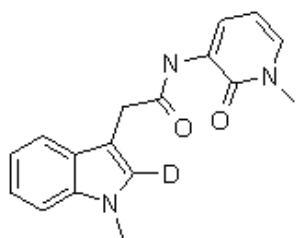

2p

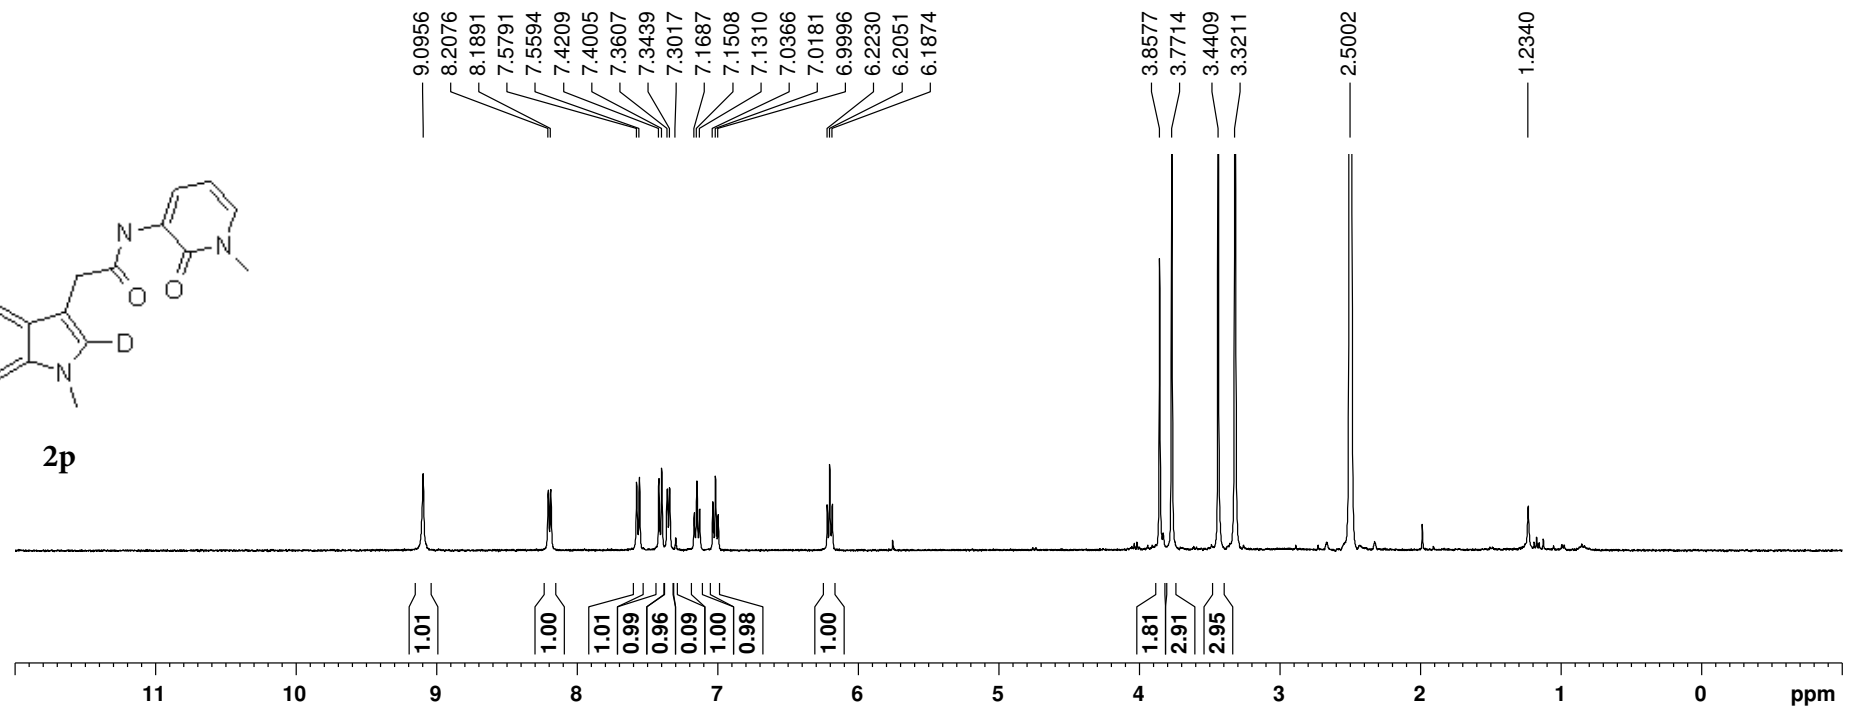

<sup>1</sup>H NMR of 2p IN DMSO

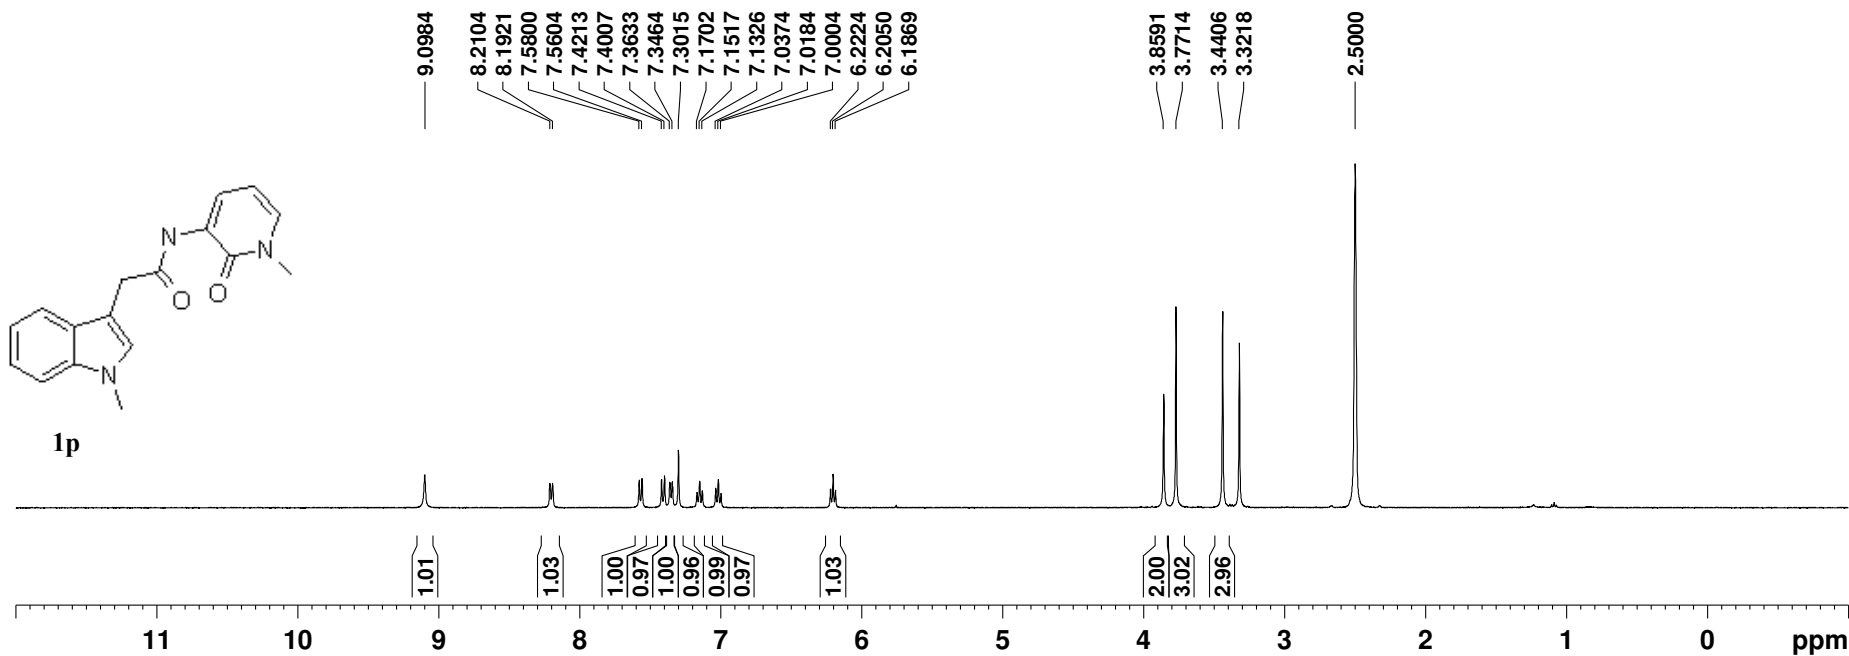

<sup>1</sup>H NMR of 1p IN DMSO

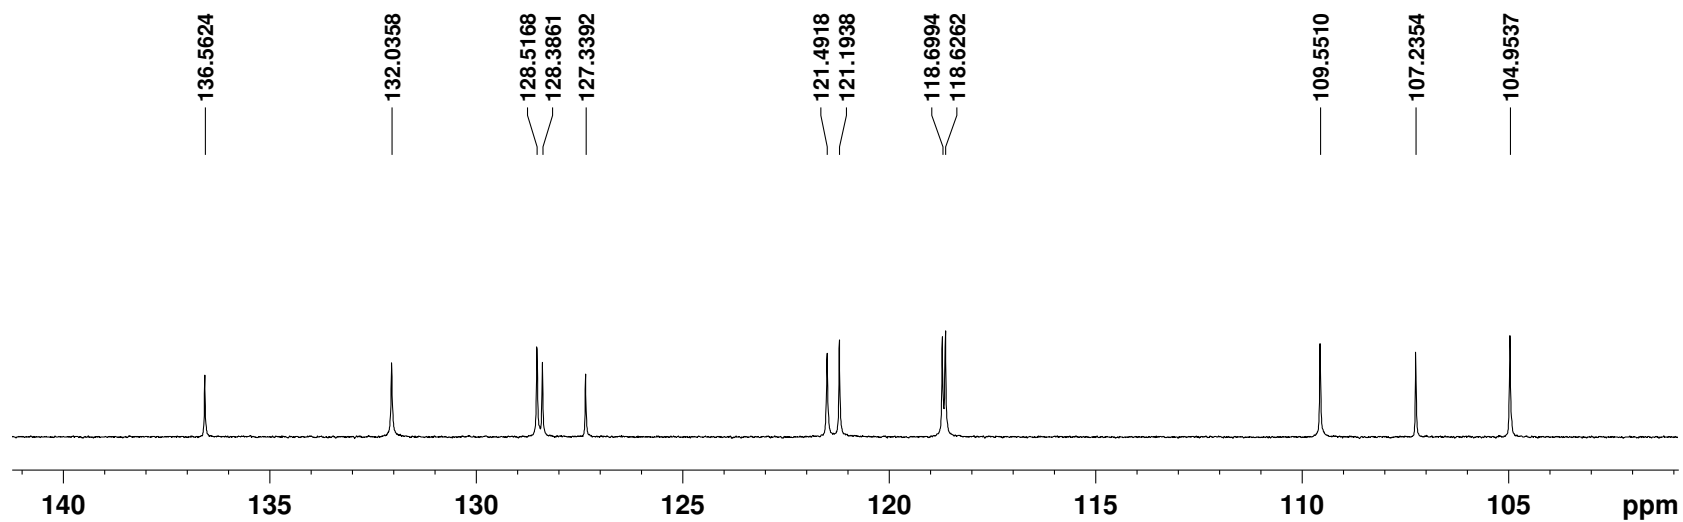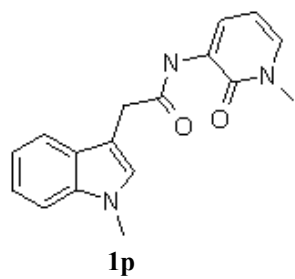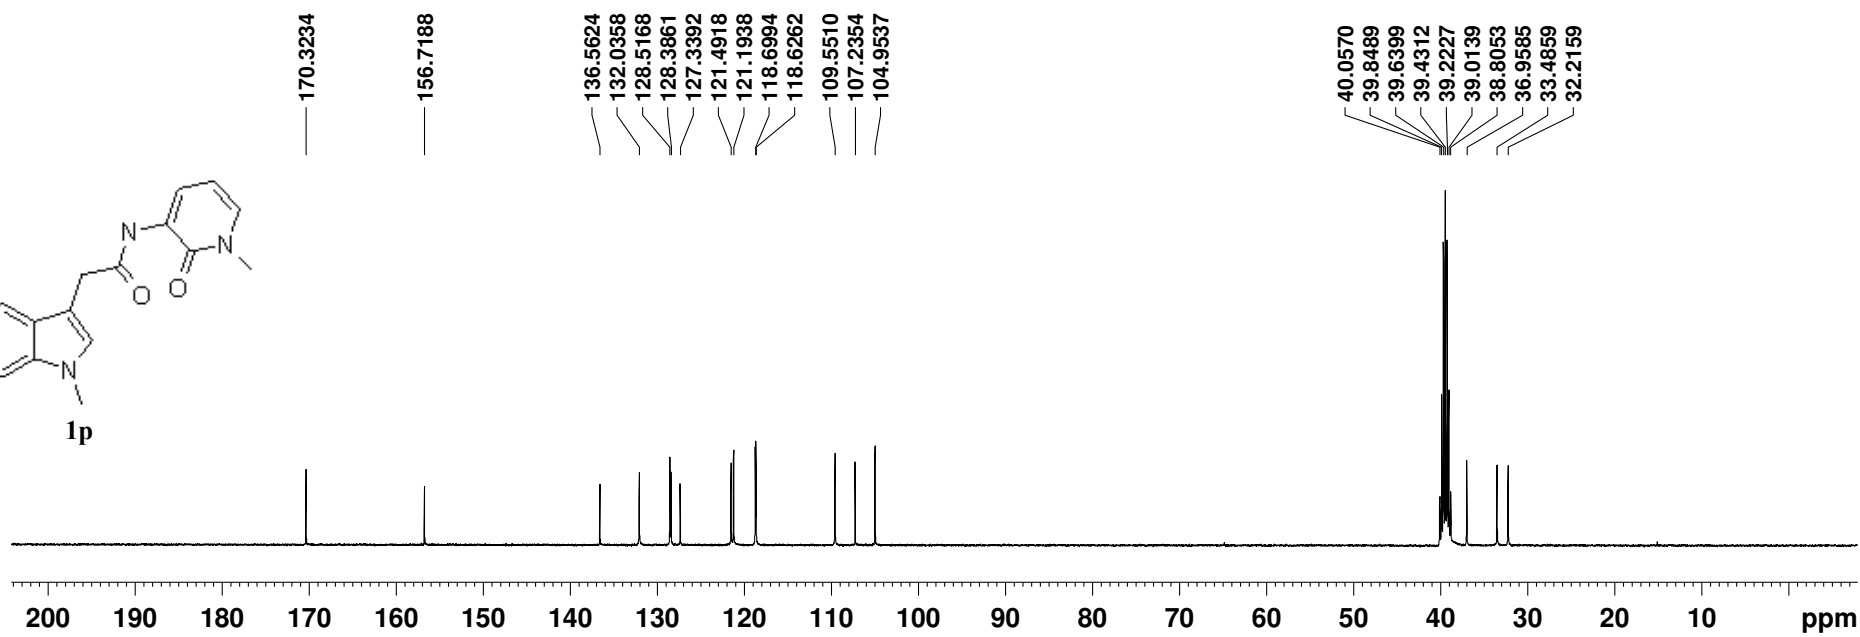

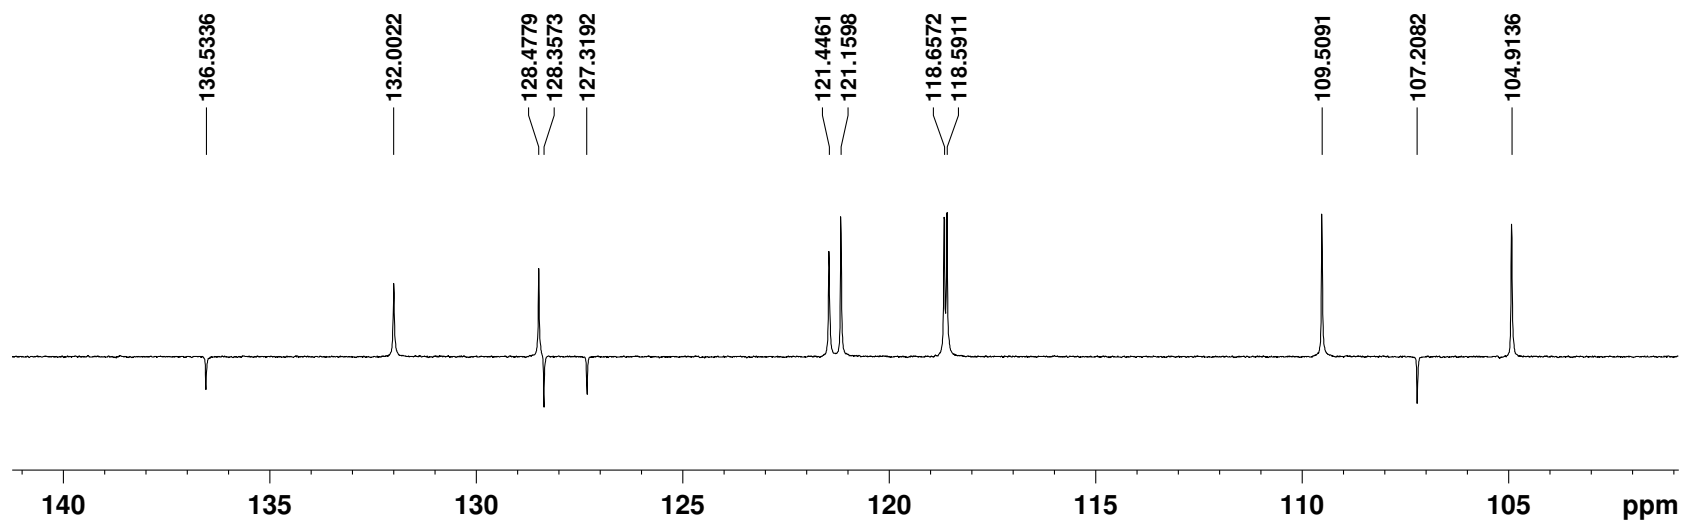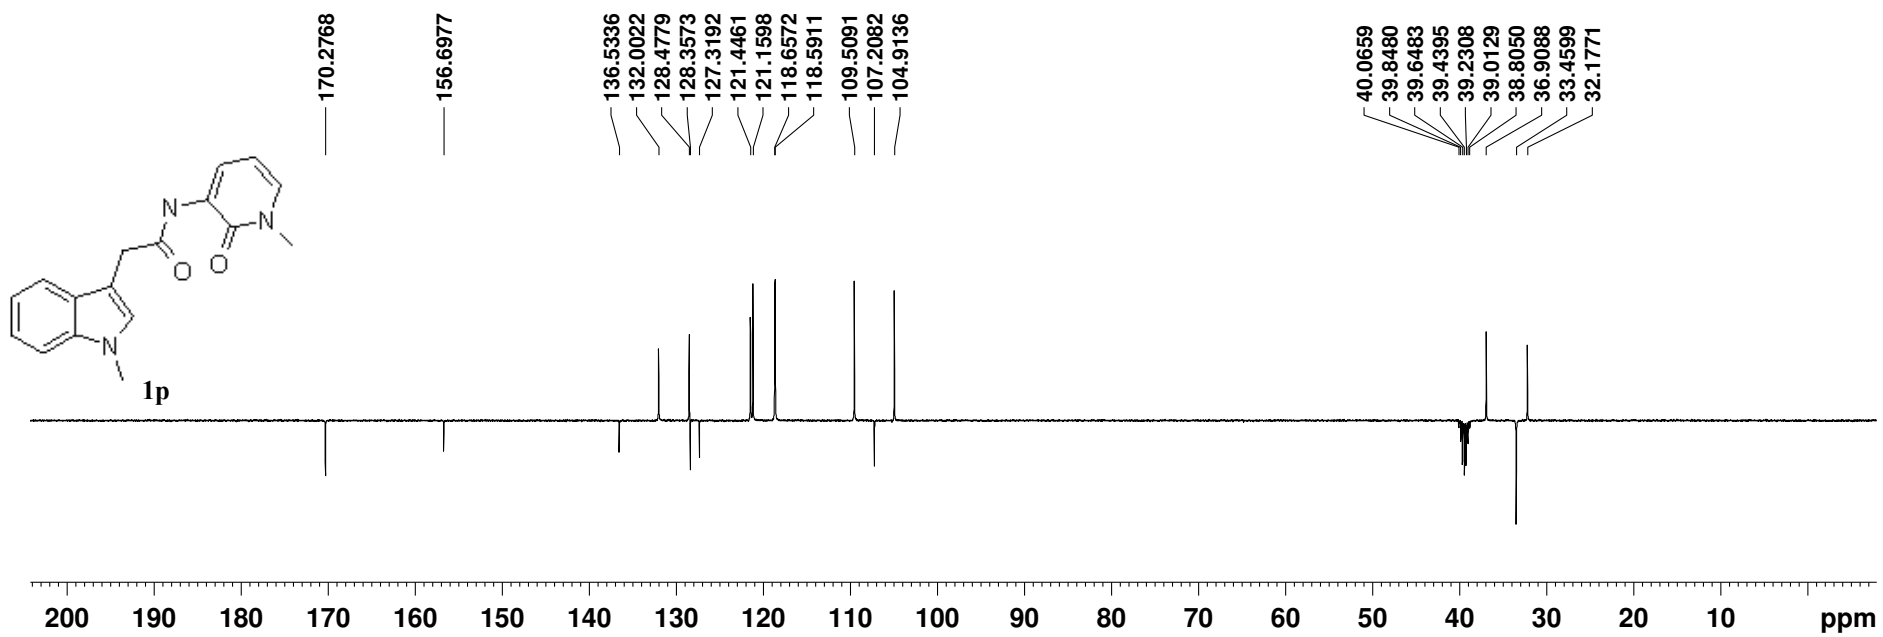

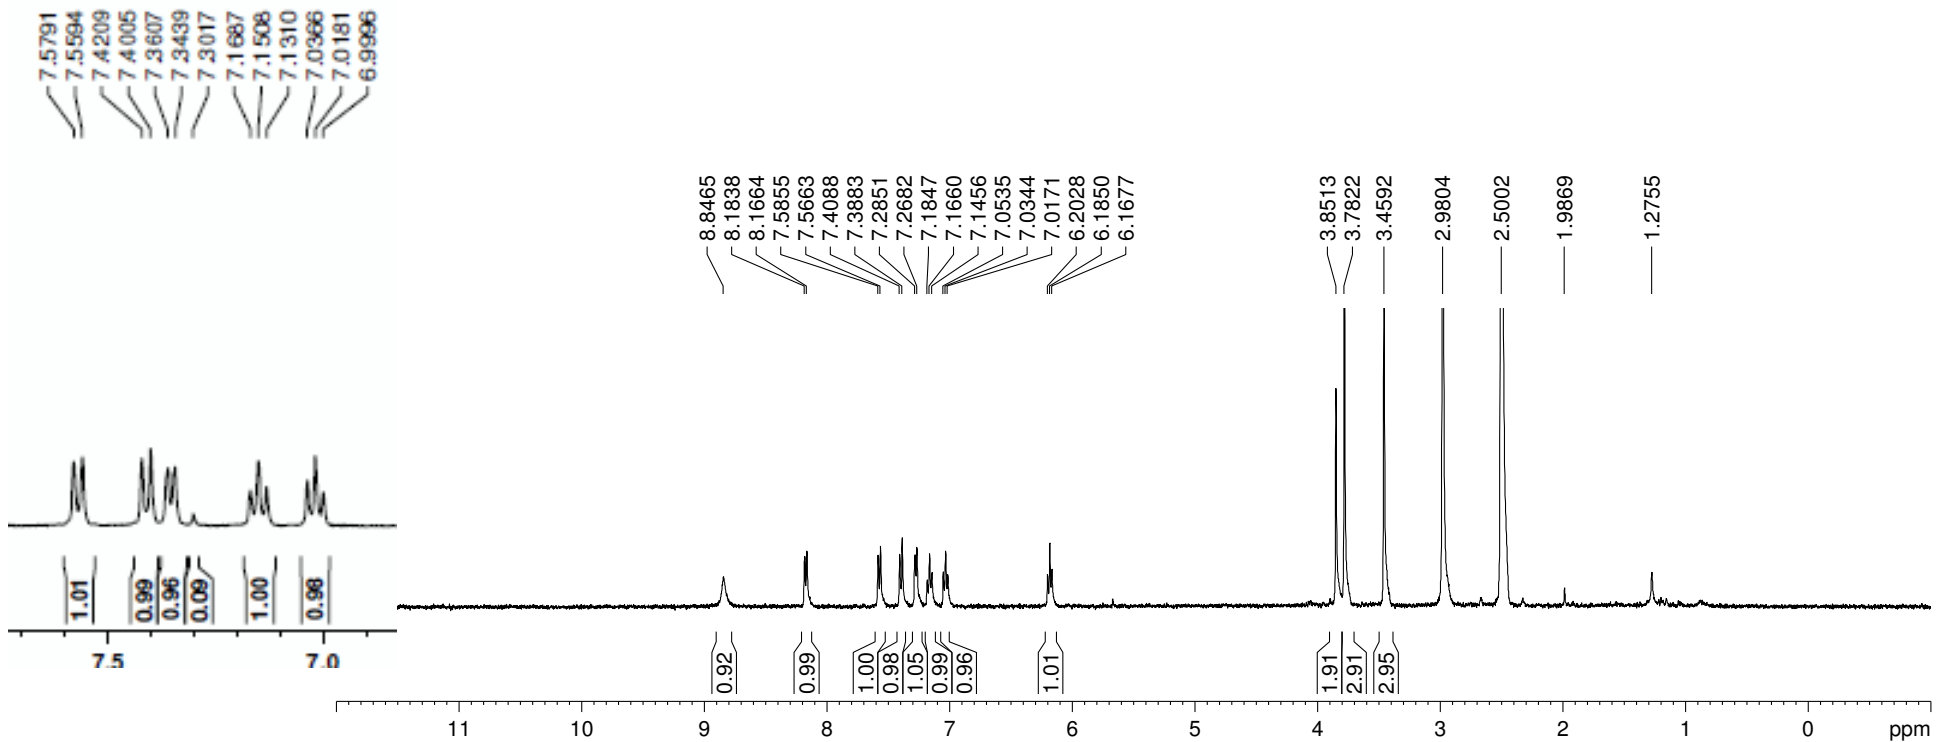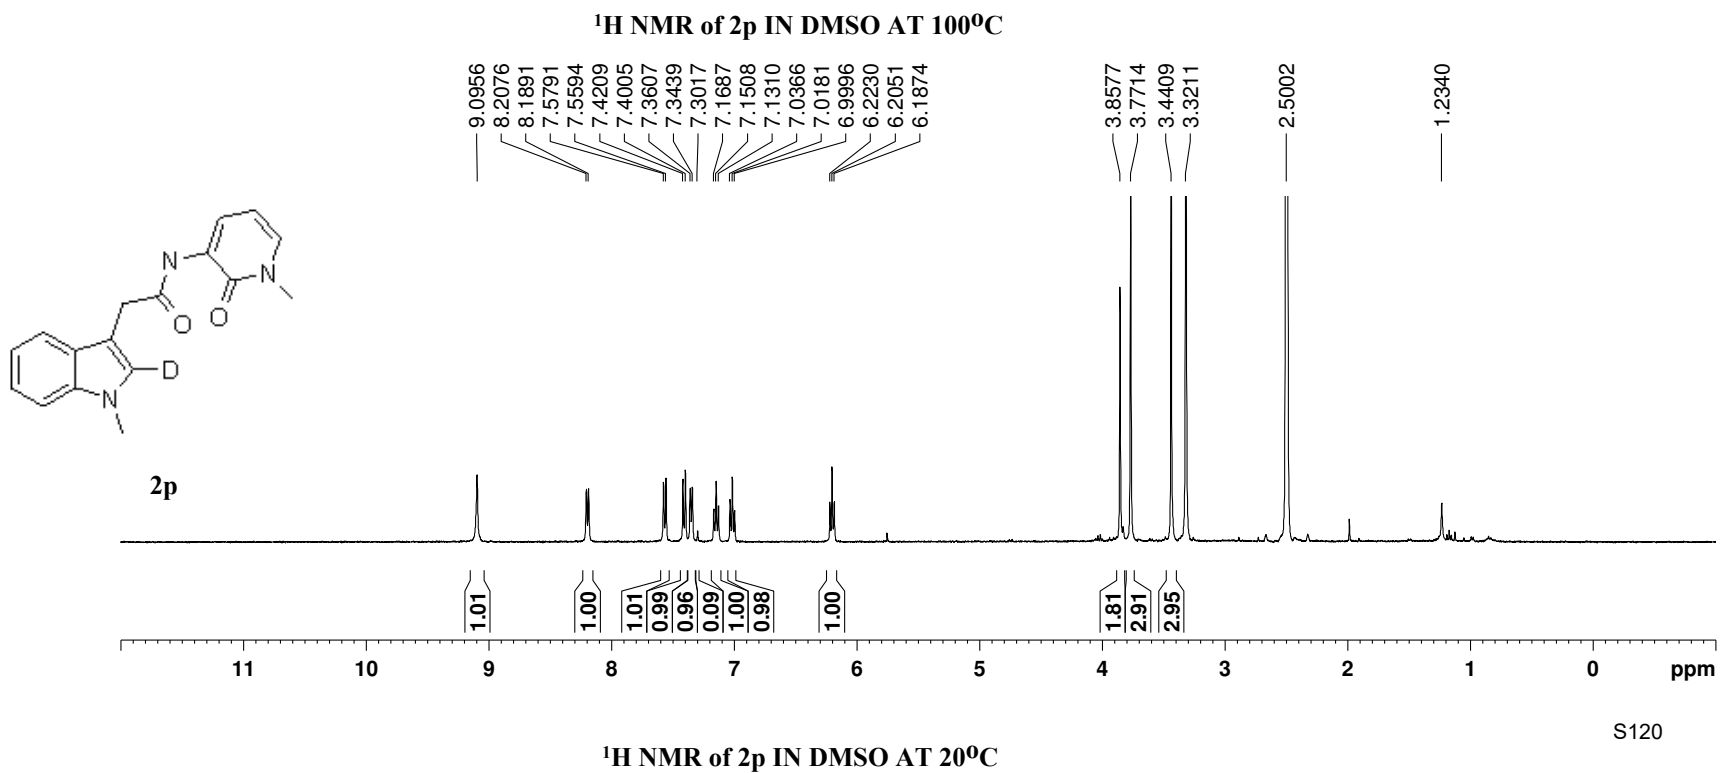



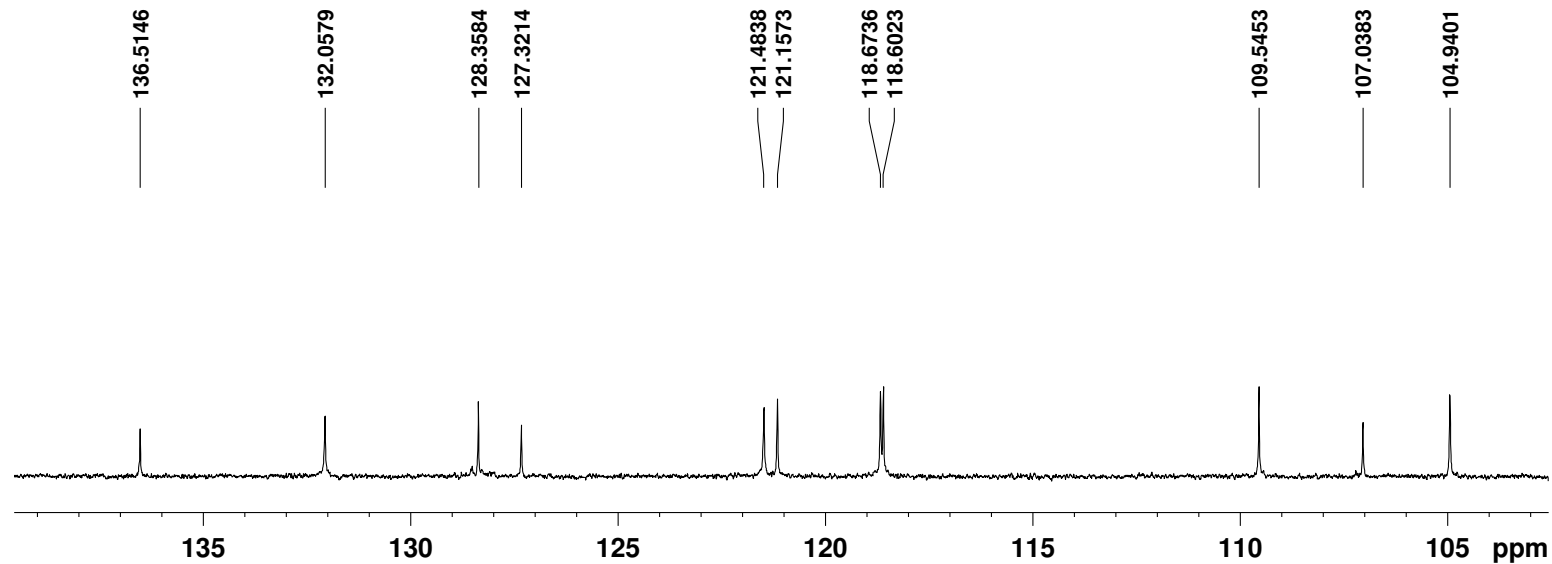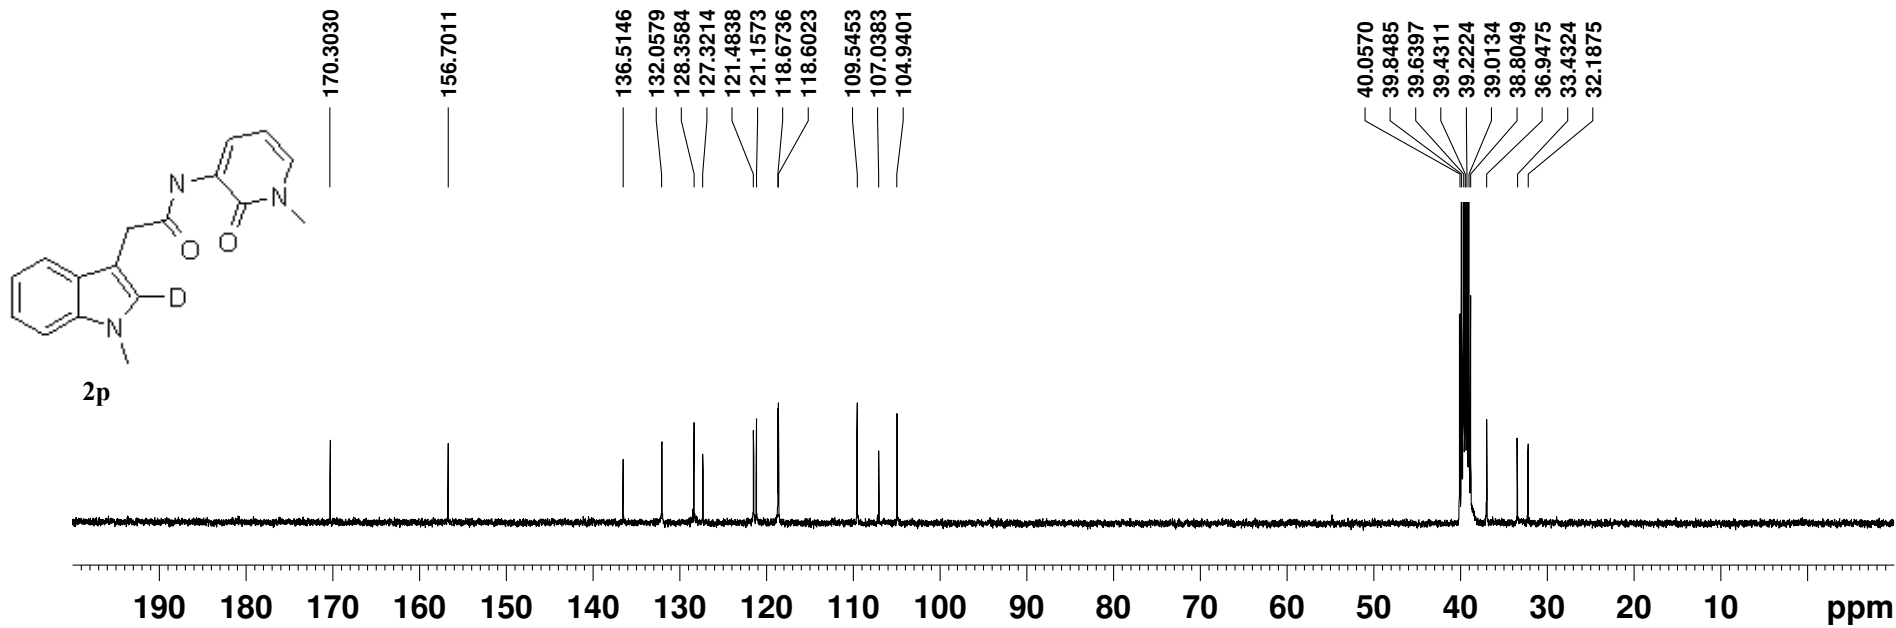

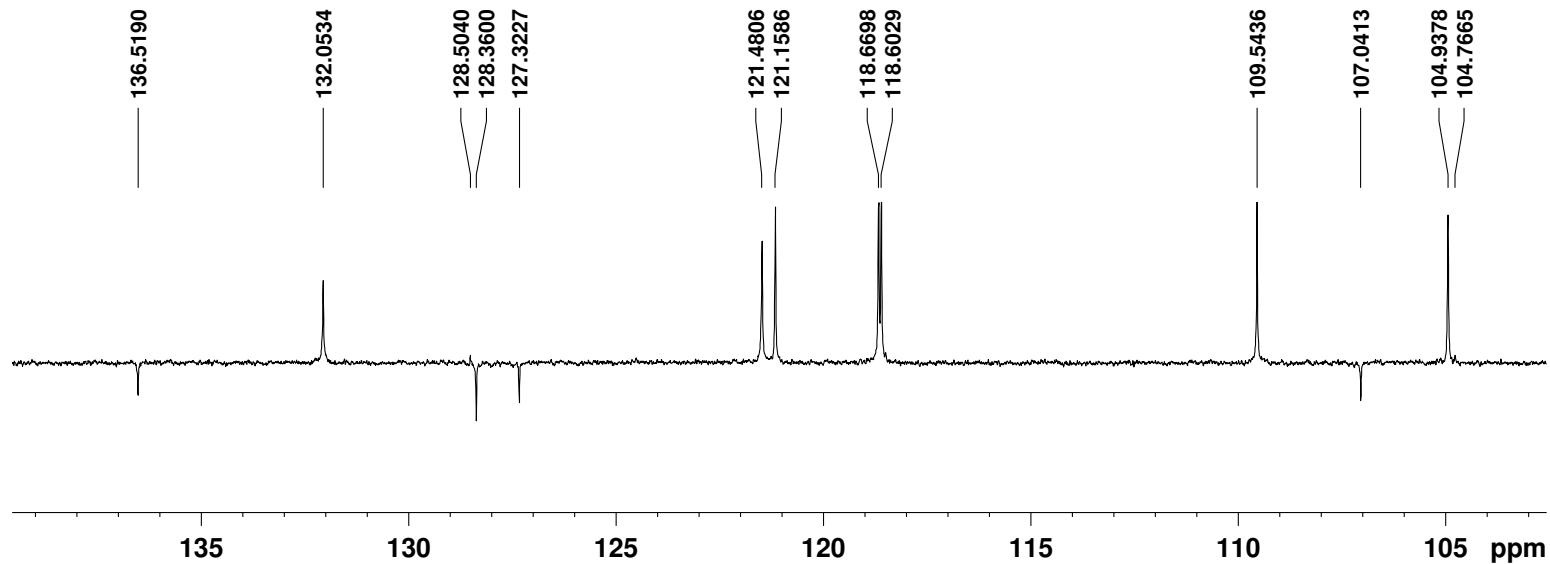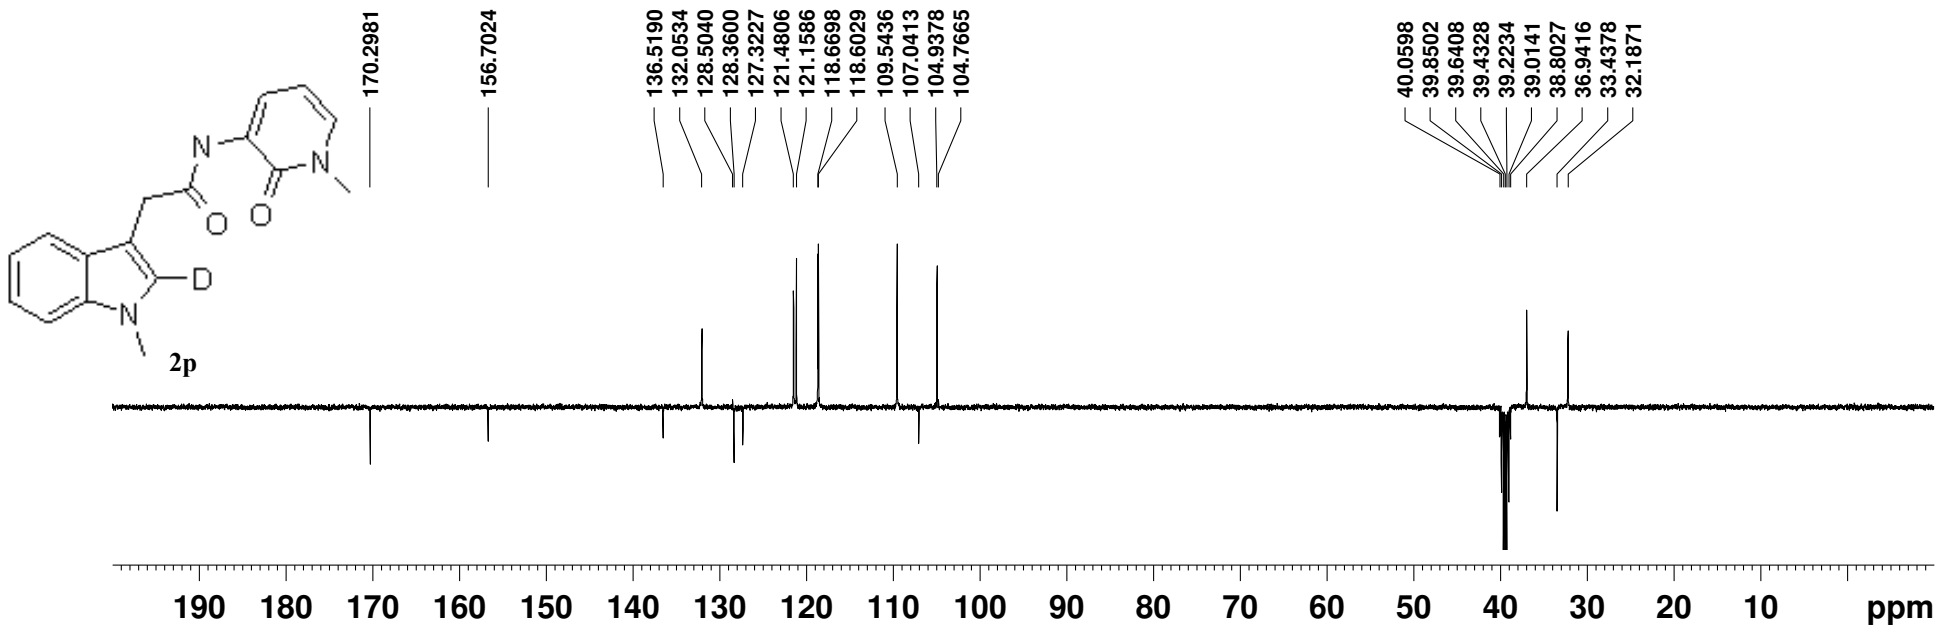

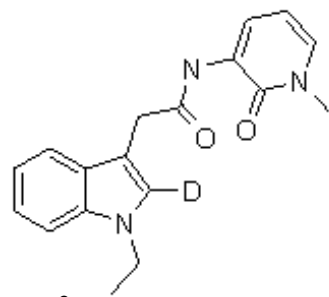

2q

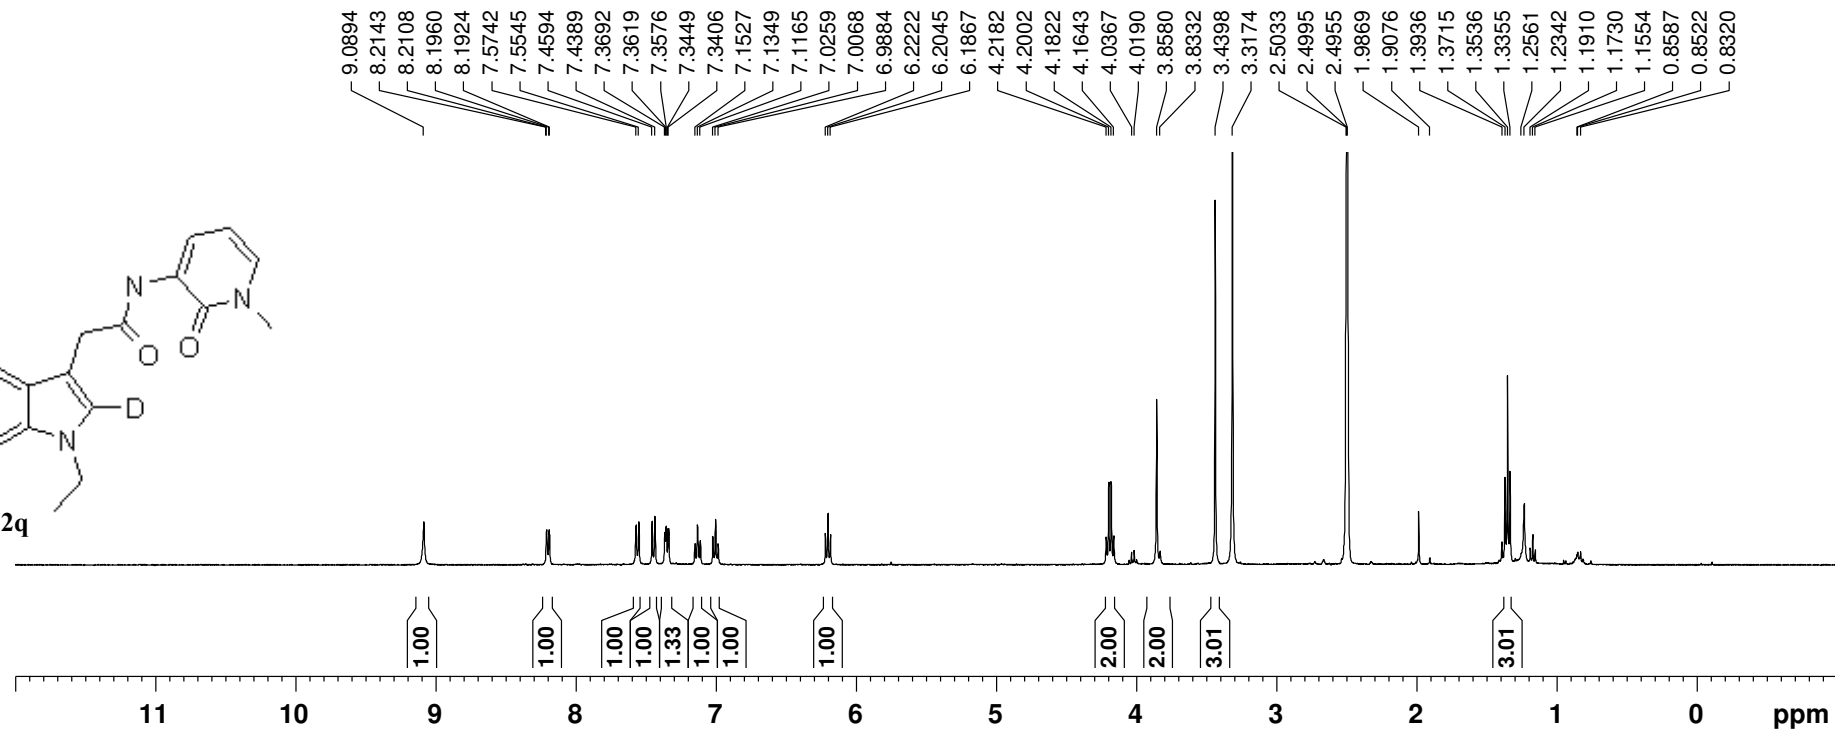

<sup>1</sup>H NMR of 2q IN DMSO

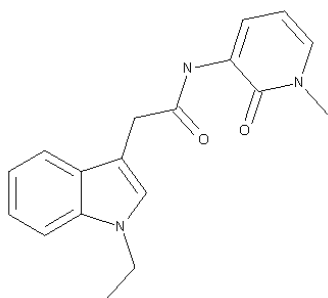

1q

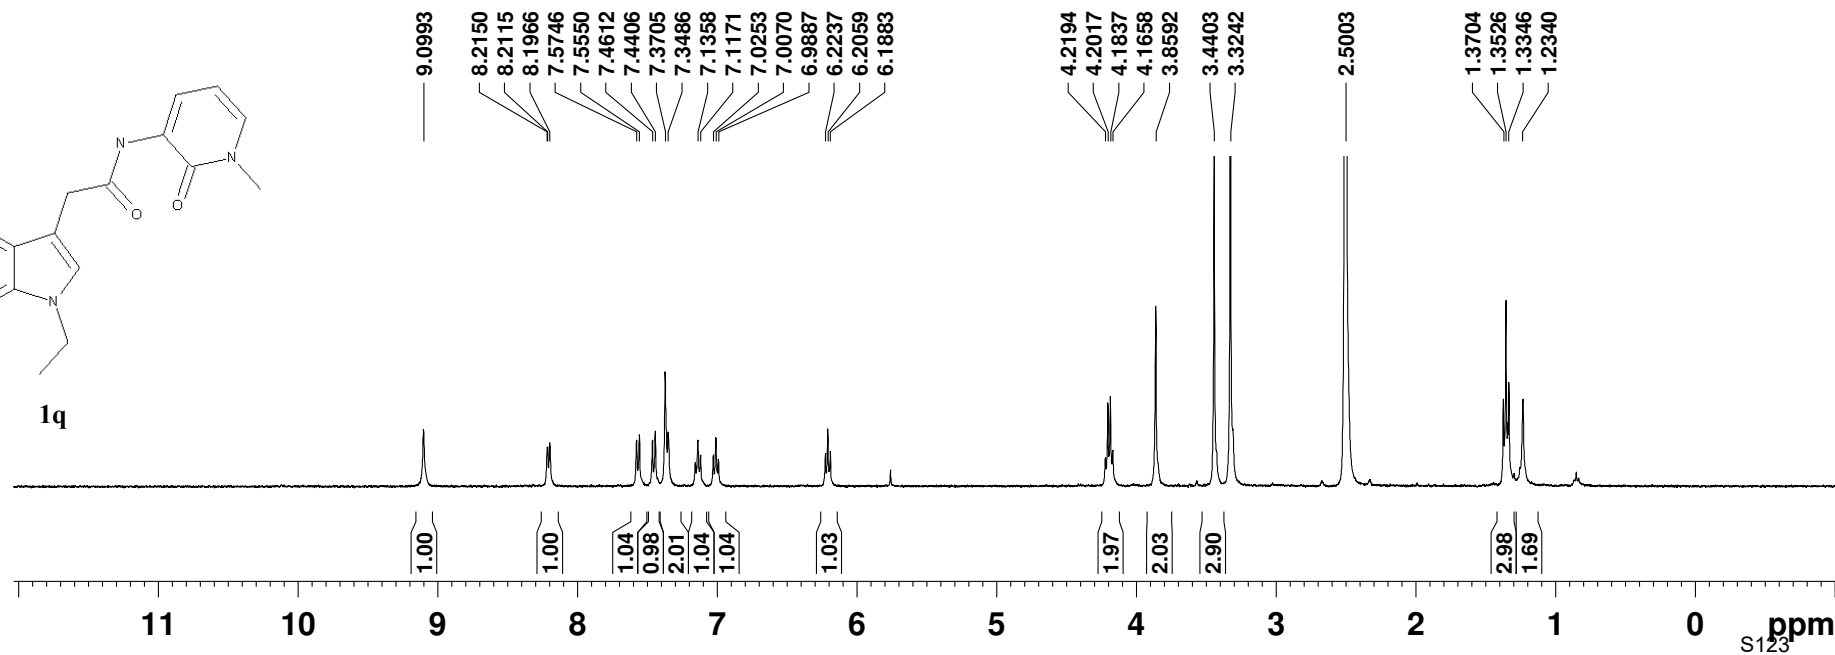

<sup>1</sup>H NMR of 1q IN DMSO

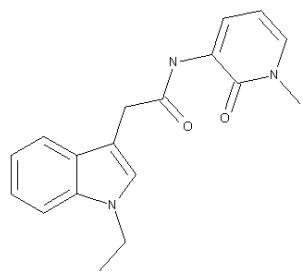

1q

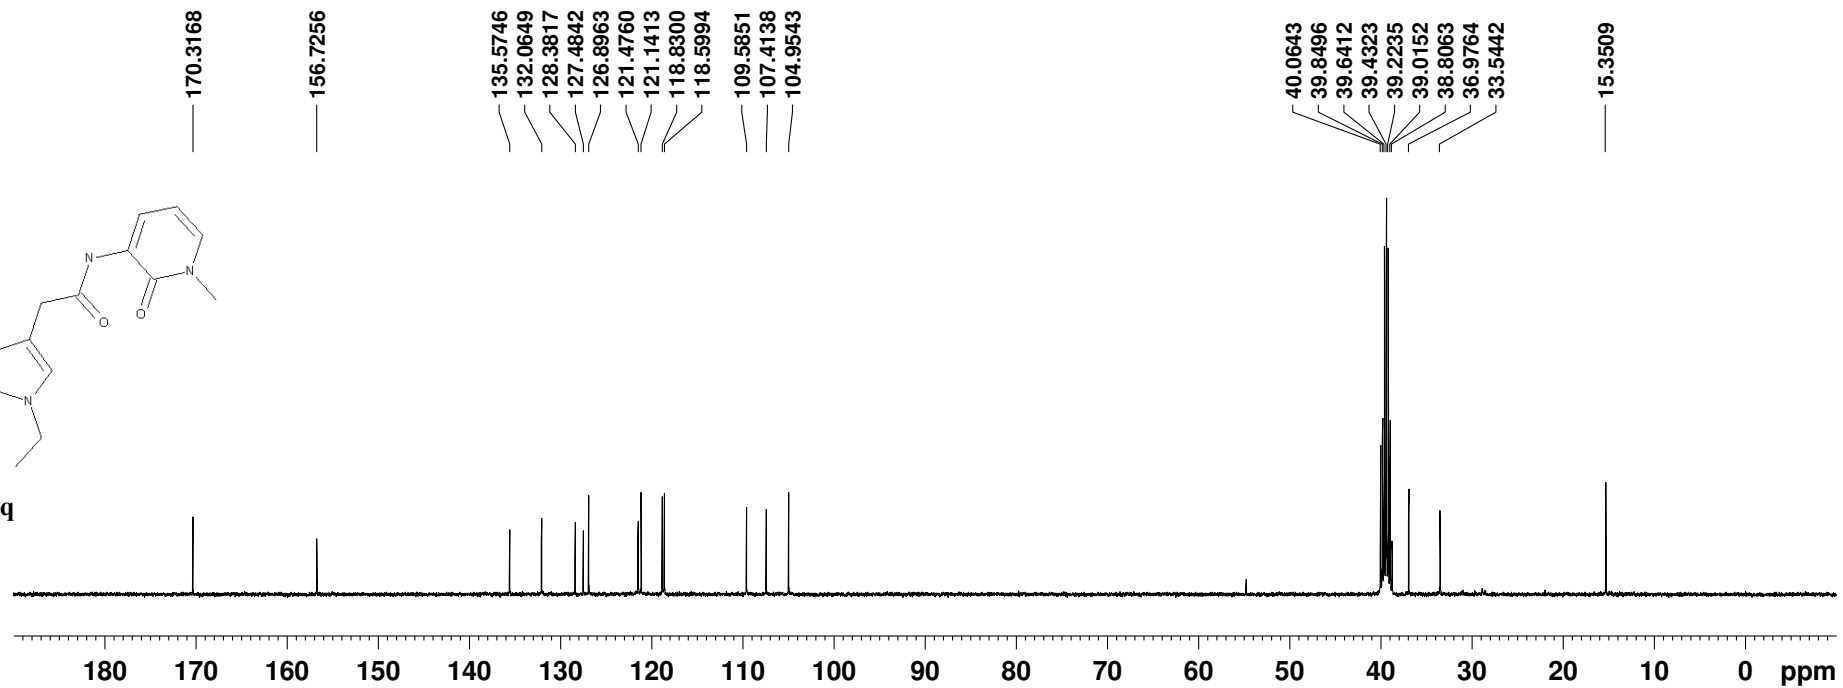

<sup>13</sup>C NMR of 1q IN DMSO

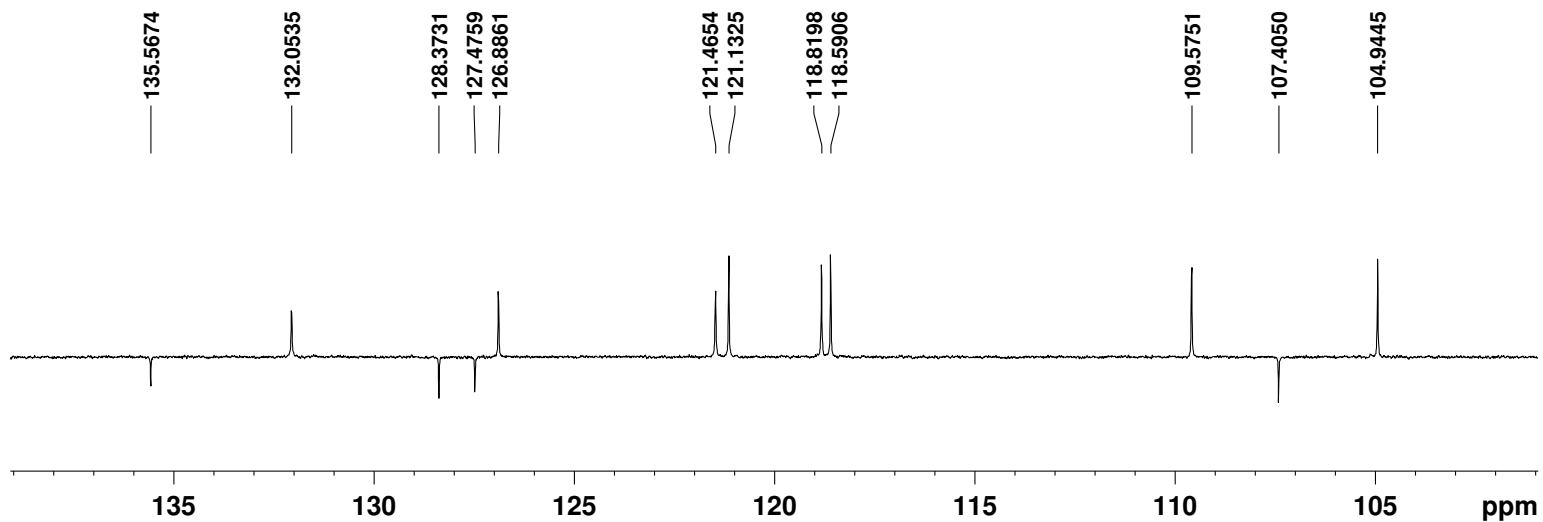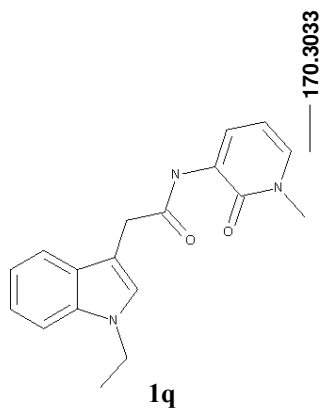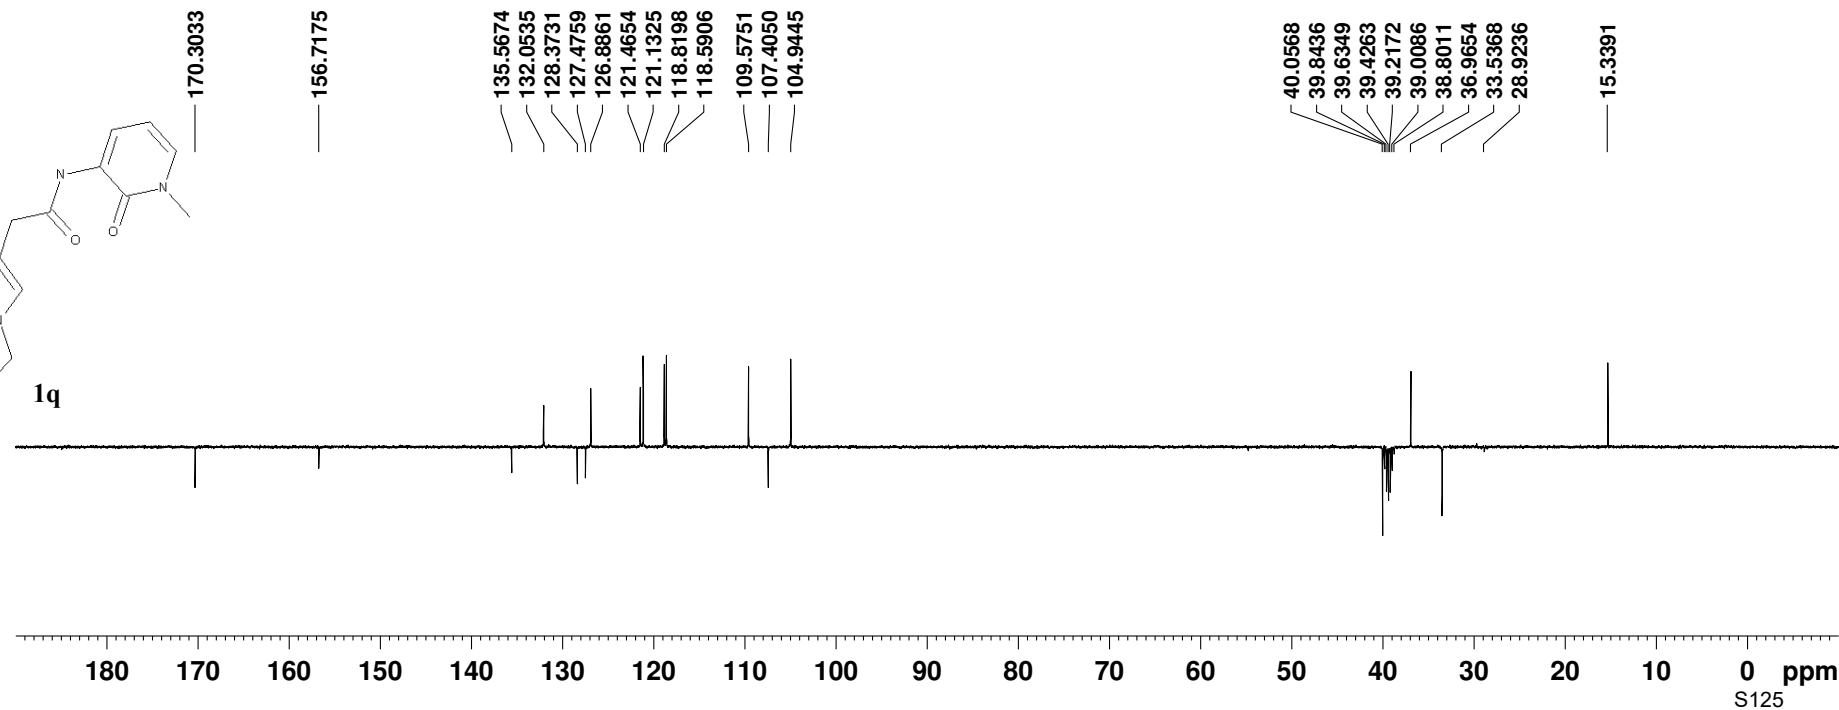

APT of 1q IN DMSO

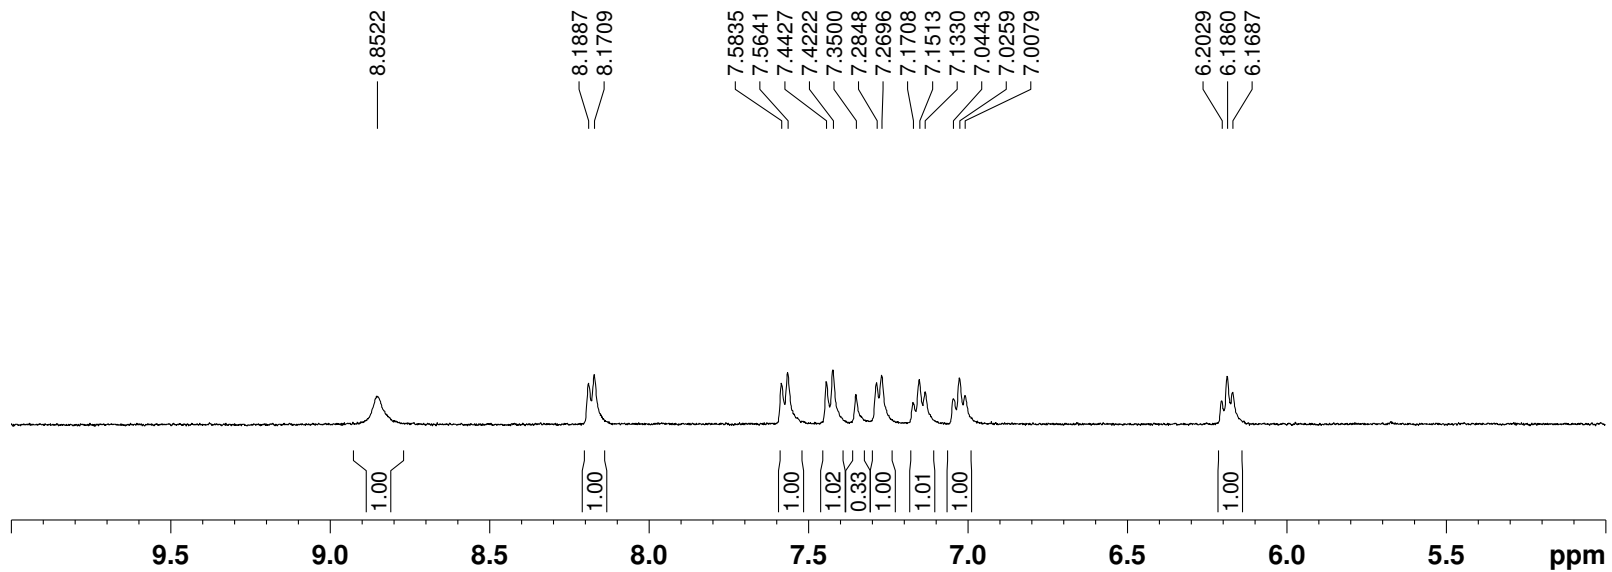

<sup>1</sup>H NMR of 2q IN DMSO AT 100°C

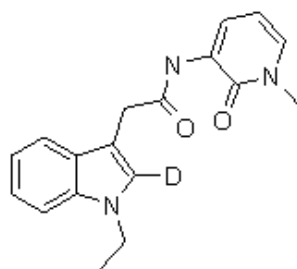

2q

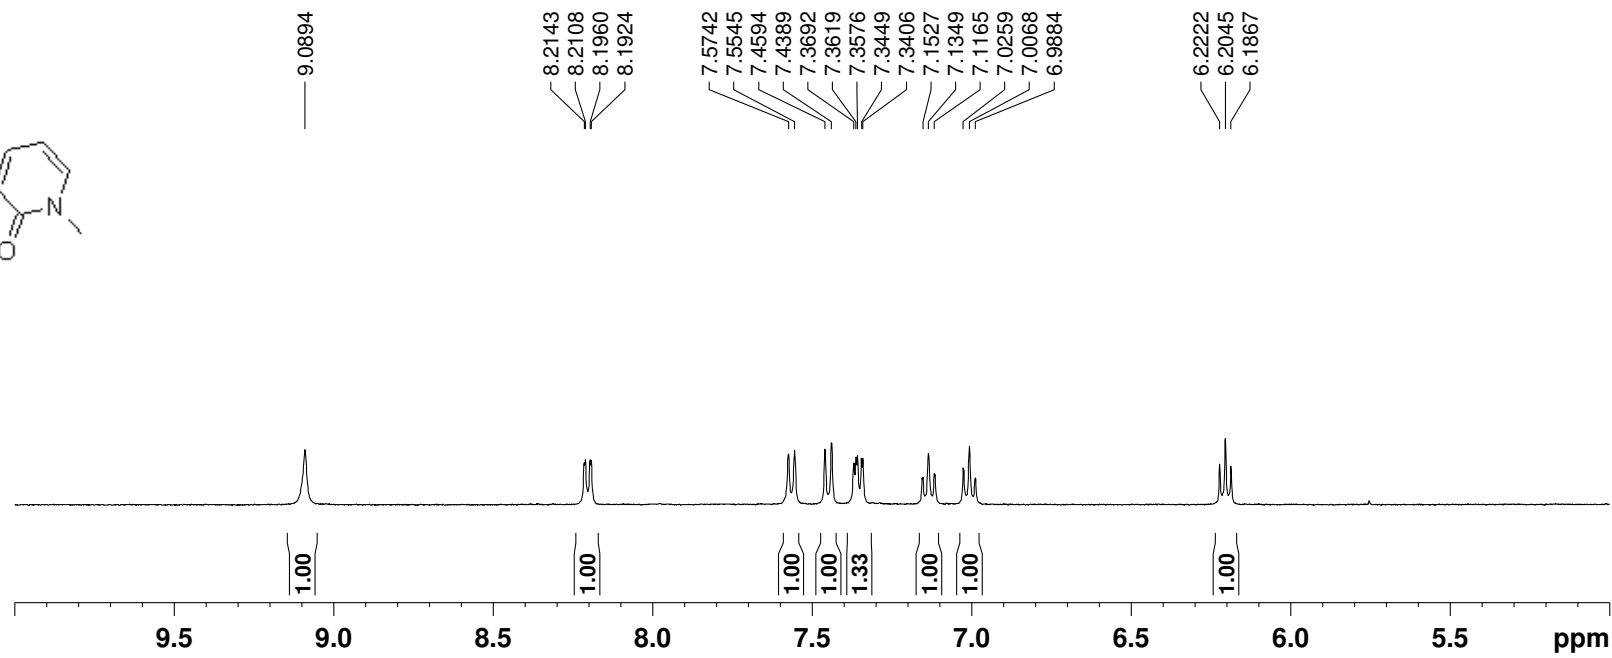

<sup>1</sup>H NMR of 2q IN DMSO AT 20°C

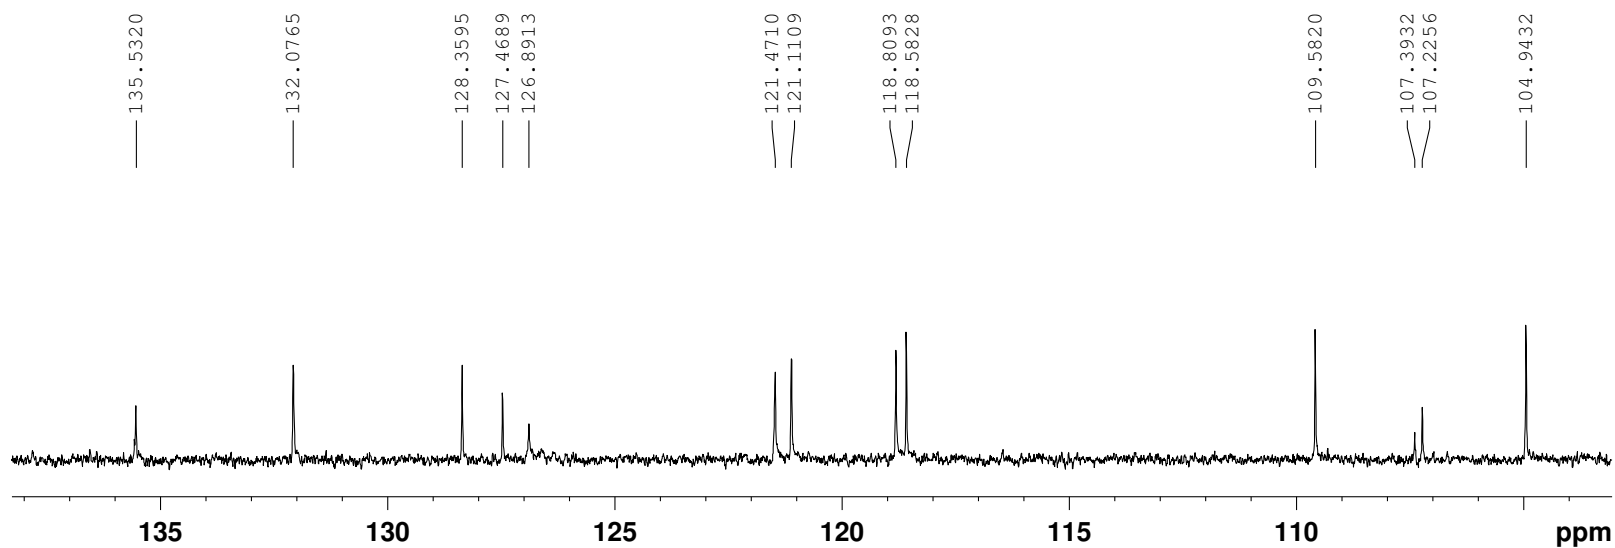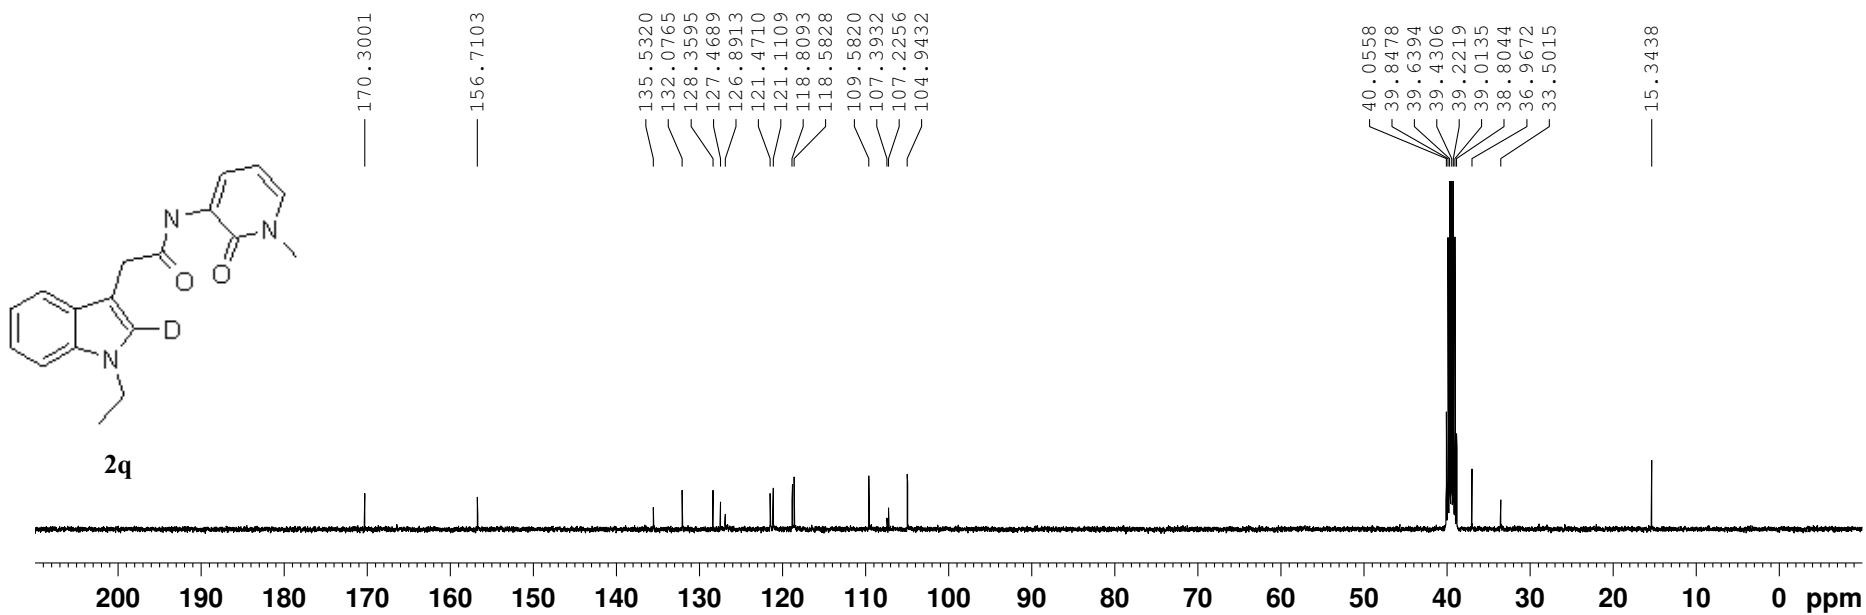

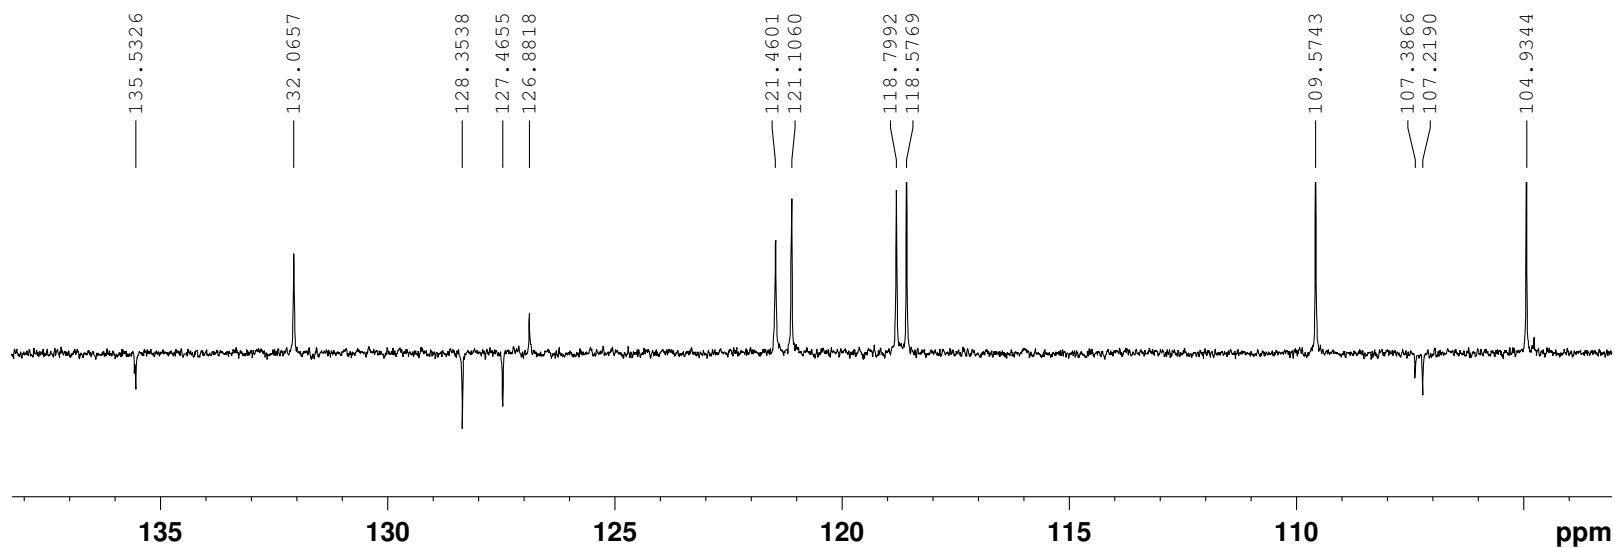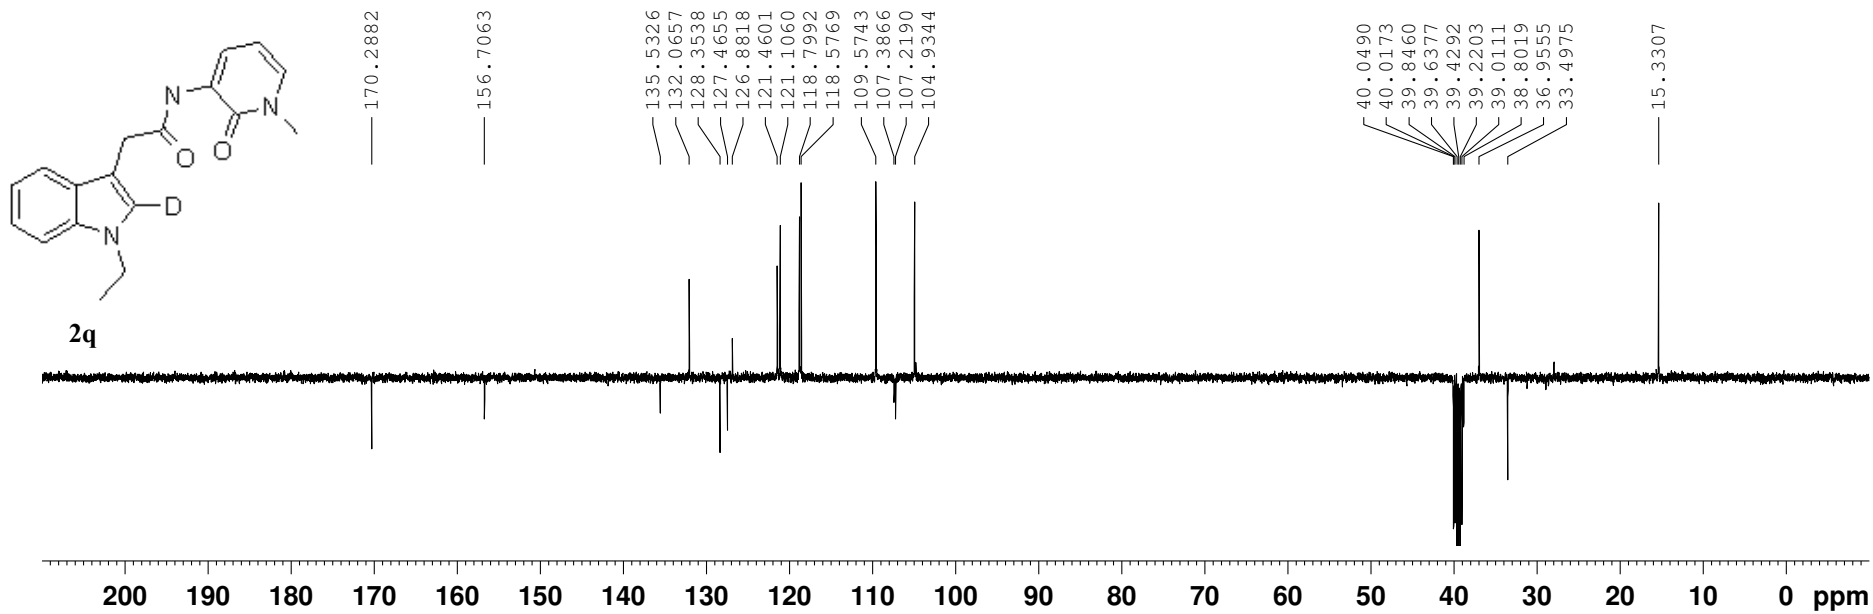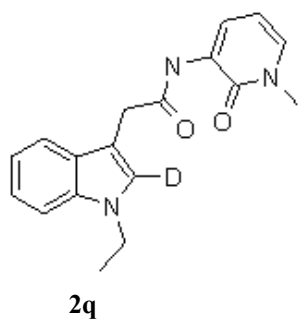



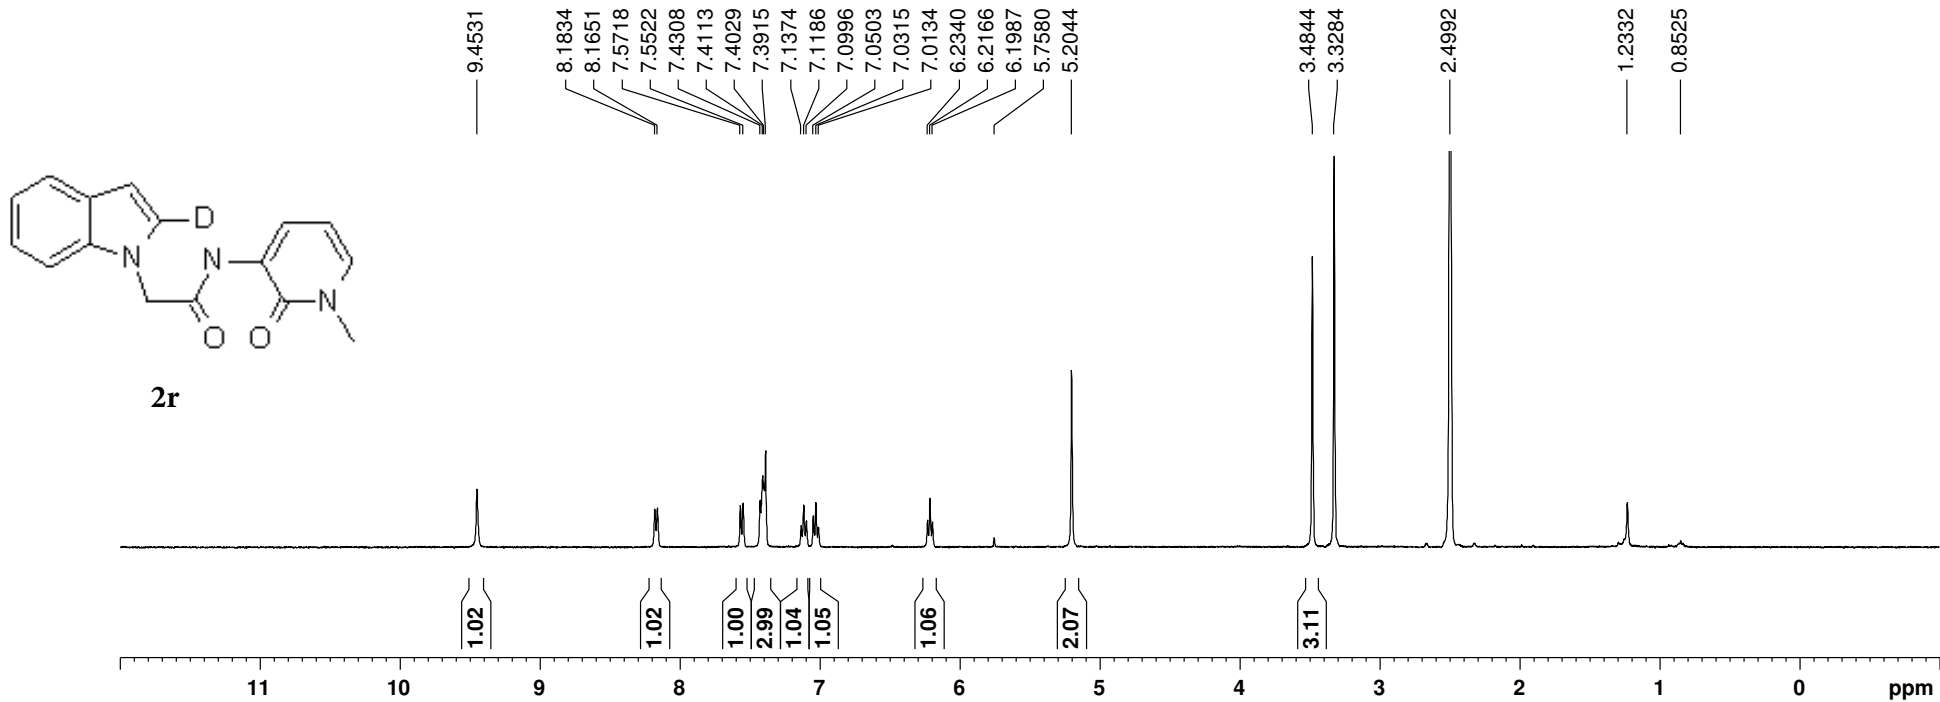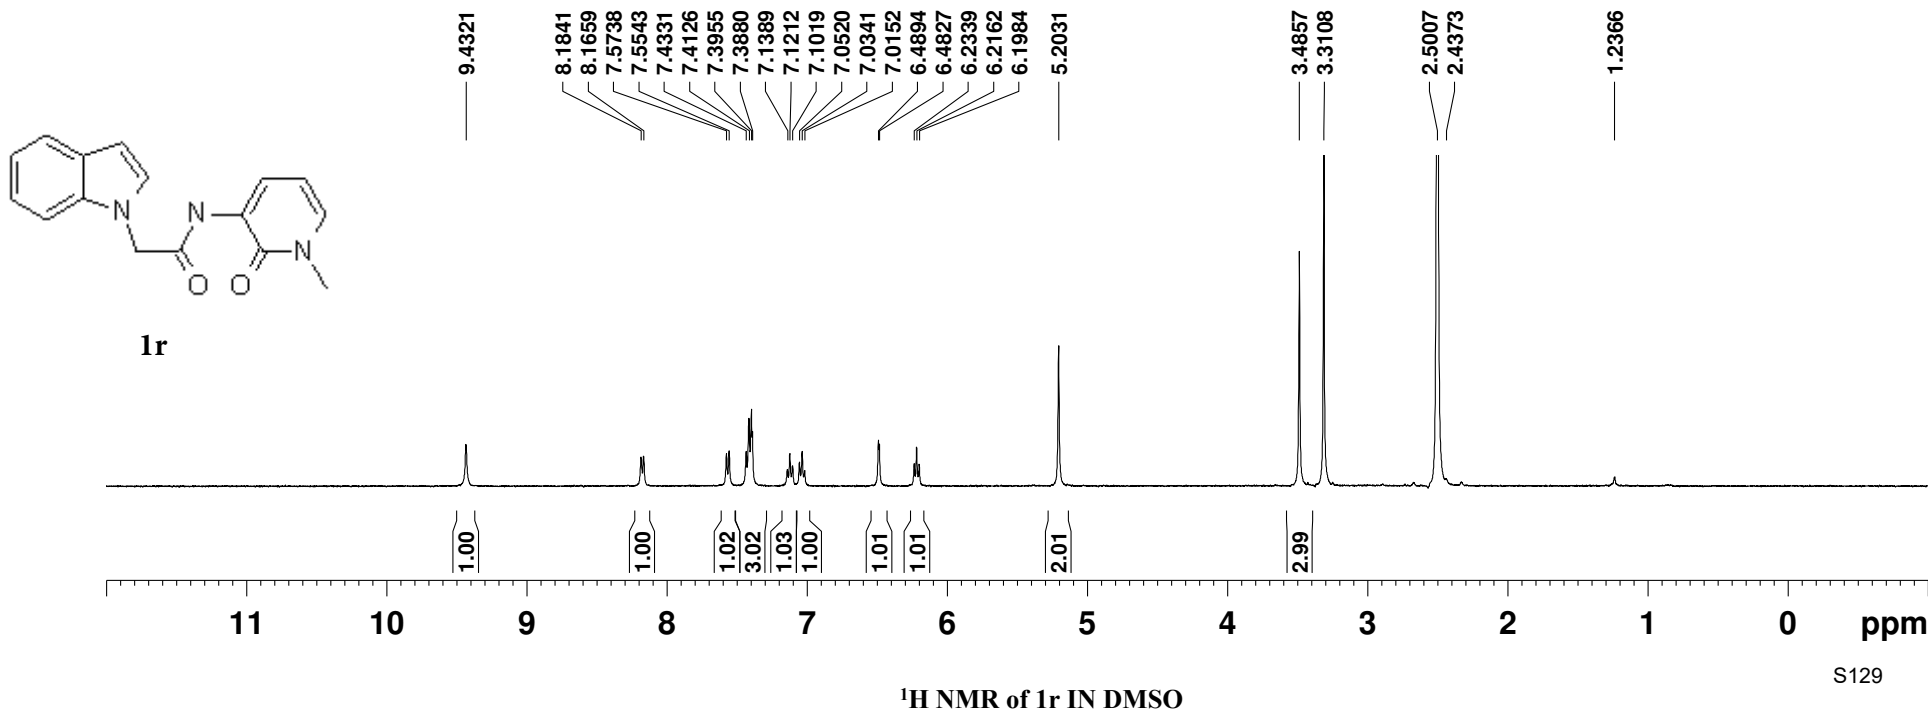

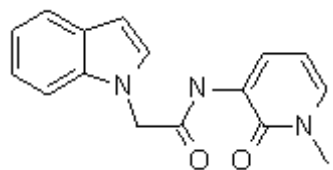

1r

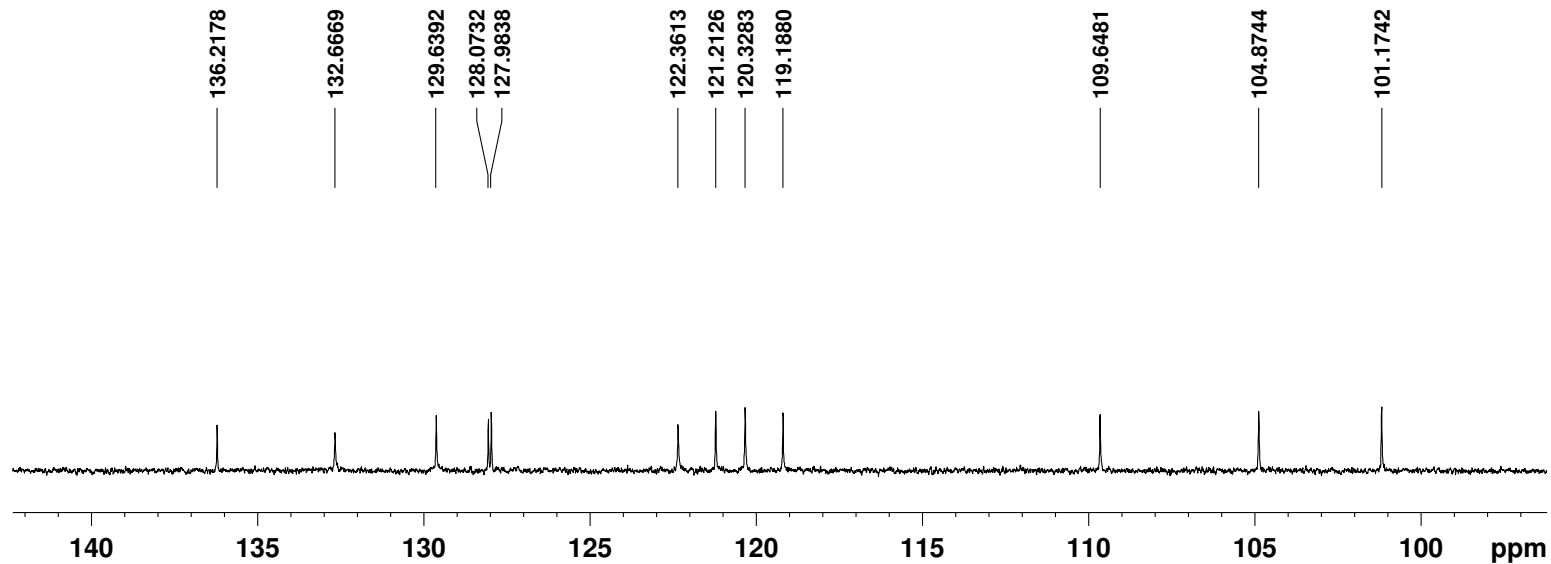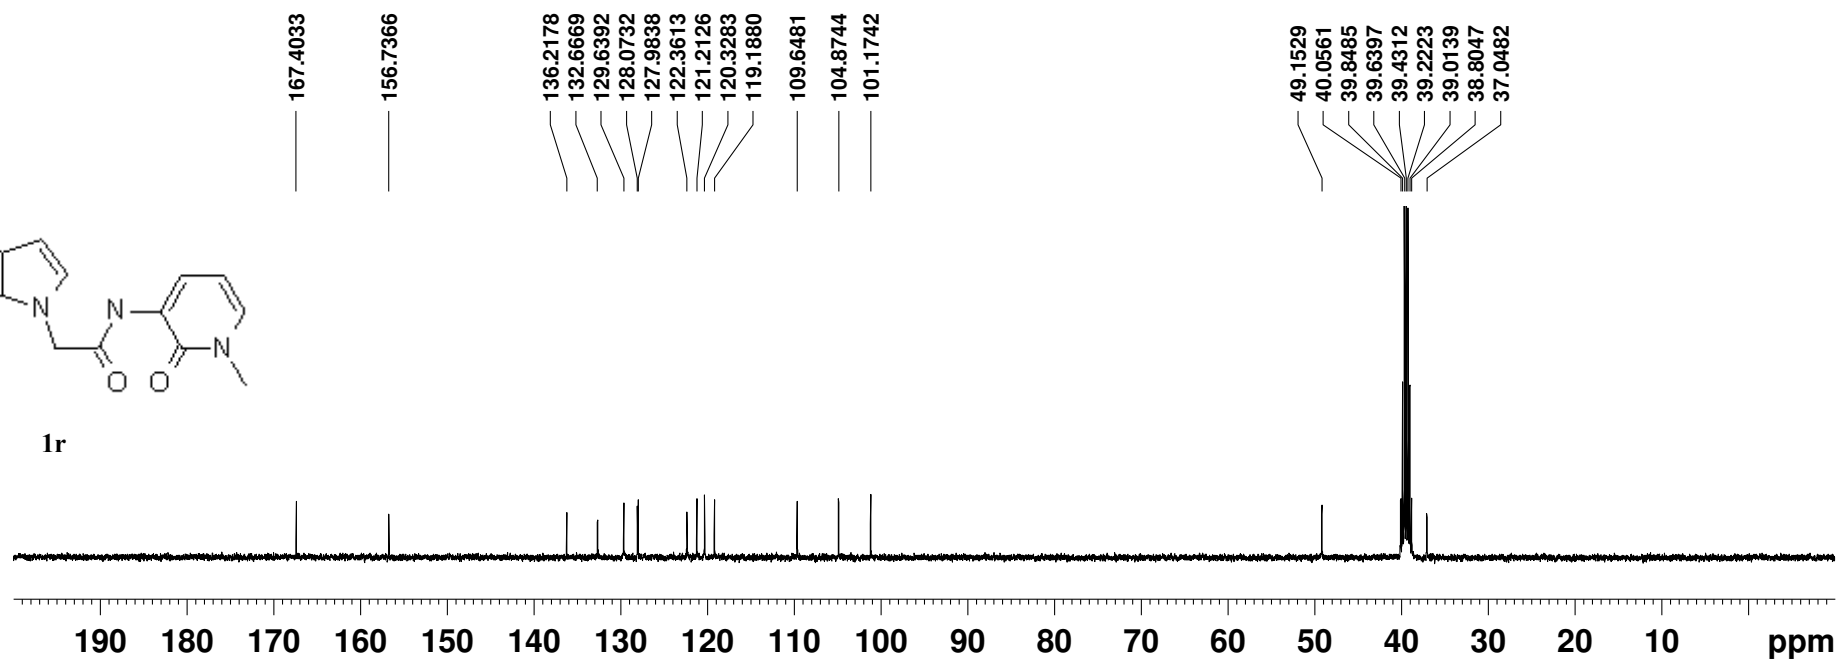

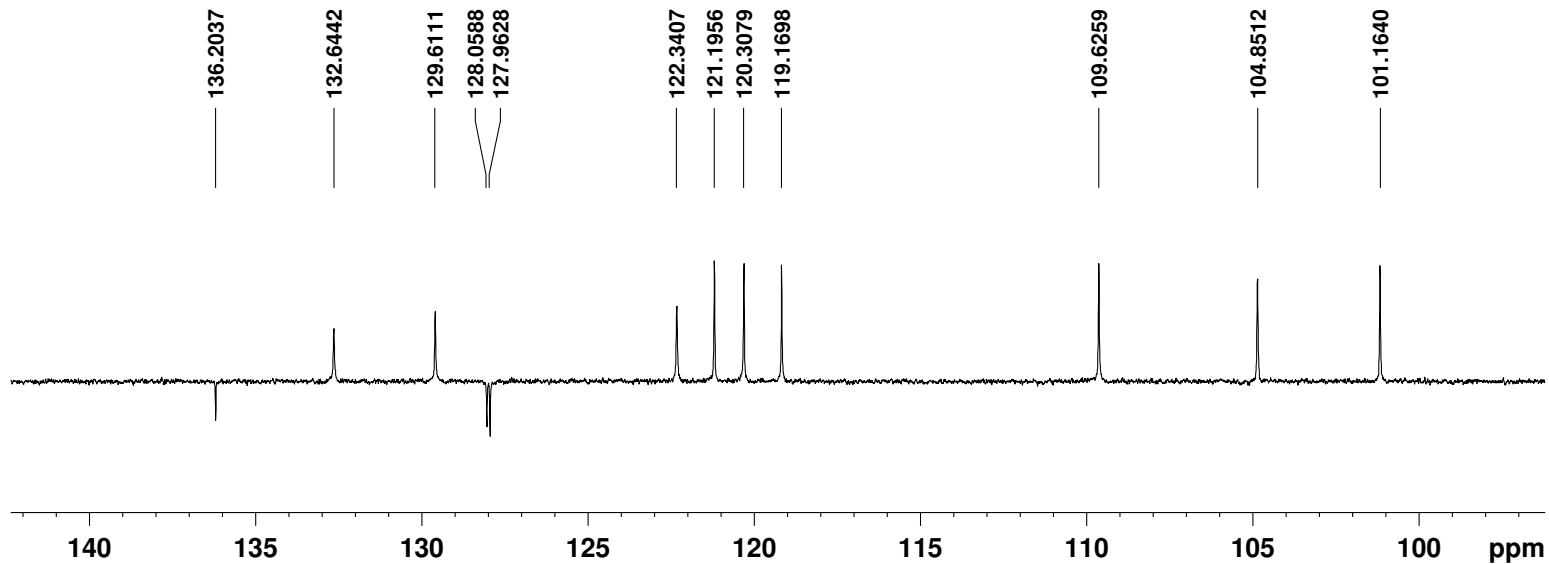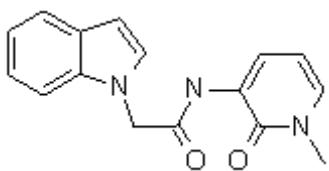

1r

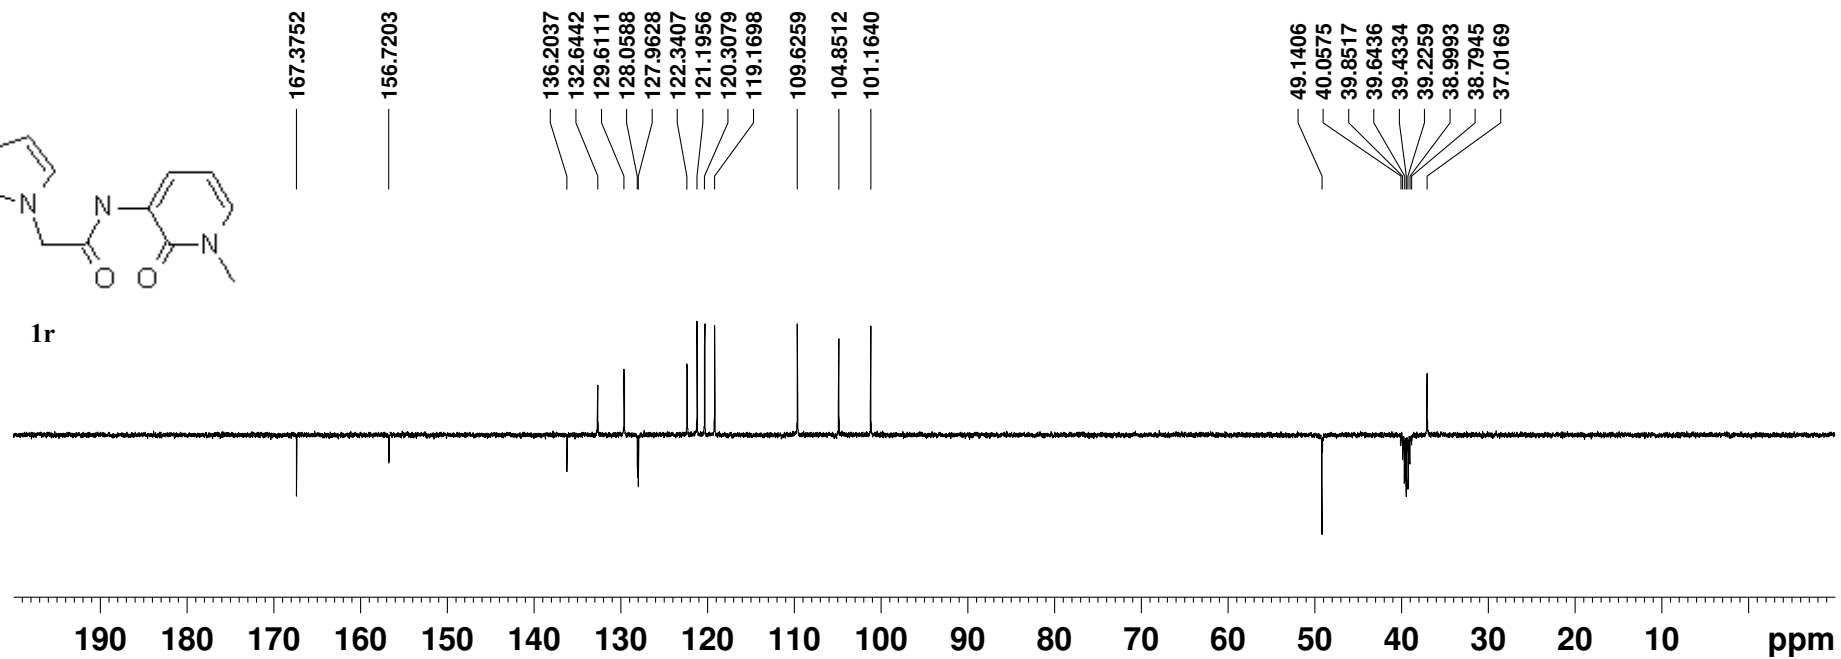

APT of 1r IN DMSO

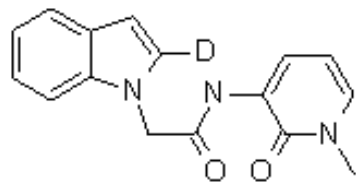

2r

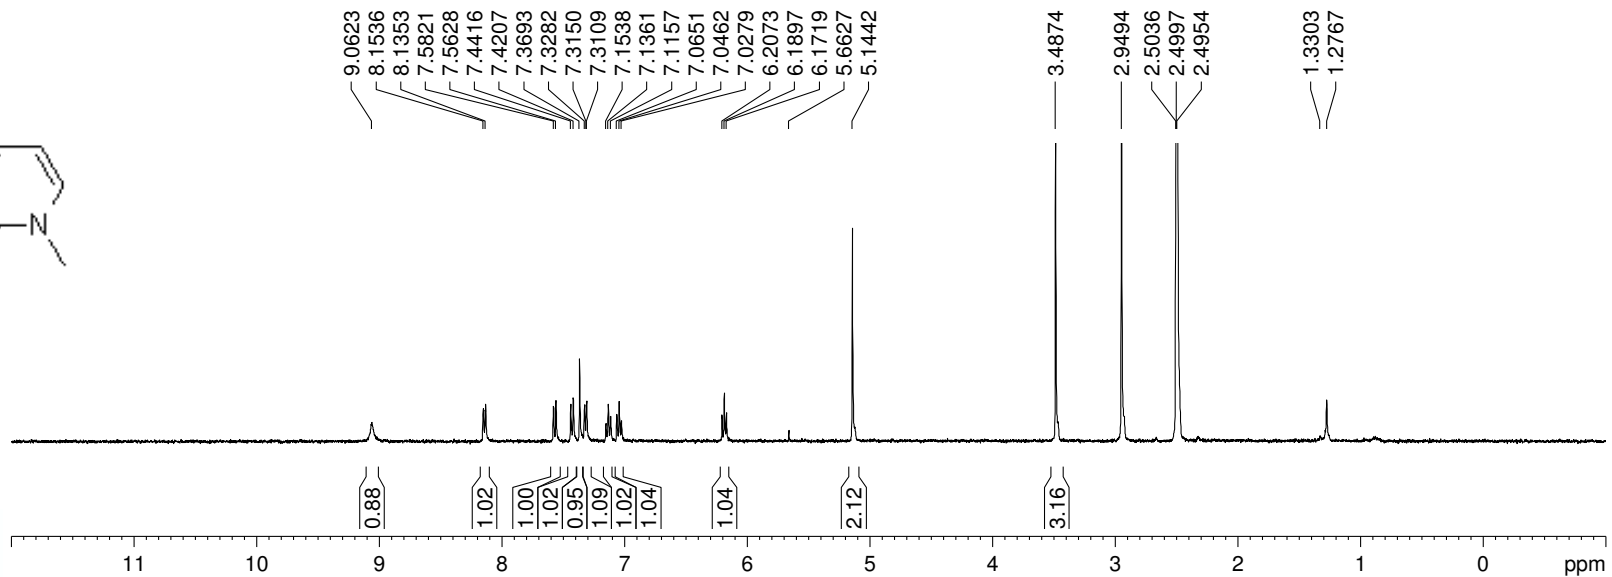

7.5718  
7.5522  
7.4308  
7.4113  
7.4029  
7.3915  
7.1374  
7.1186  
7.0996  
7.0503  
7.0315  
7.0134

**<sup>1</sup>H NMR of 2r IN DMSO AT 100°C**

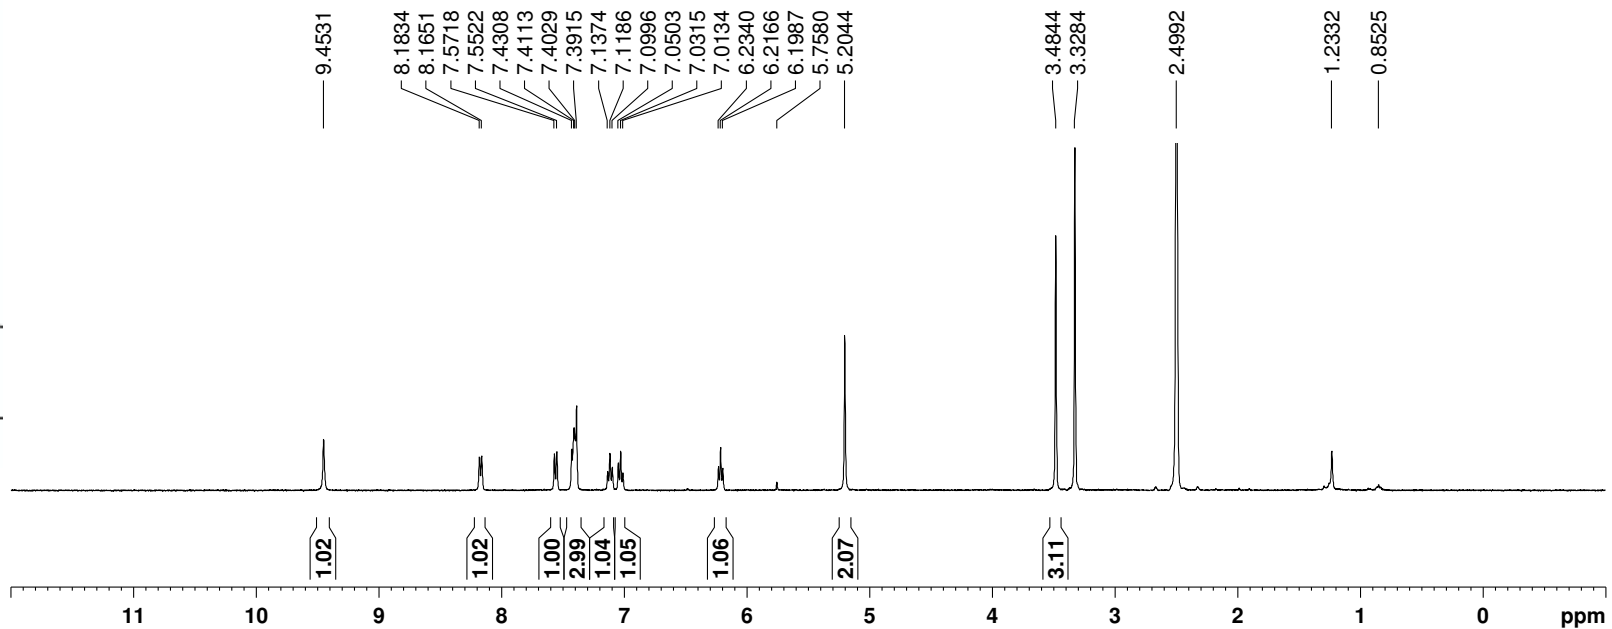

**<sup>1</sup>H NMR of 2r IN DMSO AT 20°C**

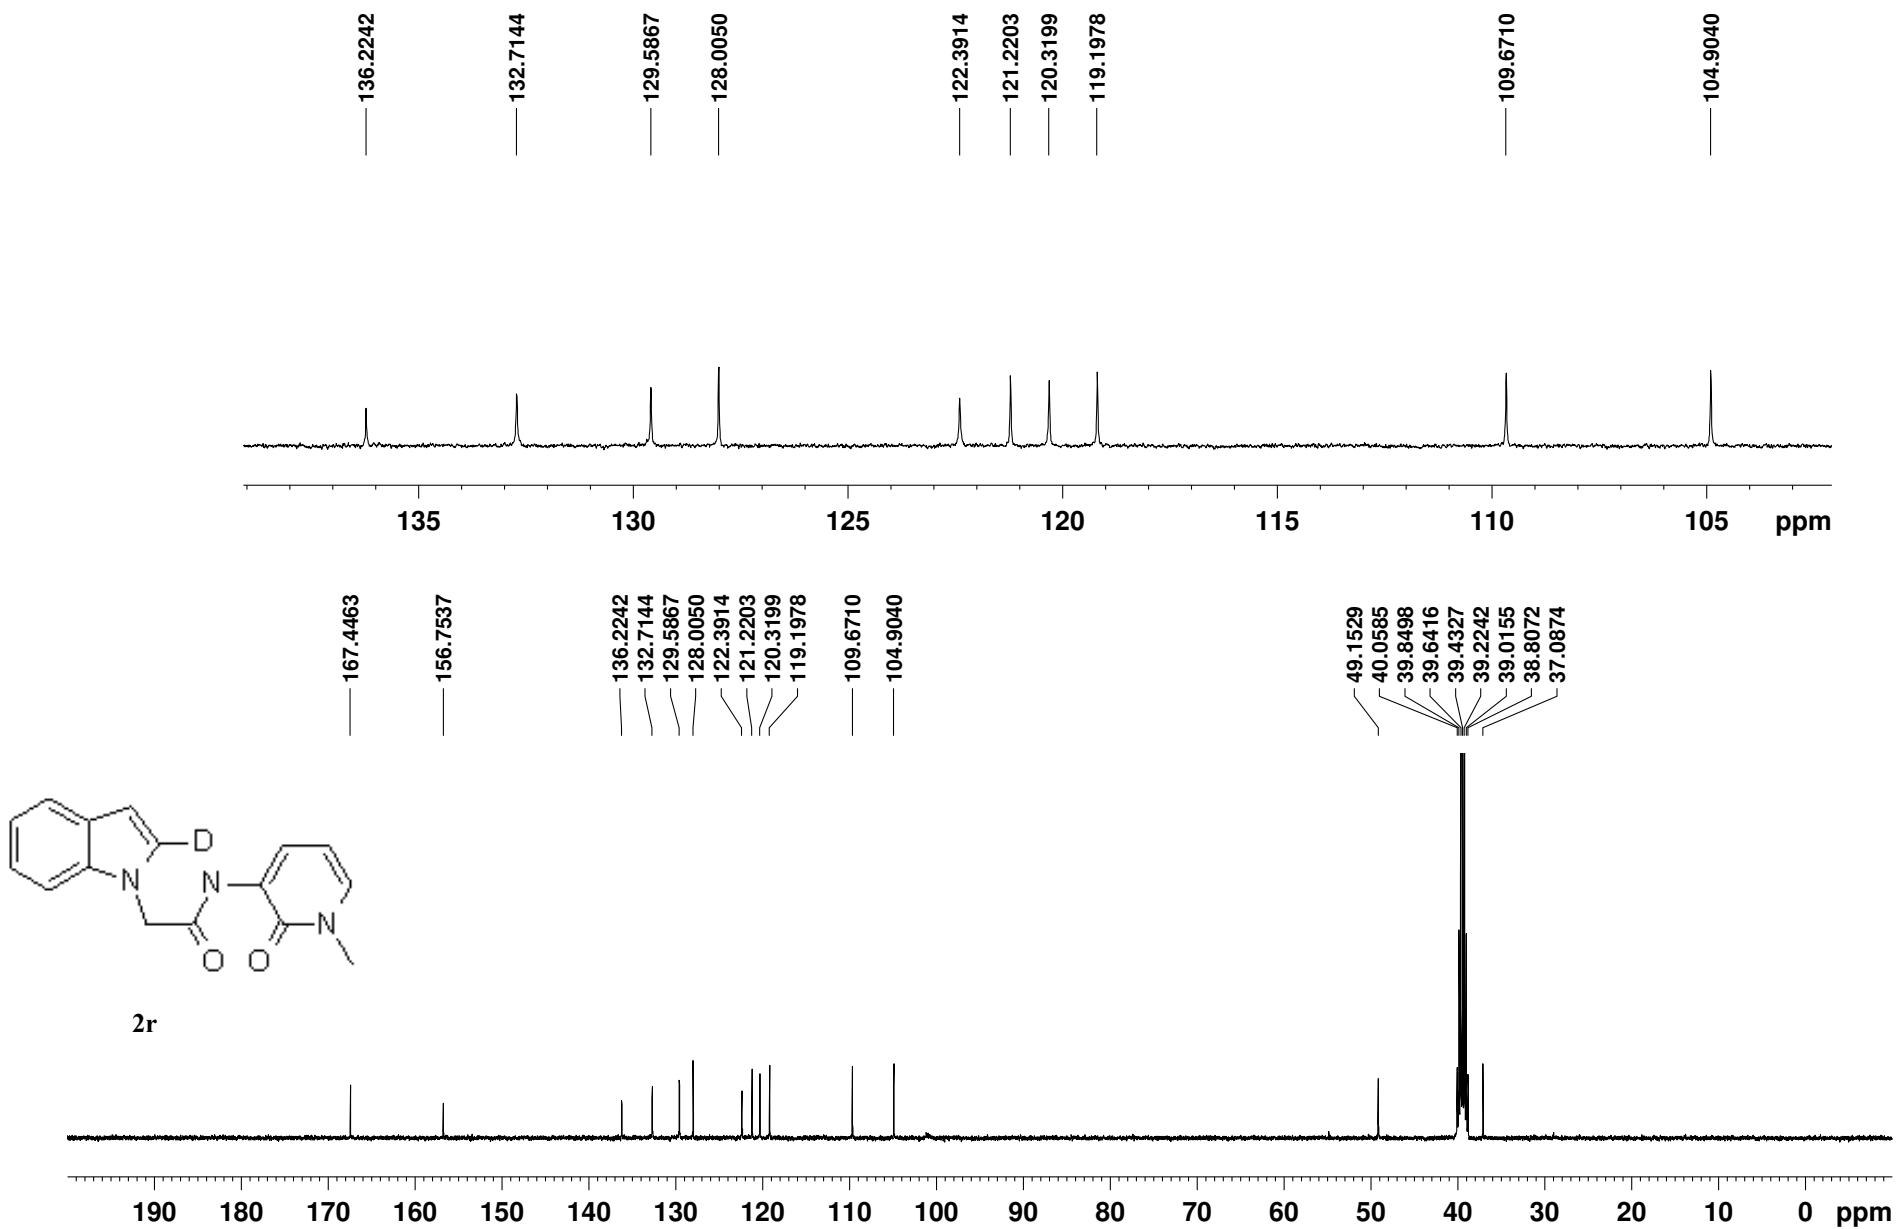

**<sup>13</sup>C NMR of 2r IN DMSO**

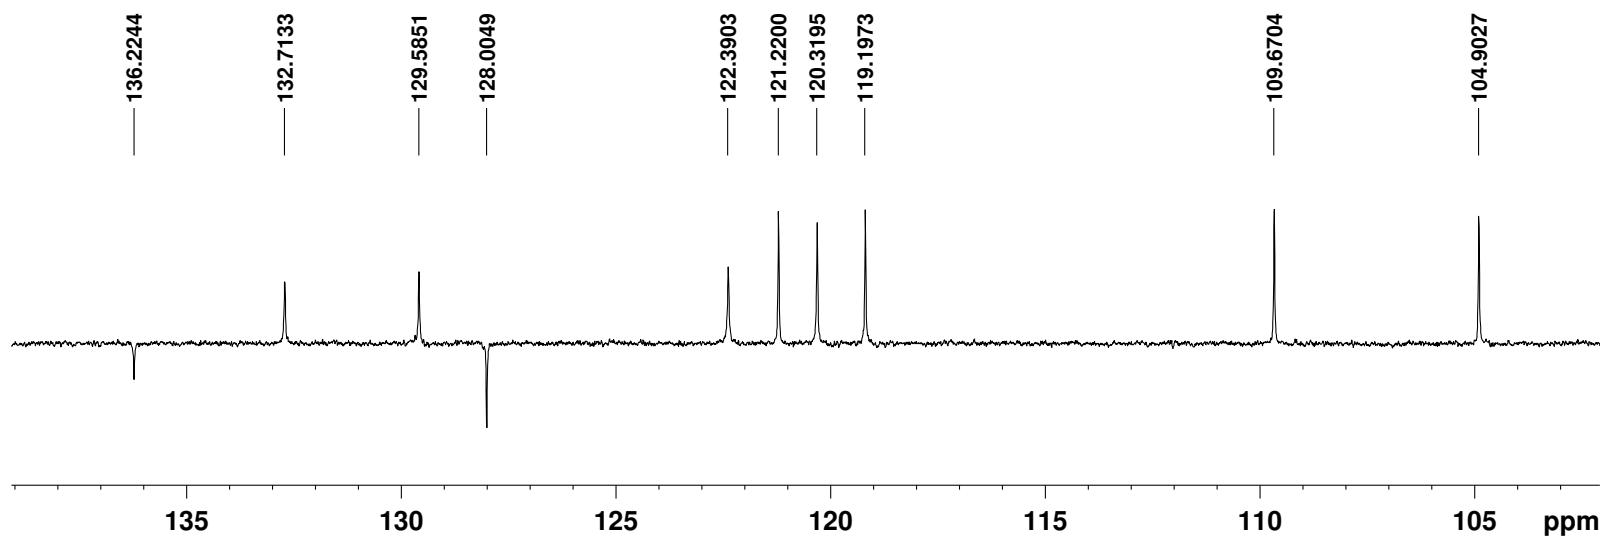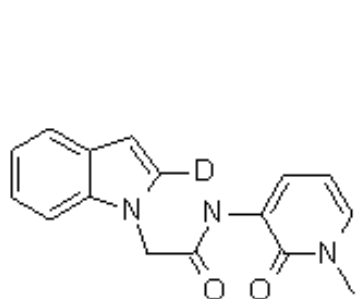

2r

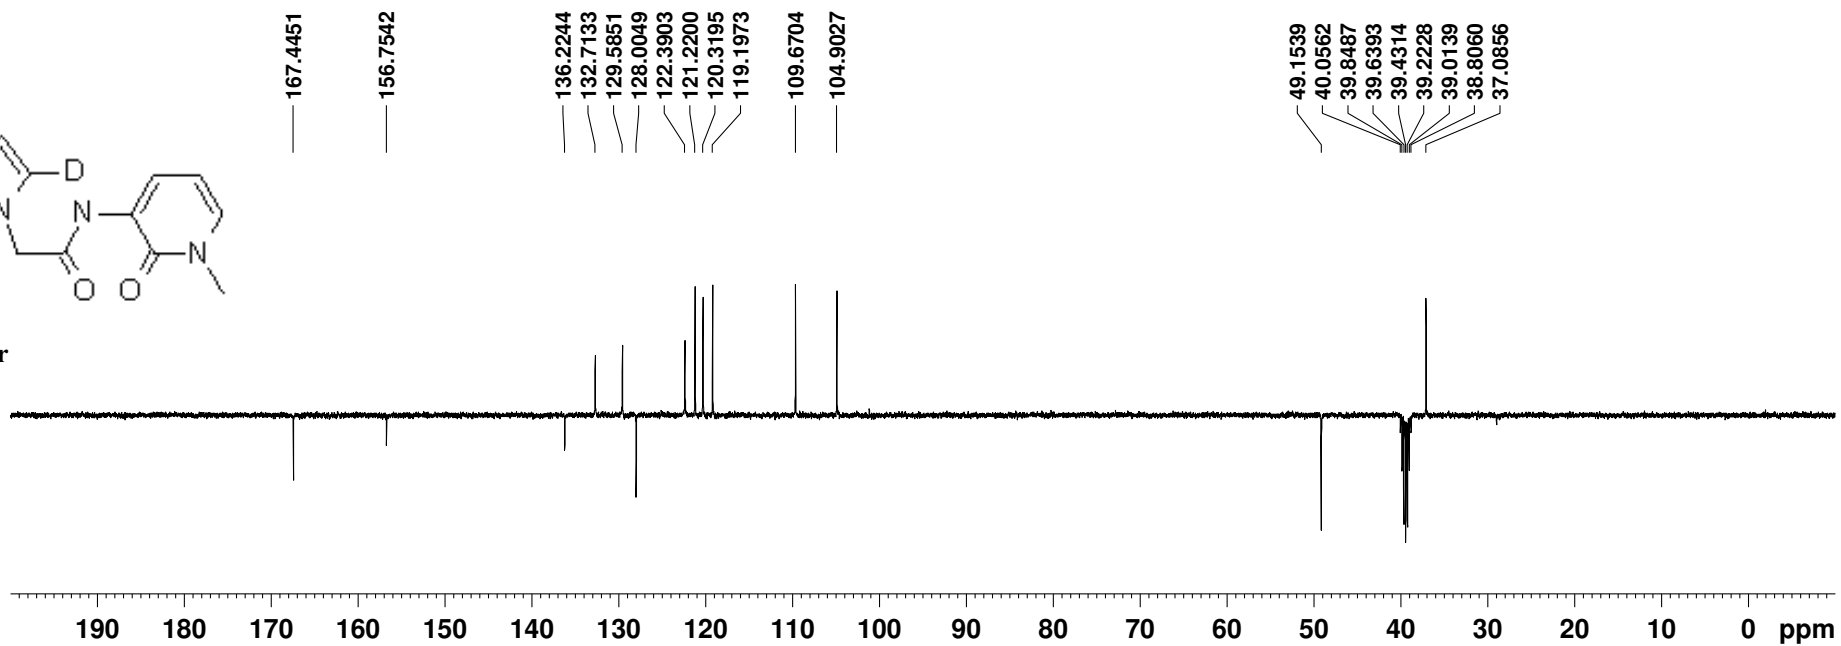

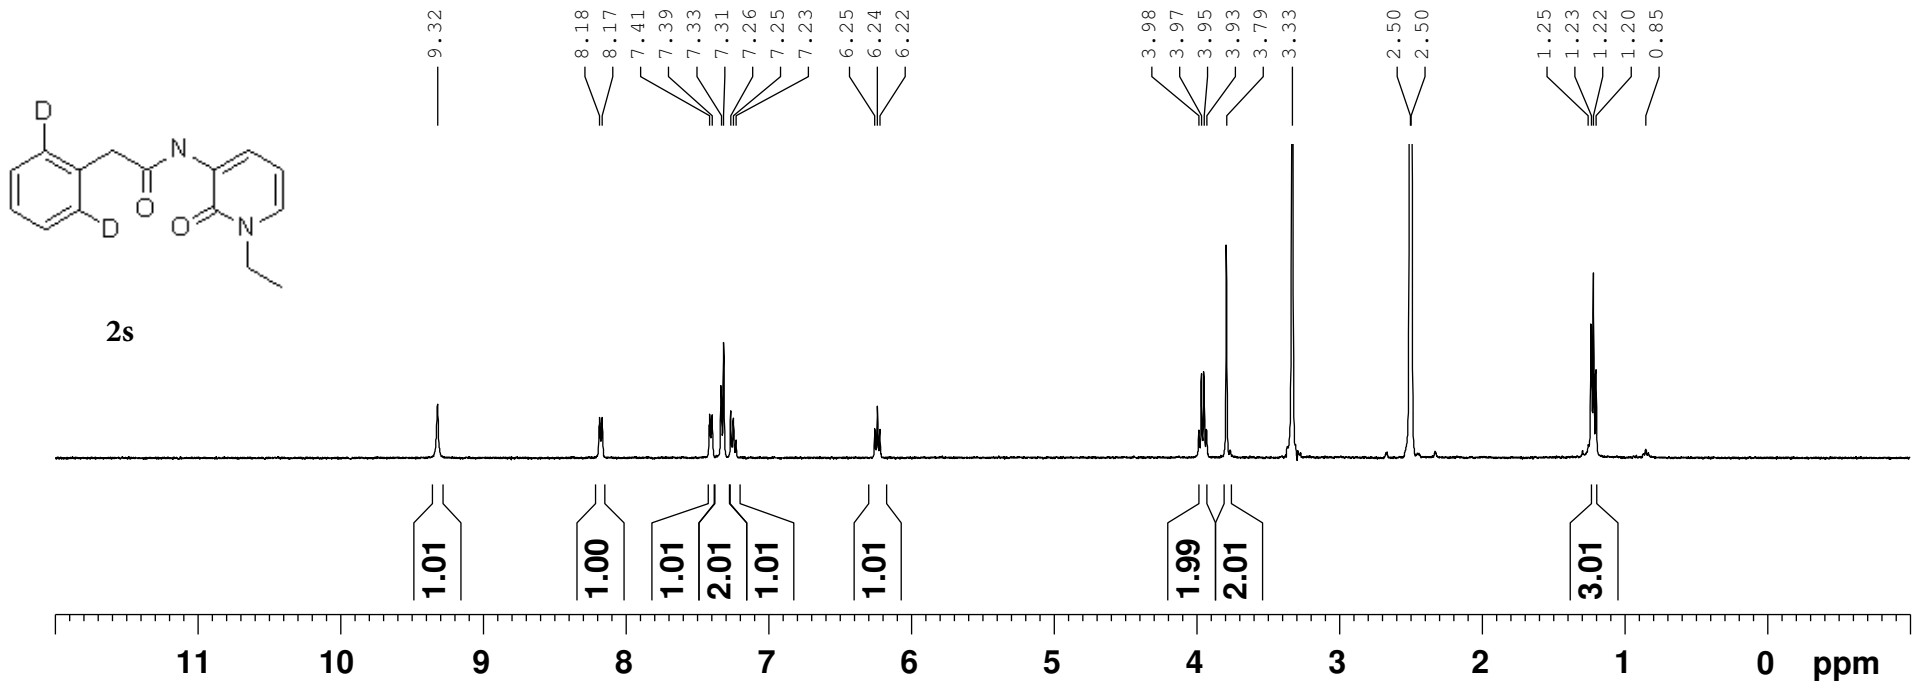

<sup>1</sup>H NMR of 2s IN DMSO

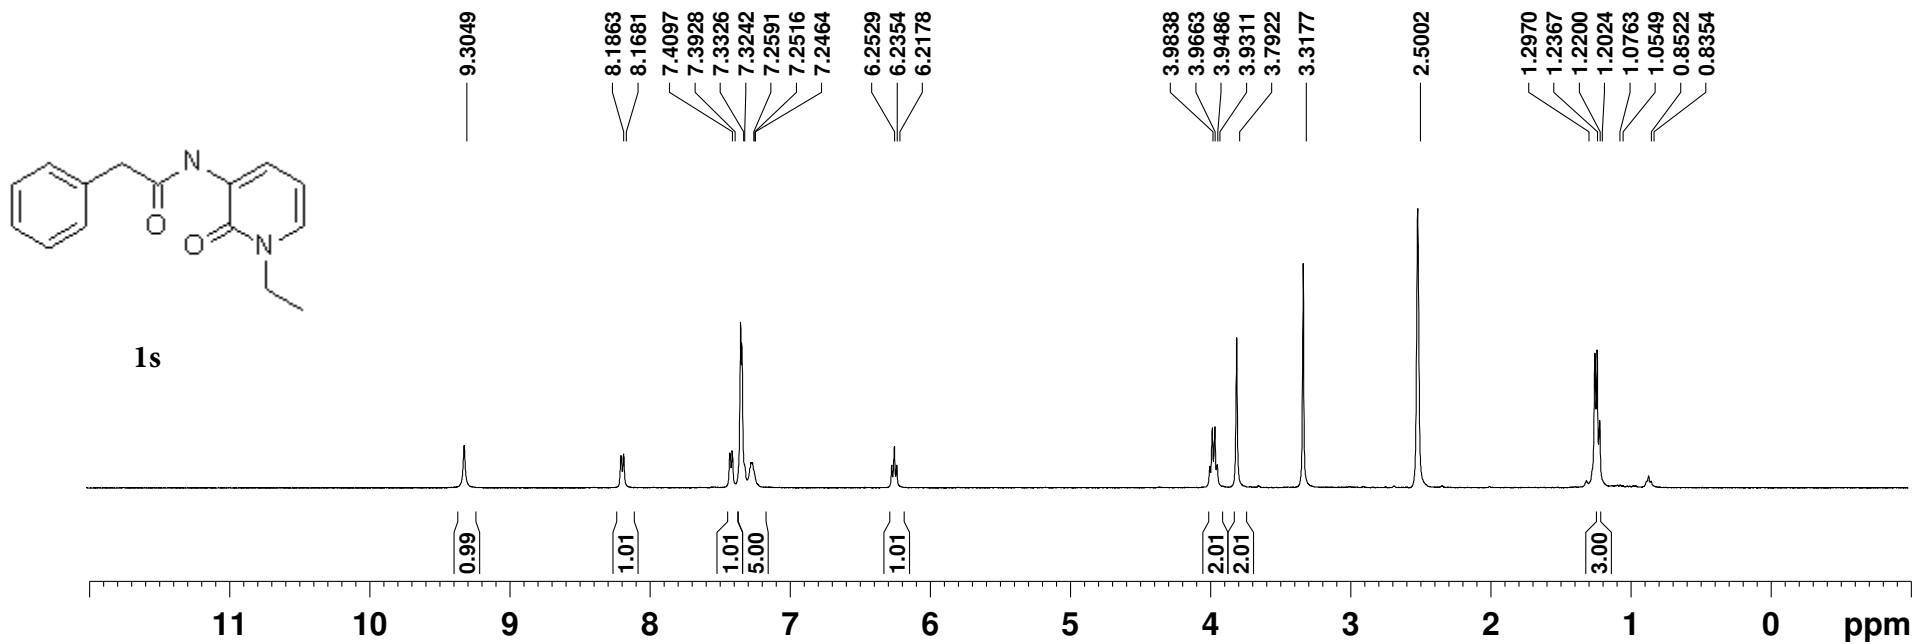

<sup>1</sup>H NMR of 1s IN DMSO

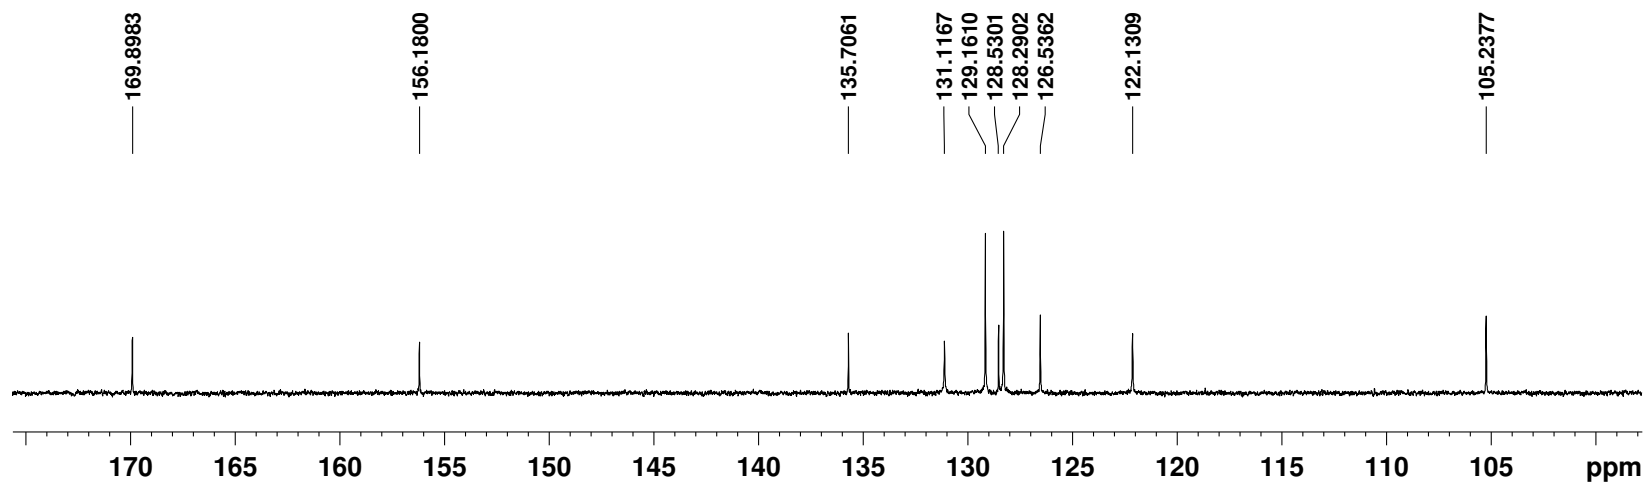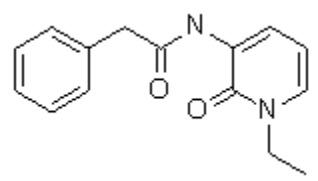

1s

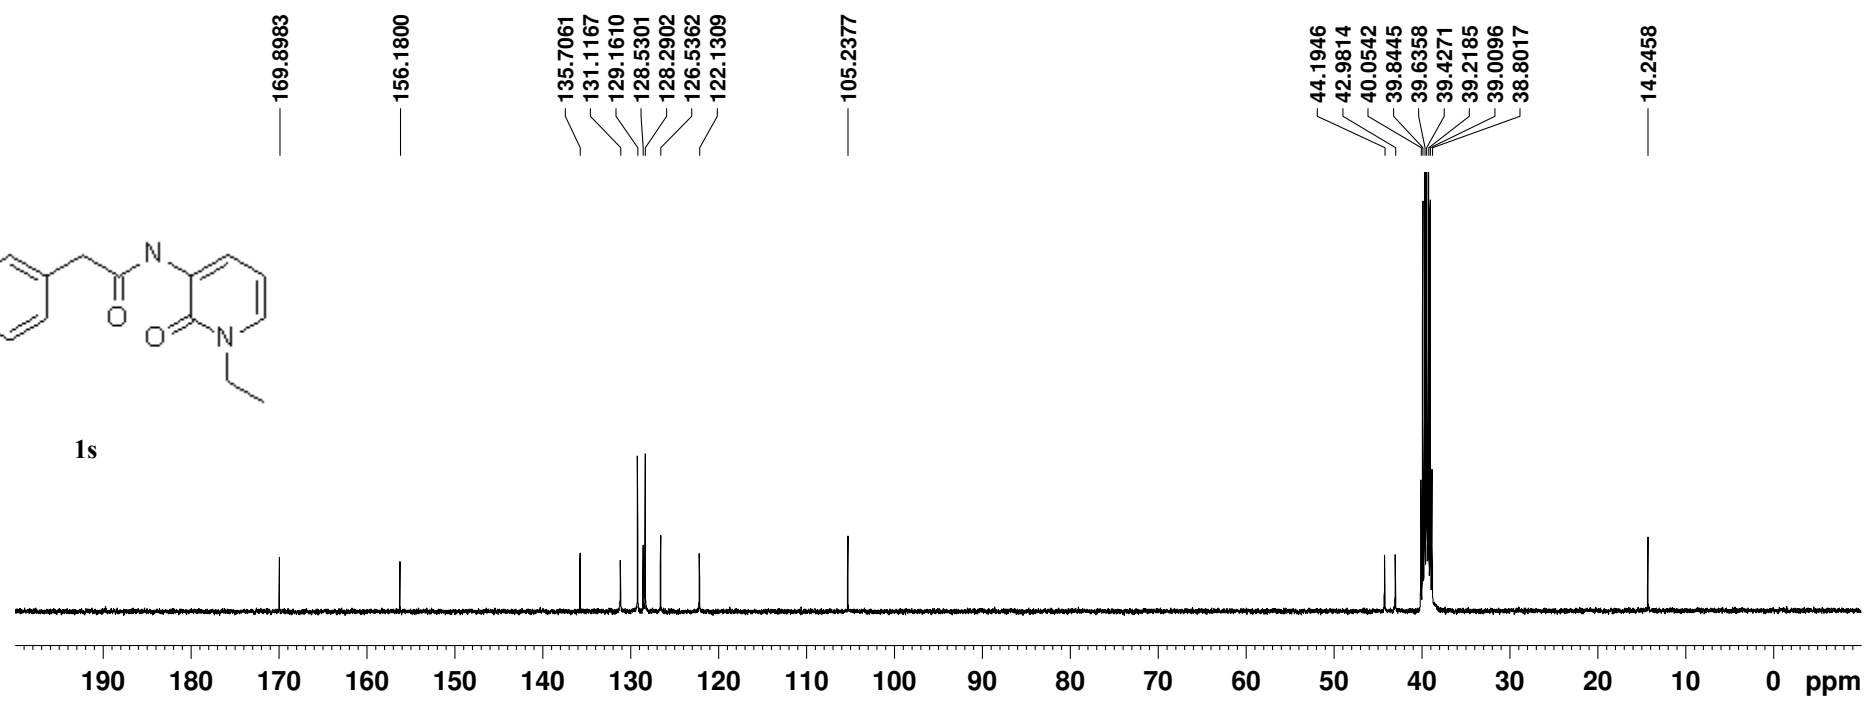

13C NMR of 1s IN DMSO



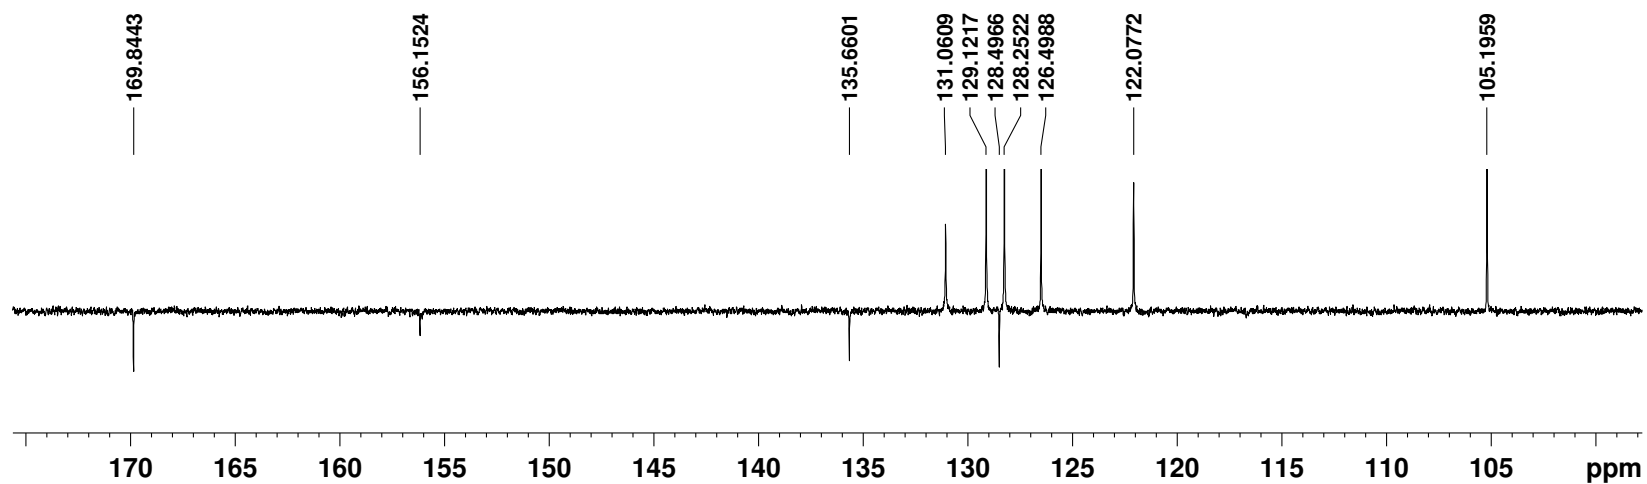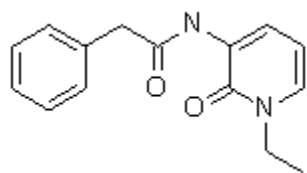

1s

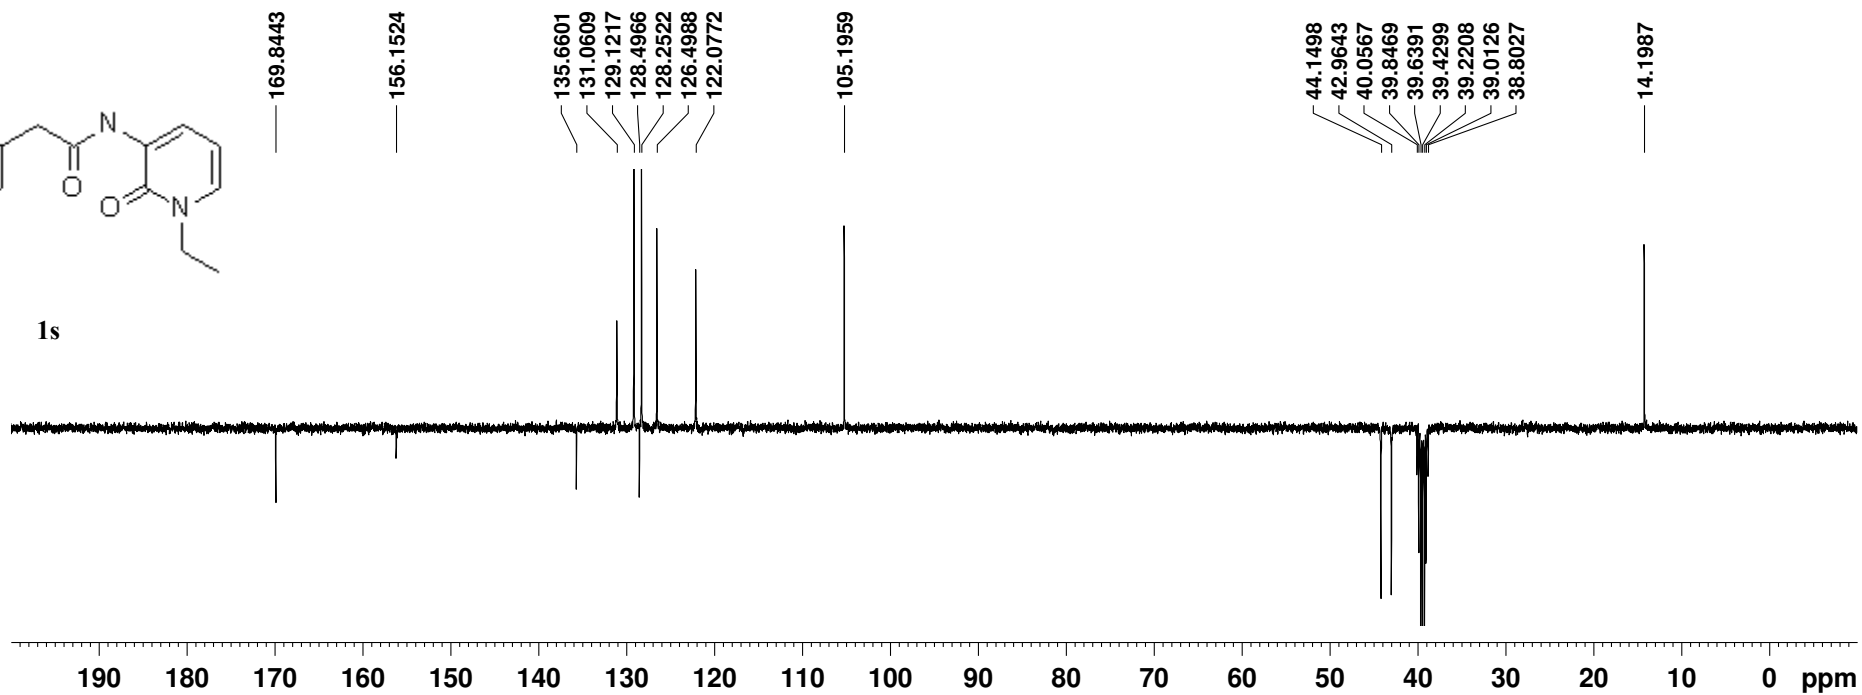

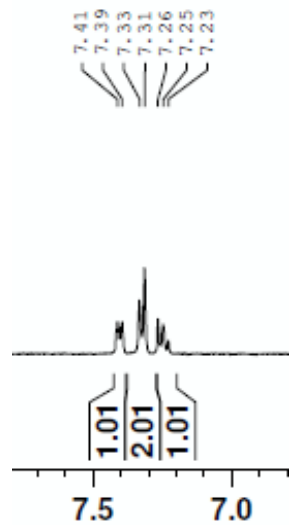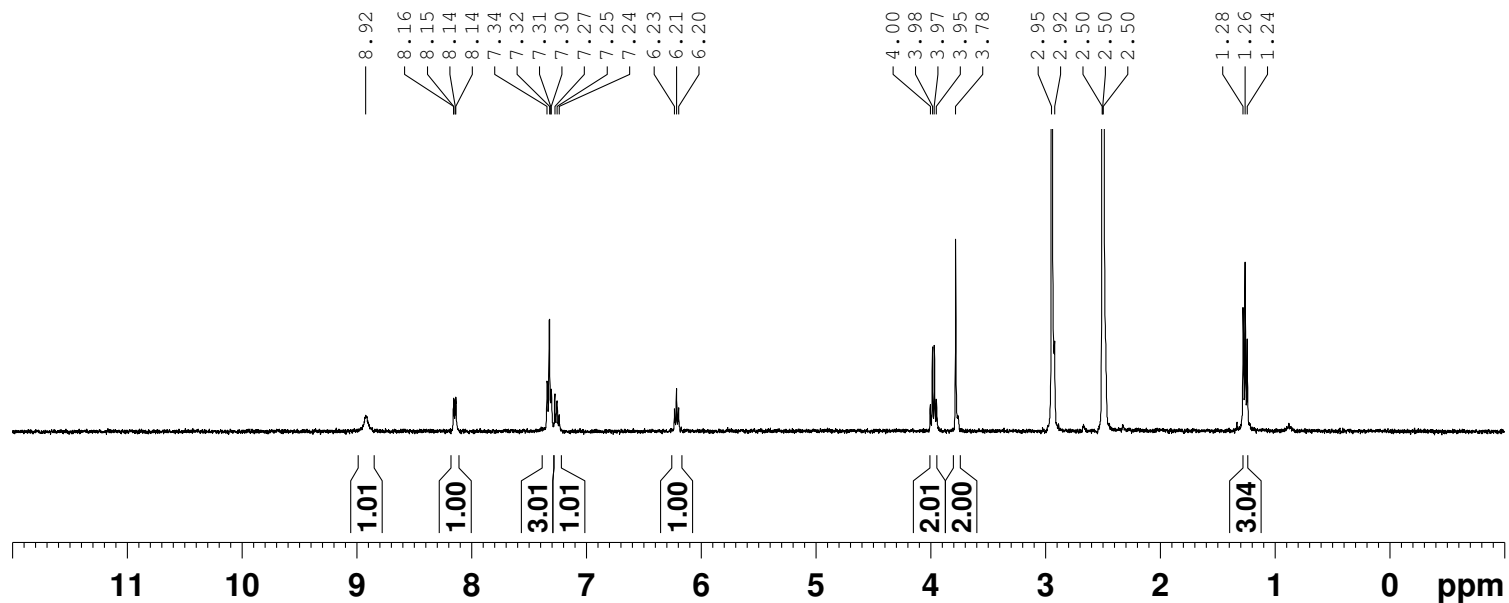

$^1\text{H}$  NMR of 2s IN DMSO AT 100°C

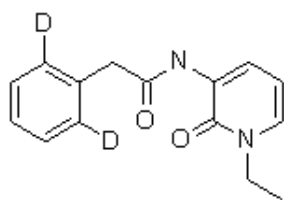

2s

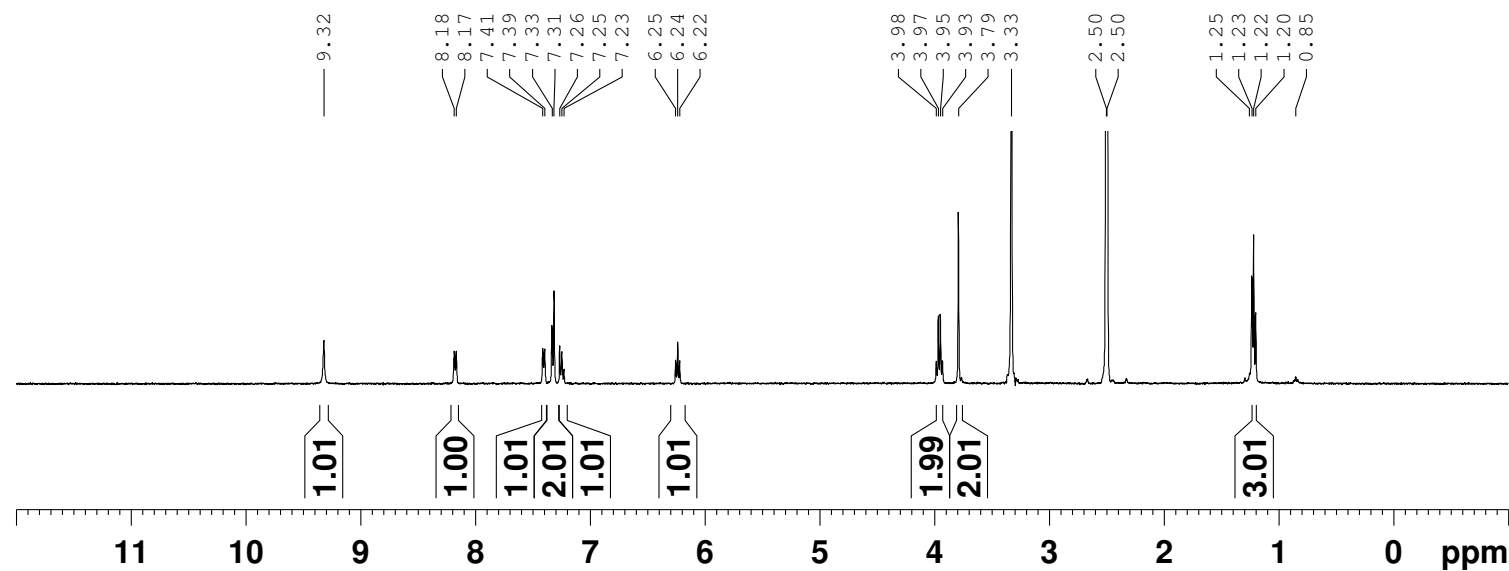

$^1\text{H}$  NMR of 2s IN DMSO AT 20°C

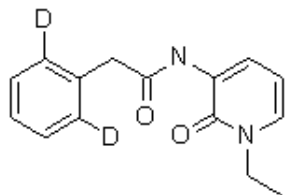

2s

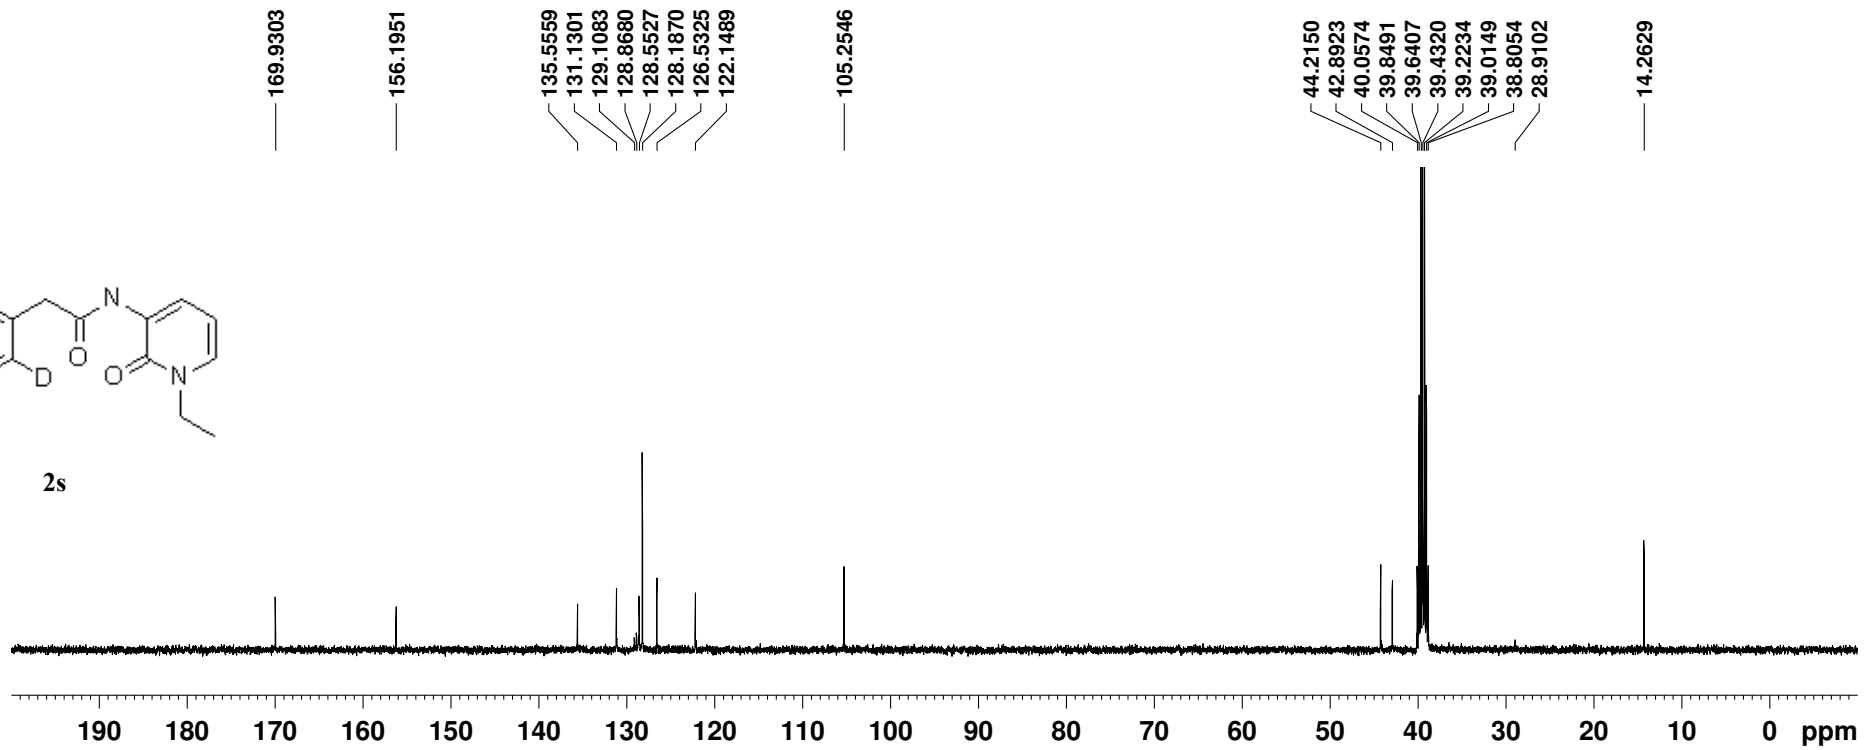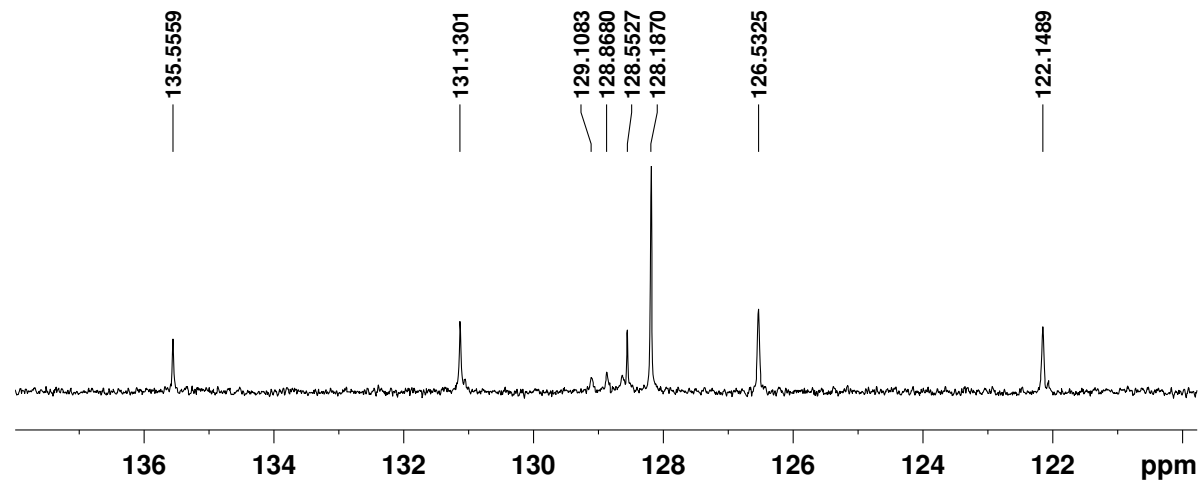

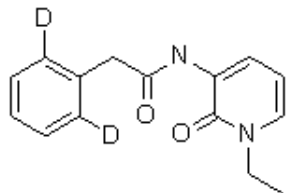

2s

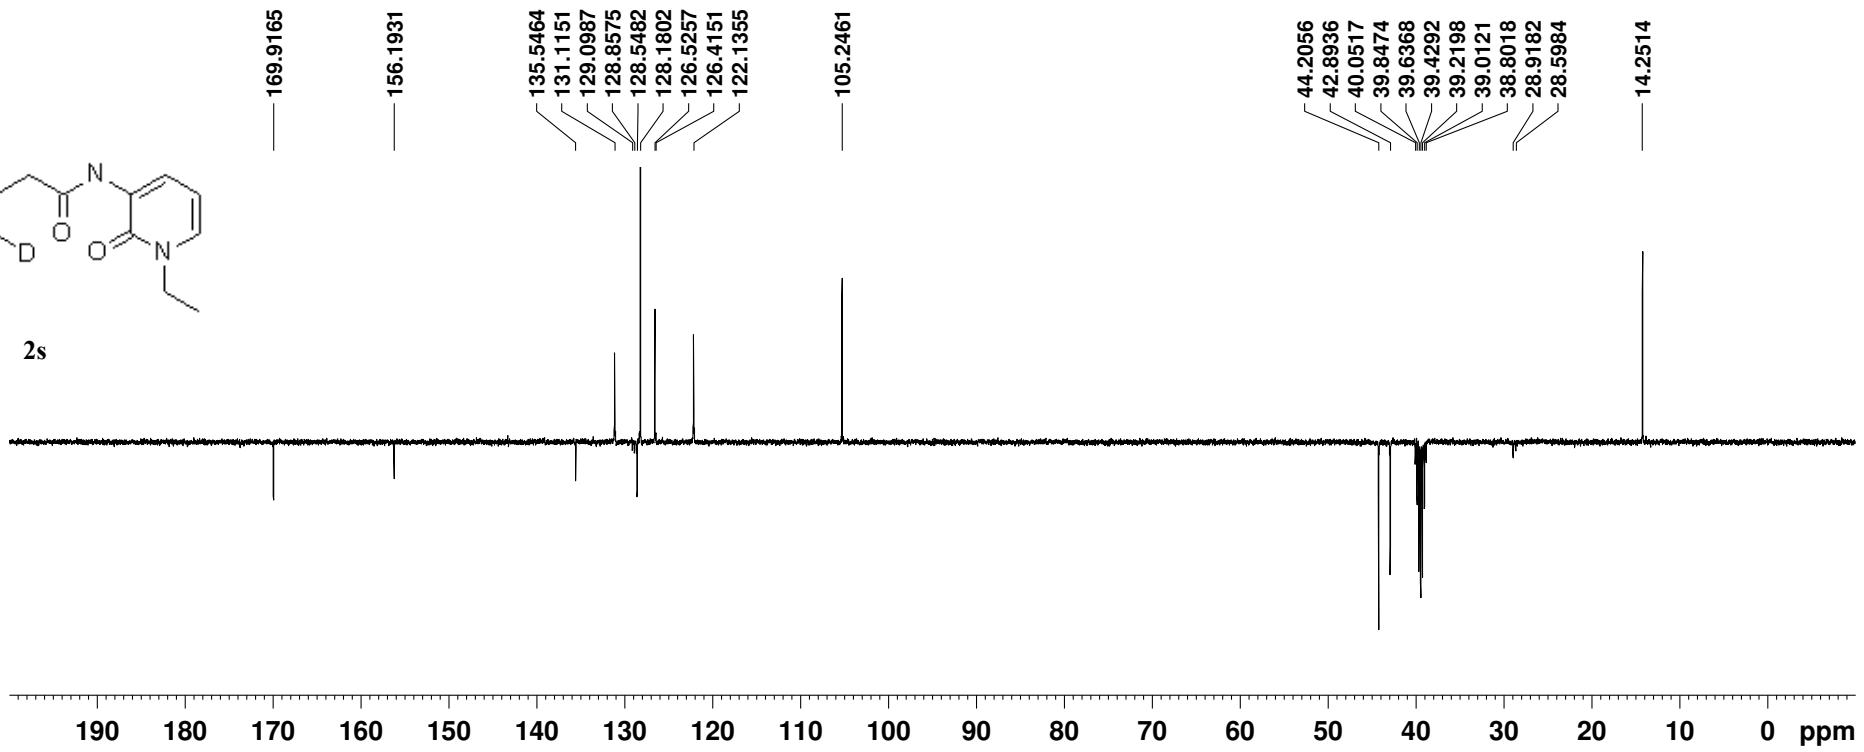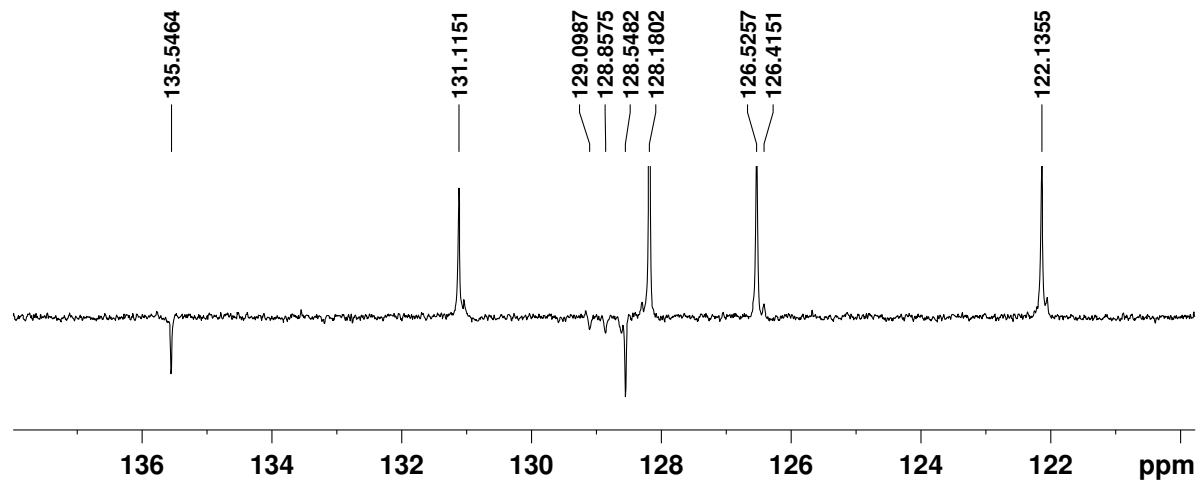

APT of 2s IN DMSO

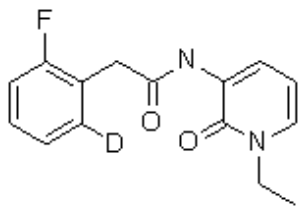

2t

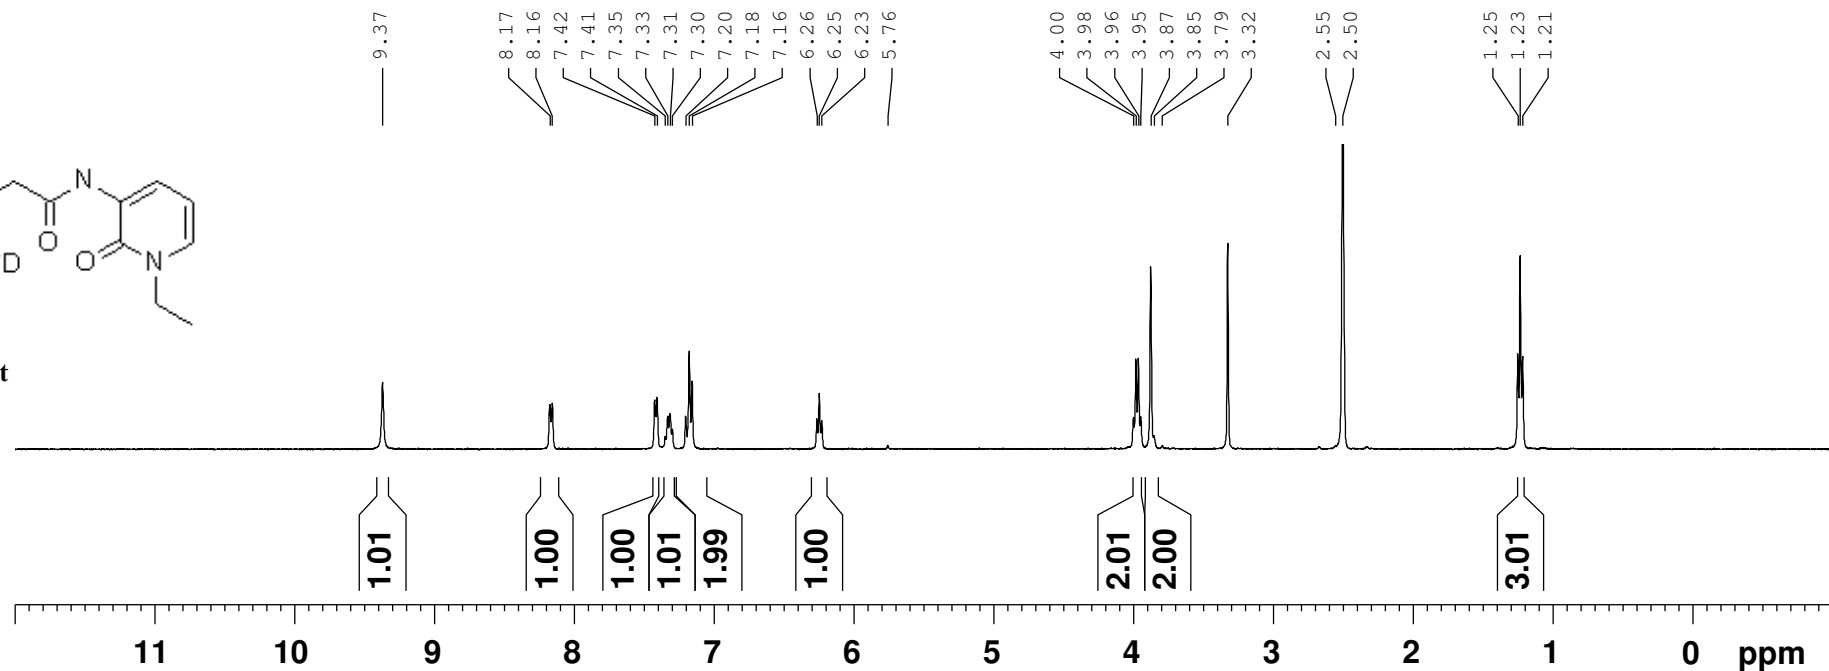

<sup>1</sup>H NMR of 2t IN DMSO

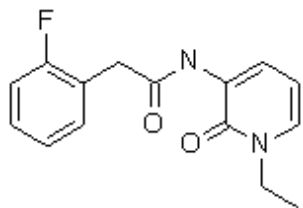

1t

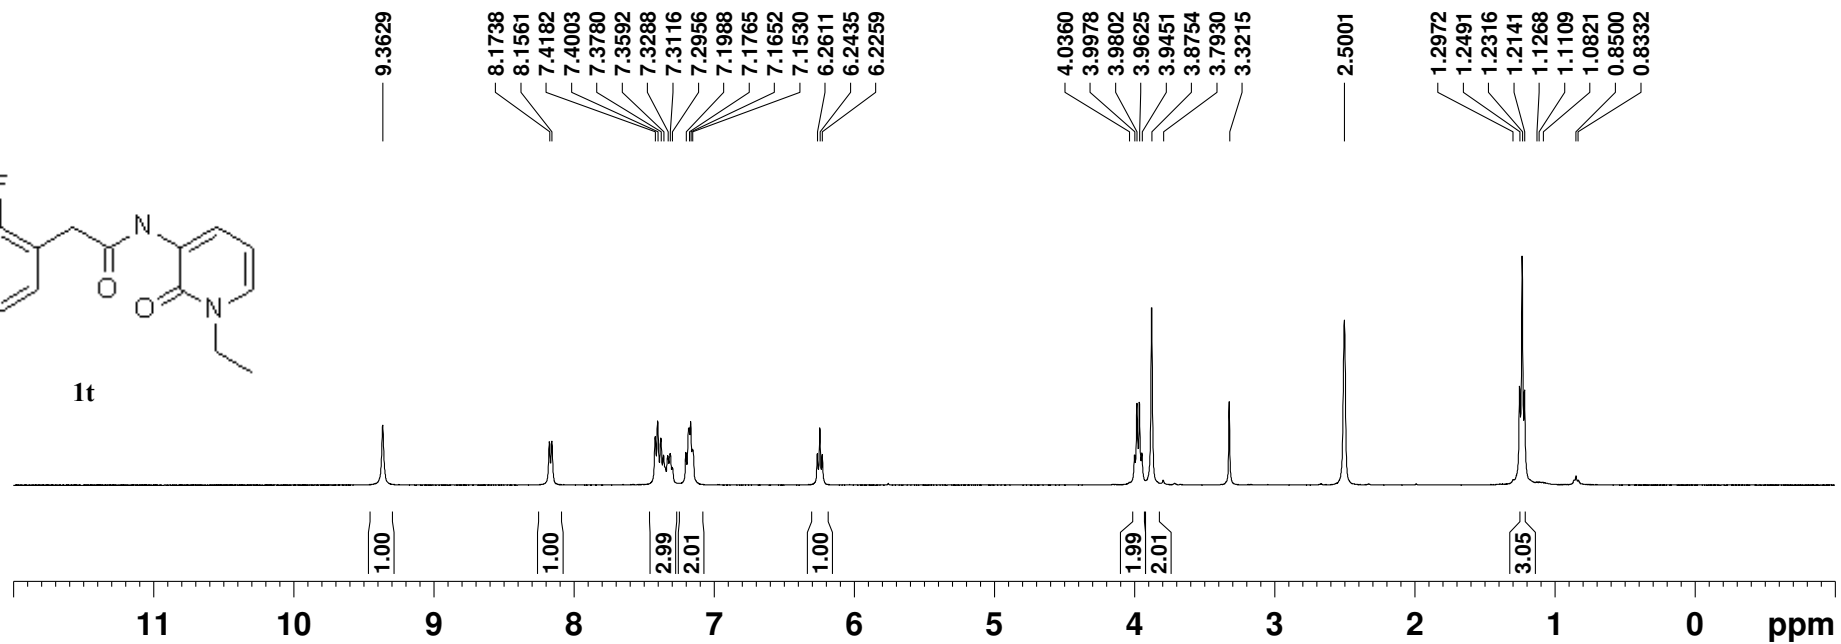

<sup>1</sup>H NMR of 1t IN DMSO

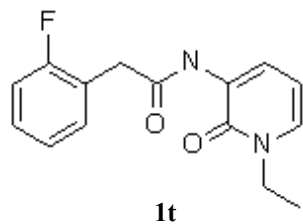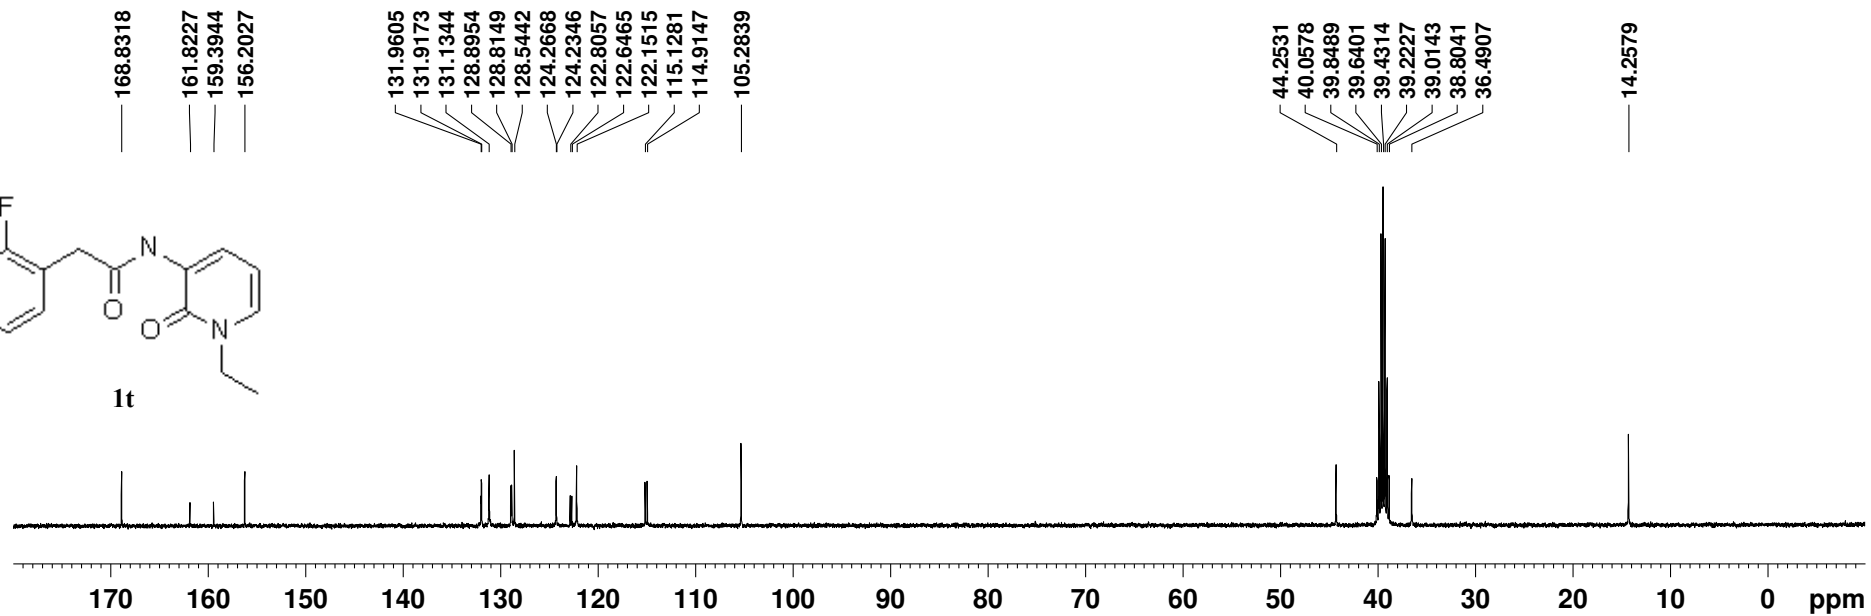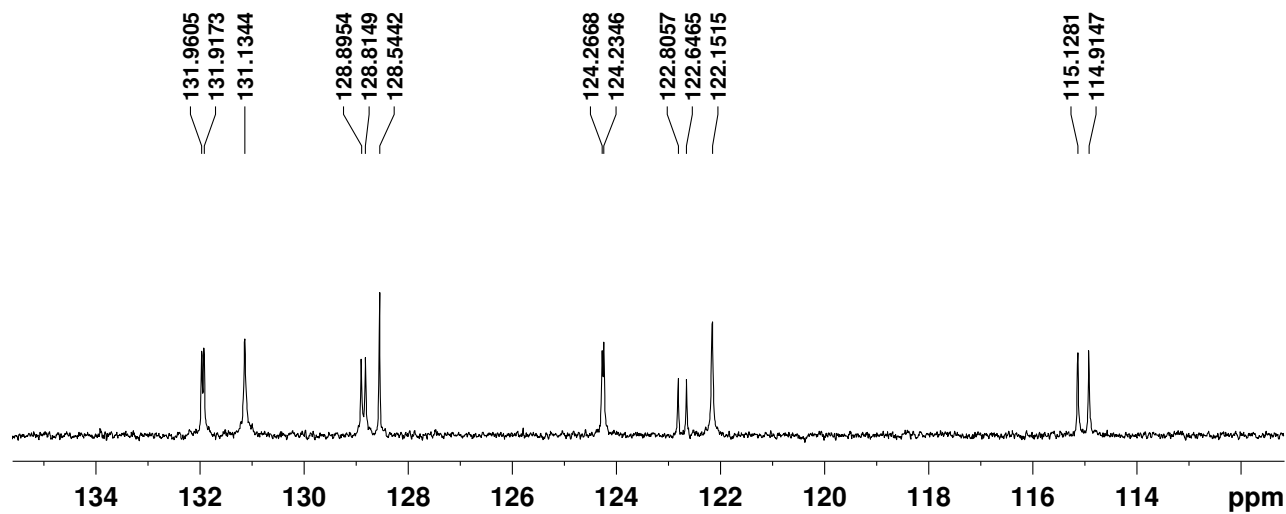

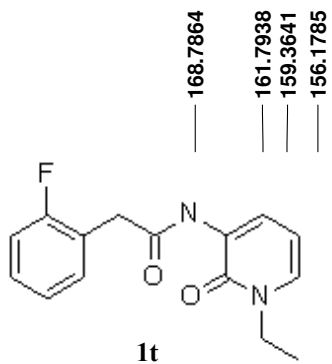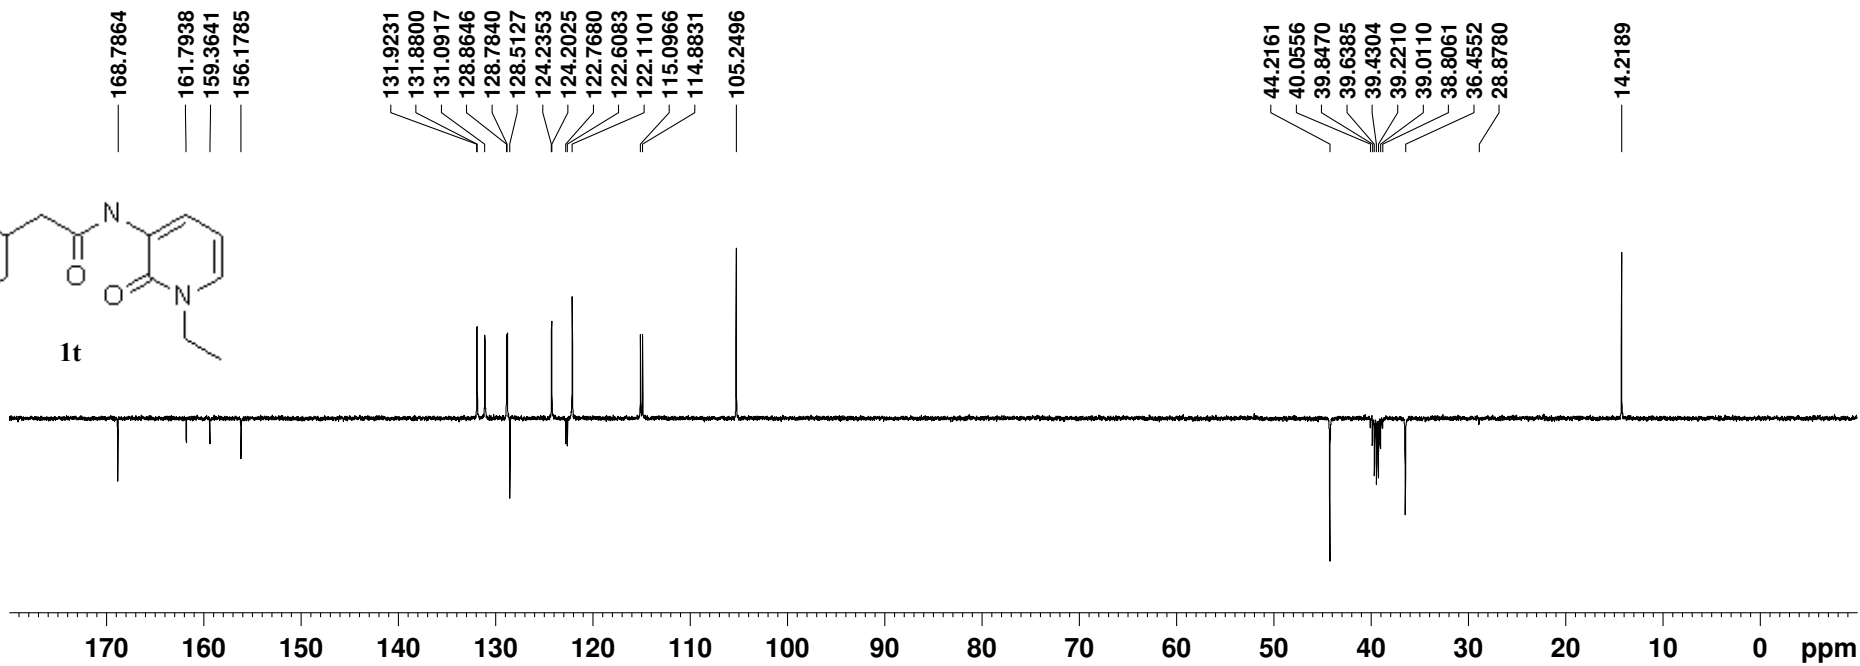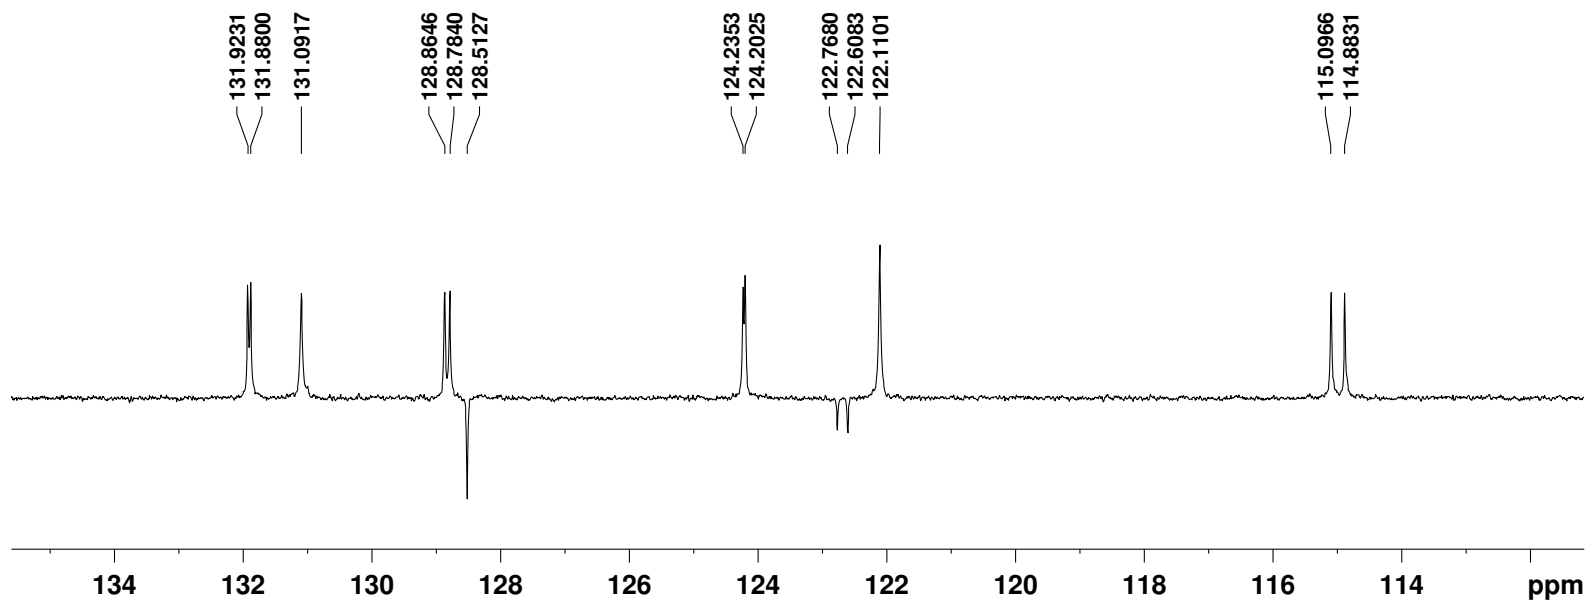

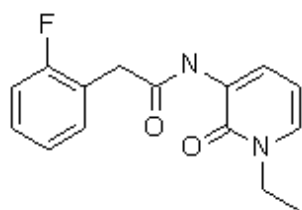

1t

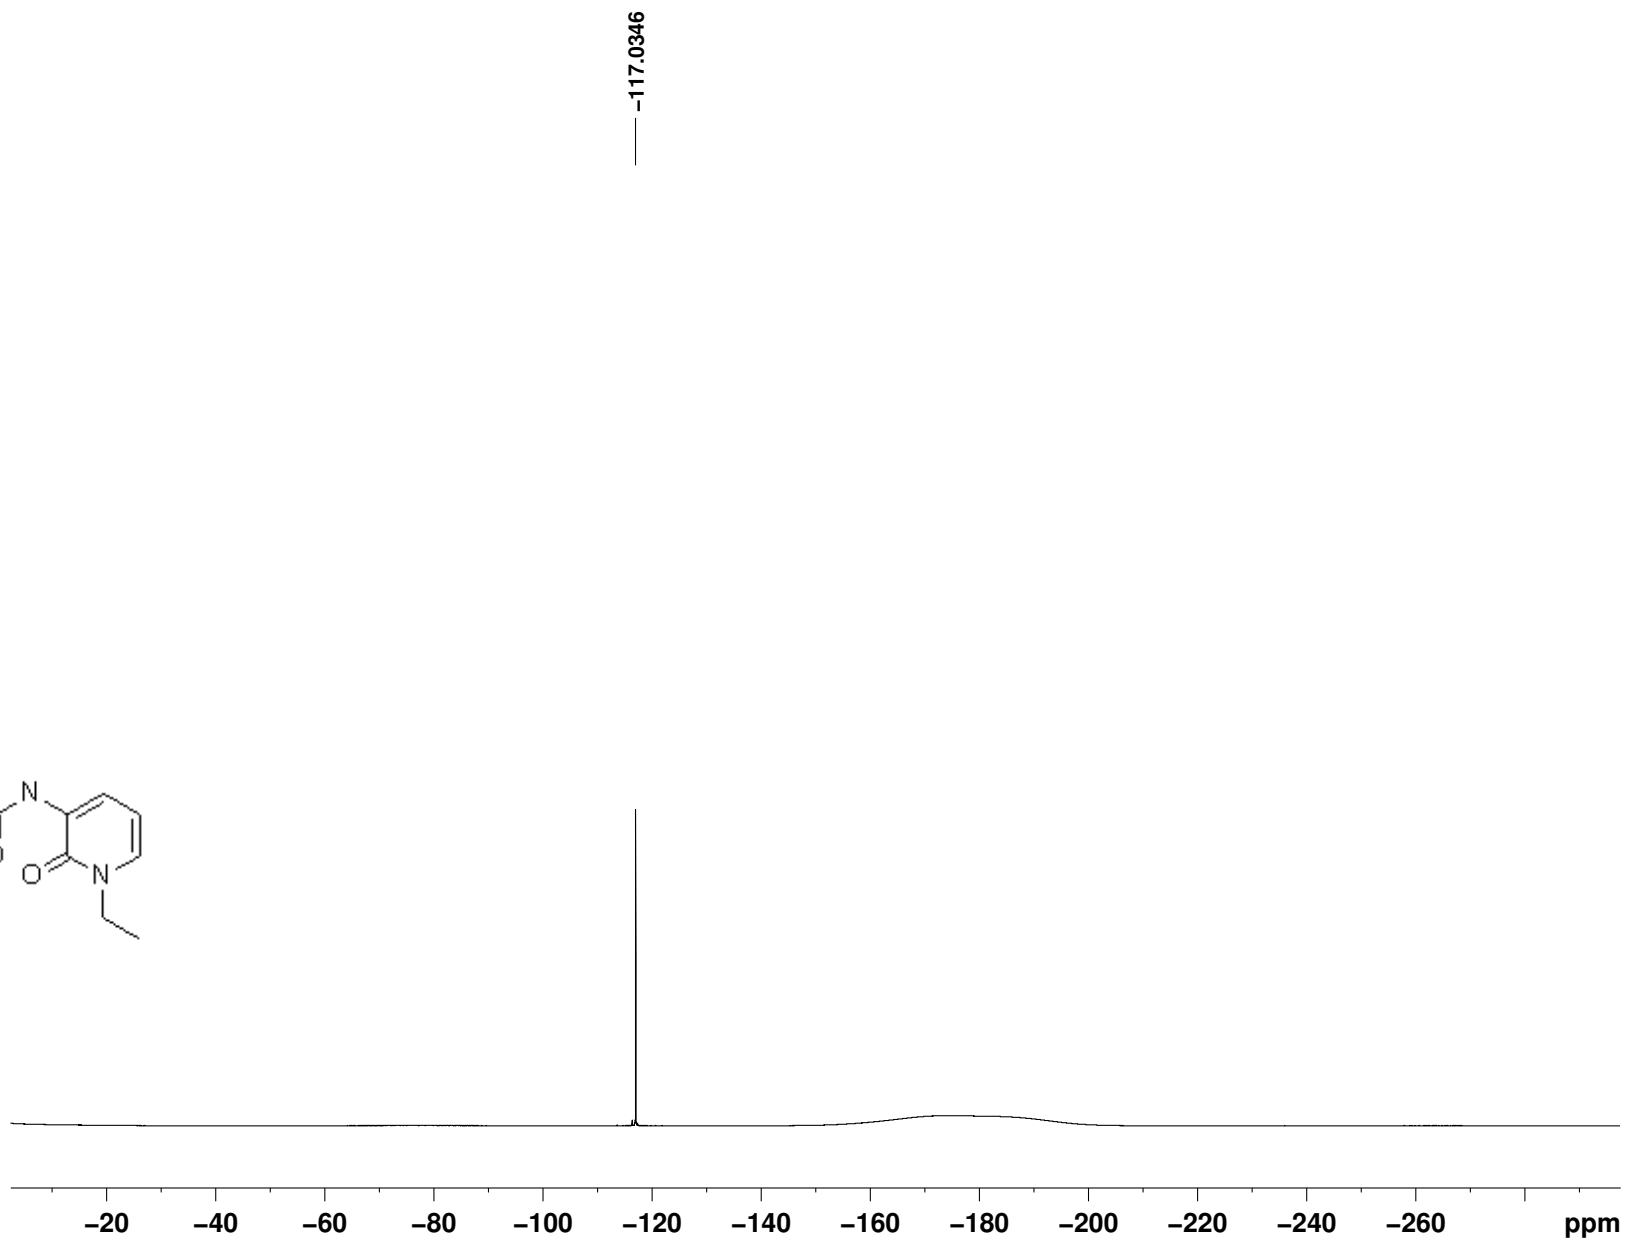

<sup>19</sup>F of 1t IN DMSO



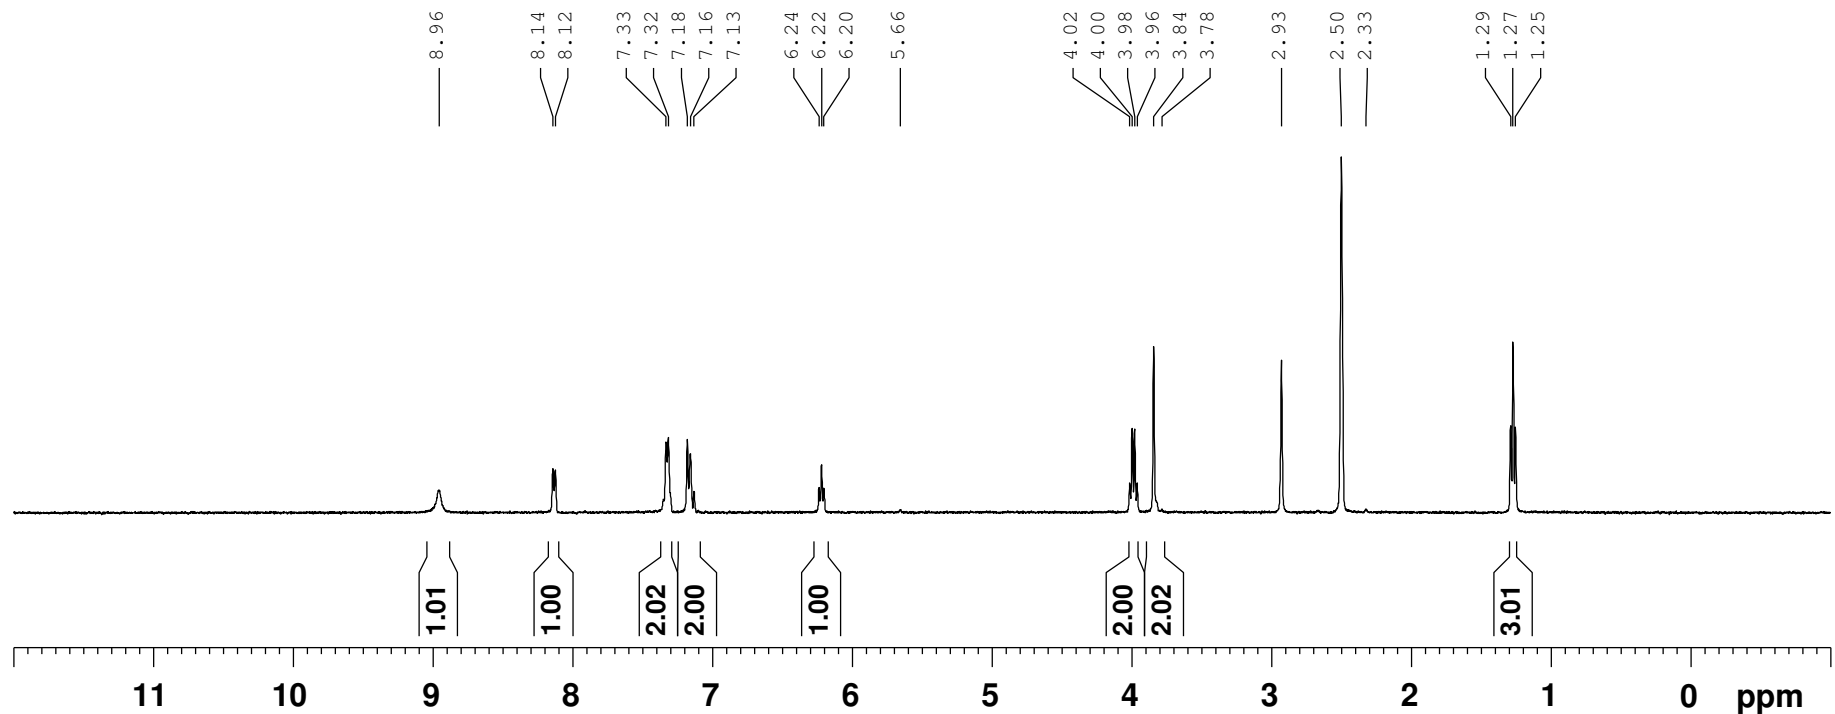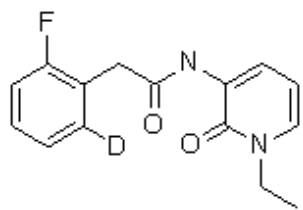

2t

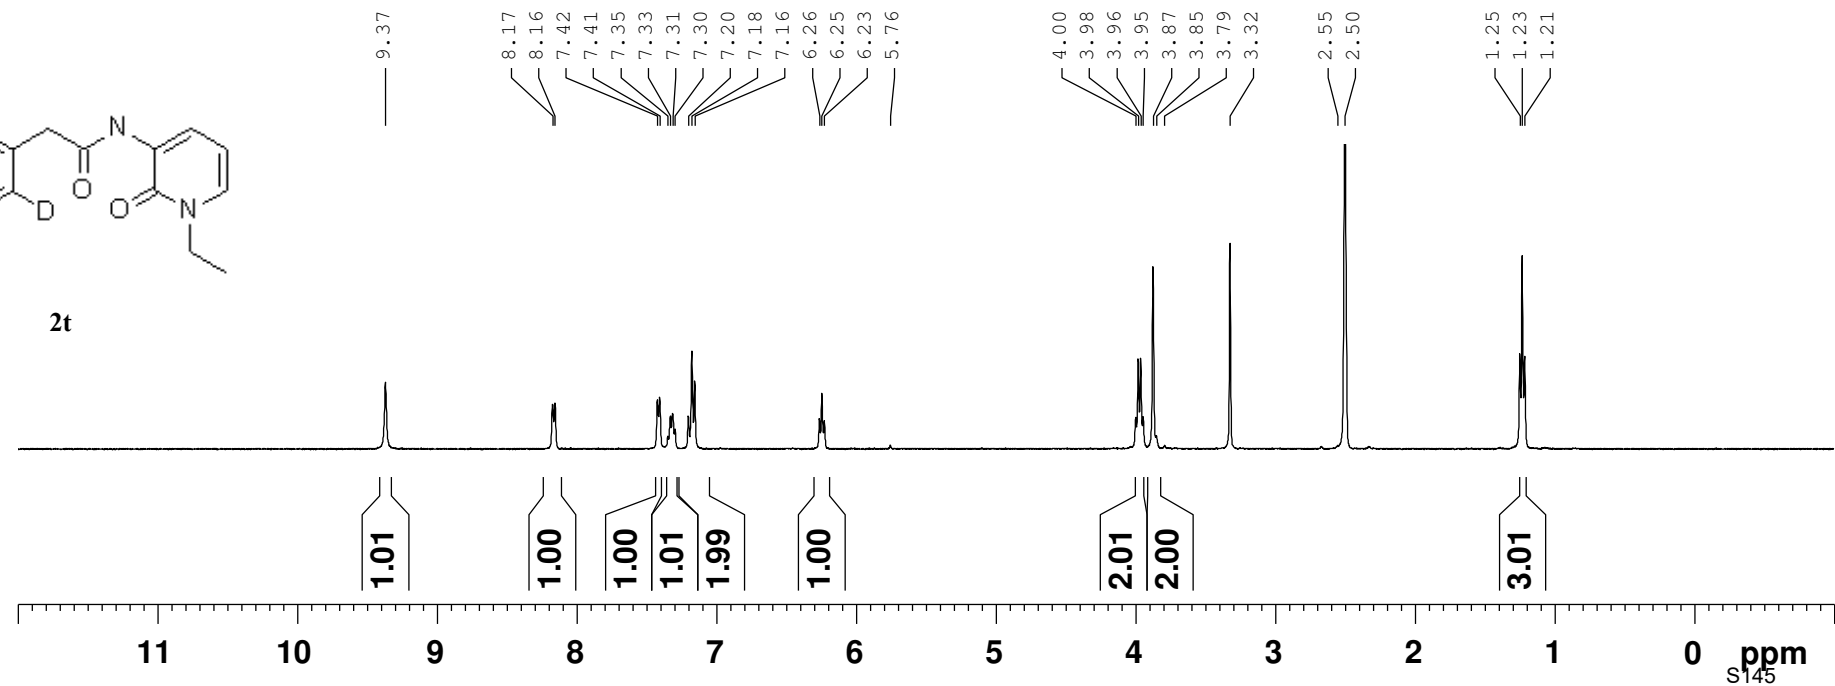

**<sup>1</sup>H NMR of 2t IN DMSO AT 20°C**

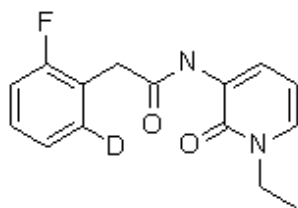

2t

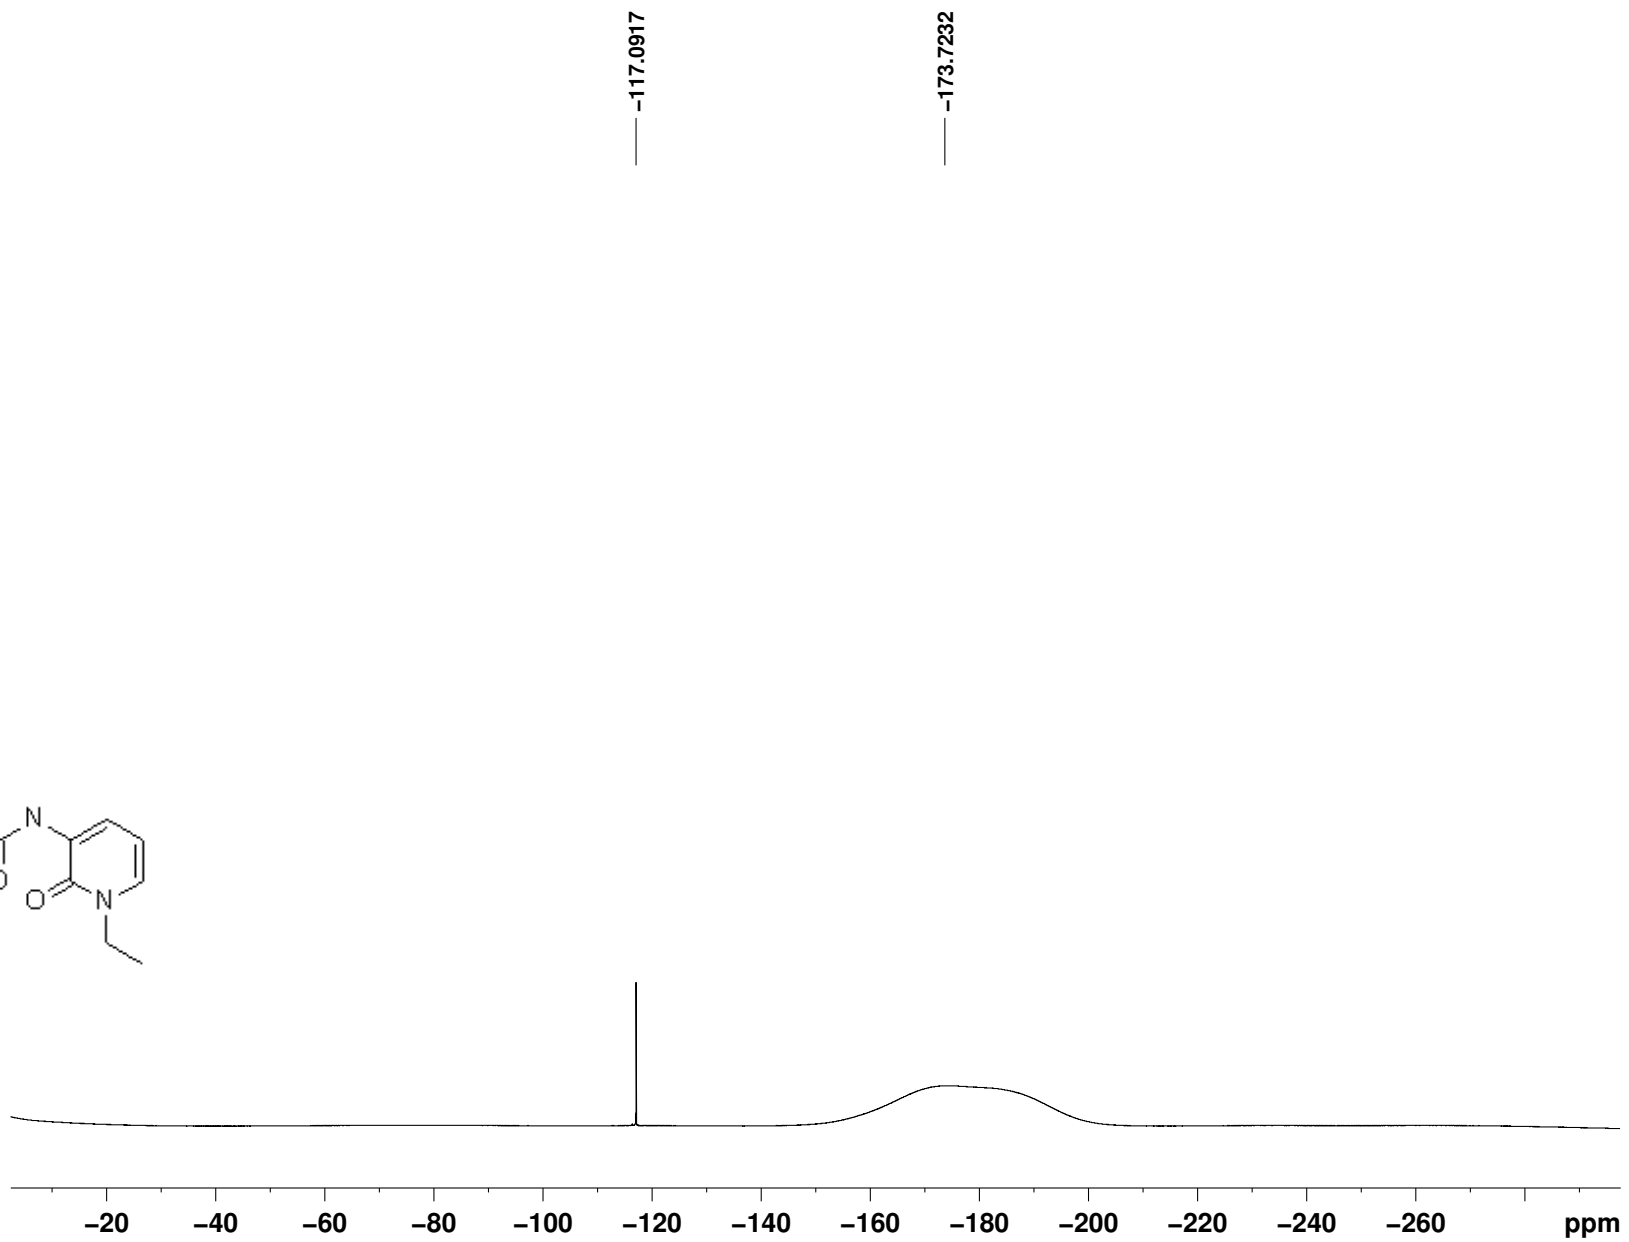

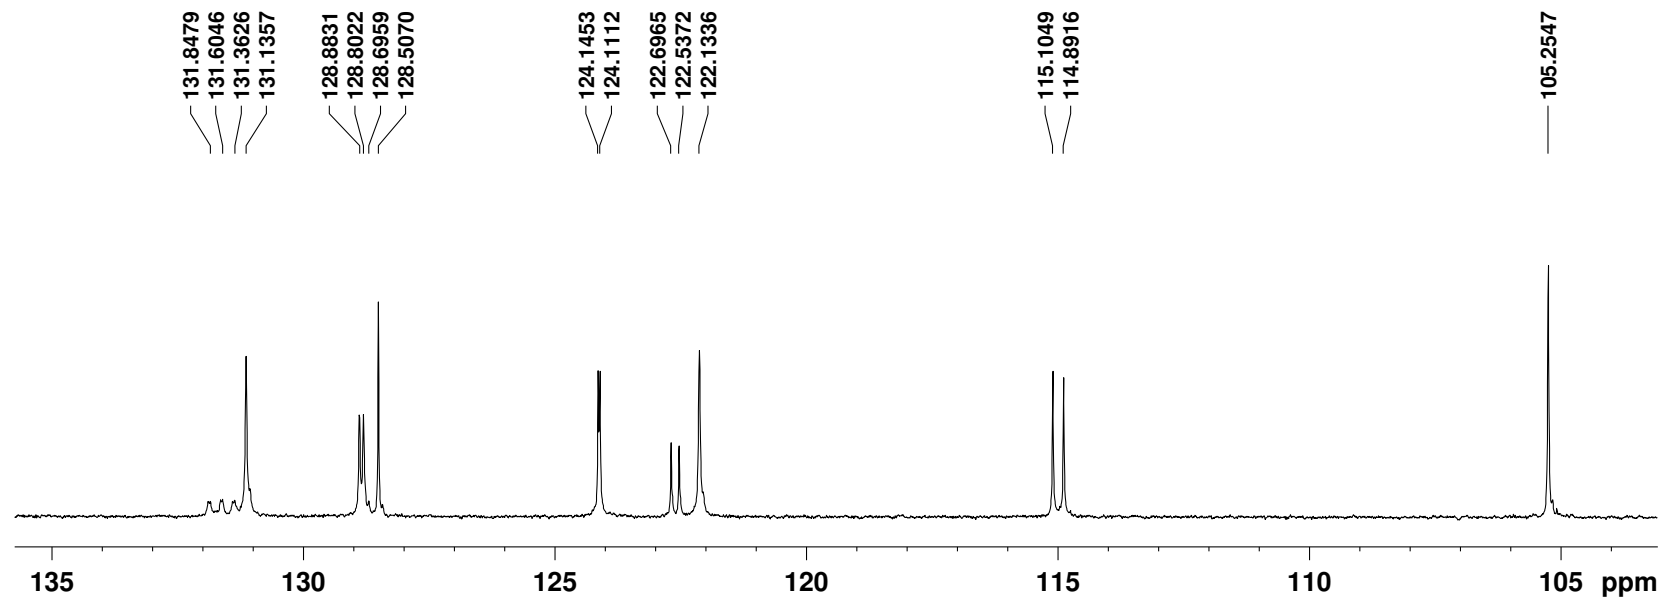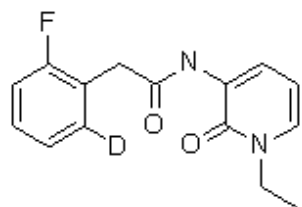

2t

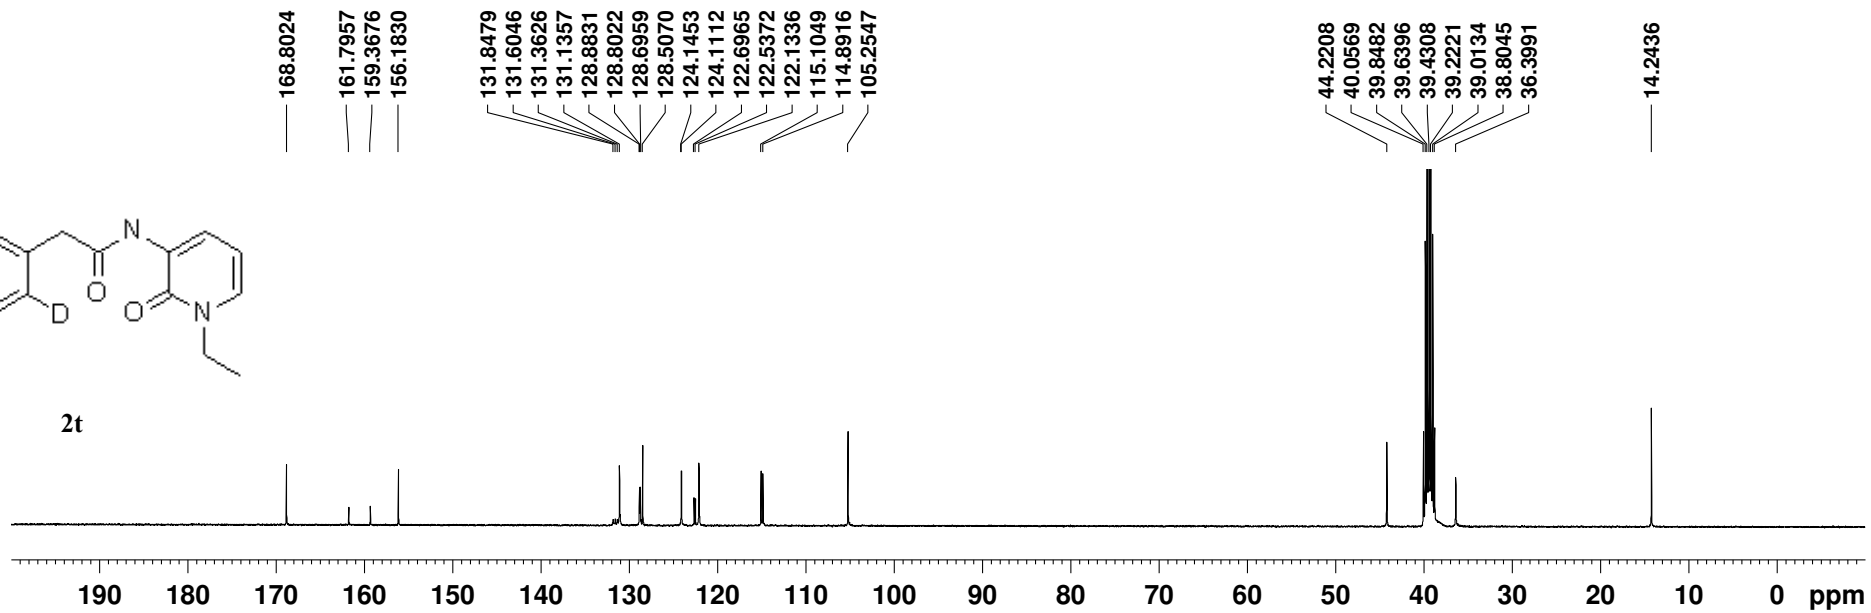

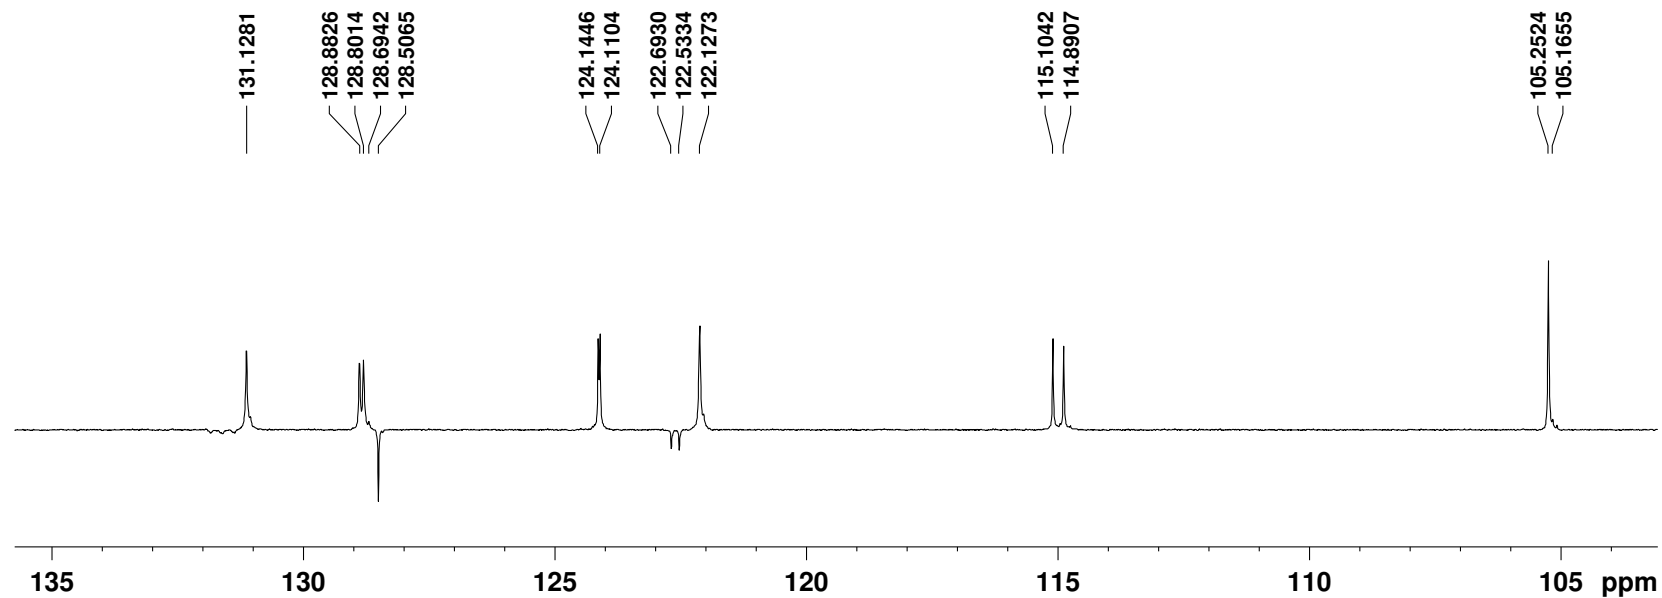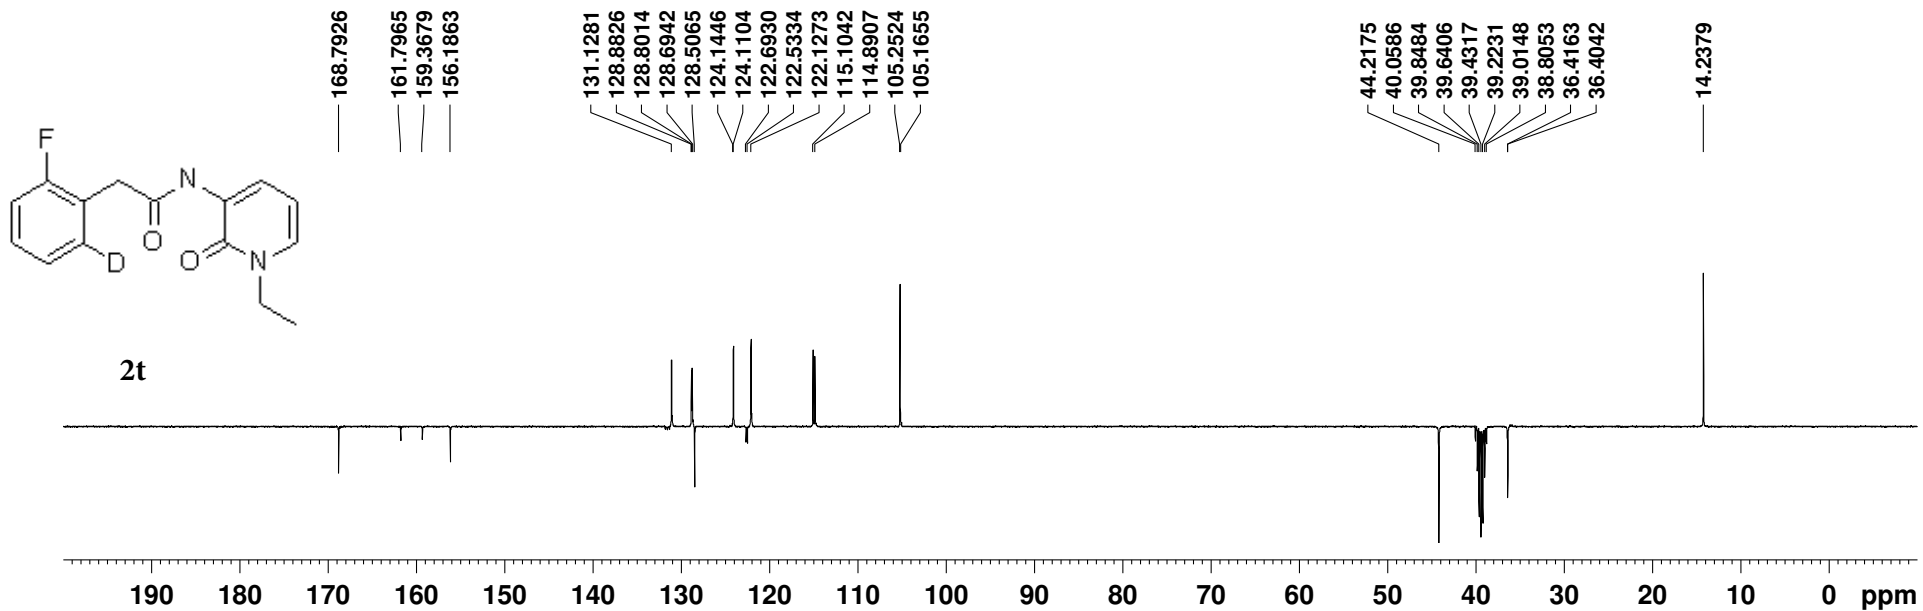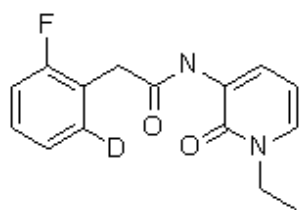

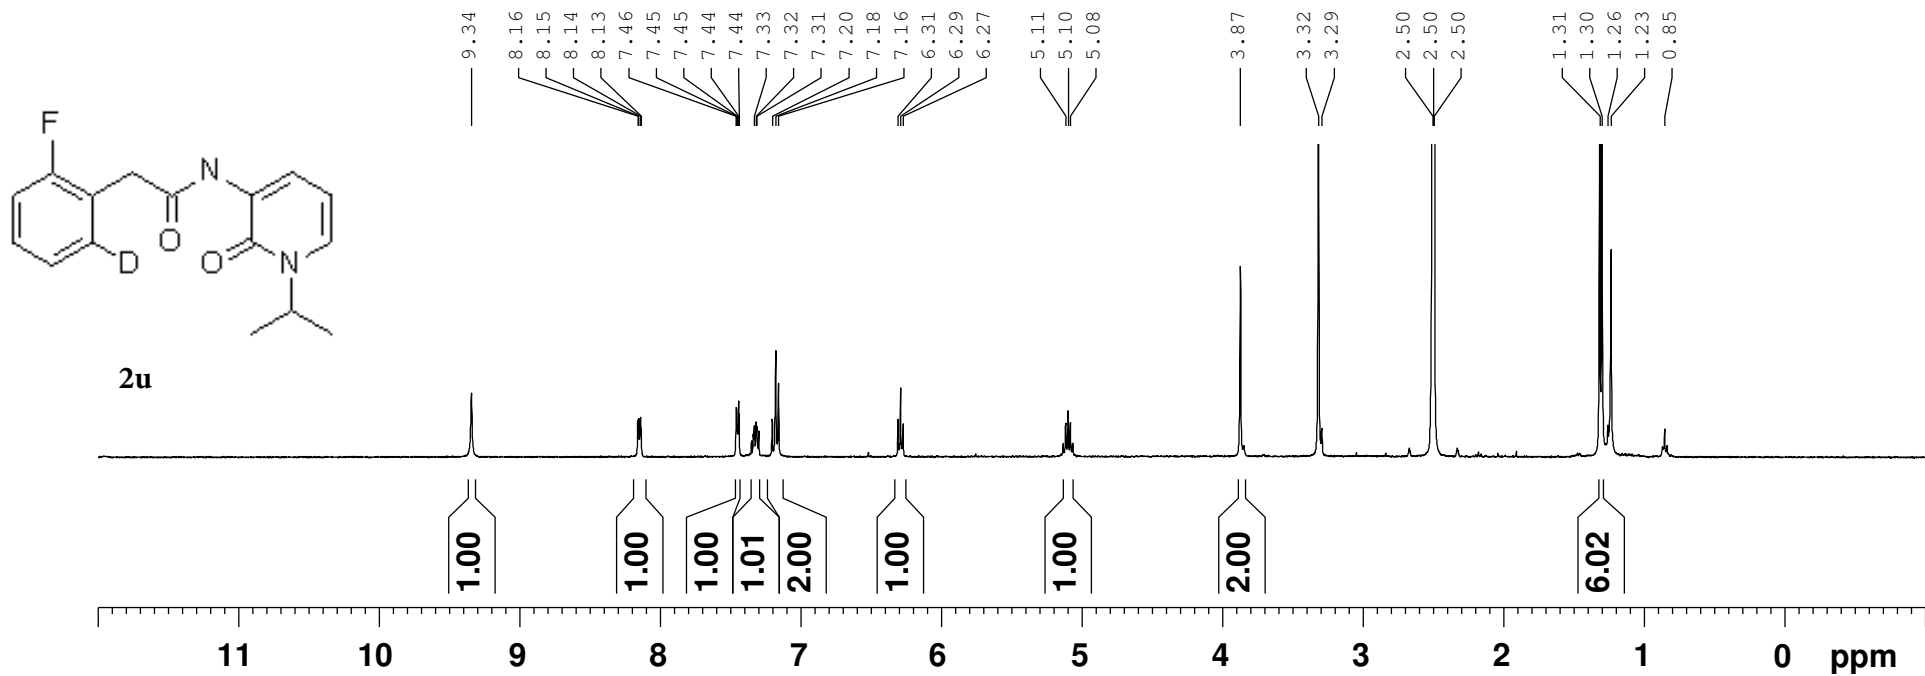

<sup>1</sup>H NMR of **2u** IN DMSO

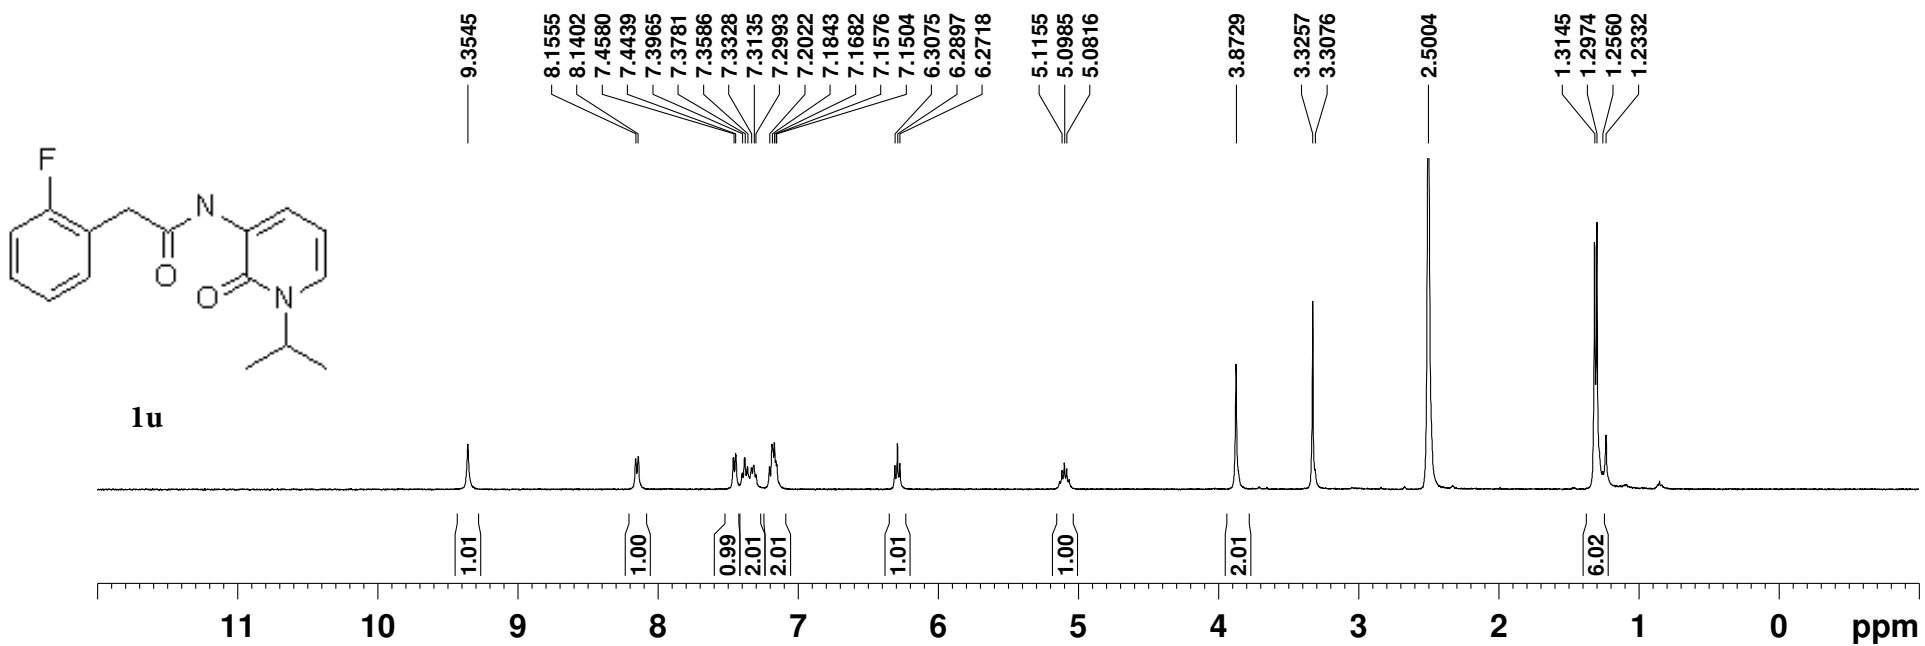

<sup>1</sup>H NMR of **1u** IN DMSO

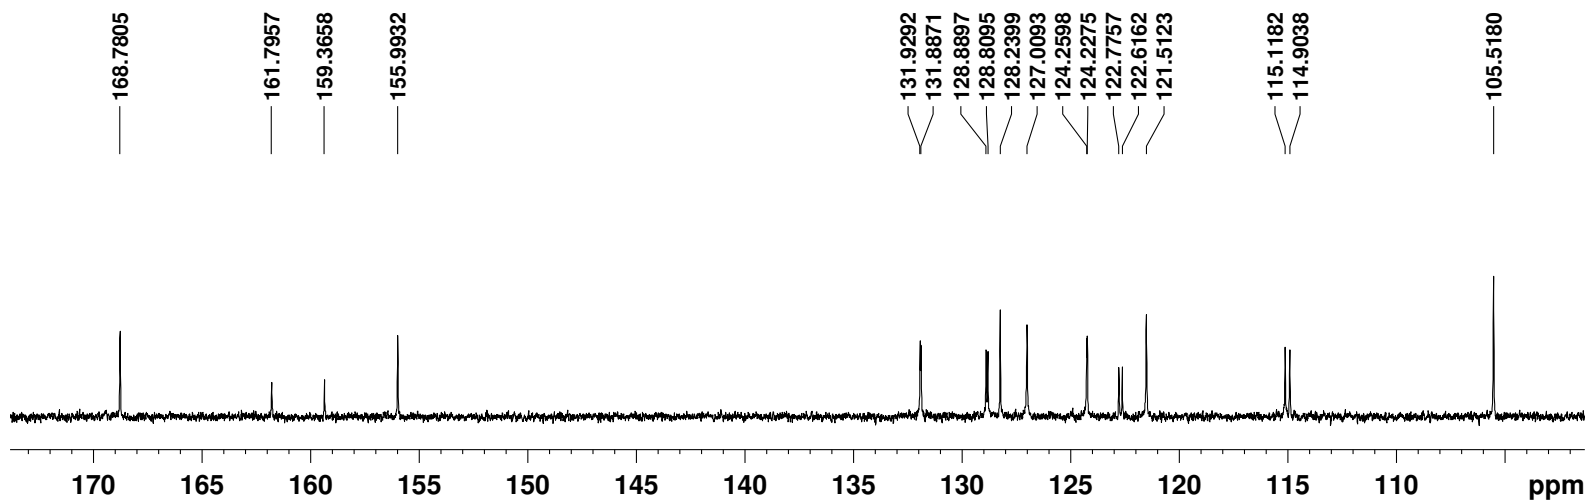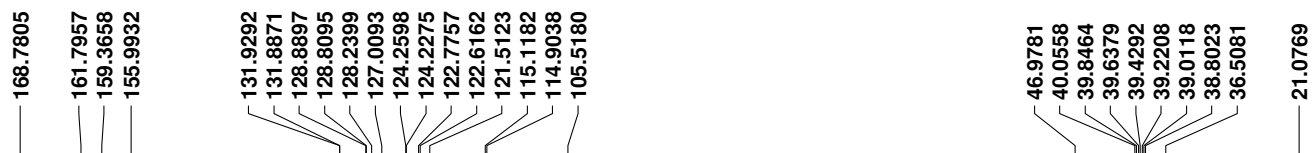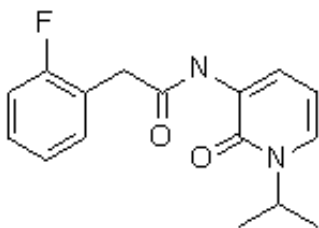

1u

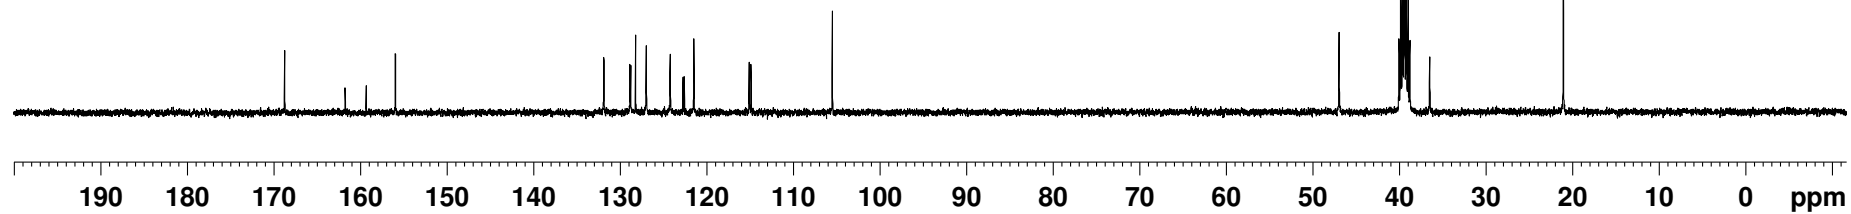

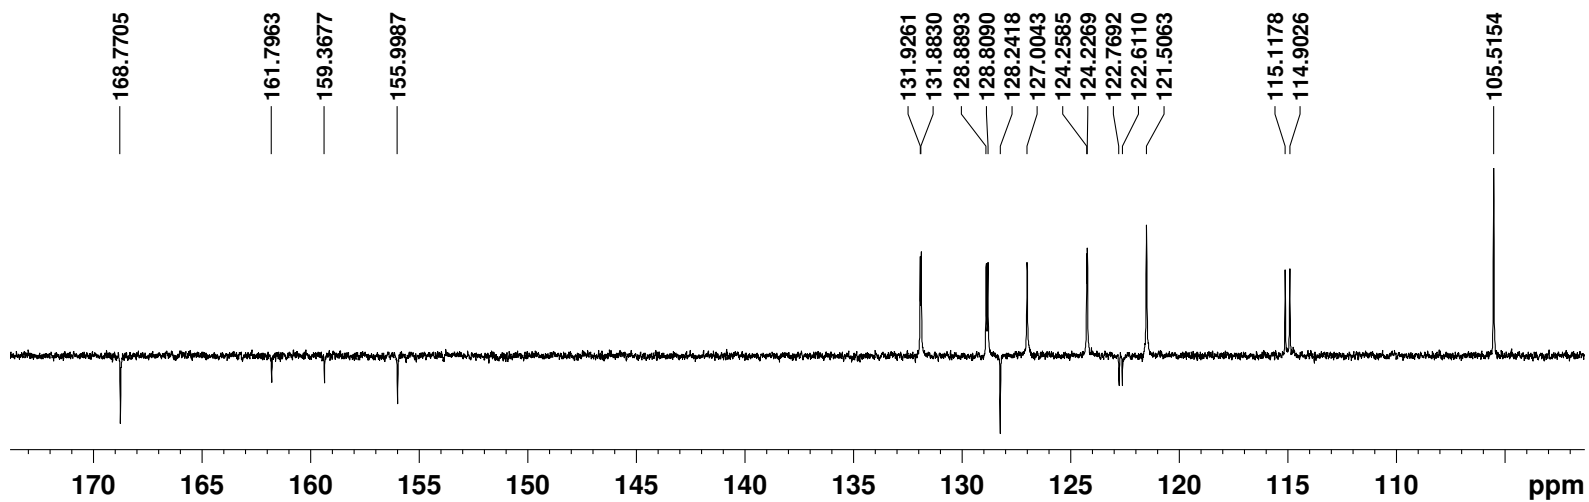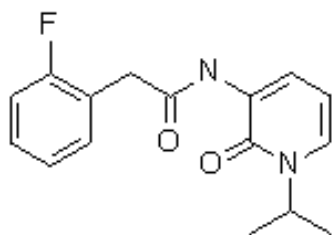

1u

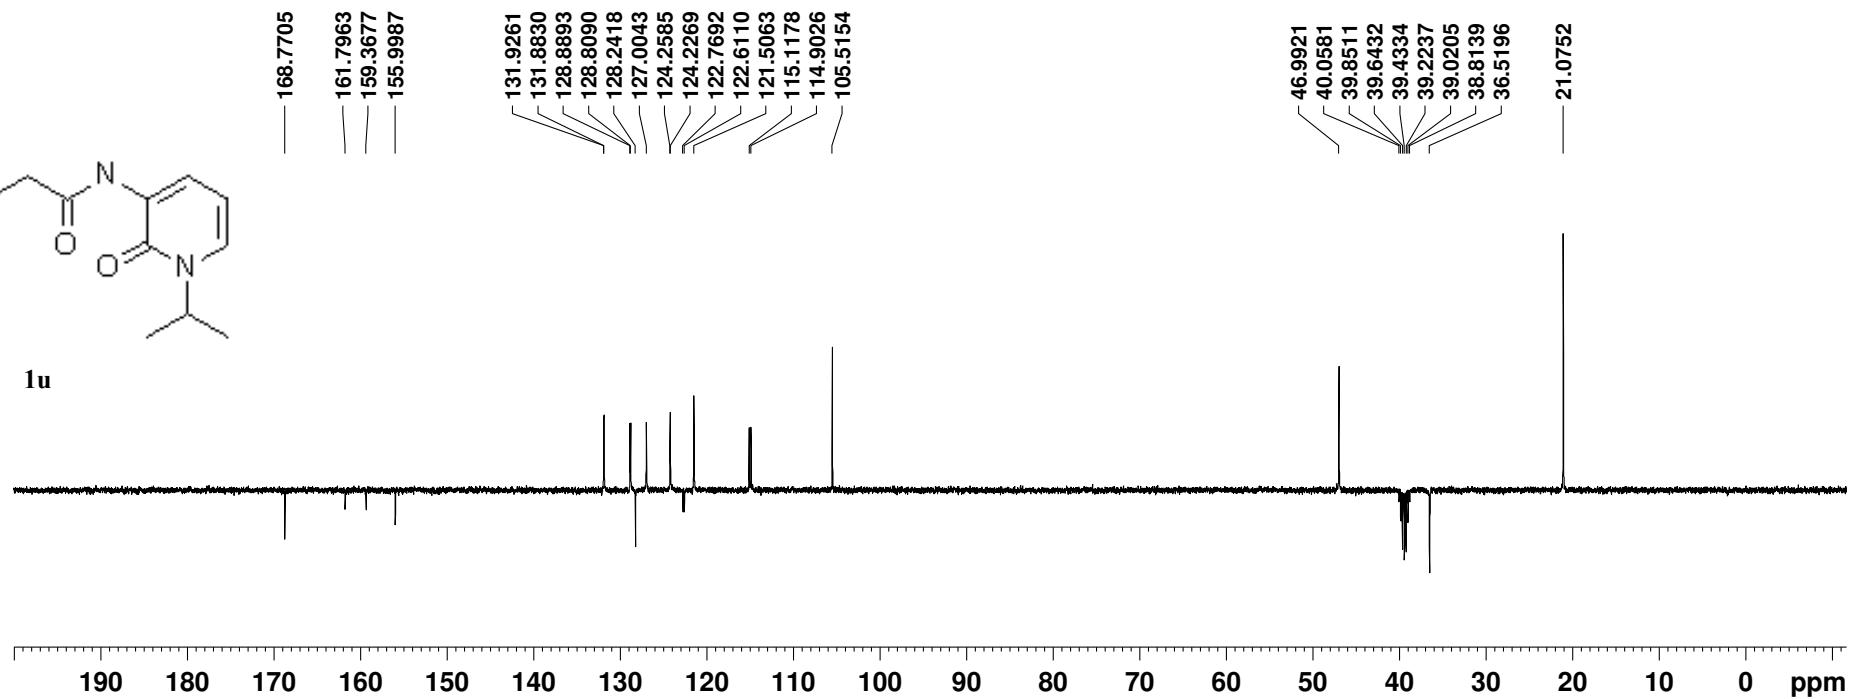

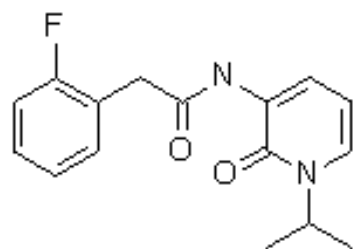

**1u**

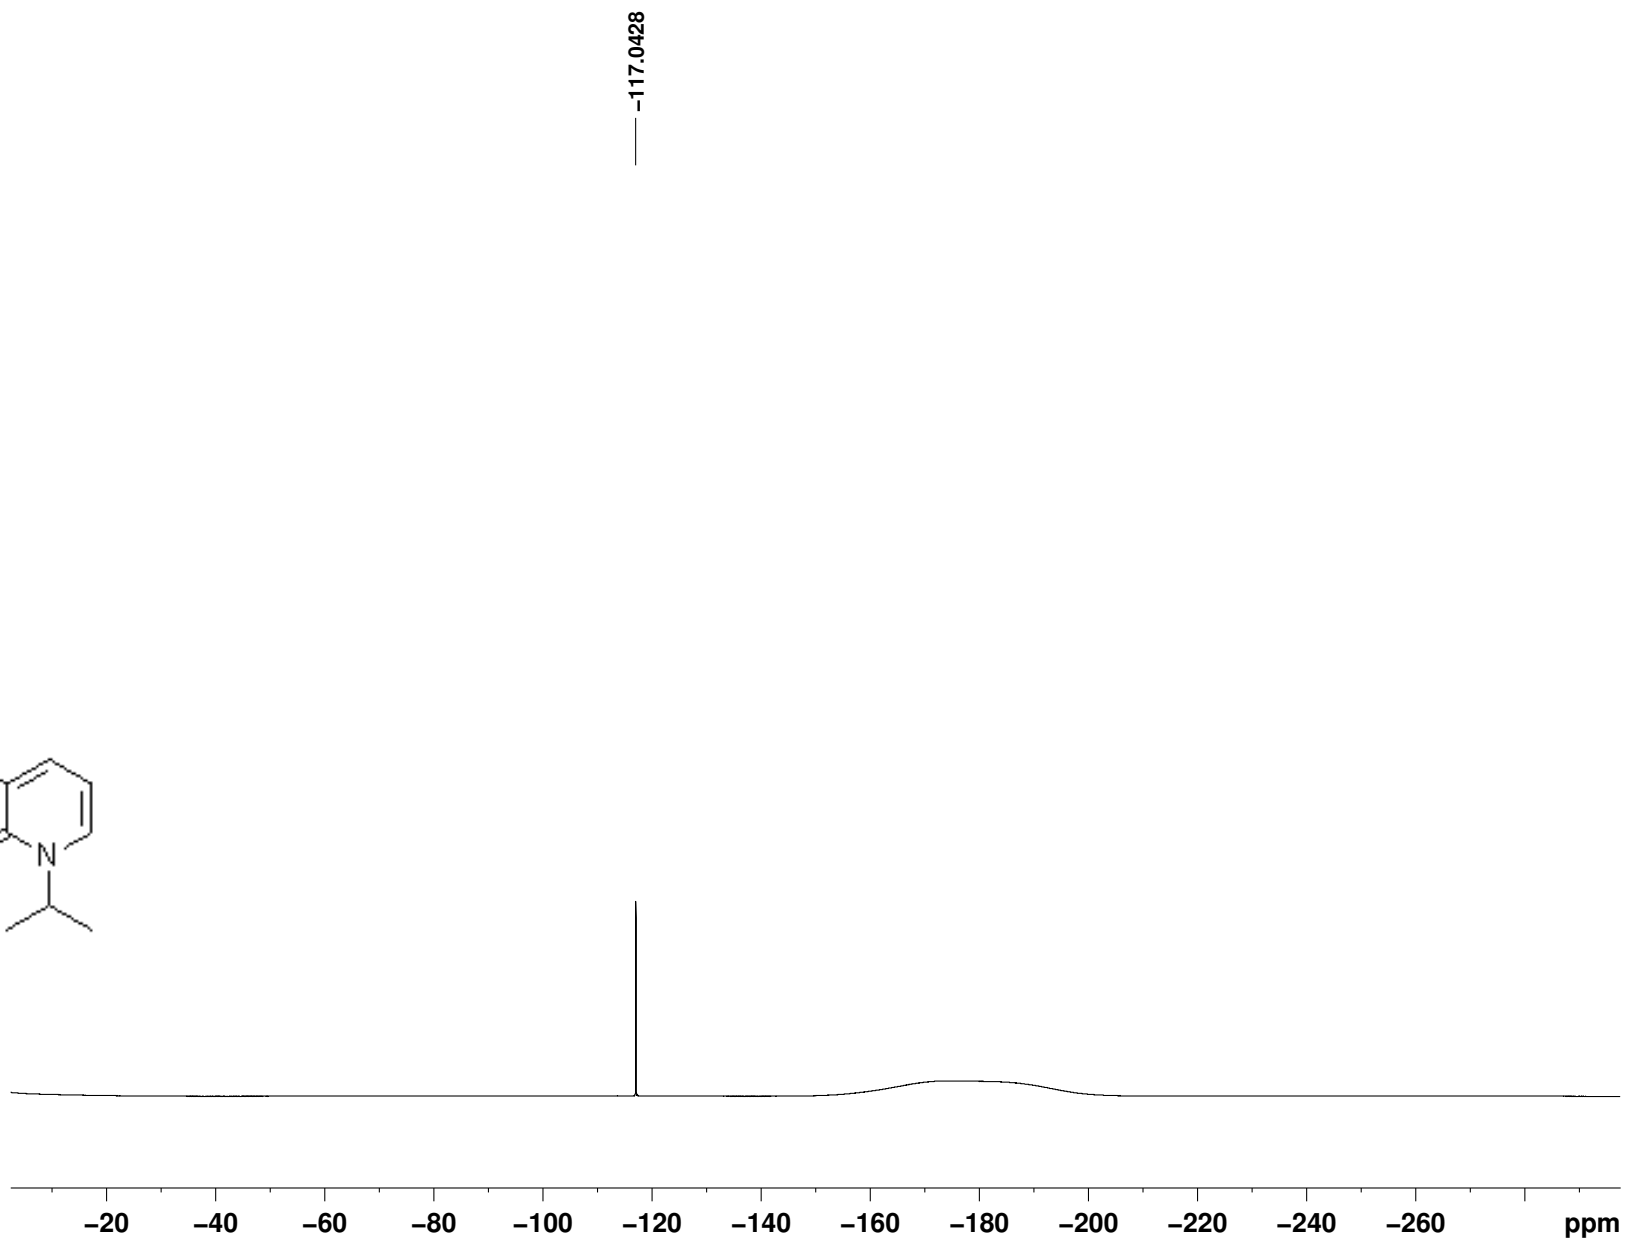



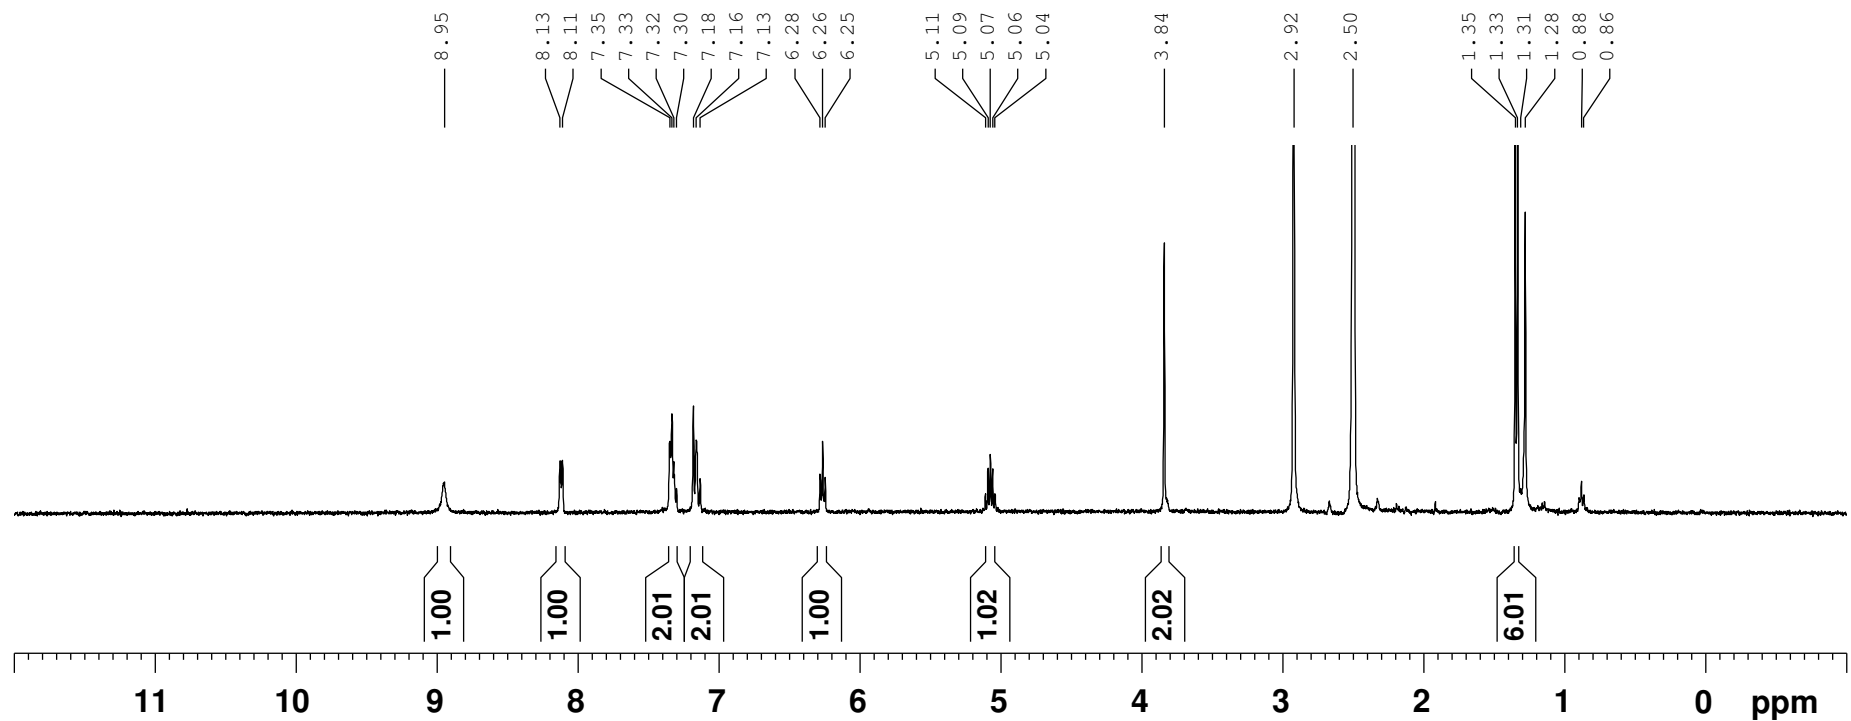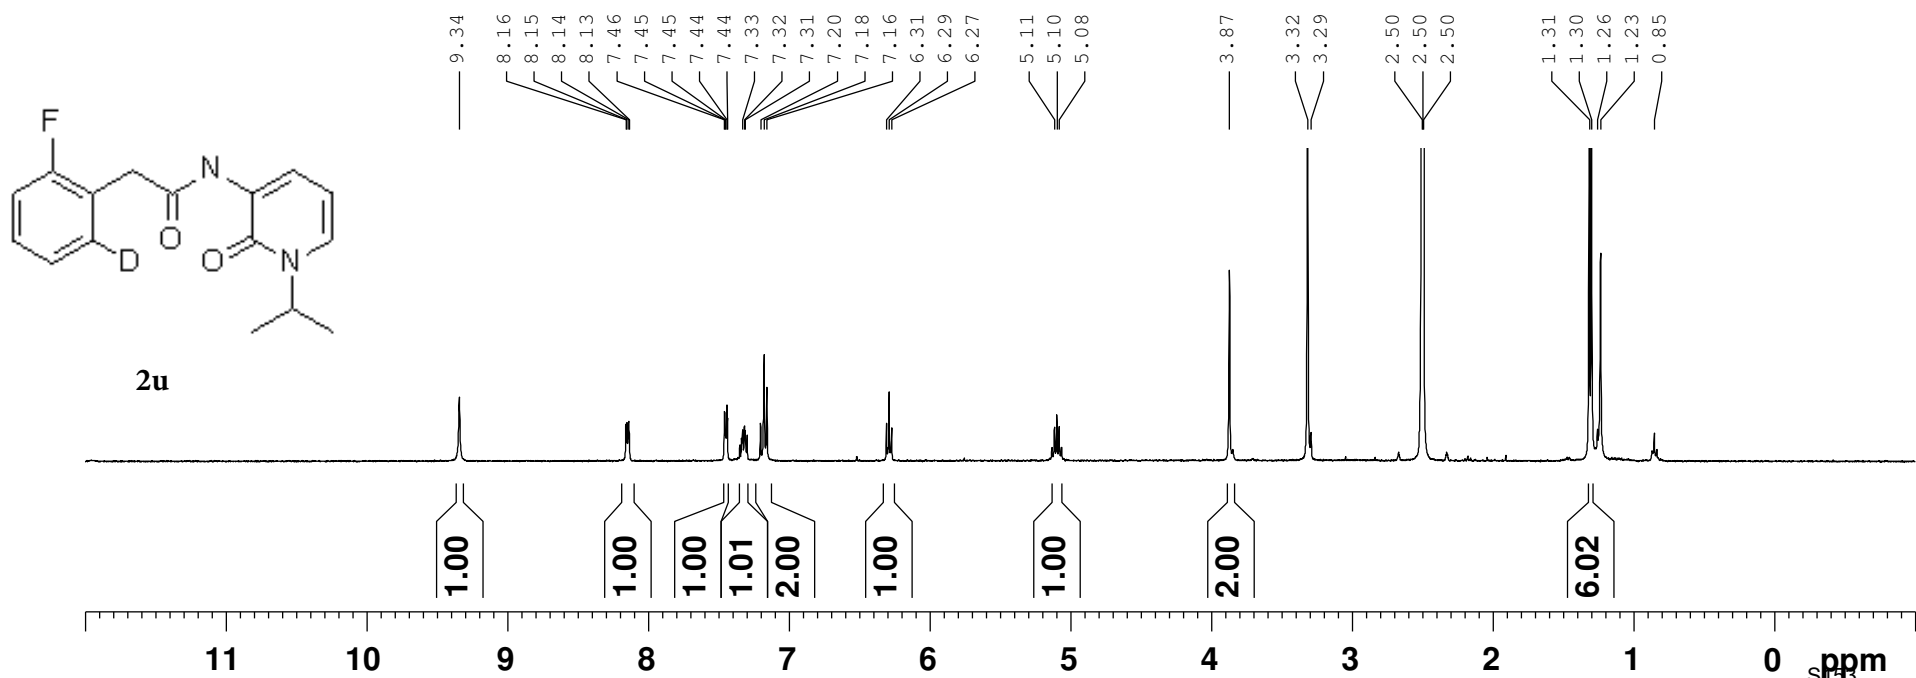

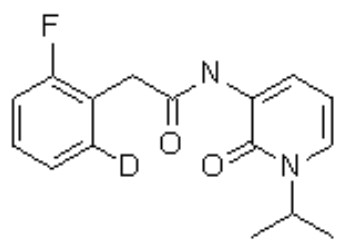

2u

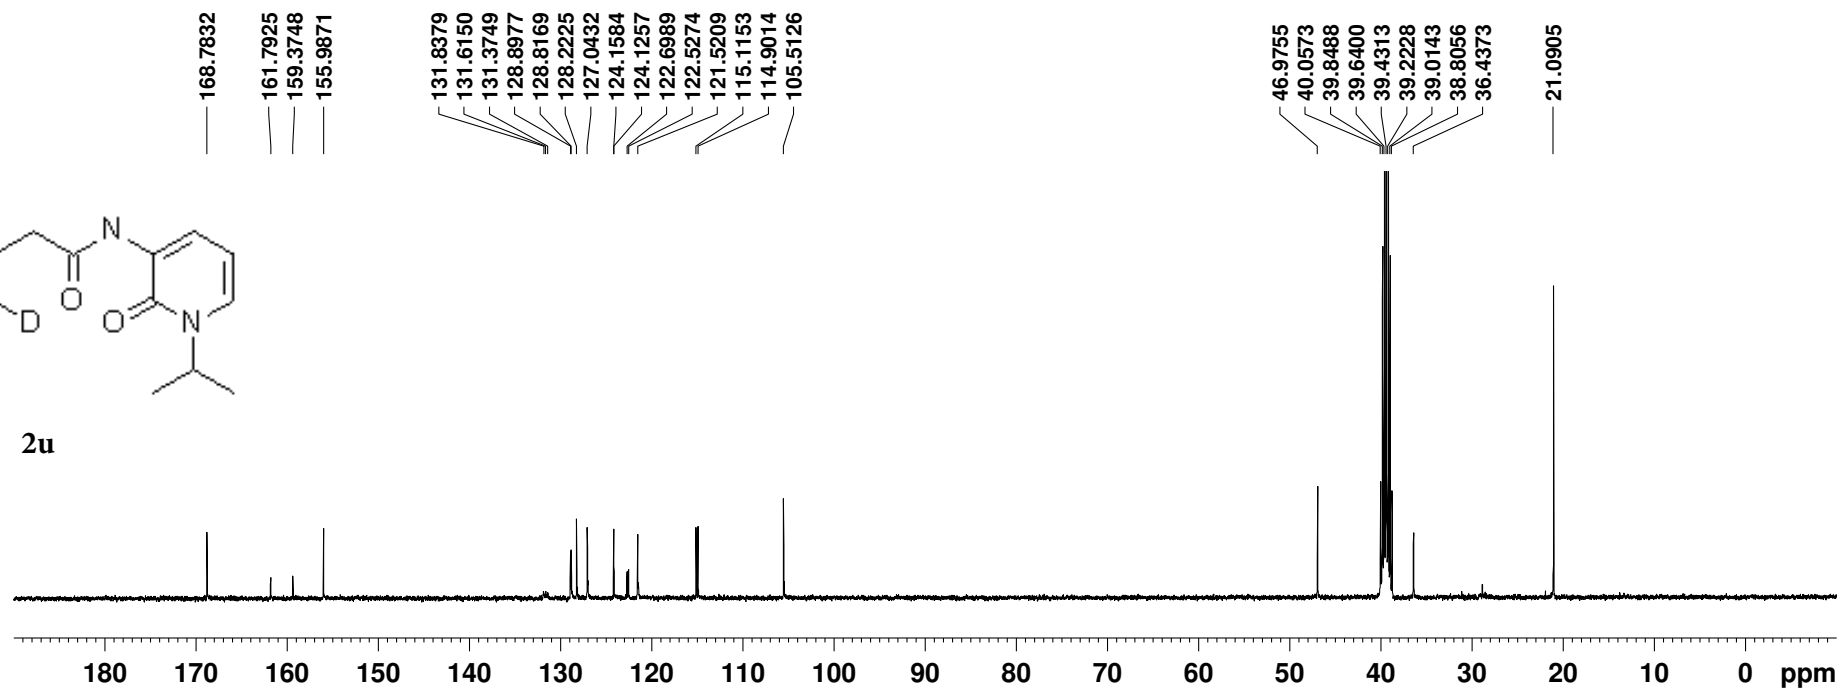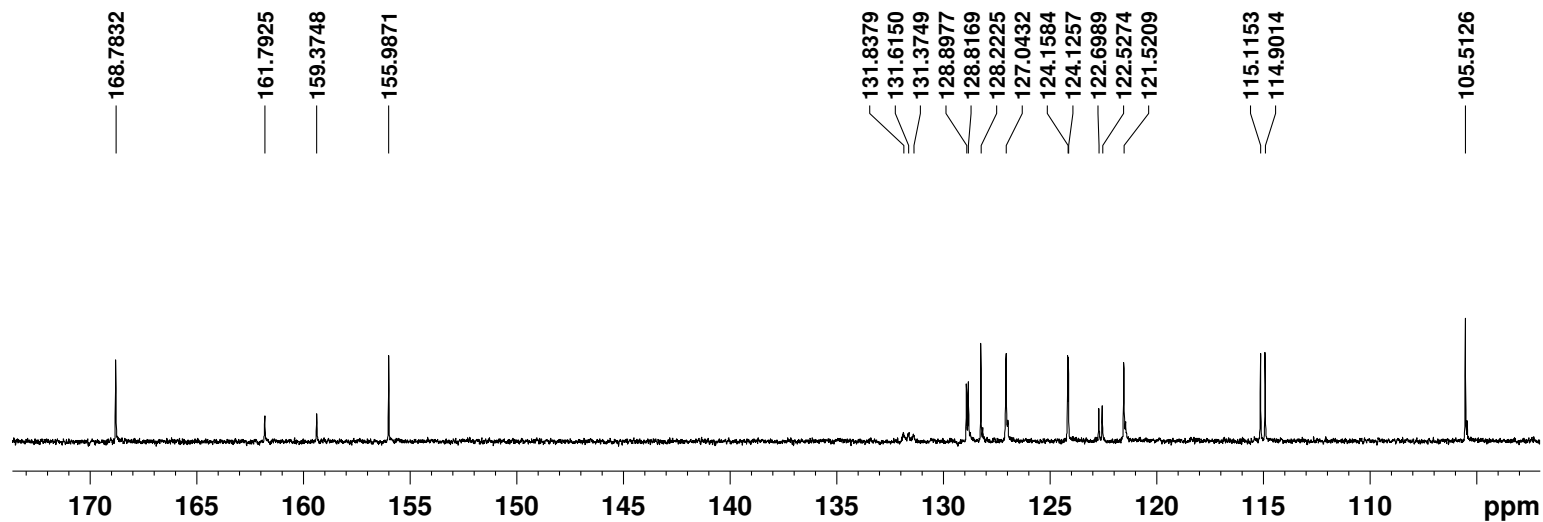

13C NMR of 2u IN DMSO

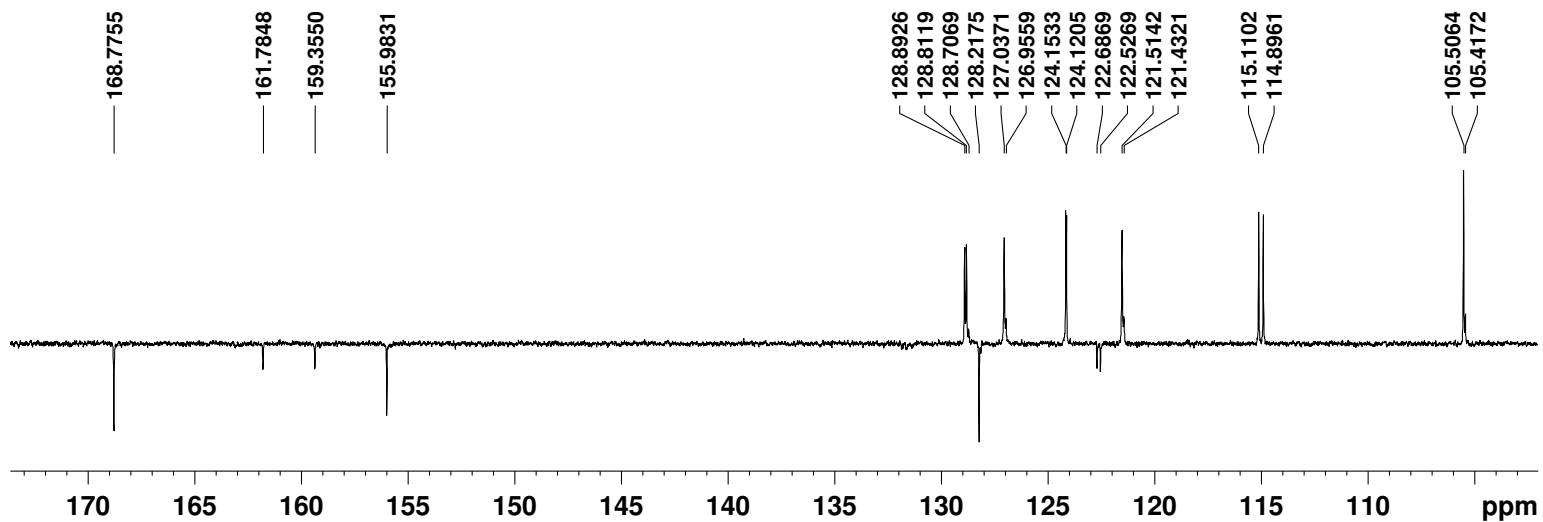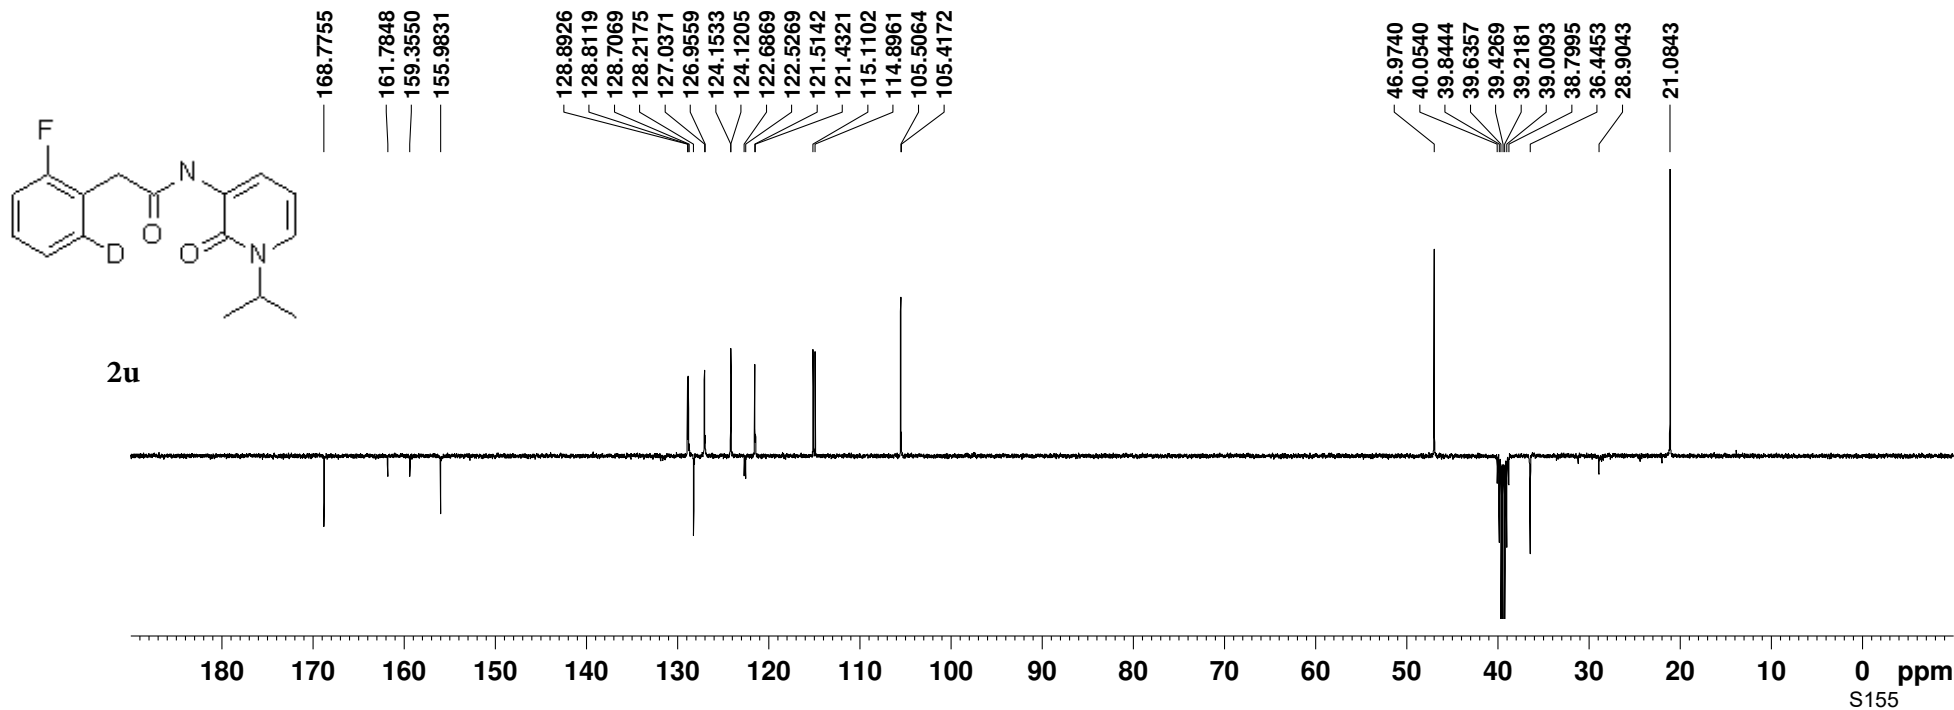

APT of 2u IN DMSO

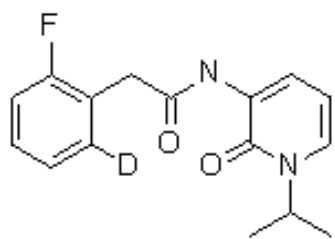

**2u**

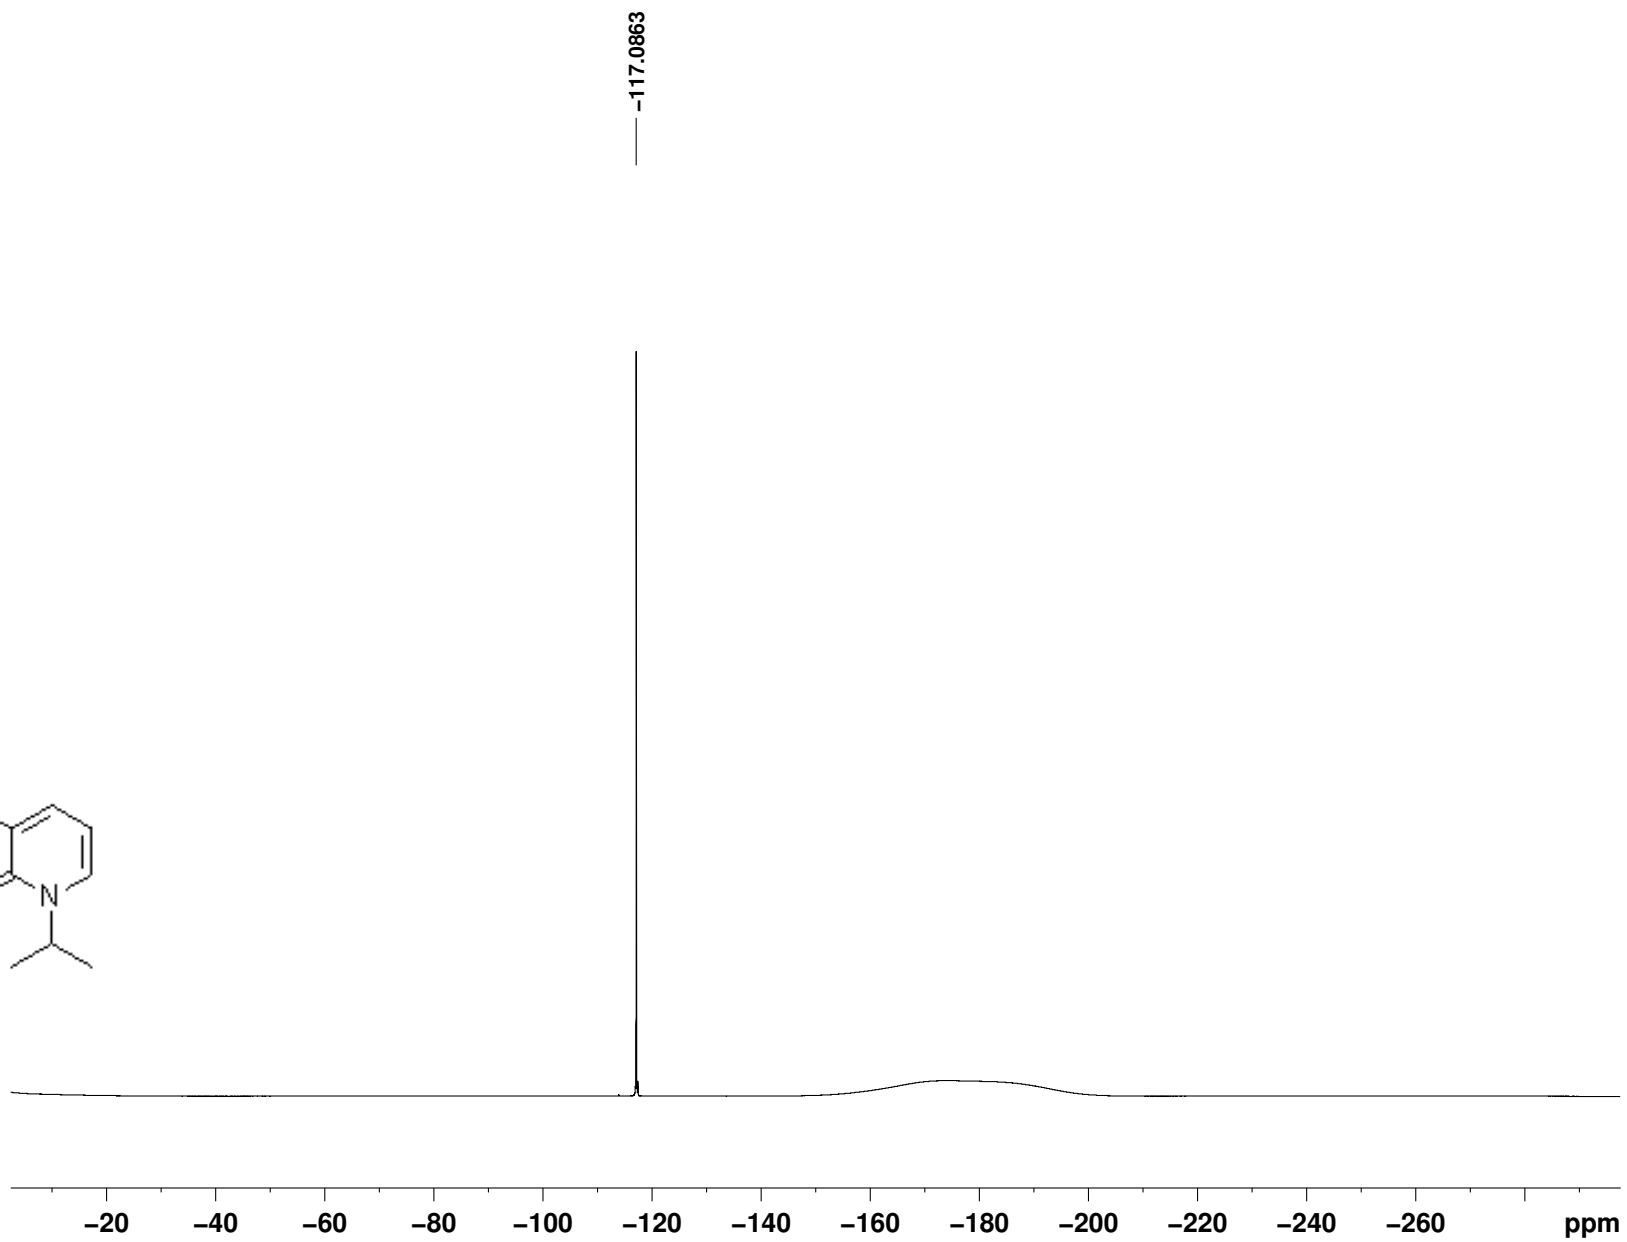

$^{19}\text{F}$  NMR of 2u IN DMSO

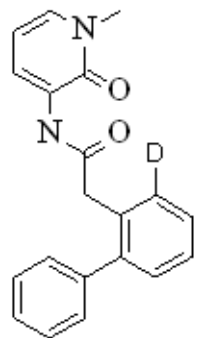

2v

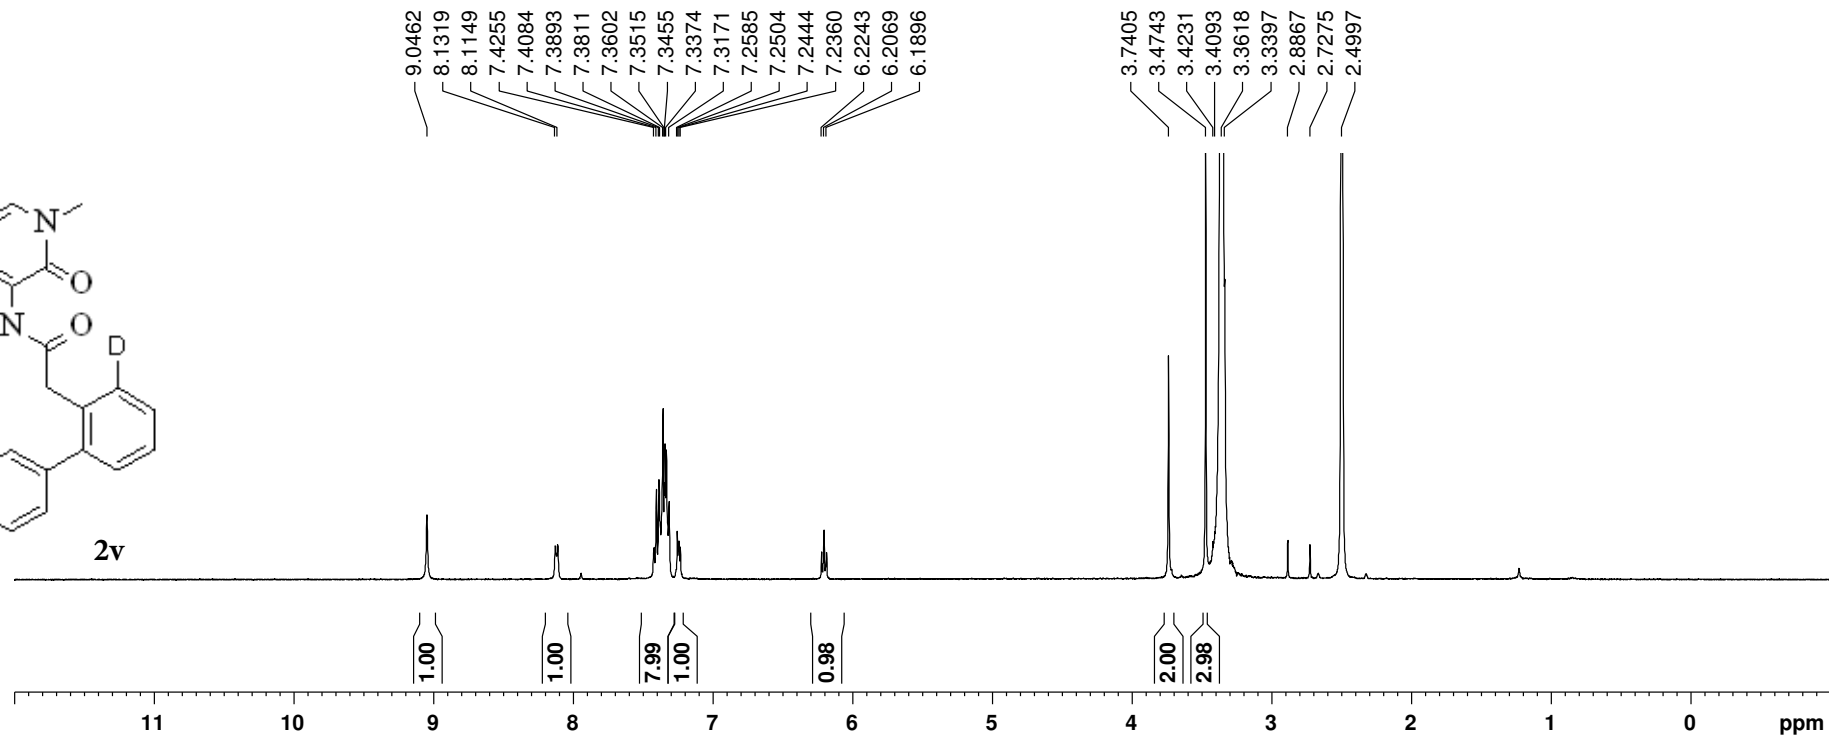

<sup>1</sup>H NMR of 2v IN DMSO

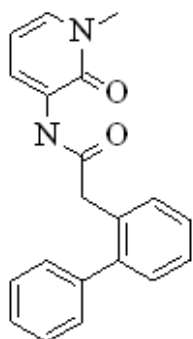

1v

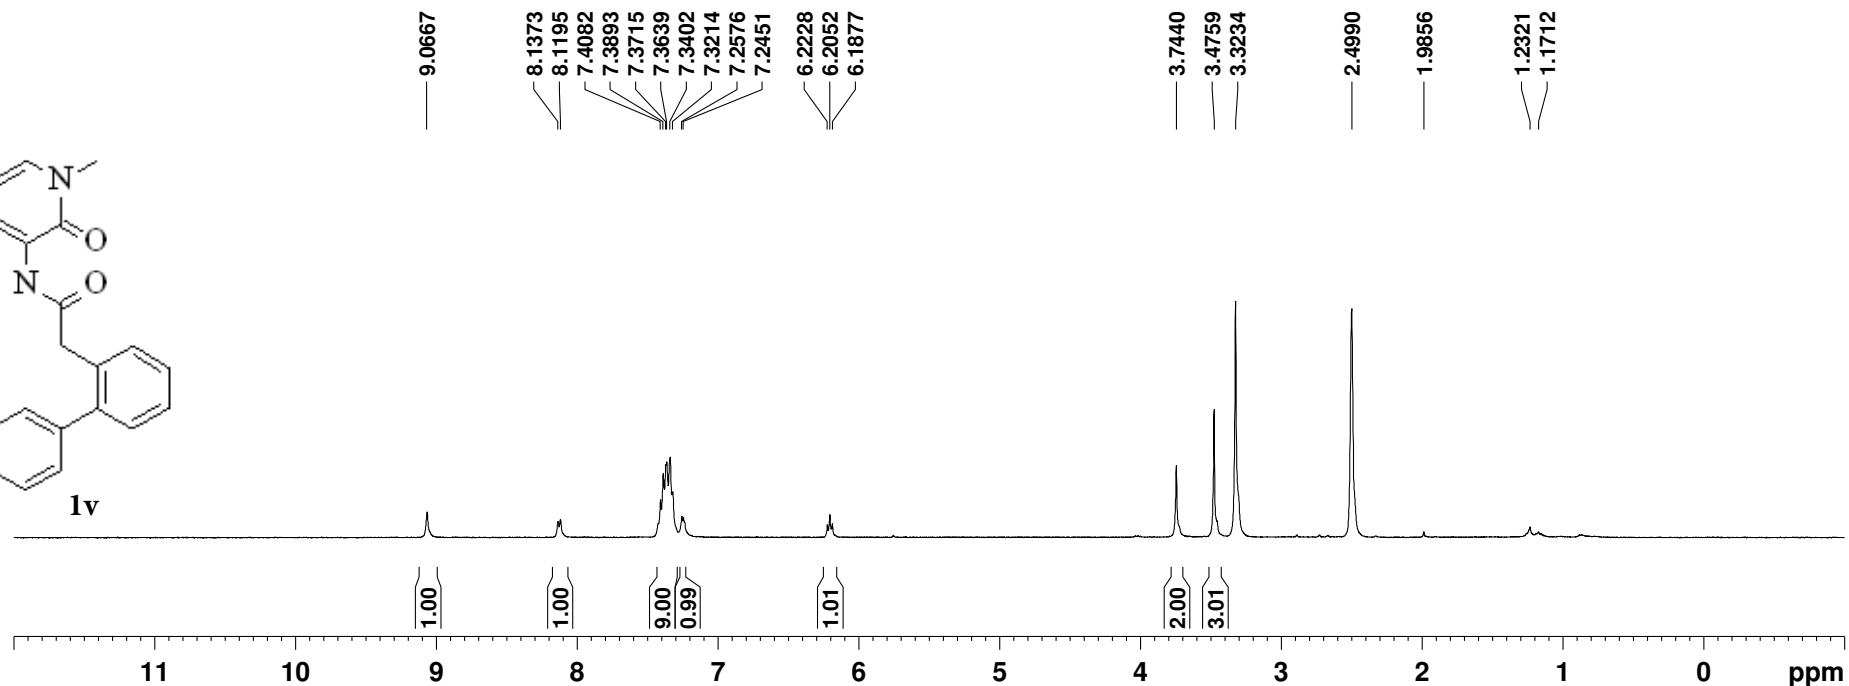

<sup>1</sup>H NMR of 1v IN DMSO

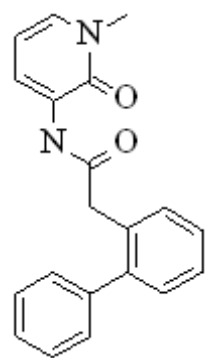

1v

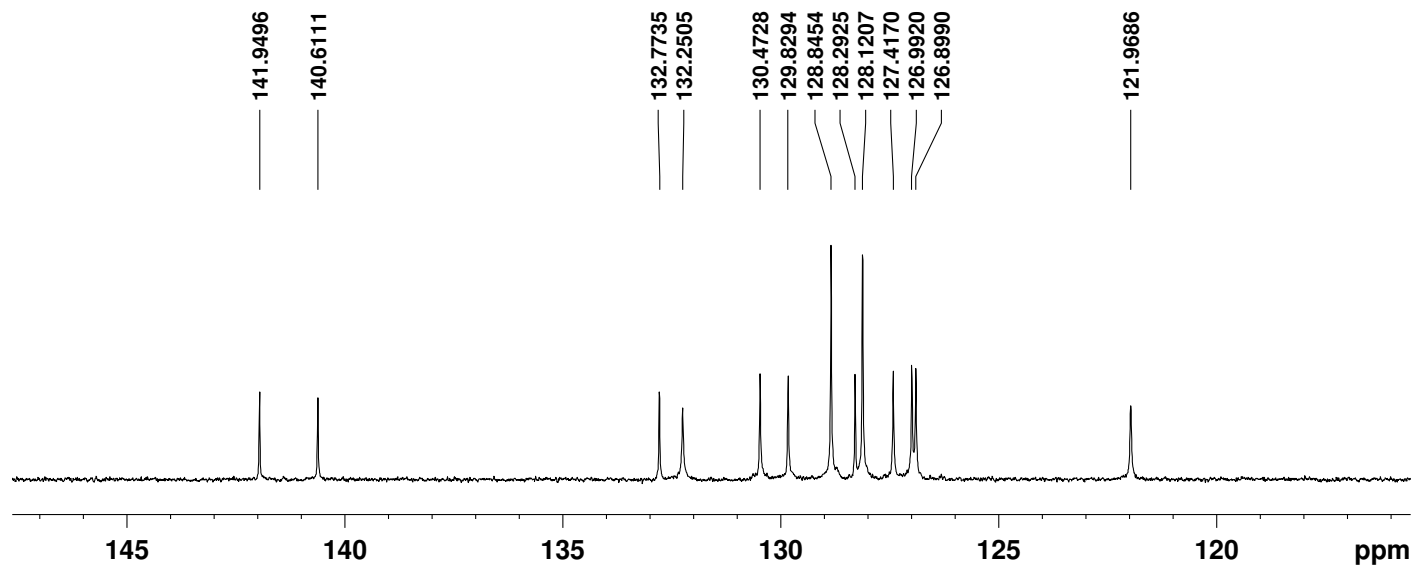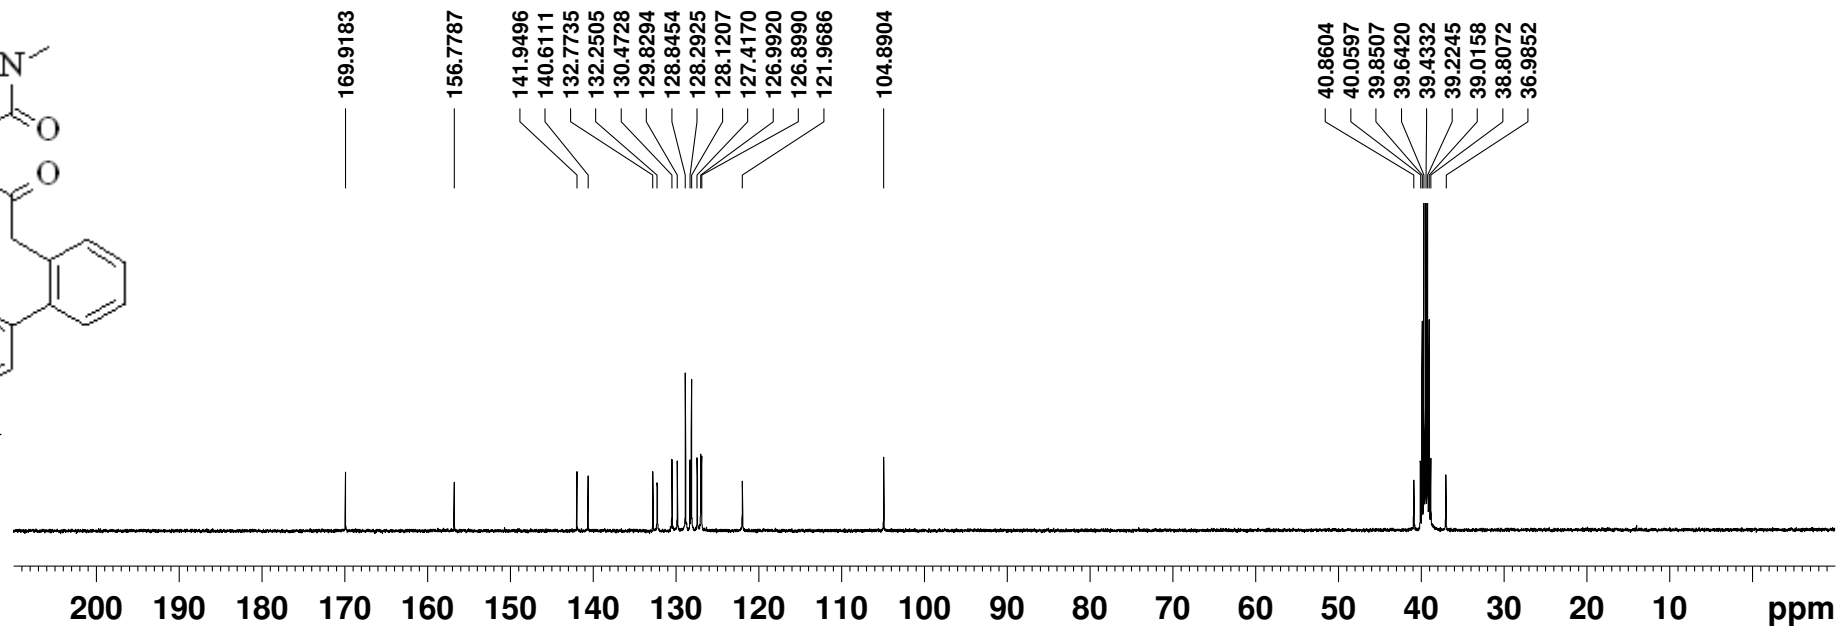

<sup>13</sup>C NMR of 1v IN DMSO

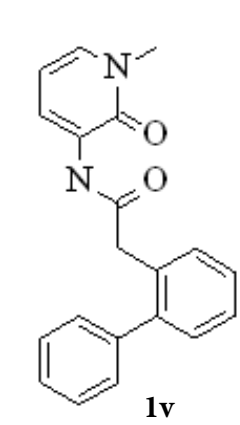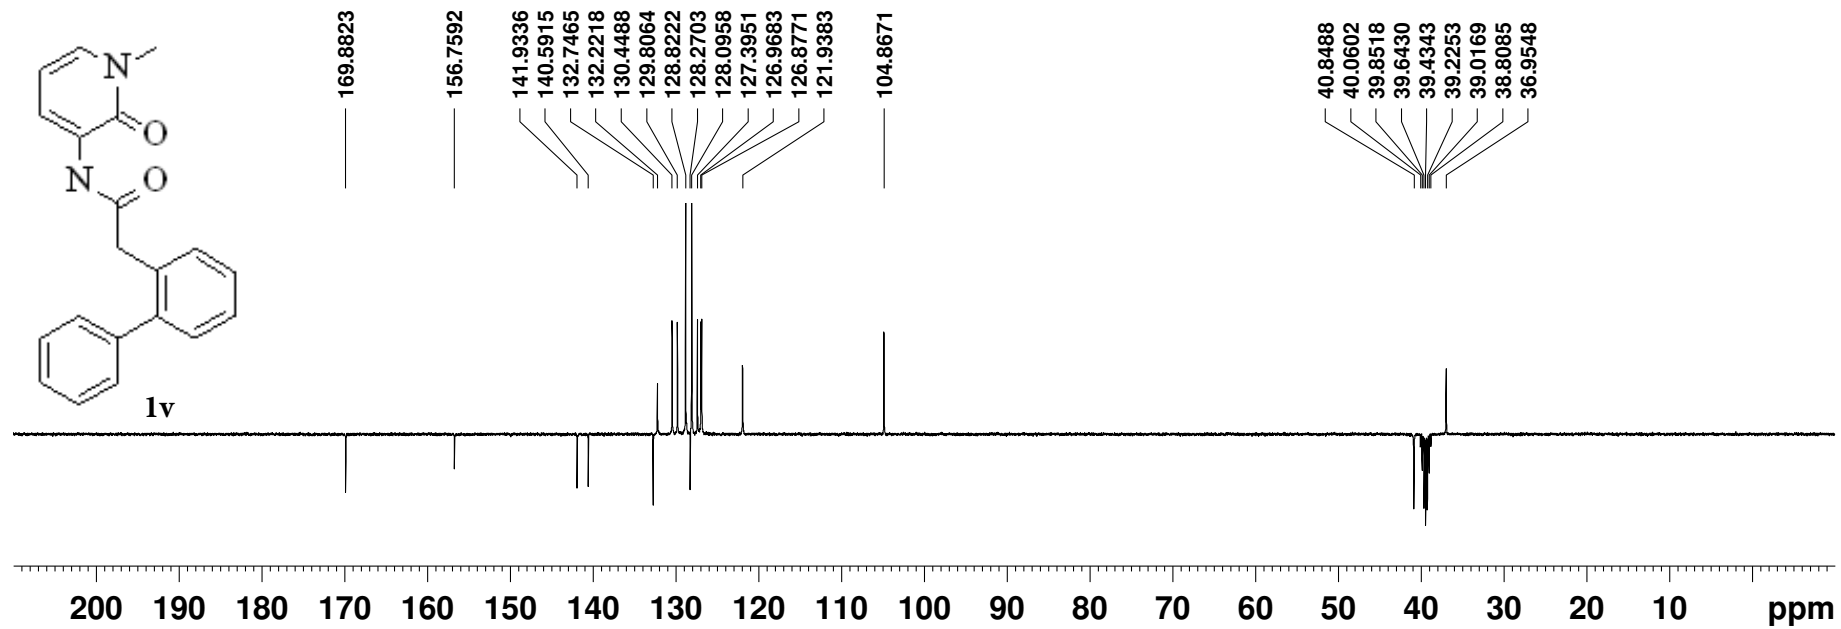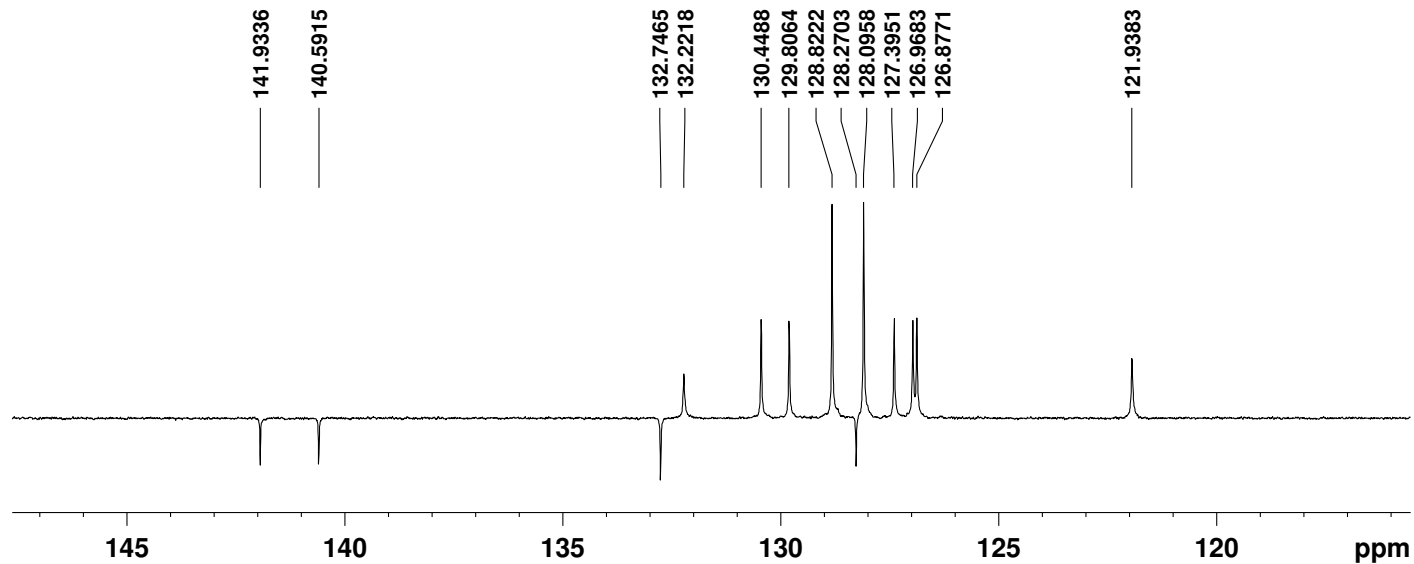

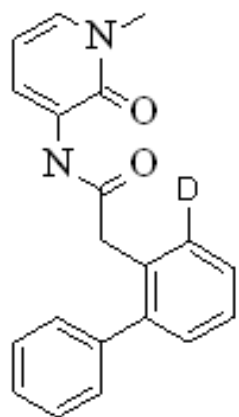

2v

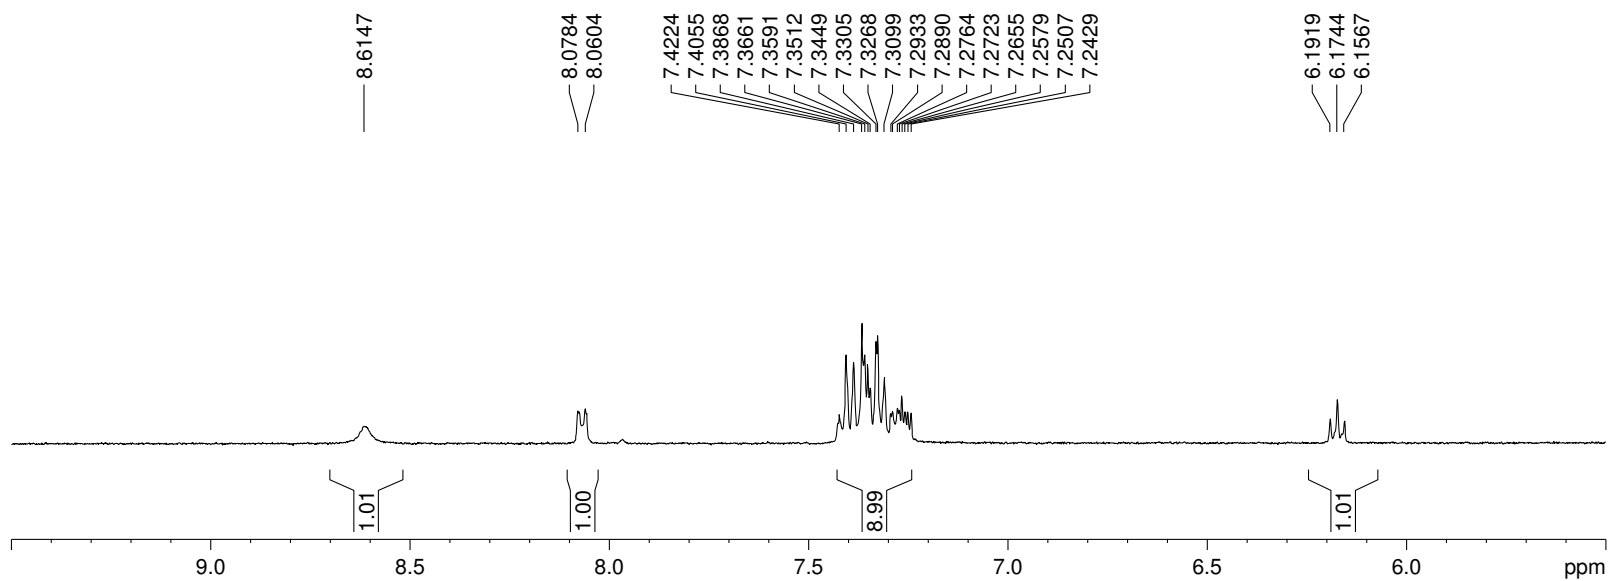

<sup>1</sup>H NMR of 2v IN DMSO AT 100°C

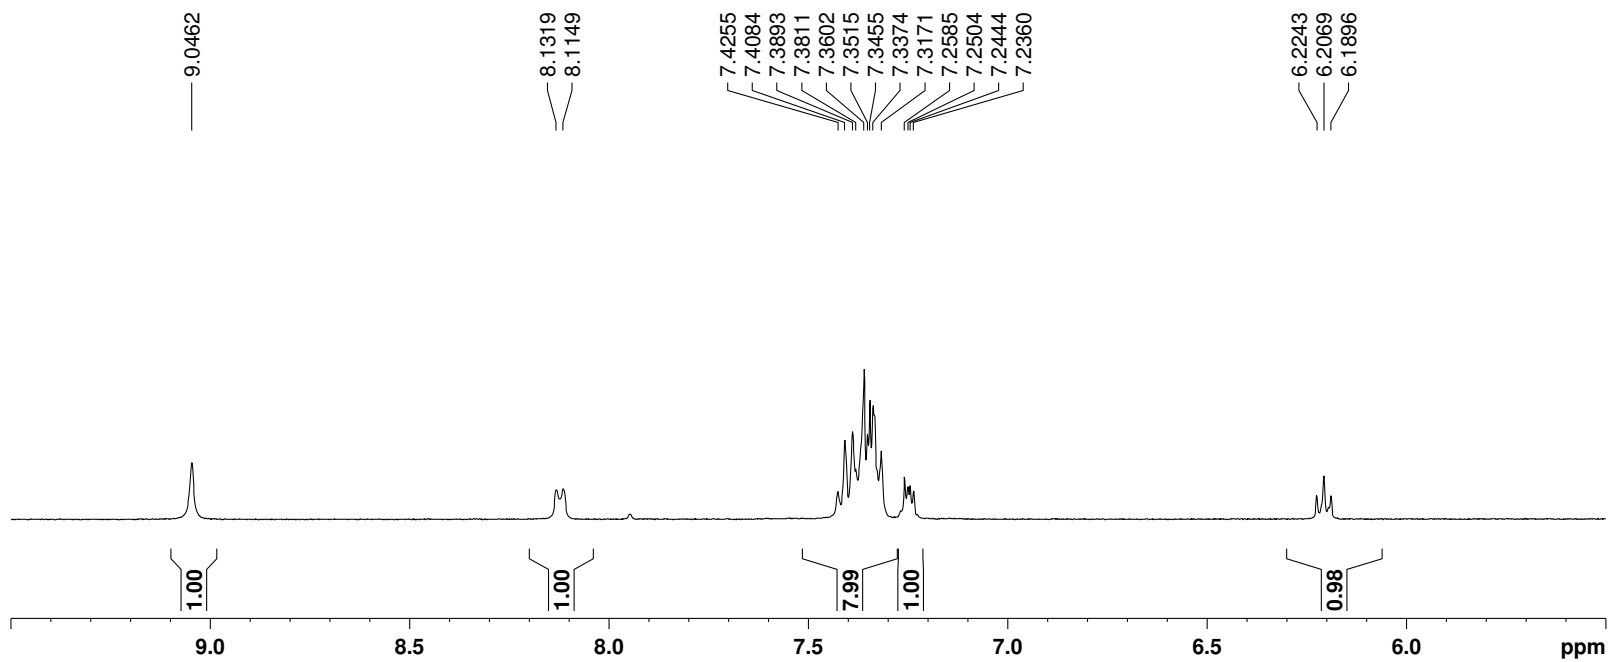

<sup>1</sup>H NMR of 2v IN DMSO AT 20°C



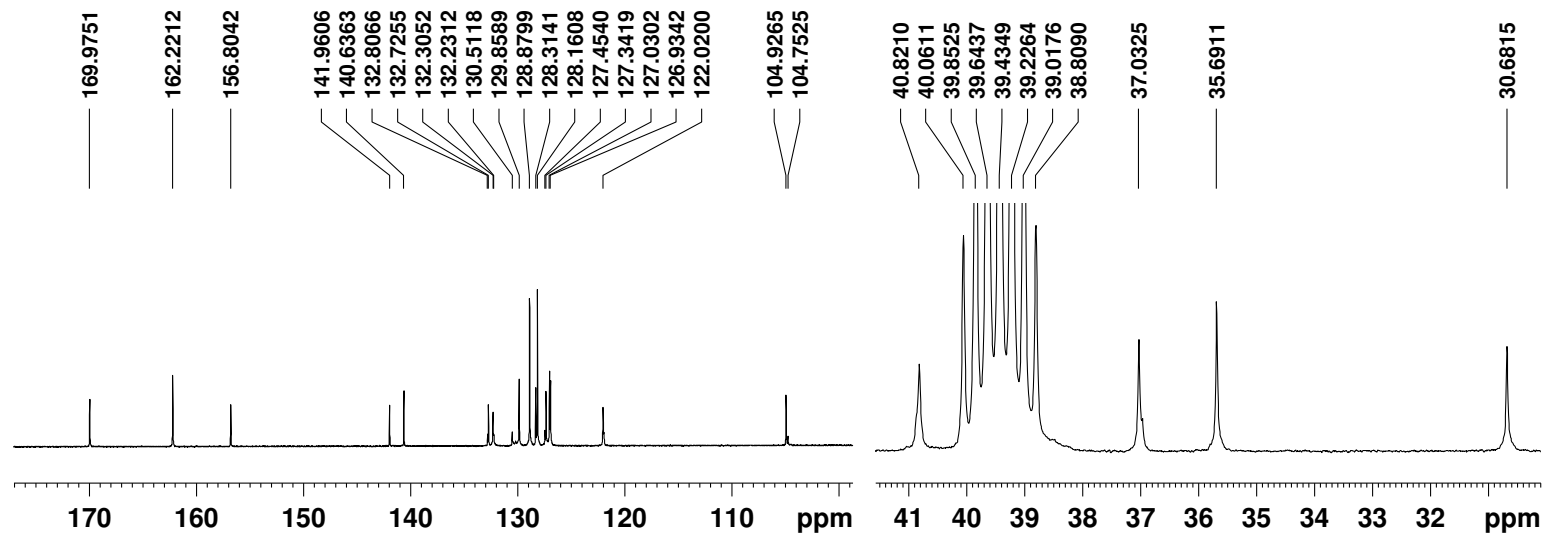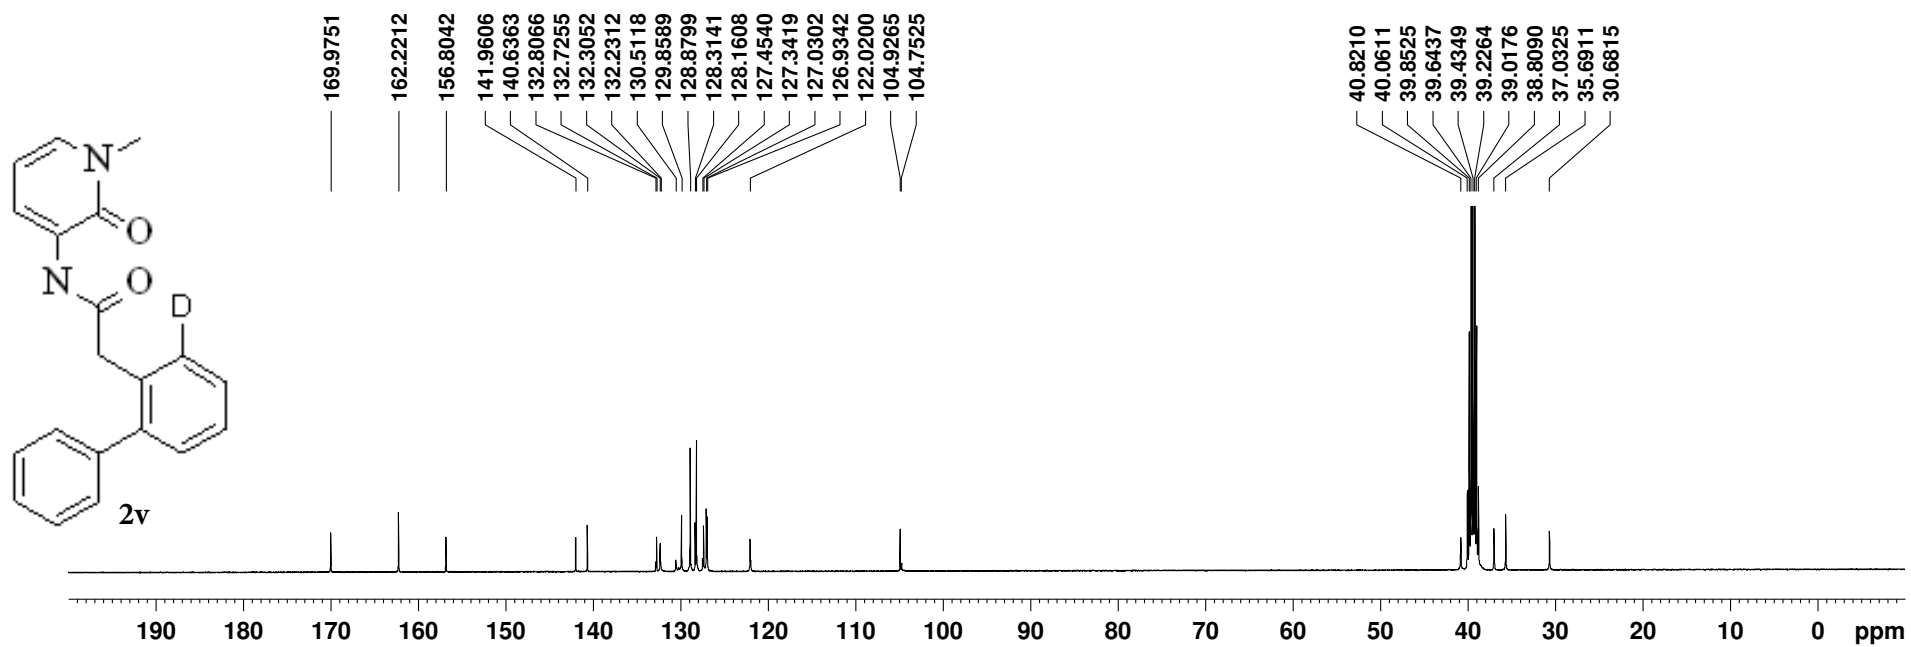

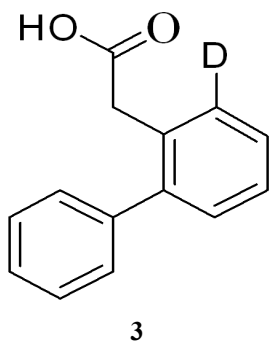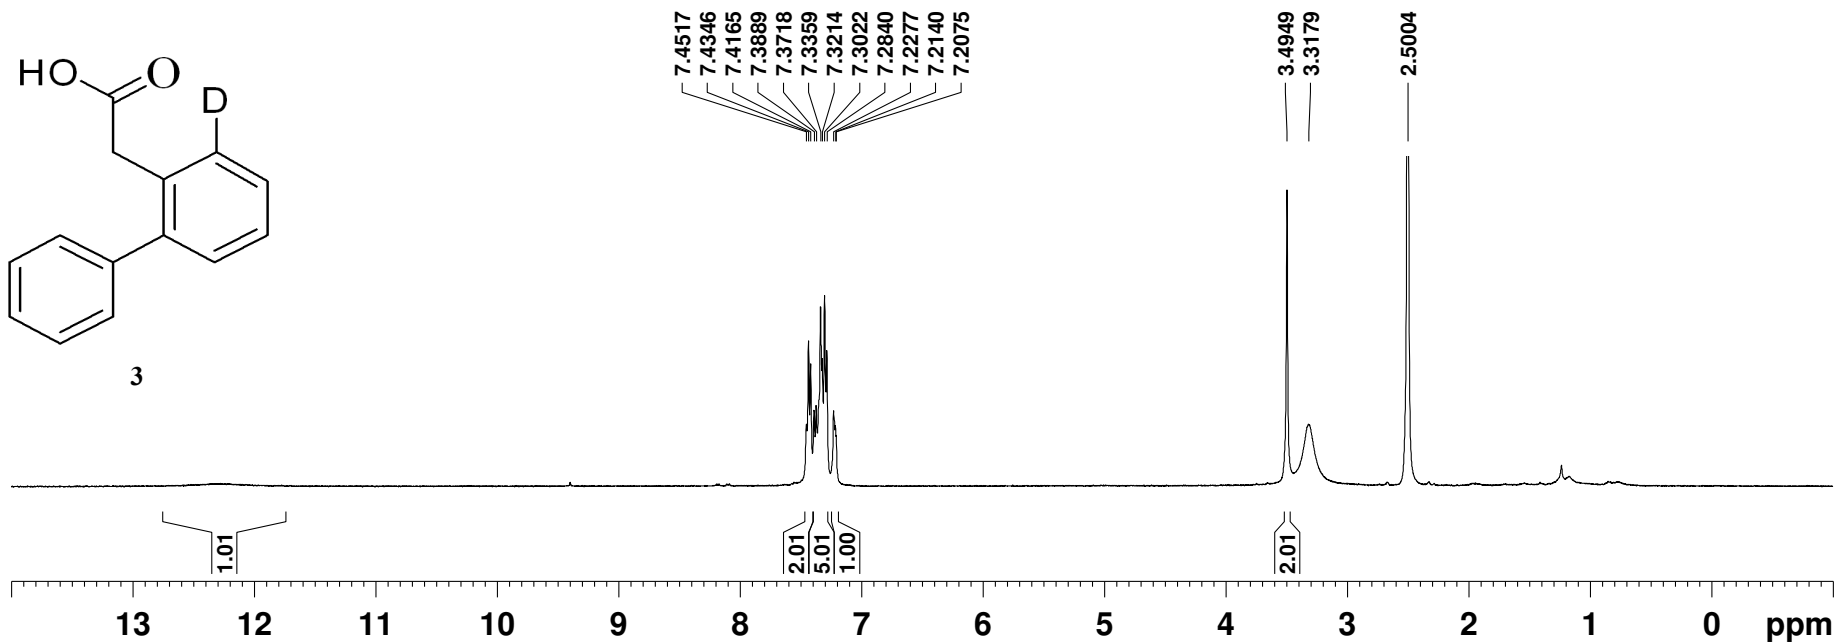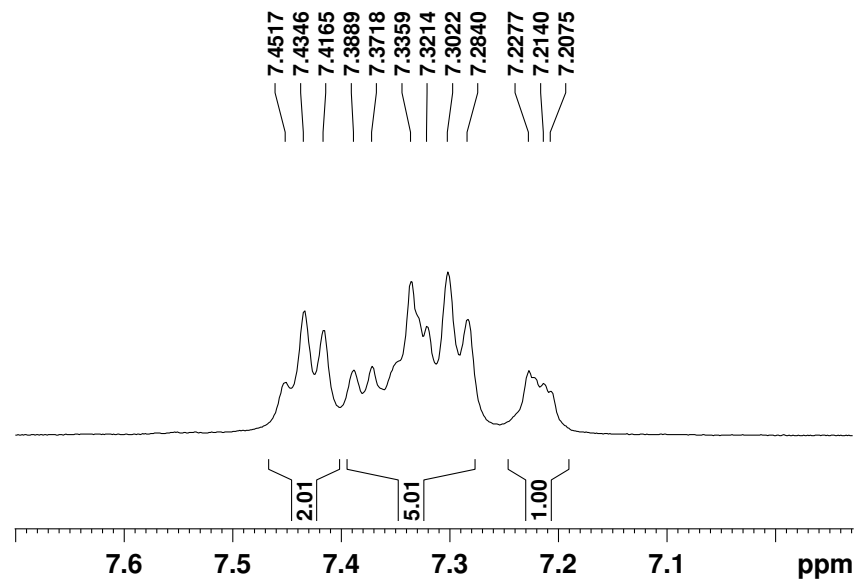

<sup>1</sup>H NMR of 3 IN DMSO

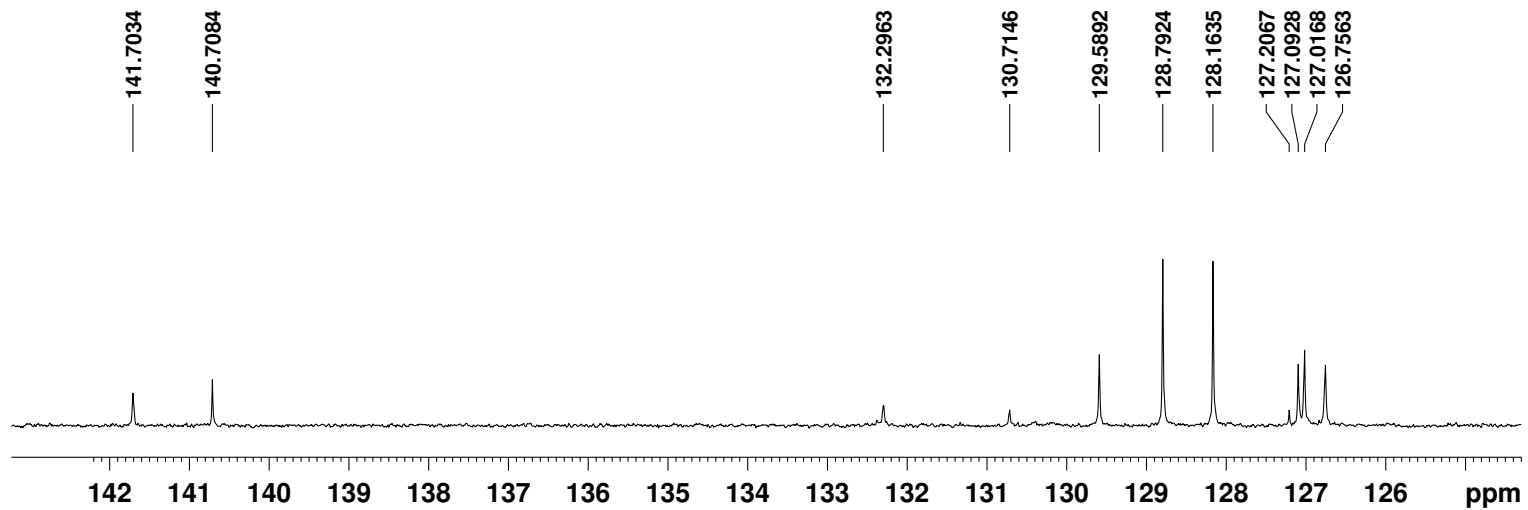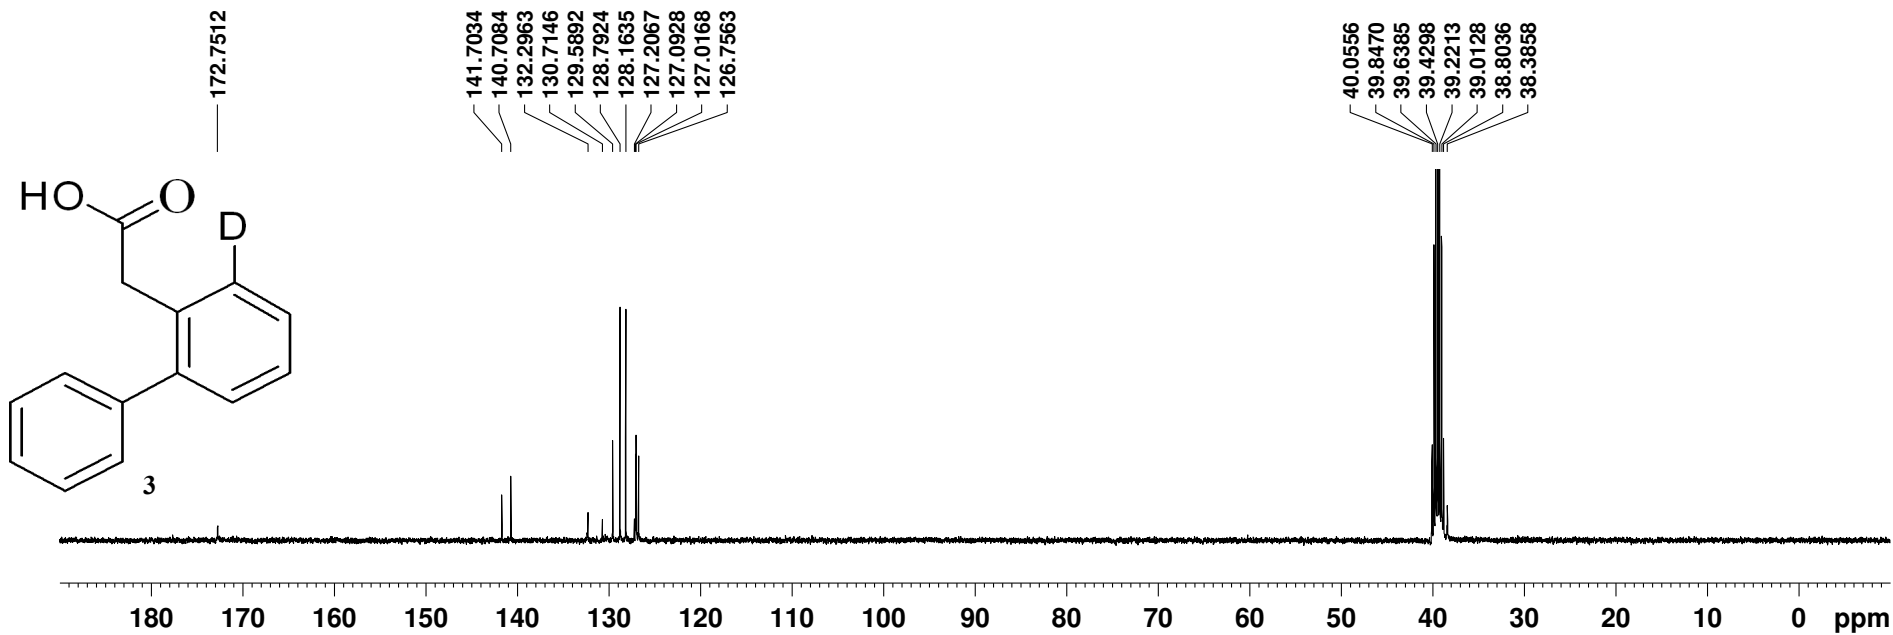

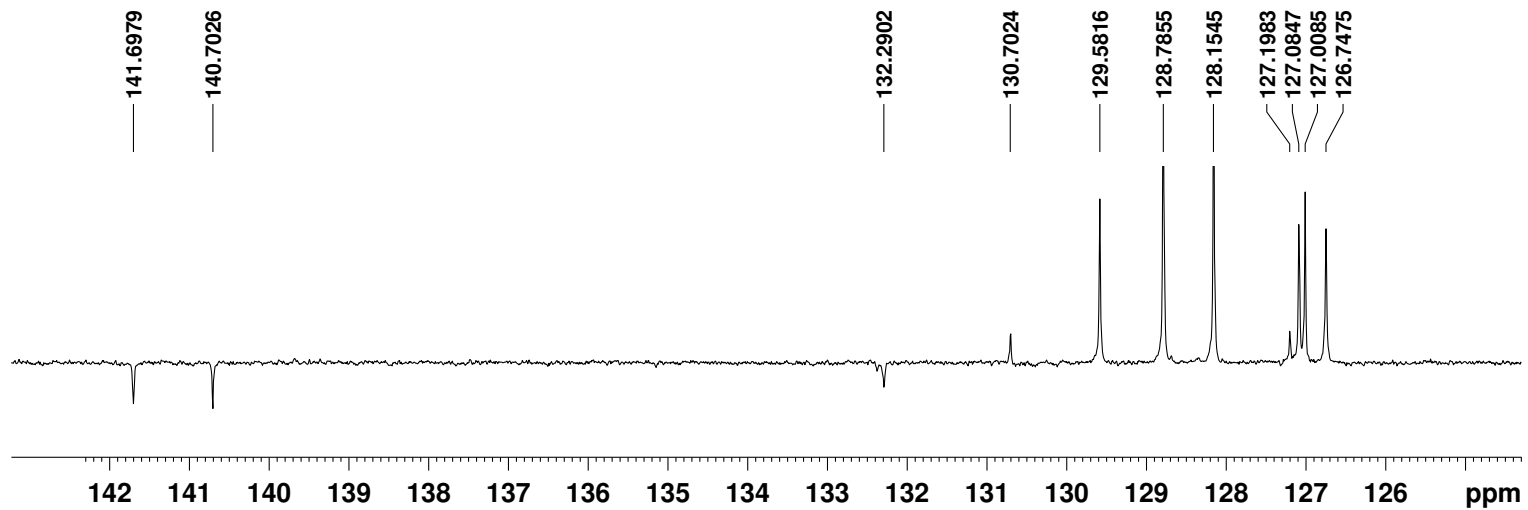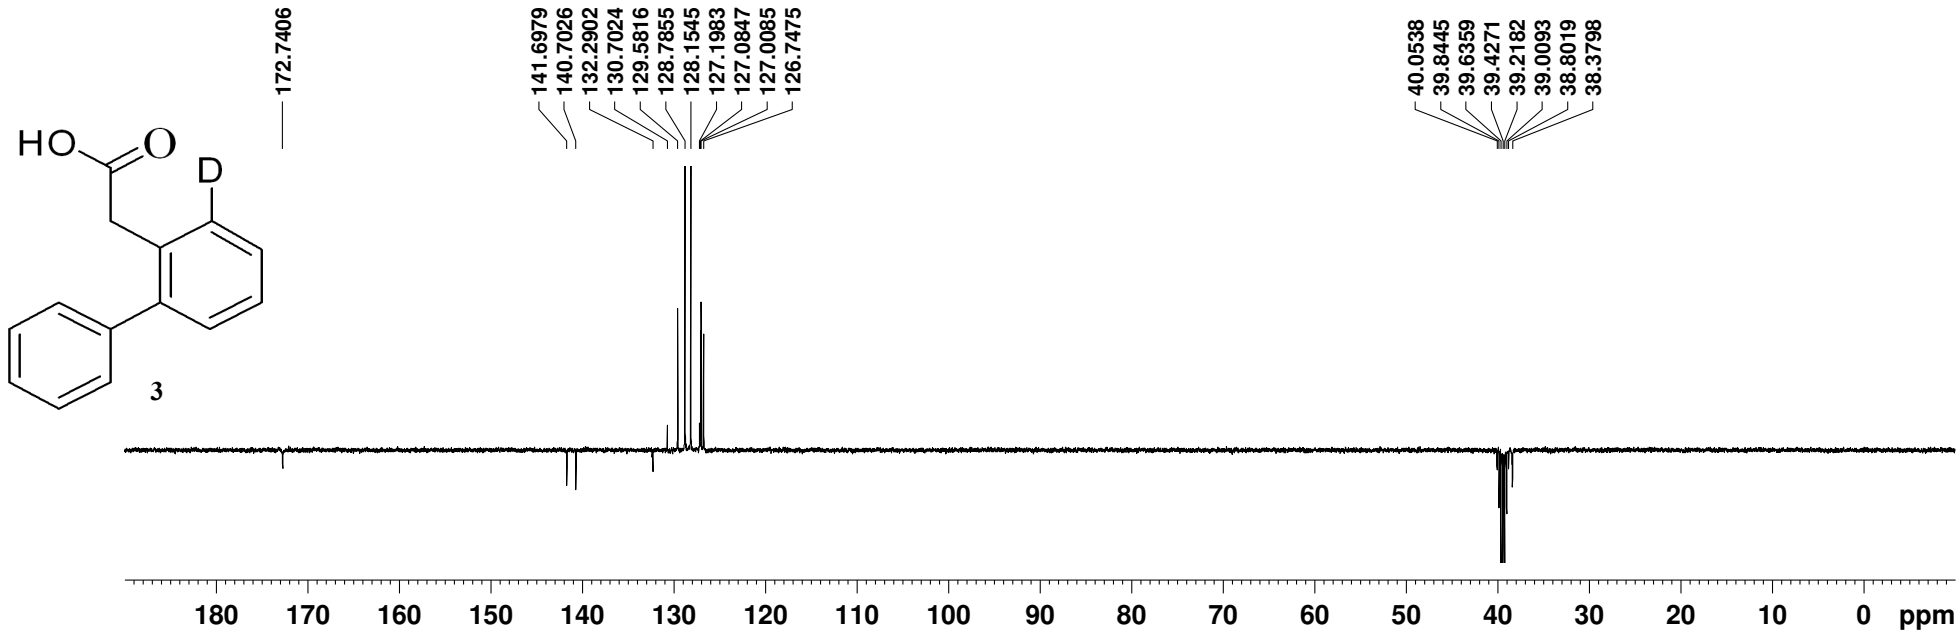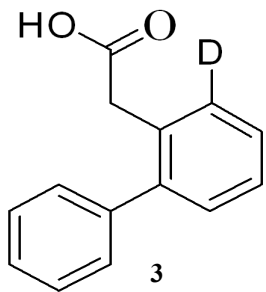

Supplement: d1ob00663k1.pdf [file d1ob00663k1.pdf]
